# Supplementary material
Source: HighWire-hosted journal article supplement (https://bjsm.bmj.com/content/57/9/500)
Supplement: inline-supplementary-material-1 [file inline-supplementary-material-1.pdf]

## **Supplementary file**

### **Contents**

|                                                  |     |
|--------------------------------------------------|-----|
| Systematic search strategy.....                  | 2   |
| Study selection and criteria.....                | 4   |
| PRISMA flow diagram .....                        | 5   |
| Patient demographics.....                        | 6   |
| Summary of critical and important outcomes ..... | 13  |
| Risk of Bias assessment.....                     | 14  |
| GRADE Evidence Assessment.....                   | 30  |
| Summary of Findings tables .....                 | 31  |
| Recommendations level of agreement.....          | 158 |



|                            |                                                                                                                                                                                                                                                                                                                                                                                                                                                                                                                                                                                                                                                                                                                                                                                                                                                                                                                                                                                                                                                                                                                                                                                                                            |           |
|----------------------------|----------------------------------------------------------------------------------------------------------------------------------------------------------------------------------------------------------------------------------------------------------------------------------------------------------------------------------------------------------------------------------------------------------------------------------------------------------------------------------------------------------------------------------------------------------------------------------------------------------------------------------------------------------------------------------------------------------------------------------------------------------------------------------------------------------------------------------------------------------------------------------------------------------------------------------------------------------------------------------------------------------------------------------------------------------------------------------------------------------------------------------------------------------------------------------------------------------------------------|-----------|
| 5                          | #1 AND #4                                                                                                                                                                                                                                                                                                                                                                                                                                                                                                                                                                                                                                                                                                                                                                                                                                                                                                                                                                                                                                                                                                                                                                                                                  | 21,263    |
| 6                          | # 5 AND filters “Humans, English”                                                                                                                                                                                                                                                                                                                                                                                                                                                                                                                                                                                                                                                                                                                                                                                                                                                                                                                                                                                                                                                                                                                                                                                          | 14,606    |
| <b>EMBASE (MEDLINE)</b>    |                                                                                                                                                                                                                                                                                                                                                                                                                                                                                                                                                                                                                                                                                                                                                                                                                                                                                                                                                                                                                                                                                                                                                                                                                            |           |
|                            | Query('postoperative care':ab,ti OR 'physical therapy':ab,ti OR 'exercise therapy':ab,ti OR 'pain management index':ab,ti OR 'patient education':ab,ti OR 'weight bearing exercise program':ab,ti OR 'range of motion':ab,ti OR 'treatment outcome':ab,ti OR cryotherapy:ab,ti OR 'movement therapy':ab,ti OR biofeedback:ab,ti OR proprioception:ab,ti OR 'muscle strength':ab,ti OR 'outcome assessment':ab,ti OR plyometrics:ab,ti OR 'resistance training':ab,ti OR rehabilitation:ab,ti OR physiotherapy:ab,ti OR 'preoperative exercise':ab,ti OR 'supervised exercise therapy':ab,ti OR electrotherapy:ab,ti OR 'dry needling':ab,ti OR kinesiotherapy:ab,ti OR 'joint laxity':ab,ti OR stability:ab,ti OR effusion:ab,ti OR balance:ab,ti OR stretching:ab,ti OR 'strengthening exercise':ab,ti OR vibration:ab,ti OR perturbation:ab,ti OR performance:ab,ti OR test:ab,ti OR criteria:ab,ti OR 'cross education':ab,ti OR 'blood flow restriction':ab,ti OR cost:ab,ti OR prevention:ab,ti OR prediction:ab,ti OR 'return to play':ab,ti OR 'return to sport':ab,ti) AND ('anterior cruciate ligament reconstruction':ab,ti OR acl:ab,ti OR 'anterior cruciate ligament':ab,ti) AND 'human'/de AND [english]/lim | 13,150    |
| <b>COCHRANE</b>            |                                                                                                                                                                                                                                                                                                                                                                                                                                                                                                                                                                                                                                                                                                                                                                                                                                                                                                                                                                                                                                                                                                                                                                                                                            |           |
|                            |                                                                                                                                                                                                                                                                                                                                                                                                                                                                                                                                                                                                                                                                                                                                                                                                                                                                                                                                                                                                                                                                                                                                                                                                                            |           |
|                            | “anterior cruciate ligament reconstruction” OR “ACL” OR “anterior cruciate ligament”                                                                                                                                                                                                                                                                                                                                                                                                                                                                                                                                                                                                                                                                                                                                                                                                                                                                                                                                                                                                                                                                                                                                       | 3,487     |
| <b>CINAHL (EBSCO)</b>      |                                                                                                                                                                                                                                                                                                                                                                                                                                                                                                                                                                                                                                                                                                                                                                                                                                                                                                                                                                                                                                                                                                                                                                                                                            |           |
| 1                          | “anterior cruciate ligament reconstruction”                                                                                                                                                                                                                                                                                                                                                                                                                                                                                                                                                                                                                                                                                                                                                                                                                                                                                                                                                                                                                                                                                                                                                                                | 7,139     |
| 2                          | “physiotherapy” OR “rehabilitation” OR “exercise” OR “intervention” OR “pain management” OR “training” OR “dry needling” OR “cryotherapy” OR “biofeedback” OR “balance” “treatment” “return to sport”                                                                                                                                                                                                                                                                                                                                                                                                                                                                                                                                                                                                                                                                                                                                                                                                                                                                                                                                                                                                                      | 1,919,720 |
| 3                          | #1 AND #2                                                                                                                                                                                                                                                                                                                                                                                                                                                                                                                                                                                                                                                                                                                                                                                                                                                                                                                                                                                                                                                                                                                                                                                                                  | 4,197     |
| 4                          | #3, Limited to English language, Humans                                                                                                                                                                                                                                                                                                                                                                                                                                                                                                                                                                                                                                                                                                                                                                                                                                                                                                                                                                                                                                                                                                                                                                                    | 2,757     |
| <b>SPORTDiscus (EBSCO)</b> |                                                                                                                                                                                                                                                                                                                                                                                                                                                                                                                                                                                                                                                                                                                                                                                                                                                                                                                                                                                                                                                                                                                                                                                                                            |           |
| 1                          | “anterior cruciate ligament reconstruction”                                                                                                                                                                                                                                                                                                                                                                                                                                                                                                                                                                                                                                                                                                                                                                                                                                                                                                                                                                                                                                                                                                                                                                                | 3,717     |
| 2                          | “physiotherapy” OR “rehabilitation” OR “exercise” OR “intervention” OR “pain management” OR “training” OR “dry needling” OR “cryotherapy” OR “biofeedback” OR “balance” “treatment” “return to sport”                                                                                                                                                                                                                                                                                                                                                                                                                                                                                                                                                                                                                                                                                                                                                                                                                                                                                                                                                                                                                      | 65,504    |
| 3                          | #1 AND #2                                                                                                                                                                                                                                                                                                                                                                                                                                                                                                                                                                                                                                                                                                                                                                                                                                                                                                                                                                                                                                                                                                                                                                                                                  | 3,523     |
| 4                          | #3, Limited to English language, Humans                                                                                                                                                                                                                                                                                                                                                                                                                                                                                                                                                                                                                                                                                                                                                                                                                                                                                                                                                                                                                                                                                                                                                                                    | 2,349     |

## Study selection and criteria

To be included, an article had to meet the following selection criteria:

- Study was of rehabilitation after ACL surgery.
- Study was performed in humans.
- Study design was a systematic review, a meta-analysis, or a randomized controlled trial, peer reviewed in English language.
- Study that compared physical therapy interventions or against no intervention, placebo, or standard care.
- Study results included outcomes of interest: strength, muscle atrophy, pain, range of motion, patient-reported outcome measures (PROMs), swelling, laxity, functional activities, adverse events, return to activity.

The following publications were excluded:

- Animal or laboratory studies
- Studies performed on cadavers.
- Non-randomised trials, observational studies, case series and case reports, analyses of medical records, narrative reviews, editorials, letters, and commentaries
- Studies that did not report on any outcomes of interest.
- Rehabilitation in a paediatric population
- Studies in patients after ACL treated conservatively.
- Studies in patients after completion of their rehabilitation
- Studies reporting only biomechanical results.
- Studies reporting specifics only on other concomitant injuries such as other knee ligament injuries, meniscal or cartilage injuries surgical decisions (e.g., brace), nutritional, and psychological interventions.

PRISMA flow diagram**Figure S1** PRISMA study selection flow chart.

## Patient demographics

### TIMING AND STRUCTURE OF REHABILITATION

#### Pre-operative rehabilitation

|                      | Preop                   |    |    |     |           |                 | Controls |    |    |     |           |                 | Total      |            |           |       |                                                                              |  |
|----------------------|-------------------------|----|----|-----|-----------|-----------------|----------|----|----|-----|-----------|-----------------|------------|------------|-----------|-------|------------------------------------------------------------------------------|--|
|                      | n                       | M  | F  | age | graft     |                 | n        | M  | F  | age | graft     | n               | M          | F          | age       | graft |                                                                              |  |
| <b>Shaarani 2013</b> | preop                   | 14 | 14 | 0   | 27.6±7.9  | BTB             | no preop | 9  | 9  | 0   | 32±8.3    | BTB             | 23         | 23         | 0         | NR    | 23 BTB                                                                       |  |
| <b>Kim 2015</b>      | preop                   | 40 | 40 | 0   | NR        | NR              | no preop | 40 | 40 | 0   | NR        | NR              | 80         | 80         | 0         | 28±6  | 80 NR                                                                        |  |
| <b>Reddy 2020</b>    | preop                   | 20 | 19 | 1   | 28.2      | HS              | no preop | 21 | 19 | 2   | 27.5      | HS              | 41         | 38         | 3         | NR    | 41 HS                                                                        |  |
| <b>Hartigan 2009</b> | Perturbation + strength | 9  | 6  | 3   | 28±10.7   | HS or allograft | strength | 10 | 7  | 3   | 30±9.4    | HS or allograft | 19         | 13         | 6         | NR    | 19 HS/ALLO                                                                   |  |
| <b>Hartigan 2010</b> | Perturbation + strength | 18 | 12 | 6   | 27.1±10.2 | HS or allograft | strength | 22 | 17 | 5   | 29.5±10.8 | HS or allograft | 40         | 29         | 11        | NR    | 40 HS/ALLO                                                                   |  |
|                      |                         |    |    |     |           |                 |          |    |    |     |           |                 | <b>184</b> | <b>170</b> | <b>14</b> |       | <b>23 BTB</b><br><b>41 HS</b><br><b>40</b><br><b>HS/ALLO</b><br><b>80 NR</b> |  |

#### Unsupervised vs supervised rehabilitation

|                     | Unsupervised |    |    |     |             |                | Clinic           |    |    |     |            |               | Total      |            |            |              |                                                                 |  |
|---------------------|--------------|----|----|-----|-------------|----------------|------------------|----|----|-----|------------|---------------|------------|------------|------------|--------------|-----------------------------------------------------------------|--|
|                     | n            | M  | F  | age | graft       |                | n                | M  | F  | age | graft      | n             | M          | F          | age        | graft        |                                                                 |  |
| <b>Schenck 1997</b> | Unsupervised | 22 | NR | NR  | NR          | BTB            | Clinic           | 15 | NR | NR  | NR         | BTB           | 37         | 28         | 9          | 24.1         | 37 BTB                                                          |  |
| <b>Beard 1998</b>   | Unsupervised | 13 | 10 | 3   | 27          | BTB            | Home+ supervised | 13 | 11 | 2   | 29         | BTB           | 26         | 21         | 5          | 28 (20-46)   | 26 BTB                                                          |  |
| <b>Fischer 1998</b> | Unsupervised | 27 | 16 | 11  | 33 (16-44)  | BTB/ALLO       | Clinic           | 27 | 13 | 14  | 28 (15-39) | BTB/ALLO      | 54         | 29         | 25         |              | 54 BTB/ALLO                                                     |  |
| <b>Grant 2005</b>   | Unsupervised | 73 | 47 | 26  | 29.1±9.2    | BTB            | Clinic           | 72 | 38 | 34  | 29.5±10.2  | BTB           | 145        | 85         | 60         |              | 145 BTB                                                         |  |
| <b>Ugutmen 2008</b> | Unsupervised | 52 | NR | NR  | NR          | HS             | Clinic           | 52 | NR | NR  | NR         | HS            | 104        | 103        | 1          | 31.5 (18-43) | 104 HS                                                          |  |
| <b>Revenas 2009</b> | Unsupervised | 24 | 15 | 9   | 25 (16-40)  | 16 BTB<br>8 HS | Clinic           | 14 | 11 | 3   | 21 (16-35) | 7 BTB<br>7 HS | 38         | 26         | 12         | 23 (16-40)   | 23 BTB<br>15 HS                                                 |  |
| <b>Grant 2010</b>   | Unsupervised | 40 | 27 | 13  | 30.8±10.1   | BTB            | Clinic           | 48 | 23 | 25  | 30.3±11.1  | BTB           | 88         | 50         | 38         |              | 88 BTB                                                          |  |
| <b>Hohmann 2011</b> | Unsupervised | 20 | 14 | 6   | 27 (19-35)  | BTB            | Clinic           | 20 | 16 | 4   | 28 (20-34) | BTB           | 40         | 30         | 10         |              | 40 BTB                                                          |  |
| <b>Lim 2019</b>     | Unsupervised | 15 | 9  | 6   | 38.79±12.58 | HS             | Clinic           | 15 | 10 | 5   | 32.25±8.26 | HS            | 30         | 19         | 11         |              | 30 HS                                                           |  |
|                     |              |    |    |     |             |                |                  |    |    |     |            |               | <b>562</b> | <b>391</b> | <b>171</b> |              | <b>359 BTB</b><br><b>149 HS</b><br><b>54</b><br><b>BTB/ALLO</b> |  |

#### Rehabilitation duration

|                     | Accelerated Rehabilitation (19-week) |    |    |     |           |     | Controls |    |    |     |          |     | Total      |           |           |       |                               |  |
|---------------------|--------------------------------------|----|----|-----|-----------|-----|----------|----|----|-----|----------|-----|------------|-----------|-----------|-------|-------------------------------|--|
|                     | n                                    | M  | F  | age | graft     |     | n        | M  | F  | age | graft    | n   | M          | F         | age       | graft |                               |  |
| <b>Beynnon 2011</b> | ACC                                  | 19 | 13 | 6   | 29.7±10.1 | BTB | Non-ACC  | 17 | 9  | 8   | 30.2±9.9 | BTB | 36         | 22        | 14        |       | 36 BTB                        |  |
| <b>Gupta 2017</b>   | ACC                                  | 20 | 20 | 0   | 26.5±4.7  | HS  | Non-ACC  | 20 | 18 | 2   | 28.9±6.3 | HS  | 40         | 38        | 2         |       | 40 HS                         |  |
|                     |                                      |    |    |     |           |     |          |    |    |     |          |     | <b>106</b> | <b>60</b> | <b>16</b> |       | <b>36 BTB</b><br><b>40 HS</b> |  |

## MODALITIES

## Continuous passive motion (CPM)

|                                           | CPM        |    |    |     |           | Controls        |        |    |     |       | Total    |                 |            |           |       |          |                 |              |
|-------------------------------------------|------------|----|----|-----|-----------|-----------------|--------|----|-----|-------|----------|-----------------|------------|-----------|-------|----------|-----------------|--------------|
|                                           | n          | M  | F  | age | graft     | n               | M      | F  | age | graft | n        | M               | F          | age       | graft |          |                 |              |
| <b>CPM vs no CPM</b>                      |            |    |    |     |           |                 |        |    |     |       |          |                 |            |           |       |          |                 |              |
| Anderson 1989                             | CPM        | 19 | 11 | 8   | 22.8      | HS              | No CPM | 20 | 11  | 9     | 20.4     | HS              | 39         | 22        | 17    | NR       | 39 HS           |              |
| Yates 1992                                | CPM        | 15 | 6  | 9   | 25.5±10.5 | BTB             | No CPM | 15 | 9   | 6     | 25.3±7.7 | BTB             | 30         | 15        | 15    | 25.4±9.1 | 30 BTB          |              |
| McCarthy 1993a                            | CPM        | 10 | 4  | 6   | 25.1±10.5 | BTB             | No CPM | 10 | 4   | 6     | 24.8±8.2 | BTB             | 20         | 8         | 12    | NR       | 20 BTB          |              |
| McCarthy 1993b                            | CPM        | 15 | 6  | 9   | 25.5±10.5 | BTB             | No CPM | 15 | 9   | 6     | 25.3±7.7 | BTB             | 30         | 15        | 15    | 25.4±9.1 | 30 BTB          |              |
| <b>CPM vs active motion</b>               |            |    |    |     |           |                 |        |    |     |       |          |                 |            |           |       |          |                 |              |
| Engstrom 1995                             | CPM+Active | 17 | NR | NR  |           | BTB             | Active | 17 | NR  | NR    | NR       | BTB             | 34         | 25        | 9     | 27±8     | 34 BTB          |              |
| Friemert 2005                             | CPM        | 30 | 29 | 1   | NR        | 12 BTB<br>18 HS | Active | 30 | 28  | 2     | NR       | 10 BTB<br>20 HS | 60         | 57        | 3     | 23±3.6   | 22 BTB<br>38 HS |              |
| Rosen 1992                                | CPM        | 25 | 20 | 5   | 25±8      | BTB             | Active | 25 | 19  | 6     | 29±9     | BTB             | 50         | 39        | 11    | NR       | 50 BTB          |              |
| <b>Long term vs short term use of CPM</b> |            |    |    |     |           |                 |        |    |     |       |          |                 |            |           |       |          |                 |              |
| Richmond 1991                             | CPM-14d    | 9  | 5  | 4   |           | BTB             | CPM-4d | 10 | 7   | 3     |          | BTB             | 19         | 12        | 7     | NR       | 19 BTB          |              |
|                                           |            |    |    |     |           |                 |        |    |     |       |          | <b>282</b>      | <b>193</b> | <b>89</b> |       |          | <b>205 BTB</b>  | <b>77 HS</b> |

## Cryotherapy

|                                | Cryotherapy      |    |    |     |           | Controls           |                 |    |     |       | Total    |                    |            |            |       |    |                    |               |                |                |
|--------------------------------|------------------|----|----|-----|-----------|--------------------|-----------------|----|-----|-------|----------|--------------------|------------|------------|-------|----|--------------------|---------------|----------------|----------------|
|                                | n                | M  | F  | age | graft     | n                  | M               | F  | age | graft | n        | M                  | F          | age        | graft |    |                    |               |                |                |
| <b>Cryotherapy</b>             |                  |    |    |     |           |                    |                 |    |     |       |          |                    |            |            |       |    |                    |               |                |                |
| Cohn 1989                      | Ice              | 26 | 17 | 9   | 22.9      | BTB                | No cold         | 28 | 15  | 13    | 25.1     | BTB                | 54         | 32         | 22    | NR | 54 BTB             |               |                |                |
| Daniel 1994                    | Ice pad (5°C)    | 16 | 11 | 5   | 27        | BTB                | No cold         | 42 | 30  | 12    | 26       | BTB                | 58         | 41         | 17    | NR | 58 BTB             |               |                |                |
| Brandsson 1996                 | Cold             | 20 | NR | NR  | NR        | BTB                | No cold         | 10 | NR  | NR    | NR       | BTB                | 30         | NR         | NR    | 26 | 30 BTB             |               |                |                |
| Konrath 1996                   | Polar cold       | 27 | *  | *   | 27        | BTB                | No cold         | 27 | 16  | 11    | 26       | BTB                | 54         | *          | *     | NR | 54 BTB             |               |                |                |
| Edwards 1996                   | Ice              | 26 | 18 | 8   | 28.7      | BTB                | No cold         | 24 | 15  | 9     | 28       | BTB                | 50         | 33         | 17    | NR | 50 BTB             |               |                |                |
| Barber 1998                    | ice water        | 51 | 34 | 17  | NR        | BTB                | No cold         | 49 | 40  | 9     | NR       | BTB                | 100        | 74         | 26    | 34 | 100 BTB            |               |                |                |
| Dervin 1998                    | ice water        | 40 | 27 | 13  | 30.6±10.2 | BTB                | No cold         | 38 | 27  | 11    | 26.9±6.2 | BTB                | 78         | 54         | 24    | NR | 78 BTB             |               |                |                |
| Ohkoshi 1999                   | Cold (5°C)       | 7  | NR | NR  | NR        | HS                 | No cold         | 7  | NR  | NR    | NR       | HS                 | 14         | NR         | NR    | NR | 14 HS              |               |                |                |
| Koyonos 2014                   | Cold preop)      | 27 | NR | NR  | NR        | 16 ALLO<br>11 AUTO | No cold (preop) | 26 | NR  | NR    | NR       | 15 ALLO<br>11 AUTO | 53         | 30         | 23    | 29 | 31 ALLO<br>22 AUTO |               |                |                |
| <b>Compressive cryotherapy</b> |                  |    |    |     |           |                    |                 |    |     |       |          |                    |            |            |       |    |                    |               |                |                |
| Schroder 1994                  | cold compression | 21 | 15 | 6   | 24.8      | BTB                | ice             | 23 | 18  | 5     | 24.2     | BTB                | 44         | 33         | 11    | NR | 44 BTB             |               |                |                |
| Waterman 2012                  | cold compression | 18 | 15 | 3   | 28.7      | 8 ALLO<br>10 AUTO  | ice             | 18 | 15  | 3     | 30.9     | 10 ALLO<br>8 AUTO  | 36         | 30         | 6     | NR | 18 ALLO<br>18 AUTO |               |                |                |
| Ruffilli 2015                  | cold compression | 23 | 14 | 9   | 32.2      | HS                 | ice             | 24 | 15  | 9     | 31.4     | HS                 | 47         | 29         | 18    | NR | 47 HS              |               |                |                |
| Kijkunasathian 2017            | cold compression | 20 | 18 | 2   | 25.1      | HS                 | ice             | 20 | 18  | 2     | 29.6     | HS                 | 40         | 36         | 4     | NR | 40 HS              |               |                |                |
| Dambros 2012                   | cold compression | 10 | 10 | 0   | 31.9      | HS                 | No cold         | 9  | 9   | 0     | 27.2     | HS                 | 19         | 19         | 0     | NR | 19 HS              |               |                |                |
|                                |                  |    |    |     |           |                    |                 |    |     |       |          | <b>677</b>         | <b>411</b> | <b>168</b> |       |    | <b>468 BTB</b>     | <b>120 HS</b> | <b>49 ALLO</b> | <b>40 AUTO</b> |

\*Authors report 11 male and 6 female participants

## Neuromuscular Electrical Stimulation (NMES)

|                                                    | NMES              |    |    |     |            | Controls                 |            |    |     |       | Total       |                      |     |     |       |            |                                                                         |
|----------------------------------------------------|-------------------|----|----|-----|------------|--------------------------|------------|----|-----|-------|-------------|----------------------|-----|-----|-------|------------|-------------------------------------------------------------------------|
|                                                    | n                 | M  | F  | age | graft      | n                        | M          | F  | age | graft | n           | M                    | F   | age | graft |            |                                                                         |
| <b>Neuromuscular Electrical Stimulation (NMES)</b> |                   |    |    |     |            |                          |            |    |     |       |             |                      |     |     |       |            |                                                                         |
| Sisk 1987                                          | NMES              | 11 | 6  | 5   | 23.4±7.5   | HS/ITB                   | No NMES    | 11 | 7   | 4     | 23.9±9.2    | HS/ITB               | 22  | 13  | 9     | NR         | 22 HS/ITB                                                               |
| Delitto 1988                                       | NMES              | 10 | NR | NR  | NR         | NR                       | No NMES    | 10 | NR  | NR    | NR          | NR                   | 20  | NR  | NR    | 29 (19-44) | 20 NR                                                                   |
| Wigerstad-Lossing 1988                             | NMES              | 13 | 11 | 2   | 28 (21-45) | BTB                      | No NMES    | 10 | 5   | 5     | 26 (21-33)  | BTB                  | 23  | 16  | 7     | 28 (21-45) | 23 BTB                                                                  |
| Snyder-Mackler 1991                                | NMES              | 5  | NR | NR  | NR         | NR                       | No NMES    | 5  | NR  | NR    | NR          | NR                   | 10  | 6   | 4     | 18-28      | 2 BTB<br>8 HS                                                           |
| Snyder-Mackler 1995                                | NMES              | 31 | NR | NR  | NR         | NR                       | No NMES    | 34 | NR  | NR    | NR          | NR                   | 65  | NR  | NR    | 25         | 65 NR                                                                   |
| Lieber 1996                                        | NMES              | 20 | 16 | 4   | 28±8.2     | NR                       | No NMES    | 20 | 16  | 4     | 27.3±8.5    | NR                   | 40  | 32  | 8     | 15-44      | 40 NR                                                                   |
| Paternostro-Sluga 1999                             | NMES              | 16 | 9  | 7   | 27.8±7.1   | BTB                      | No NMES    | 17 | 7   | 10    | 28.6±11.3   | BTB                  | 33  | 16  | 17    | NR         | 33 BTB                                                                  |
| Fitzgerald 2003                                    | NMES              | 21 | 12 | 9   | 29.2±10.1  | 5 BTB<br>12 HS<br>4 ALLO | No NMES    | 22 | 14  | 8     | 31.9±10.9   | 5BTB<br>9HS<br>8ALLO | 43  | 26  | 17    | NR         | 10 BTB<br>21 HS<br>12 ALLO                                              |
| Hasegawa 2011                                      | NMES              | 10 | 8  | 2   | 23.5±9.3   | HS                       | No NMES    | 10 | 8   | 2     | 29.4±14.1   | HS                   | 20  | 16  | 4     | 26.3±11.8  | 20 HS                                                                   |
| Feil 2011                                          | NMES              | 33 | 25 | 8   | 31.1±1.52  | HS                       | No NMES    | 34 | 27  | 7     | 31.6±1.36   | HS                   | 67  | 52  | 15    | 31.3       | 67 HS                                                                   |
| Ediz 2012                                          | NMES              | 13 | 10 | 3   | 28.3±9.9   | HS                       | No NMES    | 13 | 11  | 2     | 27.6±9.6    | HS                   | 26  | 21  | 5     | NR         | 26 HS                                                                   |
| Taradaj 2013                                       | NMES              | 40 | 40 | 0   | 22.4±5.8   | HS                       | No NMES    | 40 | 40  | 0     | 21.3±5.7    | HS                   | 80  | 80  | 0     | 22±5       | 80 HS                                                                   |
| Wright 2019                                        | NMES              | 14 | 9  | 5   | 29(17-51)  | AUTO/<br>ALLO            | No NMES    | 11 | 10  | 1     | 32.9(16-54) | AUTO/<br>ALLO        | 25  | 19  | 6     | 30.8±11.7  | 25 AUTO/<br>ALLO                                                        |
| Toth 2020                                          | NMES              | 12 | 5  | 7   | 25±2       | 10 BTB<br>2 ALLO         | Sham       | 9  | 4   | 5     | 24±3        | 7BTB<br>1ALLO<br>1HS | 21  | 9   | 12    | NR         | 17 BTB<br>3 ALLO<br>1 HS                                                |
| <b>Functional NMES</b>                             |                   |    |    |     |            |                          |            |    |     |       |             |                      |     |     |       |            |                                                                         |
| Ross 2000                                          | NMES+CKC          | 10 | 6  | 4   | 27.1±4.9   | BTB                      | CKC        | 10 | 7   | 3     | 28.4±5.9    | BTB                  | 20  | 13  | 7     | NR         | 20 BTB                                                                  |
| Labanca 2018                                       | NMES+sit-to-stand | 16 | 16 | 0   | 23.2±4.6   | BTB                      | Usual care | 17 | 17  | 0     | 22±3.2      | BTB                  | 33  | 33  | 0     | NR         | 33 BTB                                                                  |
| Moran 2019                                         | NMES+walkin g     | 10 | 10 | 0   | 20.4±1.1   | BTB/HS                   | NMES       | 13 | 13  | 0     | 21.6±4.2    | BTB/HS               | 26  | 26  | 0     | NR         | 26 BTB/HS                                                               |
|                                                    |                   |    |    |     |            |                          |            |    |     |       |             | 574                  | 378 | 111 |       |            | 138 BTB<br>245 HS<br>15 ALLO<br>125 NR<br>26 BTB/HS<br>25 AUTO/<br>ALLO |

## Electromyographic biofeedback (EMG-BFB)

|                  | EMG-BFB |    |    |     |          | Controls |            |    |     |       | Total    |     |    |     |       |            |        |
|------------------|---------|----|----|-----|----------|----------|------------|----|-----|-------|----------|-----|----|-----|-------|------------|--------|
|                  | n       | M  | F  | age | graft    | n        | M          | F  | age | graft | n        | M   | F  | age | graft |            |        |
| Draper 1990      | EMG-BFB | 11 | NR | NR  | NR       | BTB      | No EMG-BFB | 11 | NR  | NR    | NR       | BTB | 22 | 15  | 7     | 23 (16-36) | 22 BTB |
| Christanell 2012 | EMG-BFB | 8  | NR | NR  | 32.9±9.3 | BTB      | No EMG-BFB | 8  | NR  | NR    | 27.1±6.2 | BTB | 16 | 12  | 4     | 30 (20-49) | 16 BTB |
|                  |         |    |    |     |          |          |            |    |     |       |          | 38  | 27 | 11  |       |            | 38 BTB |

## Blood flow restriction (BFR)

|                   | BFR |    |    |     |          | Controls               |        |    |     |       | Total    |                        |     |     |       |                        |  |                          |
|-------------------|-----|----|----|-----|----------|------------------------|--------|----|-----|-------|----------|------------------------|-----|-----|-------|------------------------|--|--------------------------|
|                   | n   | M  | F  | age | graft    | n                      | M      | F  | age | graft | n        | M                      | F   | age | graft |                        |  |                          |
| Ohta 2003         | BFR | 22 | 13 | 9   | 28±9.7   | HS                     | no BFR | 22 | 12  | 10    | 30±9.7   | HS                     | 44  | 25  | 19    | 44 HS                  |  |                          |
| Iversen 2016      | BFR | 12 | 7  | 5   | 24.9±7.4 | HS                     | no BFR | 12 | 7   | 5     | 29.8±9.3 | HS                     | 24  | 14  | 10    | 24 HS                  |  |                          |
| Hughes 2019a      | BFR | 12 | 7  | 5   | 29±7     | HS                     | no BFR | 12 | 10  | 2     | 29±7     | HS                     | 24  | 17  | 7     | 24 HS                  |  |                          |
| Hughes 2019b      | BFR | 12 | 7  | 5   | 29±7     | HS                     | no BFR | 12 | 10  | 2     | 29±7     | HS                     | 24  | 17  | 7     | 24 HS                  |  |                          |
| Curran 2020       | BFR | 18 | 10 | 8   | 15.7±1.3 | 13 BTB<br>3 HS<br>2 QT | no BFR | 16 | 5   | 11    | 17.4±3.5 | 12 BTB<br>3 HS<br>1 QT | 34  | 15  | 19    | 25 BTB<br>6 HS<br>3 QT |  |                          |
| Grapar Zargi 2016 | BFR | 10 | 8  | 2   | 33±7     | HS                     | sham   | 10 | 8   | 2     | 34±10    | HS                     | 20  | 16  | 4     | 20 HS                  |  |                          |
| Zargi 2018        | BFR | 10 | 8  | 2   | 34±6     | HS                     | sham   | 10 | 8   | 2     | 35±5     | HS                     | 20  | 16  | 4     | 20 HS                  |  |                          |
|                   |     |    |    |     |          |                        |        |    |     |       |          | 190                    | 120 | 70  | 28    |                        |  | 25 BTB<br>162 HS<br>3 QT |



## EXERCISED-BASED REHABILITATION

### Early phase rehabilitation

|                                                       | Early                 |    |    |     |            | Controls        |                   |    |     |       | Total      |                 |     |     |       |                                     |                 |
|-------------------------------------------------------|-----------------------|----|----|-----|------------|-----------------|-------------------|----|-----|-------|------------|-----------------|-----|-----|-------|-------------------------------------|-----------------|
|                                                       | n                     | M  | F  | age | graft      | n               | M                 | F  | age | graft | n          | M               | F   | age | graft |                                     |                 |
| <b>Early mobilisation</b>                             |                       |    |    |     |            |                 |                   |    |     |       |            |                 |     |     |       |                                     |                 |
| Haggmark 1979                                         | Brace                 | 8  | 7  | 1   | 28.9±5.7   | BTB             | Cast              | 8  | 7   | 1     | 27.8±2.5   | BTB             | 16  | 14  | 2     | 28.3±4.5                            | 16 BTB          |
| Henriksson 2002                                       | Brace                 | 22 | 18 | 4   | 24±5       | BTB             | Cast              | 23 | 16  | 7     | 24±6       | BTB             | 45  | 34  | 11    | NR                                  | 45 BTB          |
| Hiemstra 2009                                         | No Imob               | 44 | 27 | 17  | 29.4±5.8   | HS              | Imob              | 44 | 26  | 18    | 27.8±5.8   | HS              | 88  | 53  | 35    | NR                                  | 88 HS           |
| Ito 2007                                              | 3 days immobilization | 15 | 10 | 5   | 29.2±10    | HS              | 2w immobilization | 15 | 6   | 9     | 27.3±10.9  | HS              | 30  | 16  | 14    | NR                                  | 30 HS           |
| Noyes 1987                                            | Early CPM             | 9  | 5  | 4   | 23.7±9.8   | ALLO/BTB        | Delayed CPM       | 9  | 7   | 2     | 22.6±4.3   | ALLO/BTB        | 18  | 12  | 6     | 23.1±7.6                            | ALLO/BTB        |
| Isberg 2006                                           | Early EXT             | 11 | 5  | 6   | 25 (16-41) | BTB             | Late EXT          | 11 | 9   | 2     | 21 (17-38) | BTB             | 22  | 14  | 8     | NR                                  | 22 BTB          |
| Vadala 2007                                           | Early Mob             | 18 | 13 | 5   | 29 (16-42) | HS              | Late Mob          | 23 | 17  | 6     | 30 (17-44) | HS              | 45  | 33  | 12    | NR                                  | 45 HS           |
| Christensen 2013                                      | Early Mob +imm WB     | 19 | 10 | 9   | 30.1±10.5  | HS              | Late Mob +late WB | 17 | 15  | 2     | 33.1±10.9  | HS              | 36  | 25  | 11    | 31.5±10.6                           | 36 HS           |
| <b>Immediate weight bearing</b>                       |                       |    |    |     |            |                 |                   |    |     |       |            |                 |     |     |       |                                     |                 |
| Tyler 1998                                            | Early WB              | 25 | NR | NR  | NR         | BTB             | Late WB           | 20 | NR  | NR    | NR         | BTB             | 45  | 21  | 24    | 30±1                                | 45 BTB          |
| <b>Early open-kinetic chain exercises</b>             |                       |    |    |     |            |                 |                   |    |     |       |            |                 |     |     |       |                                     |                 |
| Heijne 2007                                           | Early OKC-BTB         | 19 | 11 | 8   | 31±8       | BTB             | Late OKC-BTB      | 15 | 11  | 4     | 27±5       | BTB             | 34  | 22  | 12    | NR                                  | 34 BTB          |
|                                                       | Early OKC-HS          | 17 | 7  | 10  | 30±8       | HS              | Late OKC-HS       | 17 | 7   | 10    | 31±9       | HS              | 34  | 14  | 20    | NR                                  | 34 HS           |
| Fukuda 2013                                           | Early OKC             | 23 | 16 | 7   | 26.5±8.5   | HS              | Late OKC          | 22 | 13  | 9     | 23.9±5.5   | HS              | 45  | 29  | 16    | NR                                  | 45 HS           |
| <b>Early (quadriceps and hamstring) strengthening</b> |                       |    |    |     |            |                 |                   |    |     |       |            |                 |     |     |       |                                     |                 |
| Shaw 2005                                             | Early ISOM            | 55 | 41 | 14  | 28.8±9.3   | 31 BTB<br>24 HS | Usual care        | 48 | 34  | 14    | 28.4±8.1   | 32 BTB<br>16 HS | 103 | 75  | 28    | 28.6±8.8                            | 63 BTB<br>40 HS |
| Kinikli 2014                                          | Early Leg Press       | 16 | NR | NR  | 33.87±8.19 | HS              | Usual care        | 17 | NR  | NR    | 32.64±8.21 | HS              | 33  | 31  | 2     | 33.2±8.1                            | 33 HS           |
| Sekir 2010                                            | Early H ISOK          | 26 | 26 | 0   | 24.8±7.2   | BTB             | Late H ISOK       | 22 | 22  | 0     | 25.1±5.3   | BTB             | 48  | 48  | 0     | NR                                  | 48 BTB          |
| <b>Early eccentric training</b>                       |                       |    |    |     |            |                 |                   |    |     |       |            |                 |     |     |       |                                     |                 |
| Gerber 2007a                                          | Early ECC             | 16 | 9  | 7   | 29.4±9.4   | 6 BTB<br>10 HS  | Usual care        | 16 | 9   | 7     | 31±9.8     | 6 BTB<br>10 HS  | 32  | 18  | 14    | NR                                  | 12 BTB<br>20 HS |
| Gerber 2007b                                          | Early ECC             | 20 | 12 | 8   | 29.3±8.6   | 10 BTB<br>10 HS | Usual care        | 20 | 12  | 8     | 29.3±9.7   | 10 BTB<br>10 HS | 40  | 24  | 16    | NR                                  | 20 BTB<br>20 HS |
| Gerber 2009                                           | Same as Gerber 2007b  |    |    |     |            |                 |                   |    |     |       |            |                 |     |     |       |                                     |                 |
|                                                       |                       |    |    |     |            |                 |                   |    |     |       |            | 682             | 465 | 217 |       | 293 BTB<br>371 HS<br>18<br>ALLO/BTB |                 |

### Strength training

|                                               | Resistance   |    |    |     |           | Controls     |            |    |     |       | Total     |        |    |     |       |           |                |
|-----------------------------------------------|--------------|----|----|-----|-----------|--------------|------------|----|-----|-------|-----------|--------|----|-----|-------|-----------|----------------|
|                                               | n            | M  | F  | age | graft     | n            | M          | F  | age | graft | n         | M      | F  | age | graft |           |                |
| <b>Open vs closed kinetic chain exercises</b> |              |    |    |     |           |              |            |    |     |       |           |        |    |     |       |           |                |
| Bynum 1995                                    | OKC          | 47 | 45 | 2   | 26        | BTB          | CKC        | 50 | 43  | 7     | 27        | BTB    | 97 | 88  | 9     | 97 BTB    |                |
| Morrissey 2000                                | OKC          | 18 | 17 | 1   | 28±9      | BTB          | CKC        | 18 | 12  | 6     | 31±8      | BTB    | 36 | 29  | 7     | 36 BTB    |                |
| Mikkelsen 2000                                | OKC+CKC      | 22 | 17 | 5   | NR        | BTB          | CKC        | 22 | 17  | 5     | NR        | BTB    | 44 | 34  | 10    | 18-40     | 44 BTB         |
| Hooper 2001                                   | OKC          | 19 | 16 | 3   | NR        | BTB          | CKC        | 18 | 13  | 5     | NR        | BTB    | 37 | 29  | 8     | NR        | 37 BTB         |
| Morrissey 2002                                | OKC          | 22 | 19 | 3   | 28±8      | BTB          | CKC        | 21 | 15  | 6     | 19±8      | BTB    | 43 | 34  | 9     | 43 BTB    |                |
| Perry 2005                                    | OKC          | 24 | 17 | 7   | 33±7      | BTB/HS       | CKC        | 25 | 20  | 5     | 33±8      | BTB/HS | 49 | 37  | 12    | 49 BTB/HS |                |
| Kang 2012                                     | OKC          | 18 | 12 | 6   | 29.9±2.3  | NR           | CKC        | 18 | 12  | 6     | 29±4      | NR     | 36 | 24  | 12    | 36 NR     |                |
| Chrzan 2013                                   | OKC          | 20 | NR | NR  | 27.3±8.5  | 18HS<br>2BTB | CKC        | 20 | NR  | NR    | 26.2±4.2  | 20HS   | 40 | 14  | 26    | 26.5      | 38 HS<br>2 BTB |
| Ucar 2014                                     | OKC          | 28 | 23 | 5   | 28.1±11.9 | HS           | CKC        | 30 | 24  | 6     | 27.4±10.5 | HS     | 58 | 47  | 11    | 58 HS     |                |
| <b>Eccentric training</b>                     |              |    |    |     |           |              |            |    |     |       |           |        |    |     |       |           |                |
| Friedmann-bette 2018                          | ECC overload | 21 | NR | NR  | 24±4      | QT/HS        | CON/ECC    | 16 | NR  | NR    | 26±5      | QT/HS  | 37 | NR  | NR    | 37 QT/HS  |                |
| Milandri 2021                                 | ECC          | 12 | 12 | 0   | 25.8±6.4  | HS           | CON        | 10 | 10  | 0     | 25.2±6    | HS     | 22 | 22  | 0     | 22 HS     |                |
| Kasmi 2021                                    | ECC          | 10 | 0  | 10  | 20.3±3.1  | BTB          | Usual care | 10 | 0   | 10    | 20.3±3.3  | BTB    | 20 | 0   | 20    | 20.3      | 20 BTB         |
| <b>Isokinetic training</b>                    |              |    |    |     |           |              |            |    |     |       |           |        |    |     |       |           |                |
| Tsaklis 2002                                  | ECC          | 15 | 15 | 0   | NR        | BTB          | CON        | 15 | 15  | 0     | NR        | BTB    | 30 | 30  | 0     | 25        | 30 BTB         |
| Vidmar 2020                                   | ISOK         | 15 | 15 | 0   | 26.9±5.8  | HS           | Control    | 15 | 15  | 0     | 24.3±4.6  | HS     | 30 | 30  | 0     | 30 HS     |                |

| Low intensity vs high intensity resistance training |                                   |    |    |    |          |               |                                    |    |    |   |          |               |            |            |                                                                                        |       |                 |
|-----------------------------------------------------|-----------------------------------|----|----|----|----------|---------------|------------------------------------|----|----|---|----------|---------------|------------|------------|----------------------------------------------------------------------------------------|-------|-----------------|
| <b>Bieler 2014</b>                                  | Low intensity resistance training | 26 | 16 | 10 | 29.2±1.1 | 14BTB<br>12HS | High intensity resistance training | 24 | 15 | 9 | 29.2±1.5 | 13BTB<br>11HS | 50         | 31         | 19                                                                                     | 18-45 | 27 BTB<br>23 HS |
|                                                     |                                   |    |    |    |          |               |                                    |    |    |   |          | <b>629</b>    | <b>449</b> | <b>143</b> | <b>336 BTB</b><br><b>171 HS</b><br><b>49 BTB/HS</b><br><b>37 QT/HS</b><br><b>36 NR</b> |       |                 |

## Motor control training

|                                                    | Intervention group                      | Intervention group |    |    |           |                      | graft                          | Control group | Control group |    |           |                      |            | graft     | Total                                                            |   |                          |     |  |
|----------------------------------------------------|-----------------------------------------|--------------------|----|----|-----------|----------------------|--------------------------------|---------------|---------------|----|-----------|----------------------|------------|-----------|------------------------------------------------------------------|---|--------------------------|-----|--|
|                                                    |                                         | n                  | M  | F  | age       |                      |                                |               | n             | M  | F         | age                  |            |           | n                                                                | M | F                        | age |  |
| <b>Motor control training</b>                      |                                         |                    |    |    |           |                      |                                |               |               |    |           |                      |            |           |                                                                  |   |                          |     |  |
| <b>Cappellino 2012</b>                             | Neurocognitive exercises                | 7                  | 7  | 0  | 27±6      | BTB                  | No neuro-cognitive exercises   | 7             | 7             | 0  | 28±4      | BTB                  | 14         | 14        | 0                                                                |   | 14 BTB                   |     |  |
| <b>Cho 2013</b>                                    | Unstable surface exercise               | 14                 | 14 | 0  | 28.8±7.2  | NR                   | Stable surface exercises       | 14            | 14            | 0  | 29.9±5.5  | NR                   | 28         | 28        | 0                                                                |   | 28 NR                    |     |  |
| <b>Kaya 2019</b>                                   | Neuromuscular exercises                 | 20                 | NR | NR | 29.4±9.7  | ALLO                 | No neuromuscular exercises     | 20            | NR            | NR | 31.6±8.5  | ALLO                 | 40         | 36        | 4                                                                |   | 40 ALLO                  |     |  |
| <b>Shen 2021</b>                                   | 15° treadmill angle backward walking    | 10                 | 6  | 4  | 32.9±11.5 | 3BTB<br>5HS<br>2ALLO | No backward walking            | 10            | 7             | 3  | 35.5±10.1 | 2BTB<br>7HS<br>1ALLO | 20         | 13        | 7                                                                |   | 5 BTB<br>12 HS<br>3 ALLO |     |  |
| <b>Hajouj 2021</b>                                 | Proprioception training                 | 15                 | 15 | 0  | 23.1±3.0  | HS                   | No proprioception training     | 15            | 15            | 0  | 24.3±3.7  | HS                   | 30         | 30        | 0                                                                |   | 30 HS                    |     |  |
| <b>Bartels 2016</b>                                | SpeedCourt system                       | 28                 | 22 | 6  | 31.4±7.5  | HS                   | Regular stabilization training | 22            | 14            | 8  | 34.4±12.5 | HS                   | 50         | 36        | 14                                                               |   | 50 HS                    |     |  |
| <b>Baltaci 2013</b>                                | Nintendo Wii Fit                        | 15                 | 15 | 0  | 28.6±6.8  | HS                   | Usual care                     | 15            | 15            | 0  | 29.3±5.7  | HS                   | 30         | 30        | 0                                                                |   | 30 HS                    |     |  |
| <b>Motor control training vs strength training</b> |                                         |                    |    |    |           |                      |                                |               |               |    |           |                      |            |           |                                                                  |   |                          |     |  |
| <b>Liu-ambrose 2003</b>                            | Balance, agility, perturbation training | 5                  | 1  | 4  | 25±3.7    | HS                   | Strength training              | 5             | 3             | 2  | 24.7±2.7  | HS                   | 10         | 4         | 6                                                                |   | 10 HS                    |     |  |
| <b>Cooper 2005</b>                                 | Balance training                        | 14                 | 12 | 2  | 31.3±7.8  | 18TB<br>13HS         | Strength training              | 15            | 8             | 7  | 24.7±5.1  | 28TB<br>13HS         | 29         | 20        | 9                                                                |   | 3 BTB<br>26 HS           |     |  |
|                                                    |                                         |                    |    |    |           |                      |                                |               |               |    |           | <b>251</b>           | <b>211</b> | <b>40</b> | <b>22 BTB</b><br><b>158 HS</b><br><b>43 ALLO</b><br><b>28 NR</b> |   |                          |     |  |

## Plyometric and agility training

|                                                            | Intervention group                     | Intervention group |    |    |          |               | graft                              | Control group | Control group |    |          |               |           | graft     | Total                                                          |       |              |     |  |
|------------------------------------------------------------|----------------------------------------|--------------------|----|----|----------|---------------|------------------------------------|---------------|---------------|----|----------|---------------|-----------|-----------|----------------------------------------------------------------|-------|--------------|-----|--|
|                                                            |                                        | n                  | M  | F  | age      |               |                                    |               | n             | M  | F        | age           |           |           | n                                                              | M     | F            | age |  |
| <b>Plyometric and agility training</b>                     |                                        |                    |    |    |          |               |                                    |               |               |    |          |               |           |           |                                                                |       |              |     |  |
| <b>Risberg 2007</b>                                        | Balance, plyometrics, agility training | 39                 | 26 | 13 | 27       | BTB           | Usual care                         | 35            | 21            | 14 | 28.5     | BTB           | 74        | 47        | 27                                                             |       | 74 BTB       |     |  |
| <b>Risberg 2009</b>                                        | Balance, plyometrics, agility training | 39                 | 26 | 13 | NR       | BTB           | Usual care                         | 35            | 21            | 14 | NR       | BTB           | 74        | 47        | 27                                                             |       | 74 BTB       |     |  |
| <b>Souissi 2011</b>                                        | Plyometric and agility training        | 8                  | 8  | 0  | 21.7±3   | NR            | Usual care                         | 8             | 8             | 0  | 21.5±4.1 | NR            | 16        | 16        | 0                                                              |       | 16 NR        |     |  |
| <b>Kasmi 2021</b>                                          | Plyometric training                    | 10                 | 0  | 10 | 20.3±3.4 | BTB           | Usual care                         | 10            | 0             | 10 | 20.3±3.1 | BTB           | 20        | 0         | 20                                                             |       | 20 BTB       |     |  |
| <b>Low intensity vs high intensity plyometric training</b> |                                        |                    |    |    |          |               |                                    |               |               |    |          |               |           |           |                                                                |       |              |     |  |
| <b>Chmielewski 2016</b>                                    | Low intensity plyometric training      | 12                 | 7  | 5  | 20.7±4.9 | AUTO/<br>ALLO | High intensity plyometric training | 12            | 8             | 4  | 19.3±3.8 | AUTO/<br>ALLO | 24        | 15        | 9                                                              | 15-30 | 24 AUTO/ALLO |     |  |
|                                                            |                                        |                    |    |    |          |               |                                    |               |               |    |          | <b>134</b>    | <b>78</b> | <b>56</b> | <b>94 BTB</b><br><b>16 NR</b><br><b>24</b><br><b>AUTO/ALLO</b> |       |              |     |  |



## Summary of critical and important outcomes

|                                    | ROM       | Swelling  | Laxity    | PROM     | Pain     | Balance   | Proprioception | Functional | Atrophy   | Strength  | RTS      |
|------------------------------------|-----------|-----------|-----------|----------|----------|-----------|----------------|------------|-----------|-----------|----------|
| <b>Pre-operative rehab</b>         |           |           | IMPORTANT | CRITICAL |          |           |                | IMPORTANT  | CRITICAL  | CRITICAL  | CRITICAL |
| <b>Unsupervised rehab</b>          | CRITICAL  |           | CRITICAL  | CRITICAL | CRITICAL |           | IMPORTANT      | IMPORTANT  | CRITICAL  | CRITICAL  |          |
| <b>Accelerated rehab</b>           |           |           | CRITICAL  | CRITICAL |          |           | IMPORTANT      | CRITICAL   |           | CRITICAL  |          |
| <b>CPM</b>                         | CRITICAL  | CRITICAL  | CRITICAL  | CRITICAL | CRITICAL |           | IMPORTANT      |            | IMPORTANT | IMPORTANT |          |
| <b>Cryotherapy</b>                 | CRITICAL  | CRITICAL  |           |          | CRITICAL |           |                |            |           |           |          |
| <b>Compressive cryotherapy</b>     | CRITICAL  | CRITICAL  |           | CRITICAL | CRITICAL |           |                | IMPORTANT  | IMPORTANT | IMPORTANT |          |
| <b>NMES</b>                        | IMPORTANT | IMPORTANT | CRITICAL  | CRITICAL | CRITICAL |           |                | IMPORTANT  | CRITICAL  | CRITICAL  |          |
| <b>Functional NMES</b>             |           |           | CRITICAL  |          | CRITICAL | IMPORTANT |                | IMPORTANT  | CRITICAL  | CRITICAL  |          |
| <b>EMG-Biofeedback</b>             | IMPORTANT | IMPORTANT |           | CRITICAL | CRITICAL |           |                |            |           | CRITICAL  |          |
| <b>BFR</b>                         | IMPORTANT | CRITICAL  | CRITICAL  | CRITICAL | CRITICAL | IMPORTANT |                |            | CRITICAL  | CRITICAL  |          |
| <b>Kinesio-tape</b>                | CRITICAL  | CRITICAL  |           | CRITICAL | CRITICAL | IMPORTANT |                | IMPORTANT  | IMPORTANT | IMPORTANT |          |
| <b>Dry needling</b>                | IMPORTANT |           |           | CRITICAL | CRITICAL | IMPORTANT |                |            |           |           |          |
| <b>Whole body vibration</b>        | IMPORTANT |           | CRITICAL  | CRITICAL |          | CRITICAL  | CRITICAL       | IMPORTANT  |           | CRITICAL  |          |
| <b>Local vibration</b>             | IMPORTANT |           |           | CRITICAL | CRITICAL | CRITICAL  |                | IMPORTANT  |           | CRITICAL  |          |
| <b>Early mobilization</b>          | CRITICAL  | CRITICAL  | CRITICAL  | CRITICAL | CRITICAL |           | IMPORTANT      | IMPORTANT  | IMPORTANT | IMPORTANT |          |
| <b>Immediate WB</b>                | CRITICAL  |           | CRITICAL  | CRITICAL | CRITICAL |           |                |            |           |           |          |
| <b>Early start OKC</b>             | CRITICAL  |           | CRITICAL  | CRITICAL | CRITICAL | IMPORTANT |                | IMPORTANT  |           | CRITICAL  |          |
| <b>Early isometric</b>             | CRITICAL  |           | CRITICAL  | CRITICAL | CRITICAL |           |                | IMPORTANT  |           | CRITICAL  |          |
| <b>Early leg press</b>             |           |           |           | CRITICAL |          |           |                | IMPORTANT  |           | CRITICAL  |          |
| <b>Early HSs isokinetic</b>        |           |           |           | CRITICAL |          |           |                |            |           | CRITICAL  |          |
| <b>Early ECC</b>                   |           | CRITICAL  | CRITICAL  | CRITICAL | CRITICAL |           |                | IMPORTANT  | CRITICAL  | CRITICAL  |          |
| <b>OKC vs CKC</b>                  | IMPORTANT |           | CRITICAL  | CRITICAL | CRITICAL |           |                | IMPORTANT  | CRITICAL  | CRITICAL  | CRITICAL |
| <b>Eccentric training</b>          |           |           |           | CRITICAL |          | IMPORTANT |                | IMPORTANT  |           | CRITICAL  |          |
| <b>Isokinetic vs isotonic</b>      |           |           |           | CRITICAL |          |           |                | IMPORTANT  | CRITICAL  | CRITICAL  |          |
| <b>Low vs high intensity</b>       |           |           | CRITICAL  | CRITICAL |          |           |                | IMPORTANT  |           | CRITICAL  |          |
| <b>Motor control vs usual care</b> | IMPORTANT | IMPORTANT | CRITICAL  | CRITICAL | CRITICAL | CRITICAL  | CRITICAL       | IMPORTANT  | CRITICAL  | CRITICAL  |          |
| <b>Motor control vs strength</b>   | IMPORTANT |           |           | CRITICAL |          |           |                | IMPORTANT  |           | CRITICAL  |          |
| <b>Plyometric/agility training</b> |           |           | CRITICAL  | CRITICAL | CRITICAL | IMPORTANT | IMPORTANT      | CRITICAL   |           | CRITICAL  |          |
| <b>Cross education</b>             |           |           |           | CRITICAL |          | IMPORTANT | IMPORTANT      | IMPORTANT  |           | CRITICAL  |          |
| <b>Core stability training</b>     | IMPORTANT |           |           | CRITICAL | CRITICAL |           |                | IMPORTANT  |           |           |          |
| <b>Aquatic therapy</b>             | CRITICAL  | CRITICAL  | CRITICAL  | CRITICAL | CRITICAL | IMPORTANT | IMPORTANT      | IMPORTANT  | CRITICAL  | CRITICAL  |          |

## Risk of Bias assessment

| Outcome / Author                                                                                                                                                                                                                                       | D1 | D2 | D3 | D4 | D5 | Overall |
|--------------------------------------------------------------------------------------------------------------------------------------------------------------------------------------------------------------------------------------------------------|----|----|----|----|----|---------|
| <b>Pre-operative rehabilitation</b>                                                                                                                                                                                                                    |    |    |    |    |    |         |
| <b>Strength</b>                                                                                                                                                                                                                                        |    |    |    |    |    |         |
| Shaarani 2013                                                                                                                                                                                                                                          | !  | !  | -  | -  | -  | -       |
| Kim 2015                                                                                                                                                                                                                                               | !  | -  | -  | -  | !  | -       |
| <b>Atrophy</b>                                                                                                                                                                                                                                         |    |    |    |    |    |         |
| Shaarani 2013                                                                                                                                                                                                                                          | !  | !  | -  | +  | -  | -       |
| <b>Functional activities</b>                                                                                                                                                                                                                           |    |    |    |    |    |         |
| Shaarani 2013                                                                                                                                                                                                                                          | !  | !  | -  | -  | !  | -       |
| Kim 2015                                                                                                                                                                                                                                               | !  | -  | -  | -  | !  | -       |
| <b>Patient reported outcomes</b>                                                                                                                                                                                                                       |    |    |    |    |    |         |
| Shaarani 2013                                                                                                                                                                                                                                          | !  | !  | -  | -  | !  | -       |
| Reddy 2020                                                                                                                                                                                                                                             | !  | -  | -  | -  | !  | -       |
| <b>Return to sport</b>                                                                                                                                                                                                                                 |    |    |    |    |    |         |
| Shaarani 2013                                                                                                                                                                                                                                          | !  | !  | -  | -  | !  | -       |
| <b>Laxity</b>                                                                                                                                                                                                                                          |    |    |    |    |    |         |
| Reddy 2020                                                                                                                                                                                                                                             | !  | -  | -  | !  | !  | -       |
| <ul style="list-style-type: none"> <li><span style="color: green;">+</span> Low risk</li> <li><span style="color: yellow;">!</span> Some concerns</li> <li><span style="color: red;">-</span> High risk</li> </ul>                                     |    |    |    |    |    |         |
| <ul style="list-style-type: none"> <li>D1 Randomisation process</li> <li>D2 Deviations from the intended interventions</li> <li>D3 Missing outcome data</li> <li>D4 Measurement of the outcome</li> <li>D5 Selection of the reported result</li> </ul> |    |    |    |    |    |         |
| <b>Perturbation in pre-rehabilitation</b>                                                                                                                                                                                                              |    |    |    |    |    |         |
| <b>Strength</b>                                                                                                                                                                                                                                        |    |    |    |    |    |         |
| Hartigen 2010                                                                                                                                                                                                                                          | !  | -  | !  | -  | !  | -       |
| <b>Patient reported outcomes</b>                                                                                                                                                                                                                       |    |    |    |    |    |         |
| Hartigen 2010                                                                                                                                                                                                                                          | !  | -  | !  | -  | !  | -       |
| <b>Functional activities</b>                                                                                                                                                                                                                           |    |    |    |    |    |         |
| Hartigen 2009                                                                                                                                                                                                                                          | !  | -  | -  | -  | -  | -       |
| Hartigen 2010                                                                                                                                                                                                                                          | !  | -  | !  | -  | !  | -       |
| <b>Unsupervised exercise execution</b>                                                                                                                                                                                                                 |    |    |    |    |    |         |
| <b>Strength</b>                                                                                                                                                                                                                                        |    |    |    |    |    |         |
| Grant 2005                                                                                                                                                                                                                                             | +  | +  | +  | +  | !  | !       |
| Revenas 2009                                                                                                                                                                                                                                           | !  | !  | -  | +  | !  | -       |
| Grant 2010                                                                                                                                                                                                                                             | +  | +  | +  | +  | !  | !       |
| Hohmann 2011                                                                                                                                                                                                                                           | +  | +  | +  | +  | !  | !       |
| Lim 2019                                                                                                                                                                                                                                               | !  | -  | +  | +  | !  | -       |
| Beard 1998                                                                                                                                                                                                                                             | !  | !  | +  | +  | !  | !       |
| <b>Range of motion</b>                                                                                                                                                                                                                                 |    |    |    |    |    |         |
| Schenck 1997                                                                                                                                                                                                                                           | !  | -  | +  | +  | !  | -       |
| Fischer 1998                                                                                                                                                                                                                                           | !  | -  | +  | -  | !  | -       |
| Grant 2005                                                                                                                                                                                                                                             | +  | +  | +  | +  | !  | !       |
| Ugutmen 2008                                                                                                                                                                                                                                           | !  | -  | +  | -  | !  | -       |
| Revenas 2009                                                                                                                                                                                                                                           | !  | !  | -  | +  | !  | -       |
| Grant 2010                                                                                                                                                                                                                                             | +  | +  | +  | +  | !  | !       |
| <b>Patient reported outcomes</b>                                                                                                                                                                                                                       |    |    |    |    |    |         |
| Schenck 1997                                                                                                                                                                                                                                           | !  | -  | +  | !  | !  | -       |
| Beard 1998                                                                                                                                                                                                                                             | !  | !  | +  | !  | !  | !       |
| Fischer 1998                                                                                                                                                                                                                                           | !  | -  | +  | !  | !  | -       |
| Grant 2005                                                                                                                                                                                                                                             | +  | +  | +  | !  | !  | !       |
| Ugutmen 2008                                                                                                                                                                                                                                           | !  | -  | +  | !  | !  | -       |
| Revenas 2009                                                                                                                                                                                                                                           | !  | !  | -  | !  | !  | -       |
| Grant 2010                                                                                                                                                                                                                                             | +  | +  | +  | !  | !  | !       |
| Hohmann 2011                                                                                                                                                                                                                                           | +  | +  | +  | !  | !  | !       |

| Functional activities |   |   |   |   |   |   |
|-----------------------|---|---|---|---|---|---|
| Schenck 1997          | ! | - | + | + | ! | - |
| Fischer 1998          | ! | - | + | ! | ! | - |
| Revenas 2009          | ! | ! | - | + | ! | - |
| Hohmann 2011          | + | + | + | + | ! | ! |
| Laxity                |   |   |   |   |   |   |
| Schenck 1997          | ! | - | + | + | ! | - |
| Beard 1998            | ! | ! | + | + | ! | ! |
| Fischer 1998          | ! | - | + | + | ! | - |
| Grant 2005            | + | + | + | + | ! | ! |
| Ugutmen 2008          | ! | - | + | - | ! | - |
| Grant 2010            | + | + | + | + | ! | ! |
| Proprioception        |   |   |   |   |   |   |
| Lim 2019              | ! | - | + | + | ! | - |
| Pain                  |   |   |   |   |   |   |
| Schenck 1997          | ! | - | + | ! | ! | - |
| Atrophy               |   |   |   |   |   |   |
| Fischer 1998          | ! | - | + | - | ! | - |
| Chen 2021             | ! | - | ! | ! | ! | - |
| Ugutmen 2008          | ! | - | + | - | ! | - |

- + Low risk
  - ! Some concerns
  - High risk
- D1 Randomisation process
  - D2 Deviations from the intended interventions
  - D3 Missing outcome data
  - D4 Measurement of the outcome
  - D5 Selection of the reported result

**Lateral slide exercise - unsupervised**

| Outcome / Author      | D1 | D2 | D3 | D4 | D5 | Overall |
|-----------------------|----|----|----|----|----|---------|
| Strength              |    |    |    |    |    |         |
| Blanpied 2000         | !  | +  | +  | +  | !  | !       |
| Functional activities |    |    |    |    |    |         |
| Blanpied 2000         | !  | +  | +  | +  | !  | !       |

**Rehabilitation duration**

| Outcome / Author          | D1 | D2 | D3 | D4 | D5 | Overall |
|---------------------------|----|----|----|----|----|---------|
| Laxity                    |    |    |    |    |    |         |
| Beynnon 2011              | !  | -  | !  | +  | !  | -       |
| Gupta 2017                | !  | -  | -  | -  | !  | -       |
| Patient reported outcomes |    |    |    |    |    |         |
| Beynnon 2011              | !  | -  | !  | +  | !  | -       |
| Gupta 2017                | !  | -  | -  | -  | !  | -       |
| Strength                  |    |    |    |    |    |         |
| Beynnon 2011              | !  | -  | !  | +  | !  | -       |
| Functional activities     |    |    |    |    |    |         |
| Beynnon 2011              | !  | -  | !  | +  | !  | -       |
| Gupta 2017                | !  | -  | -  | -  | !  | -       |
| Proprioception            |    |    |    |    |    |         |
| Beynnon 2011              | !  | -  | !  | +  | !  | -       |

**Continuous passive motion (CPM) versus no CPM**

| Outcome / Author | D1 | D2 | D3 | D4 | D5 | Overall |
|------------------|----|----|----|----|----|---------|
| Range of motion  |    |    |    |    |    |         |
| Yates 1992       | !  | -  | -  | -  | !  | -       |
| Anderson 1989    | !  | -  | +  | !  | -  | -       |
| Swelling         |    |    |    |    |    |         |
| Yates 1992       | !  | -  | -  | -  | !  | -       |
| Anderson 1989    | !  | -  | +  | -  | -  | -       |
| Atrophy          |    |    |    |    |    |         |
| Yates 1992       | !  | -  | -  | -  | !  | -       |
| Anderson 1989    | !  | -  | +  | !  | -  | -       |

| Outcome / Author             | D1 | D2 | D3 | D4 | D5 | Overall |
|------------------------------|----|----|----|----|----|---------|
| <b>Strength</b>              |    |    |    |    |    |         |
| Anderson 1989                | !  | !  | +  | !  | !  | !       |
| <b>Pain</b>                  |    |    |    |    |    |         |
| McCarthy 1993b               | !  | !  | !  | !  | !  | !       |
| Yates 1992                   | !  | !  | !  | !  | !  | !       |
| <b>Pain - Medication use</b> |    |    |    |    |    |         |
| McCarthy 1993b               | !  | !  | !  | !  | !  | !       |
| Yates 1992                   | !  | !  | !  | !  | !  | !       |
| <b>Laxity</b>                |    |    |    |    |    |         |
| McCarthy 1993a               | !  | !  | !  | !  | !  | !       |
| Anderson 1989                | !  | !  | +  | !  | !  | !       |
| <b>Atrophy</b>               |    |    |    |    |    |         |
| Yates 1992                   | !  | !  | !  | !  | !  | !       |
| Anderson 1989                | !  | !  | +  | !  | !  | !       |
| <b>Strength</b>              |    |    |    |    |    |         |
| Anderson 1989                | !  | !  | +  | !  | !  | !       |

- + Low risk
  - ! Some concerns
  - ! High risk
- D1 Randomisation process
  - D2 Deviations from the intended interventions
  - D3 Missing outcome data
  - D4 Measurement of the outcome
  - D5 Selection of the reported result

CPM vs active motion

| Outcome / Author                 | D1 | D2 | D3 | D4 | D5 | Overall |
|----------------------------------|----|----|----|----|----|---------|
| <b>Range of motion</b>           |    |    |    |    |    |         |
| Rosen 1992                       | !  | !  | !  | !  | !  | !       |
| Engstrom 1995                    | !  | !  | !  | !  | !  | !       |
| Friemert 2006                    | !  | !  | !  | !  | !  | !       |
| <b>Swelling</b>                  |    |    |    |    |    |         |
| Friemert 2006                    | !  | !  | !  | !  | !  | !       |
| Engstrom 1995                    | !  | !  | !  | !  | !  | !       |
| <b>Pain</b>                      |    |    |    |    |    |         |
| Friemert 2006                    | !  | !  | !  | !  | !  | !       |
| <b>Laxity</b>                    |    |    |    |    |    |         |
| Rosen 1992                       | !  | !  | !  | !  | !  | !       |
| <b>Atrophy</b>                   |    |    |    |    |    |         |
| Engstrom 1995                    | !  | !  | !  | !  | !  | !       |
| <b>Patient reported outcomes</b> |    |    |    |    |    |         |
| Rosen 1992                       | !  | !  | !  | !  | !  | !       |
| <b>Proprioception</b>            |    |    |    |    |    |         |
| Friemert 2006                    | !  | !  | !  | !  | !  | !       |

Long vs short CPM use

| Outcome / Author       | D1 | D2 | D3 | D4 | D5 | Overall |
|------------------------|----|----|----|----|----|---------|
| <b>Range of motion</b> |    |    |    |    |    |         |
| Richmond 1991          | !  | !  | !  | +  | !  | !       |
| <b>Swelling</b>        |    |    |    |    |    |         |
| Richmond 1991          | !  | !  | !  | +  | !  | !       |
| <b>Laxity</b>          |    |    |    |    |    |         |
| Richmond 1991          | !  | !  | !  | +  | !  | !       |

Cryotherapy vs no cryotherapy

| Outcome / Author             | D1 | D2 | D3 | D4 | D5 | Overall |
|------------------------------|----|----|----|----|----|---------|
| <b>Pain - Medication use</b> |    |    |    |    |    |         |
| Cohn 1989                    | !  | !  | +  | !  | !  | !       |
| Daniel 1994                  | !  | !  | !  | !  | !  | !       |
| Brandsoon 1996               | !  | +  | +  | !  | !  | !       |
| Konrath 1996                 | !  | !  | !  | !  | !  | !       |
| Edwards 1996                 | !  | !  | !  | !  | !  | !       |
| Barber 1998                  | !  | +  | !  | !  | !  | !       |
| Dervin 1998                  | !  | !  | !  | !  | !  | !       |
| Ohkoshi 1999                 | !  | !  | +  | !  | !  | !       |
| Koyonos 2014                 | !  | +  | +  | !  | !  | !       |

Compressive cryotherapy versus cryotherapy

| Outcome / Author                 | D1 | D2 | D3 | D4 | D5 | Overall |
|----------------------------------|----|----|----|----|----|---------|
| <b>Pain - VAS</b>                |    |    |    |    |    |         |
| Daniel 1994                      | ⊖  | ⊖  | ⊖  | ⊖  | ⚠  | ⊖       |
| Brandsoon 1996                   | ⚠  | ⊖  | ⊕  | ⊕  | ⚠  | ⊖       |
| Edwards 1996                     | ⚠  | ⊖  | ⊖  | ⊖  | ⚠  | ⊖       |
| Barber 1998                      | ⚠  | ⊕  | ⊖  | ⊖  | ⊖  | ⊖       |
| Dervin 1998                      | ⚠  | ⊖  | ⊖  | ⚠  | ⚠  | ⊖       |
| Ohkoshi 1999                     | ⊖  | ⊖  | ⊕  | ⊖  | ⚠  | ⊖       |
| Koyonos 2014                     | ⚠  | ⊕  | ⊕  | ⊖  | ⚠  | ⊖       |
| <b>Swelling</b>                  |    |    |    |    |    |         |
| Daniel 1994                      | ⊖  | ⊖  | ⊖  | ⊖  | ⚠  | ⊖       |
| Barber 1998                      | ⚠  | ⊕  | ⊖  | ⊖  | ⚠  | ⊖       |
| Edwards 1996                     | ⚠  | ⊖  | ⊖  | ⚠  | ⚠  | ⊖       |
| Dervin 1998                      | ⚠  | ⊖  | ⊖  | ⊖  | ⚠  | ⊖       |
| Ohkoshi 1999                     | ⊖  | ⊖  | ⊕  | ⚠  | ⚠  | ⊖       |
| Konrath 1996                     | ⊖  | ⊖  | ⊖  | ⊖  | ⚠  | ⊖       |
| <b>Range of motion</b>           |    |    |    |    |    |         |
| Daniel 1994                      | ⊖  | ⊖  | ⊖  | ⊖  | ⚠  | ⊖       |
| Edwards 1996                     | ⚠  | ⊖  | ⊖  | ⚠  | ⚠  | ⊖       |
| Barber 1998                      | ⚠  | ⊖  | ⊖  | ⊖  | ⚠  | ⊖       |
| Konrath 1996                     | ⊖  | ⊖  | ⊖  | ⊖  | ⚠  | ⊖       |
| Ohkoshi 1999                     | ⊖  | ⊖  | ⊕  | ⊖  | ⚠  | ⊖       |
| <b>Pain - Medication use</b>     |    |    |    |    |    |         |
| Kijkunasathian 2017              | ⊕  | ⊕  | ⊕  | ⚠  | ⚠  | ⚠       |
| Schroder 1994                    | ⚠  | ⊖  | ⊖  | ⚠  | ⚠  | ⊖       |
| Waterman 2011                    | ⚠  | ⊕  | ⊖  | ⊖  | ⊖  | ⊖       |
| Ruffilli 2015                    | ⚠  | ⊕  | ⊕  | ⊖  | ⚠  | ⊖       |
| <b>Pain</b>                      |    |    |    |    |    |         |
| Dambros 2012                     | ⊕  | ⊖  | ⊖  | ⊖  | ⚠  | ⊖       |
| Kijkunasathian 2017              | ⊕  | ⊕  | ⊕  | ⊖  | ⚠  | ⊖       |
| Ruffilli 2015                    | ⚠  | ⊕  | ⊕  | ⊖  | ⚠  | ⊖       |
| Schroder 1994                    | ⚠  | ⊖  | ⊖  | ⊖  | ⚠  | ⊖       |
| Waterman 2011                    | ⚠  | ⊖  | ⊖  | ⚠  | ⚠  | ⊖       |
| <b>Range of motion</b>           |    |    |    |    |    |         |
| Schroder 1994                    | ⚠  | ⊖  | ⊖  | ⊖  | ⚠  | ⊖       |
| Dambros 2012                     | ⊕  | ⊕  | ⊖  | ⊖  | ⚠  | ⊖       |
| Kijkunasathian 2017              | ⊕  | ⊕  | ⊕  | ⚠  | ⚠  | ⚠       |
| Ruffilli 2015                    | ⚠  | ⊕  | ⊕  | ⊖  | ⚠  | ⊖       |
| <b>Swelling</b>                  |    |    |    |    |    |         |
| Kijkunasathian 2017              | ⊕  | ⊕  | ⊕  | ⊖  | ⚠  | ⊖       |
| Ruffilli 2015                    | ⚠  | ⊕  | ⊕  | ⊖  | ⚠  | ⊖       |
| Schroder 1994                    | ⚠  | ⊖  | ⊖  | ⊖  | ⚠  | ⊖       |
| Waterman 2011                    | ⚠  | ⊕  | ⊖  | ⊖  | ⚠  | ⊖       |
| <b>Patient reported outcomes</b> |    |    |    |    |    |         |
| Waterman 2011                    | ⚠  | ⊕  | ⊖  | ⚠  | ⚠  | ⊖       |
| Kijkunasathian 2017              | ⊕  | ⊕  | ⊕  | ⊖  | ⚠  | ⊖       |
| Ruffilli 2015                    | ⚠  | ⊕  | ⊕  | ⊖  | ⚠  | ⊖       |
| <b>Atrophy</b>                   |    |    |    |    |    |         |
| Schroder 1994                    | ⚠  | ⊖  | ⊖  | ⊖  | ⚠  | ⊖       |
| Ruffilli 2015                    | ⚠  | ⊕  | ⊕  | ⊖  | ⚠  | ⊖       |
| <b>Strength</b>                  |    |    |    |    |    |         |
| Schroder 1994                    | ⚠  | ⊖  | ⊖  | ⊖  | ⚠  | ⊖       |
| <b>Functional activities</b>     |    |    |    |    |    |         |
| Kijkunasathian 2017              | ⊕  | ⊕  | ⊕  | ⚠  | ⚠  | ⚠       |

⊕ Low risk  
⚠ Some concerns  
⊖ High risk  
 D1 Randomisation process  
 D2 Deviations from the intended interventions  
 D3 Missing outcome data  
 D4 Measurement of the outcome  
 D5 Selection of the reported result

| Outcome / Author                                                  | D1 | D2 | D3 | D4 | D5 | Overall |
|-------------------------------------------------------------------|----|----|----|----|----|---------|
| <b>Neuromuscular electrical Stimulation (NMES) versus no NMES</b> |    |    |    |    |    |         |
| <b>Strength</b>                                                   |    |    |    |    |    |         |
| Sisk 1987                                                         | !  | -  | +  | +  | !  | -       |
| Delitto 1988                                                      | !  | -  | +  | +  | !  | -       |
| Wigerstad-Lossing 1988                                            | !  | -  | +  | +  | !  | -       |
| Snyder-Mackler 1991                                               | !  | +  | +  | +  | !  | !       |
| Snyder-Mackler 1995                                               | !  | +  | -  | +  | !  | -       |
| Lieber 1996                                                       | !  | +  | +  | -  | !  | -       |
| Paternostro-Sluga 1999                                            | !  | +  | +  | +  | !  | !       |
| Fitzgerald 2003                                                   | -  | !  | +  | +  | !  | -       |
| Hasegawa 2011                                                     | !  | !  | +  | +  | !  | !       |
| Feil 2011                                                         | !  | !  | +  | +  | !  | !       |
| Taradaj 2013                                                      | +  | +  | +  | +  | +  | +       |
| Toth 2020                                                         | -  | +  | +  | +  | !  | -       |
| <b>Atrophy</b>                                                    |    |    |    |    |    |         |
| Wigerstad-Lossing 1988                                            | !  | -  | +  | +  | !  | -       |
| Hasegawa 2011                                                     | !  | !  | +  | +  | !  | !       |
| Taradaj 2013                                                      | +  | +  | +  | +  | +  | +       |
| Wright 2019                                                       | -  | !  | +  | !  | !  | -       |
| Toth 2020                                                         | -  | +  | +  | +  | !  | -       |
| Ediz 2012                                                         | +  | +  | +  | +  | !  | !       |
| <b>Pain</b>                                                       |    |    |    |    |    |         |
| Fitzgerald 2003                                                   | -  | !  | +  | -  | !  | -       |
| Ediz 2012                                                         | +  | +  | +  | -  | !  | -       |
| <b>Range of motion</b>                                            |    |    |    |    |    |         |
| Toth 2020                                                         | -  | +  | +  | +  | !  | -       |
| Ediz 2012                                                         | +  | +  | +  | +  | !  | !       |
| <b>Patient reported outcomes</b>                                  |    |    |    |    |    |         |
| Fitzgerald 2003                                                   | -  | !  | +  | -  | !  | -       |
| Hasegawa 2011                                                     | !  | !  | +  | -  | !  | -       |
| Feil 2011                                                         | !  | !  | +  | -  | !  | -       |
| Toth 2020                                                         | -  | +  | +  | -  | !  | -       |
| Ediz 2012                                                         | +  | +  | +  | -  | !  | -       |
| <b>Functional activities</b>                                      |    |    |    |    |    |         |
| Snyder-Mackler 1991                                               | !  | +  | +  | +  | !  | !       |
| Feil 2011                                                         | !  | !  | +  | +  | !  | !       |
| Toth 2020                                                         | -  | +  | +  | +  | !  | -       |
| Fitzgerald 2003                                                   | -  | !  | +  | +  | !  | -       |
| <b>Laxity</b>                                                     |    |    |    |    |    |         |
| Snyder-Mackler 1991                                               | !  | +  | +  | +  | !  | !       |
| Feil 2011                                                         | !  | !  | +  | +  | !  | !       |
| <b>Swelling</b>                                                   |    |    |    |    |    |         |
| Ediz 2012                                                         | +  | +  | +  | +  | !  | !       |
| <b>Functional NMES versus no functional NMES</b>                  |    |    |    |    |    |         |
| <b>Strength</b>                                                   |    |    |    |    |    |         |
| Labanca 2018                                                      | !  | +  | !  | +  | !  | !       |
| Moran 2019                                                        | -  | -  | -  | +  | !  | -       |
| <b>Functional activities</b>                                      |    |    |    |    |    |         |
| Ross 2000                                                         | !  | -  | +  | +  | !  | -       |
| Labanca 2018                                                      | !  | +  | !  | +  | !  | !       |
| Moran 2019                                                        | -  | -  | -  | +  | !  | -       |
| <b>Laxity</b>                                                     |    |    |    |    |    |         |
| Ross 2000                                                         | !  | -  | +  | +  | !  | -       |
| <b>Pain</b>                                                       |    |    |    |    |    |         |
| Labanca 2018                                                      | !  | +  | !  | -  | !  | -       |

+ Low risk  
! Some concerns  
- High risk

D1 Randomisation process  
 D2 Deviations from the intended interventions  
 D3 Missing outcome data  
 D4 Measurement of the outcome  
 D5 Selection of the reported result

|                                  |  | D1 | D2 | D3 | D4 | D5 | Overall |
|----------------------------------|--|----|----|----|----|----|---------|
| <b>Atrophy</b>                   |  |    |    |    |    |    |         |
| Labanca 2018                     |  | !  | +  | !  | +  | !  | !       |
| <b>Balance</b>                   |  |    |    |    |    |    |         |
| Ross 2000                        |  | !  | -  | +  | +  | !  | -       |
|                                  |  |    |    |    |    |    |         |
| <b>Strength</b>                  |  |    |    |    |    |    |         |
| Draper 1990                      |  | -  | -  | +  | !  | !  | -       |
| <b>Range of motion</b>           |  |    |    |    |    |    |         |
| Draper 1990                      |  | -  | -  | +  | !  | !  | -       |
| Christanelli 2012                |  | -  | !  | +  | +  | !  | -       |
| <b>Patient reported outcomes</b> |  |    |    |    |    |    |         |
| Christanelli 2012                |  | -  | !  | +  | -  | !  | -       |
| <b>Pain</b>                      |  |    |    |    |    |    |         |
| Christanelli 2012                |  | -  | !  | +  | -  | !  | -       |
| <b>Swelling</b>                  |  |    |    |    |    |    |         |
| Christanelli 2012                |  | -  | !  | +  | +  | !  | -       |

  

|                                  |  | D1 | D2 | D3 | D4 | D5 | Overall |
|----------------------------------|--|----|----|----|----|----|---------|
| <b>Strength</b>                  |  |    |    |    |    |    |         |
| Ohta 2003                        |  | -  | +  | +  | !  | !  | -       |
| Hughes 2019a                     |  | +  | !  | +  | +  | +  | !       |
| Curran 2020                      |  | +  | -  | +  | +  | +  | -       |
| <b>Atrophy</b>                   |  |    |    |    |    |    |         |
| Ohta 2003                        |  | -  | +  | +  | !  | -  | -       |
| Iversen 2016                     |  | !  | +  | +  | +  | !  | -       |
| Hughes 2019a                     |  | +  | !  | +  | +  | +  | !       |
| Curran 2020                      |  | +  | -  | +  | +  | +  | -       |
| <b>Pain</b>                      |  |    |    |    |    |    |         |
| Hughes 2019b                     |  | +  | +  | +  | -  | !  | -       |
| <b>Patient reported outcomes</b> |  |    |    |    |    |    |         |
| Curran 2020                      |  | +  | -  | +  | -  | +  | -       |
| Hughes 2019a                     |  | +  | !  | +  | -  | +  | -       |
| <b>Range of motion</b>           |  |    |    |    |    |    |         |
| Ohta 2003                        |  | -  | +  | +  | !  | !  | -       |
| Hughes 2019a                     |  | +  | !  | +  | +  | +  | !       |
| <b>Balance</b>                   |  |    |    |    |    |    |         |
| Hughes 2019a                     |  | +  | !  | +  | +  | +  | !       |
| <b>Laxity</b>                    |  |    |    |    |    |    |         |
| Ohta 2003                        |  | -  | +  | +  | !  | !  | -       |
| Hughes 2019a                     |  | +  | !  | +  | +  | +  | !       |
| <b>Swelling</b>                  |  |    |    |    |    |    |         |
| Hughes 2019a                     |  | +  | !  | +  | +  | +  | !       |

  

|                   |  | D1 | D2 | D3 | D4 | D5 | Overall |
|-------------------|--|----|----|----|----|----|---------|
| <b>Strength</b>   |  |    |    |    |    |    |         |
| Grapar Zargi 2016 |  | -  | +  | !  | +  | !  | -       |
| Zargi 2018        |  | !  | +  | +  | +  | !  | !       |
| <b>Atrophy</b>    |  |    |    |    |    |    |         |
| Grapar Zargi 2016 |  | -  | +  | !  | +  | !  | -       |
| <b>Balance</b>    |  |    |    |    |    |    |         |
| Grapar Zargi 2016 |  | -  | +  | !  | +  | !  | -       |

+ Low risk  
! Some concerns  
- High risk

D1 Randomisation process  
 D2 Deviations from the intended interventions  
 D3 Missing outcome data  
 D4 Measurement of the outcome  
 D5 Selection of the reported result

| Outcome / Author                           | D1 | D2 | D3 | D4 | D5 | Overall |
|--------------------------------------------|----|----|----|----|----|---------|
| <b>Kinesio-tape versus no kinesio-tape</b> |    |    |    |    |    |         |
| <b>Pain</b>                                |    |    |    |    |    |         |
| Boguszewski 2013                           | !  | -  | -  | -  | -  | -       |
| Balki 2016                                 | !  | -  | +  | +  | !  | -       |
| Chan 2016                                  | !  | -  | !  | -  | -  | -       |
| <b>Swelling</b>                            |    |    |    |    |    |         |
| Boguszewski 2013                           | !  | -  | -  | -  | !  | -       |
| Balki 2016                                 | !  | +  | +  | +  | !  | -       |
| Chan 2016                                  | !  | +  | !  | -  | -  | -       |
| <b>Strength</b>                            |    |    |    |    |    |         |
| Balki 2016                                 | !  | -  | +  | -  | !  | -       |
| Oliveira 2016                              | -  | -  | +  | !  | !  | -       |
| Balki 2019                                 | !  | +  | +  | +  | -  | -       |
| <b>Range of motion</b>                     |    |    |    |    |    |         |
| Boguszewski 2013                           | !  | -  | -  | -  | !  | -       |
| Balki 2016                                 | !  | -  | +  | +  | !  | -       |
| Chan 2016                                  | !  | +  | !  | -  | -  | -       |
| <b>Patient reported outcomes</b>           |    |    |    |    |    |         |
| Balki 2016                                 | !  | -  | +  | +  | !  | -       |
| Chan 2016                                  | !  | +  | !  | -  | -  | -       |
| Gholami 2020                               | +  | -  | +  | +  | !  | -       |
| <b>Balance</b>                             |    |    |    |    |    |         |
| Oliveira 2016                              | -  | -  | +  | -  | !  | -       |
| Gholami 2020                               | +  | +  | +  | +  | !  | !       |
| <b>Atrophy</b>                             |    |    |    |    |    |         |
| Boguszewski 2013                           | !  | -  | -  | -  | !  | -       |
| <b>Functional activities</b>               |    |    |    |    |    |         |
| Gholami 2020                               | +  | +  | +  | +  | !  | !       |

+ Low risk  
! Some concerns  
- High risk

D1 Randomisation process  
 D2 Deviations from the intended interventions  
 D3 Missing outcome data  
 D4 Measurement of the outcome  
 D5 Selection of the reported result

| Outcome / Author                           | D1 | D2 | D3 | D4 | D5 | Overall |
|--------------------------------------------|----|----|----|----|----|---------|
| <b>Dry needling versus no dry needling</b> |    |    |    |    |    |         |
| <b>Pain</b>                                |    |    |    |    |    |         |
| Velázquez-Saornil 2017                     | !  | -  | +  | -  | !  | -       |
| <b>Patient reported outcomes</b>           |    |    |    |    |    |         |
| Velázquez-Saornil 2017                     | !  | -  | +  | -  | !  | -       |
| <b>Range of motion</b>                     |    |    |    |    |    |         |
| Velázquez-Saornil 2017                     | !  | -  | +  | +  | !  | -       |
| <b>Balance</b>                             |    |    |    |    |    |         |
| Velázquez-Saornil 2017                     | !  | -  | +  | +  | !  | -       |

| Outcome / Author                                    | D1 | D2 | D3 | D4 | D5 | Overall |
|-----------------------------------------------------|----|----|----|----|----|---------|
| <b>Whole-body vibration (WBV) versus usual care</b> |    |    |    |    |    |         |
| <b>Strength</b>                                     |    |    |    |    |    |         |
| Berschlin 2014                                      | !  | +  | +  | +  | !  | !       |
| Pistone 2016                                        | !  | +  | +  | +  | !  | !       |
| Costantino 2018                                     | !  | +  | +  | +  | !  | !       |
| Dacosta 2019                                        | +  | +  | +  | +  | +  | +       |
| Salvarani 2003                                      | !  | -  | +  | +  | !  | -       |
| Fu 2013                                             | !  | +  | +  | +  | !  | !       |
| <b>Proprioception</b>                               |    |    |    |    |    |         |
| Moezy 2008                                          | !  | +  | +  | +  | !  | !       |
| Fu 2013                                             | !  | +  | +  | +  | !  | !       |
| <b>Balance</b>                                      |    |    |    |    |    |         |
| Moezy 2008                                          | !  | +  | +  | +  | !  | !       |
| Fu 2013                                             | !  | +  | +  | +  | !  | !       |
| Berschlin 2014                                      | !  | +  | +  | +  | !  | !       |
| Pistone 2016                                        | !  | +  | +  | +  | !  | !       |
| Dacosta 2019                                        | +  | +  | +  | +  | +  | +       |

| Patient reported outcomes |   |   |   |   |   |   |
|---------------------------|---|---|---|---|---|---|
| Berschlin 2014            | ! | + | + | - | ! | - |
| Pistone 2016              | ! | + | + | - | ! | - |
| Functional                |   |   |   |   |   |   |
| Fu 2013                   | ! | + | + | + | ! | ! |
| Range of motion           |   |   |   |   |   |   |
| Berschlin 2014            | ! | + | + | + | ! | ! |
| Laxity                    |   |   |   |   |   |   |
| Fu 2013                   | ! | + | + | + | ! | ! |
| Berschlin 2014            | ! | + | + | + | ! | ! |

● Low risk

! Some concerns

● High risk

D1 Randomisation process

D2 Deviations from the intended interventions

D3 Missing outcome data

D4 Measurement of the outcome

D5 Selection of the reported result

Local vibration versus no local vibration

| Outcome / Author          | D1 | D2 | D3 | D4 | D5 | Overall |
|---------------------------|----|----|----|----|----|---------|
| Balance                   |    |    |    |    |    |         |
| Brunetti 2006             | !  | -  | -  | -  | !  | -       |
| Strength                  |    |    |    |    |    |         |
| Brunetti 2006             | !  | -  | -  | +  | !  | -       |
| Coulondre 2022            | !  | +  | +  | +  | -  | -       |
| Park 2019                 | !  | +  | !  | +  | !  | !       |
| Patient reported outcomes |    |    |    |    |    |         |
| Brunetti 2006             | !  | -  | -  | -  | !  | -       |
| Park 2019                 | !  | +  | !  | -  | !  | -       |
| Functional                |    |    |    |    |    |         |
| Coulondre 2022            | !  | +  | +  | +  | -  | -       |
| Range of motion           |    |    |    |    |    |         |
| Park 2019                 | !  | +  | !  | +  | !  | !       |
| Pain                      |    |    |    |    |    |         |
| Park 2019                 | !  | +  | !  | -  | !  | -       |

Early mobilisation versus delayed mobilisation

| Outcome / Author          | D1 | D2 | D3 | D4 | D5 | Overall |
|---------------------------|----|----|----|----|----|---------|
| Range of motion           |    |    |    |    |    |         |
| Haggmark 1979             | !  | -  | -  | -  | -  | -       |
| Henriksson 2002           | !  | -  | !  | -  | !  | -       |
| Hiemstra 2009             | +  | -  | +  | -  | !  | -       |
| Isberg 2006               | +  | -  | +  | +  | -  | -       |
| Christensen 2013          | +  | -  | +  | !  | !  | -       |
| Noyes 1987                | !  | -  | -  | -  | !  | -       |
| Vadala 2007               | !  | -  | !  | +  | !  | -       |
| Pain                      |    |    |    |    |    |         |
| Hiemstra 2009             | +  | -  | +  | -  | !  | -       |
| Pain - Medication used    |    |    |    |    |    |         |
| Hiemstra 2009             | +  | -  | +  | -  | !  | -       |
| Noyes 1987                | !  | -  | -  | -  | !  | -       |
| Laxity                    |    |    |    |    |    |         |
| Noyes 1987                | !  | -  | -  | -  | !  | -       |
| Henriksson 2002           | !  | -  | !  | -  | !  | -       |
| Ito 2007                  | -  | -  | -  | !  | !  | -       |
| Isberg 2006               | +  | -  | +  | +  | !  | -       |
| Vadala 2007               | !  | -  | !  | +  | !  | -       |
| Christensen 2013          | +  | -  | +  | +  | !  | -       |
| Haggmark 1979             | !  | -  | -  | -  | -  | -       |
| Patient reported outcomes |    |    |    |    |    |         |
| Henriksson 2002           | !  | -  | !  | -  | -  | -       |
| Ito 2007                  | -  | -  | -  | -  | !  | -       |
| Isberg 2006               | +  | -  | +  | !  | -  | -       |
| Christensen 2013          | +  | -  | +  | -  | !  | -       |

| Outcome                      | Author           | D1 | D2 | D3 | D4 | D5 | Overall |
|------------------------------|------------------|----|----|----|----|----|---------|
| <b>Swelling</b>              |                  |    |    |    |    |    |         |
|                              | Noyes 1987       | !  | -  | -  | -  | -  | -       |
| <b>Atrophy</b>               |                  |    |    |    |    |    |         |
|                              | Haggmark 1979    | !  | -  | -  | -  | -  | -       |
|                              | Noyes 1987       | !  | -  | -  | -  | -  | -       |
| <b>Strength</b>              |                  |    |    |    |    |    |         |
|                              | Henriksson 2002  | !  | -  | !  | -  | -  | -       |
|                              | Ito 2007         | -  | -  | -  | !  | !  | -       |
|                              | Christensen 2013 | +  | -  | +  | -  | !  | -       |
| <b>Functional activities</b> |                  |    |    |    |    |    |         |
|                              | Isberg 2006      | +  | -  | +  | +  | -  | -       |
| <b>Proprioception</b>        |                  |    |    |    |    |    |         |
|                              | Ito 2007         | -  | -  | -  | -  | !  | -       |

- + Low risk
  - ! Some concerns
  - High risk
- D1 Randomisation process
  - D2 Deviations from the intended interventions
  - D3 Missing outcome data
  - D4 Measurement of the outcome
  - D5 Selection of the reported result

**Immediate weight-bearing versus delayed weight-bearing**

| Outcome / Author                 | D1 | D2 | D3 | D4 | D5 | Overall |
|----------------------------------|----|----|----|----|----|---------|
| <b>Range of motion</b>           |    |    |    |    |    |         |
| Tyler 1998                       | !  | -  | !  | -  | !  | -       |
| <b>Laxity</b>                    |    |    |    |    |    |         |
| Tyler 1998                       | !  | -  | !  | -  | !  | -       |
| <b>Patient reported outcomes</b> |    |    |    |    |    |         |
| Tyler 1998                       | !  | -  | !  | -  | -  | -       |
| <b>Pain</b>                      |    |    |    |    |    |         |
| Tyler 1998                       | !  | -  | !  | -  | -  | -       |

**Early start of OKC versus delayed start of OKC exercises**

| Outcome / Author                 | D1 | D2 | D3 | D4 | D5 | Overall |
|----------------------------------|----|----|----|----|----|---------|
| <b>Strength</b>                  |    |    |    |    |    |         |
| Heijne 2007                      | +  | -  | -  | +  | !  | -       |
| Fukuda 2013                      | +  | -  | !  | +  | !  | -       |
| <b>Laxity</b>                    |    |    |    |    |    |         |
| Heijne 2007                      | +  | -  | -  | +  | !  | -       |
| Fukuda 2013                      | +  | -  | !  | +  | !  | -       |
| <b>Pain</b>                      |    |    |    |    |    |         |
| Heijne 2007                      | +  | -  | -  | !  | !  | -       |
| Fukuda 2013                      | +  | -  | !  | !  | !  | -       |
| <b>Patient reported outcomes</b> |    |    |    |    |    |         |
| Fukuda 2013                      | +  | -  | !  | !  | !  | -       |
| <b>Functional activities</b>     |    |    |    |    |    |         |
| Fukuda 2013                      | +  | -  | !  | +  | !  | -       |
| <b>Balance</b>                   |    |    |    |    |    |         |
| Heijne 2007                      | +  | -  | -  | +  | !  | -       |
| <b>Range of motion</b>           |    |    |    |    |    |         |
| Heijne 2007                      | +  | -  | -  | +  | !  | -       |

**Early isometric strengthening versus usual care**

| Outcome / Author                 | D1 | D2 | D3 | D4 | D5 | Overall |
|----------------------------------|----|----|----|----|----|---------|
| <b>Strength</b>                  |    |    |    |    |    |         |
| Shaw 2005                        | !  | -  | -  | -  | !  | -       |
| <b>Laxity</b>                    |    |    |    |    |    |         |
| Shaw 2005                        | !  | -  | -  | !  | !  | -       |
| <b>Range of motion</b>           |    |    |    |    |    |         |
| Shaw 2005                        | !  | -  | -  | +  | !  | -       |
| <b>Patient reported outcomes</b> |    |    |    |    |    |         |
| Shaw 2005                        | !  | -  | -  | -  | !  | -       |

|                                        |  | Pain                  |    |    |    |    |         |   |
|----------------------------------------|--|-----------------------|----|----|----|----|---------|---|
| Shaw 2005                              |  | !                     | -  | -  | -  | !  | -       |   |
|                                        |  | Functional activities |    |    |    |    |         |   |
| Shaw 2005                              |  | !                     | -  | -  | +  | !  | -       |   |
|                                        |  | +                     | !  |    |    |    |         | - |
|                                        |  | D1                    | D2 | D3 | D4 | D5 | Overall |   |
| Outcome / Author                       |  |                       |    |    |    |    |         |   |
| Strength                               |  |                       |    |    |    |    |         |   |
| Kinikli 2014                           |  | !                     | !  | !  | -  | !  | -       |   |
| Patient reported outcomes              |  |                       |    |    |    |    |         |   |
| Kinikli 2014                           |  | !                     | !  | !  | +  | !  | -       |   |
| Functional activities                  |  |                       |    |    |    |    |         |   |
| Kinikli 2014                           |  | !                     | !  | !  | -  | !  | -       |   |
|                                        |  | D1                    | D2 | D3 | D4 | D5 | Overall |   |
| Outcome / Author <td colspan="6"></td> |  |                       |    |    |    |    |         |   |
| Strength                               |  |                       |    |    |    |    |         |   |
| Sekir 2010                             |  | !                     | -  | -  | +  | !  | -       |   |
| Patient reported outcomes              |  |                       |    |    |    |    |         |   |
| Sekir 2010                             |  | !                     | -  | -  | -  | !  | -       |   |
|                                        |  | D1                    | D2 | D3 | D4 | D5 | Overall |   |
| Outcome / Author <td colspan="6"></td> |  |                       |    |    |    |    |         |   |
| Strength                               |  |                       |    |    |    |    |         |   |
| Gerber 2007a                           |  | -                     | -  | -  | -  | !  | -       |   |
| Gerber 2009                            |  | -                     | -  | -  | !  | -  | -       |   |
| Gerber 2007b                           |  | !                     | -  | +  | -  | !  | -       |   |
| Atrophy                                |  |                       |    |    |    |    |         |   |
| Gerber 2009                            |  | -                     | -  | -  | +  | -  | -       |   |
| Gerber 2007b                           |  | !                     | -  | +  | -  | !  | -       |   |
| Patient reported outcomes              |  |                       |    |    |    |    |         |   |
| Gerber 2007a                           |  | -                     | -  | -  | -  | !  | -       |   |
| Gerber 2009                            |  | -                     | -  | -  | !  | -  | -       |   |
| Gerber 2007b                           |  | !                     | -  | +  | -  | !  | -       |   |
| Laxity                                 |  |                       |    |    |    |    |         |   |
| Gerber 2007a                           |  | -                     | -  | -  | -  | !  | -       |   |
| Gerber 2009                            |  | -                     | -  | -  | -  | -  | -       |   |
| Gerber 2007b                           |  | !                     | -  | +  | -  | !  | -       |   |
| Pain                                   |  |                       |    |    |    |    |         |   |
| Gerber 2007a                           |  | -                     | -  | -  | -  | !  | -       |   |
| Swelling                               |  |                       |    |    |    |    |         |   |
| Gerber 2007a                           |  | -                     | -  | -  | -  | !  | -       |   |
| Functional activities                  |  |                       |    |    |    |    |         |   |
| Gerber 2007a                           |  | -                     | -  | -  | -  | !  | -       |   |
| Gerber 2009                            |  | -                     | -  | -  | !  | -  | -       |   |
| Gerber 2007b                           |  | !                     | -  | +  | -  | !  | -       |   |
|                                        |  | D1                    | D2 | D3 | D4 | D5 | Overall |   |
| Outcome / Author <td colspan="6"></td> |  |                       |    |    |    |    |         |   |
| Strength                               |  |                       |    |    |    |    |         |   |
| Mikkelsen 2000                         |  | -                     | +  | +  | +  | !  | -       |   |
| Morrissey 2002                         |  | !                     | +  | +  | +  | !  | !       |   |
| Kang 2012                              |  | !                     | -  | +  | +  | !  | -       |   |

| Outcome                          | Author         | D1 | D2 | D3 | D4 | D5 | Overall |
|----------------------------------|----------------|----|----|----|----|----|---------|
| <b>Laxity</b>                    |                |    |    |    |    |    |         |
|                                  | Bynum 1995     | +  | +  | -  | +  | !  | !       |
|                                  | Morrissey 2000 | !  | +  | +  | +  | !  | !       |
|                                  | Mikkelsen 2000 | -  | +  | +  | +  | !  | !       |
|                                  | Perry 2005     | !  | +  | +  | +  | !  | !       |
| <b>Pain</b>                      |                |    |    |    |    |    |         |
|                                  | Morrissey 2002 | !  | +  | +  | !  | !  | !       |
|                                  | Ucar 2014      | !  | -  | -  | !  | !  | !       |
| <b>Patient reported outcomes</b> |                |    |    |    |    |    |         |
|                                  | Bynum 1995     | +  | +  | -  | !  | !  | !       |
|                                  | Morrissey 2002 | !  | +  | +  | !  | !  | !       |
|                                  | Perry 2005     | !  | +  | +  | !  | !  | !       |
|                                  | Chrzan 2013    | -  | +  | +  | !  | !  | !       |
|                                  | Ucar 2014      | !  | -  | -  | !  | !  | !       |
|                                  | Hooper 2001    | !  | +  | !  | !  | !  | !       |
| <b>Atrophy</b>                   |                |    |    |    |    |    |         |
|                                  | Ucar 2014      | !  | -  | -  | +  | !  | !       |
| <b>Range of motion</b>           |                |    |    |    |    |    |         |
|                                  | Ucar 2014      | !  | -  | -  | +  | !  | !       |
| <b>Functional activities</b>     |                |    |    |    |    |    |         |
|                                  | Hooper 2001    | !  | +  | !  | +  | !  | !       |
|                                  | Perry 2005     | !  | +  | -  | !  | !  | !       |
| <b>Return to sport</b>           |                |    |    |    |    |    |         |
|                                  | Mikkelsen 2000 | -  | +  | +  | !  | !  | !       |

- + Low risk
  - ! Some concerns
  - High risk
- D1 Randomisation process
  - D2 Deviations from the intended interventions
  - D3 Missing outcome data
  - D4 Measurement of the outcome
  - D5 Selection of the reported result

Eccentric training versus usual care

| Outcome / Author                 | D1 | D2 | D3 | D4 | D5 | Overall |
|----------------------------------|----|----|----|----|----|---------|
| <b>Strength</b>                  |    |    |    |    |    |         |
| Friedmann-bette 2018             | !  | +  | -  | +  | !  | !       |
| Milandri 2021                    | +  | +  | +  | +  | +  | +       |
| <b>Atrophy</b>                   |    |    |    |    |    |         |
| Friedmann-bette 2018             | !  | +  | -  | +  | !  | !       |
| Milandri 2021                    | +  | +  | +  | +  | +  | +       |
| <b>Patient reported outcomes</b> |    |    |    |    |    |         |
| Milandri 2021                    | +  | +  | +  | !  | +  | !       |
| Kasmi 2021                       | !  | +  | +  | !  | !  | !       |
| <b>Functional activities</b>     |    |    |    |    |    |         |
| Kasmi 2021                       | !  | +  | +  | +  | !  | !       |
| <b>Balance</b>                   |    |    |    |    |    |         |
| Kasmi 2021                       | !  | +  | +  | +  | !  | !       |

Isokinetic training versus isotonic training

| Outcome / Author                 | D1 | D2 | D3 | D4 | D5 | Overall |
|----------------------------------|----|----|----|----|----|---------|
| <b>Strength</b>                  |    |    |    |    |    |         |
| Vidmar 2020                      | +  | +  | +  | +  | +  | +       |
| Tsaklis 2002                     | !  | -  | -  | +  | !  | !       |
| <b>Atrophy</b>                   |    |    |    |    |    |         |
| Vidmar 2020                      | +  | +  | +  | +  | +  | +       |
| Tsaklis 2002                     | !  | -  | -  | +  | !  | !       |
| <b>Patient reported outcomes</b> |    |    |    |    |    |         |
| Vidmar 2020                      | +  | +  | +  | !  | +  | !       |
| <b>Functional activities</b>     |    |    |    |    |    |         |
| Vidmar 2020                      | +  | +  | +  | +  | !  | !       |

| Outcome / Author                                           | D1 | D2 | D3 | D4 | D5 | Overall |
|------------------------------------------------------------|----|----|----|----|----|---------|
| <b>Low intensity vs high intensity resistance training</b> |    |    |    |    |    |         |
| <b>Strength</b>                                            |    |    |    |    |    |         |
| Bieler 2014                                                | !  | -  | -  | +  | !  | -       |
| <b>Patient reported outcomes</b>                           |    |    |    |    |    |         |
| Bieler 2014                                                | !  | -  | -  | !  | !  | -       |
| <b>Functional activities</b>                               |    |    |    |    |    |         |
| Bieler 2014                                                | !  | -  | -  | +  | !  | -       |
| <b>Laxity</b>                                              |    |    |    |    |    |         |
| Bieler 2014                                                | !  | -  | -  | +  | !  | -       |

+ Low risk  
! Some concerns  
- High risk

D1 Randomisation process  
 D2 Deviations from the intended interventions  
 D3 Missing outcome data  
 D4 Measurement of the outcome  
 D5 Selection of the reported result

| Outcome / Author                            | D1 | D2 | D3 | D4 | D5 | Overall |
|---------------------------------------------|----|----|----|----|----|---------|
| <b>Motor control training vs usual care</b> |    |    |    |    |    |         |
| <b>Proprioception</b>                       |    |    |    |    |    |         |
| Kaya 2019                                   | !  | -  | !  | +  | !  | -       |
| Cho 2013                                    | !  | -  | +  | +  | !  | -       |
| Shen 2021                                   | !  | -  | +  | +  | !  | -       |
| Hajouj 2021                                 | +  | -  | +  | +  | !  | -       |
| Baltaci 2013                                | !  | !  | +  | +  | !  | !       |
| <b>Balance</b>                              |    |    |    |    |    |         |
| Baltaci 2013                                | !  | !  | +  | +  | !  | !       |
| Cappellino 2012                             | !  | -  | +  | +  | !  | -       |
| <b>Coordination</b>                         |    |    |    |    |    |         |
| Baltaci 2013                                | !  | !  | +  | +  | !  | !       |
| <b>Reactivity</b>                           |    |    |    |    |    |         |
| Baltaci 2013                                | !  | !  | +  | +  | !  | !       |
| Bartels 2016                                | !  | -  | -  | +  | !  | -       |
| <b>Patient reported outcomes</b>            |    |    |    |    |    |         |
| Cappellino 2012                             | !  | -  | +  | !  | !  | -       |
| Cho 2013                                    | !  | -  | +  | !  | !  | -       |
| Hajouj 2021                                 | +  | -  | +  | !  | !  | -       |
| <b>Functional</b>                           |    |    |    |    |    |         |
| Cappellino 2012                             | !  | -  | +  | +  | !  | -       |
| Kaya 2019                                   | !  | -  | !  | +  | !  | -       |
| Bartels 2016                                | !  | -  | -  | +  | !  | -       |
| <b>Strength</b>                             |    |    |    |    |    |         |
| Baltaci 2013                                | !  | !  | +  | +  | !  | !       |
| Kaya 2019                                   | !  | -  | !  | +  | !  | -       |
| <b>Atrophy</b>                              |    |    |    |    |    |         |
| Cappellino 2012                             | !  | -  | +  | +  | !  | -       |
| Bartels 2016                                | !  | -  | -  | +  | !  | -       |
| <b>Pain</b>                                 |    |    |    |    |    |         |
| Hajouj 2021                                 | +  | -  | +  | !  | !  | -       |
| Cappellino 2012                             | !  | -  | +  | !  | !  | -       |
| <b>Range of motion</b>                      |    |    |    |    |    |         |
| Cappellino 2012                             | !  | -  | +  | -  | !  | -       |
| Bartels 2016                                | !  | -  | -  | +  | !  | -       |
| <b>Swelling</b>                             |    |    |    |    |    |         |
| Cappellino 2012                             | !  | -  | +  | +  | !  | -       |
| <b>Laxity</b>                               |    |    |    |    |    |         |
| Kaya 2019                                   | !  | -  | !  | +  | !  | -       |

| Outcome / Author                                   | D1        | D2            | D3       | D4            | D5            | Overall       |
|----------------------------------------------------|-----------|---------------|----------|---------------|---------------|---------------|
| <b>Motor control training vs strength training</b> |           |               |          |               |               |               |
| <b>Strength</b>                                    |           |               |          |               |               |               |
| Liu-ambrose 2003                                   | High risk | Some concerns | Low risk | Low risk      | High risk     | High risk     |
| <b>Patient reported outcomes</b>                   |           |               |          |               |               |               |
| Liu-ambrose 2003                                   | High risk | Some concerns | Low risk | Some concerns | Some concerns | High risk     |
| Cooper 2005                                        | Low risk  | Low risk      | Low risk | Some concerns | Some concerns | Some concerns |
| <b>Functional</b>                                  |           |               |          |               |               |               |
| Liu-ambrose 2003                                   | High risk | Some concerns | Low risk | Low risk      | Some concerns | High risk     |
| Cooper 2005                                        | Low risk  | Low risk      | Low risk | Low risk      | Some concerns | Some concerns |
| <b>Range of motion</b>                             |           |               |          |               |               |               |
| Cooper 2005                                        | Low risk  | Low risk      | Low risk | Low risk      | Some concerns | Some concerns |

- Low risk
  - ! Some concerns
  - High risk
- D1 Randomisation process
  - D2 Deviations from the intended interventions
  - D3 Missing outcome data
  - D4 Measurement of the outcome
  - D5 Selection of the reported result

| Outcome / Author                                         | D1            | D2        | D3            | D4            | D5            | Overall       |
|----------------------------------------------------------|---------------|-----------|---------------|---------------|---------------|---------------|
| <b>Plyometric and agility training versus usual care</b> |               |           |               |               |               |               |
| <b>Strength</b>                                          |               |           |               |               |               |               |
| Risberg 2009                                             | Low risk      | Low risk  | Low risk      | Low risk      | Some concerns | Some concerns |
| <b>Balance</b>                                           |               |           |               |               |               |               |
| Risberg 2007                                             | Low risk      | Low risk  | Some concerns | Low risk      | Some concerns | Some concerns |
| Kasmi 2021                                               | Some concerns | Low risk  | Low risk      | Low risk      | Some concerns | Some concerns |
| <b>Proprioception</b>                                    |               |           |               |               |               |               |
| Risberg 2007                                             | Low risk      | Low risk  | Some concerns | Low risk      | Some concerns | Some concerns |
| <b>Patient reported outcomes</b>                         |               |           |               |               |               |               |
| Risberg 2007                                             | Low risk      | Low risk  | Some concerns | Some concerns | Some concerns | Some concerns |
| Risberg 2009                                             | Low risk      | Low risk  | Low risk      | Some concerns | Some concerns | Some concerns |
| Kasmi 2021                                               | Some concerns | Low risk  | Low risk      | Some concerns | Some concerns | Some concerns |
| <b>Functional</b>                                        |               |           |               |               |               |               |
| Risberg 2009                                             | Low risk      | Low risk  | Low risk      | Some concerns | Some concerns | Some concerns |
| Souissi 2011                                             | Some concerns | Low risk  | Low risk      | Low risk      | Some concerns | Some concerns |
| Kasmi 2021                                               | Some concerns | Low risk  | Low risk      | Low risk      | Some concerns | Some concerns |
| <b>Pain</b>                                              |               |           |               |               |               |               |
| Risberg 2009                                             | Low risk      | Low risk  | Low risk      | Low risk      | Some concerns | Some concerns |
| Risberg 2007                                             | Some concerns | High risk | Low risk      | Some concerns | Some concerns | High risk     |
| <b>Laxity</b>                                            |               |           |               |               |               |               |
| Risberg 2007                                             | Low risk      | Low risk  | Some concerns | Low risk      | Some concerns | Some concerns |
| Risberg 2009                                             | Low risk      | Low risk  | Low risk      | Low risk      | Some concerns | Some concerns |

| Outcome / Author                                           | D1            | D2       | D3       | D4            | D5            | Overall       |
|------------------------------------------------------------|---------------|----------|----------|---------------|---------------|---------------|
| <b>Plyometric and eccentric training versus usual care</b> |               |          |          |               |               |               |
| <b>Balance</b>                                             |               |          |          |               |               |               |
| Kasmi 2021                                                 | Some concerns | Low risk | Low risk | Low risk      | Some concerns | Some concerns |
| <b>Patient reported outcomes</b>                           |               |          |          |               |               |               |
| Kasmi 2021                                                 | Some concerns | Low risk | Low risk | Some concerns | Some concerns | Some concerns |
| <b>Functional</b>                                          |               |          |          |               |               |               |
| Kasmi 2021                                                 | Some concerns | Low risk | Low risk | Low risk      | Some concerns | Some concerns |

| Outcome / Author                                           | D1       | D2       | D3       | D4            | D5       | Overall       |
|------------------------------------------------------------|----------|----------|----------|---------------|----------|---------------|
| <b>Low intensity vs high intensity plyometric training</b> |          |          |          |               |          |               |
| <b>Strength</b>                                            |          |          |          |               |          |               |
| Chmielewski 2016                                           | Low risk | Low risk | Low risk | Low risk      | Low risk | Low risk      |
| <b>Patient reported outcomes</b>                           |          |          |          |               |          |               |
| Chmielewski 2016                                           | Low risk | Low risk | Low risk | Some concerns | Low risk | Some concerns |
| <b>Functional activities</b>                               |          |          |          |               |          |               |
| Chmielewski 2016                                           | Low risk | Low risk | Low risk | Low risk      | Low risk | Low risk      |
| <b>Laxity</b>                                              |          |          |          |               |          |               |
| Chmielewski 2016                                           | Low risk | Low risk | Low risk | Low risk      | Low risk | Low risk      |
| <b>Pain</b>                                                |          |          |          |               |          |               |
| Chmielewski 2016                                           | Low risk | Low risk | Low risk | Some concerns | Low risk | Some concerns |

| Outcome / Author                         | D1 | D2 | D3 | D4 | D5 | Overall |
|------------------------------------------|----|----|----|----|----|---------|
| <b>Cross-education versus usual care</b> |    |    |    |    |    |         |
| <b>Strength</b>                          |    |    |    |    |    |         |
| Harput 2019                              | !  | +  | +  | +  | -  | -       |
| Minshull 2021                            | +  | +  | !  | +  | !  | !       |
| Zult 2019                                | +  | !  | +  | +  | +  | !       |
| Papandreou 2013                          | !  | -  | +  | +  | !  | -       |
| Papandreou 2007                          | !  | -  | +  | +  | !  | -       |
| <b>Patient reported outcomes</b>         |    |    |    |    |    |         |
| Zult 2019                                | +  | !  | +  | -  | +  | -       |
| Harput 2019                              | !  | +  | +  | -  | -  | -       |
| Minshull 2021                            | +  | -  | !  | -  | !  | -       |
| Papandreou 2009                          | !  | +  | +  | -  | +  | -       |
| <b>Functional activities</b>             |    |    |    |    |    |         |
| Zult 2019                                | +  | !  | +  | +  | +  | !       |
| Harput 2019                              | !  | +  | +  | +  | -  | -       |
| Minshull 2021                            | +  | -  | !  | -  | !  | !       |
| <b>Proprioception</b>                    |    |    |    |    |    |         |
| Zult 2018                                | +  | !  | +  | +  | +  | !       |
| <b>Balance</b>                           |    |    |    |    |    |         |
| Zult 2018                                | +  | !  | +  | +  | +  | !       |

+ Low risk  
! Some concerns  
- High risk  
 D1 Randomisation process  
 D2 Deviations from the intended interventions  
 D3 Missing outcome data  
 D4 Measurement of the outcome  
 D5 Selection of the reported result

| Outcome / Author                                                 | D1 | D2 | D3 | D4 | D5 | Overall |
|------------------------------------------------------------------|----|----|----|----|----|---------|
| <b>Core stability training versus no core stability training</b> |    |    |    |    |    |         |
| <b>Range of motion</b>                                           |    |    |    |    |    |         |
| Panchal 2017                                                     | !  | !  | +  | +  | !  | !       |
| Li 2019                                                          | !  | !  | +  | -  | !  | -       |
| <b>Patient reported outcomes</b>                                 |    |    |    |    |    |         |
| Panchal 2017                                                     | !  | !  | +  | -  | !  | -       |
| Li 2019                                                          | !  | !  | +  | -  | !  | -       |
| <b>Functional activities</b>                                     |    |    |    |    |    |         |
| Li 2019                                                          | !  | !  | +  | -  | !  | -       |
| <b>Pain</b>                                                      |    |    |    |    |    |         |
| Panchal 2017                                                     | !  | !  | +  | -  | !  | -       |

| Outcome / Author                                 | D1 | D2 | D3 | D4 | D5 | Overall |
|--------------------------------------------------|----|----|----|----|----|---------|
| <b>Aquatic therapy versus no aquatic therapy</b> |    |    |    |    |    |         |
| <b>Strength</b>                                  |    |    |    |    |    |         |
| Tovin 1994                                       | !  | -  | +  | +  | !  | -       |
| <b>Range of motion</b>                           |    |    |    |    |    |         |
| Tovin 1994                                       | !  | -  | +  | +  | !  | -       |
| Zamarioli 2008                                   | !  | -  | -  | +  | !  | -       |
| Peultier-Celli 2017                              | +  | +  | +  | +  | !  | !       |
| <b>Patient reported outcomes</b>                 |    |    |    |    |    |         |
| Tovin 1994                                       | !  | -  | +  | -  | !  | -       |
| Peultier-Celli 2017                              | +  | +  | +  | -  | !  | -       |
| <b>Functional activities</b>                     |    |    |    |    |    |         |
| Peultier-Celli 2017                              | +  | +  | +  | +  | !  | !       |
| <b>Laxity</b>                                    |    |    |    |    |    |         |
| Tovin 1994                                       | !  | -  | +  | +  | !  | -       |
| <b>Proprioception</b>                            |    |    |    |    |    |         |
| Peultier-Celli 2017                              | +  | +  | +  | +  | !  | !       |
| <b>Pain</b>                                      |    |    |    |    |    |         |
| Zamarioli 2008                                   | !  | -  | -  | -  | !  | -       |
| Peultier-Celli 2017                              | +  | +  | +  | -  | !  | -       |

| Balance             |   |   |   |   |   |   |
|---------------------|---|---|---|---|---|---|
| Peultier-Celli 2017 | + | + | + | + | ! | ! |
| Atrophy             |   |   |   |   |   |   |
| Tovin 1994          | ! | - | + | + | ! | - |
| Zamarioli 2008      | ! | - | - | + | ! | - |
| Swelling            |   |   |   |   |   |   |
| Tovin 1994          | ! | - | + | + | ! | - |
| Zamarioli 2008      | ! | - | - | + | ! | - |

Risk of Bias assessment for systematic and scoping reviews

| Study         | Risk of bias |         |         |         | Overall |
|---------------|--------------|---------|---------|---------|---------|
|               | D1           | D2      | D3      | D4      |         |
| Salem 2021    | High         | Unclear | High    | High    | High    |
| Rambaud 2018  | Low          | High    | High    | High    | High    |
| Losciale 2019 | Unclear      | Unclear | Low     | Unclear | Unclear |
| Webster 2019  | Unclear      | High    | High    | High    | High    |
| Ashigbi 2020  | Low          | Unclear | Unclear | High    | High    |
| Hurley 2022   | High         | High    | Unclear | High    | High    |

D1: DOMAIN 1: STUDY ELIGIBILITY CRITERIA  
 D2: DOMAIN 2: IDENTIFICATION AND SELECTION OF STUDIES  
 D3: DOMAIN 3: DATA COLLECTION AND STUDY APPRAISAL  
 D4: DOMAIN 4: SYNTHESIS AND FINDINGS

Judgement  
 High  
 Unclear  
 Low

## GRADE Evidence Assessment

| Quality assessment domain | Standard downgrade | Reasons for downgrade                                                                                                                                                                                  |
|---------------------------|--------------------|--------------------------------------------------------------------------------------------------------------------------------------------------------------------------------------------------------|
|                           |                    |                                                                                                                                                                                                        |
| Risk of Bias              | Serious= -1        | "Some concerns", as determined by the RoB2 tool.                                                                                                                                                       |
|                           | Very Serious= -2   | "High risk", as determined by the RoB2 tool                                                                                                                                                            |
|                           |                    |                                                                                                                                                                                                        |
| Inconsistency             | Serious= -1        | 40-75% I <sup>2</sup>                                                                                                                                                                                  |
|                           | Very Serious= -2   | >75% I <sup>2</sup>                                                                                                                                                                                    |
|                           |                    |                                                                                                                                                                                                        |
| Indirectness              | Serious= -1        | Indirectness present in one of the four key extraction categories- Population, Intervention, Comparator, Outcome                                                                                       |
|                           | Very Serious= -2   | Indirectness present in more than one of the four key extraction categories Population, Intervention, Comparator, Outcome                                                                              |
|                           |                    |                                                                                                                                                                                                        |
| Imprecision               | Serious= -1        | Total participants <800<br>95% CI of an SMD extends > 0.5 points in either direction (continuous outcomes)<br>95% CI boundaries cross the arbitrary thresholds of 0.75 and 1.25 (dichotomous outcomes) |
|                           | Very Serious= -2   | Studies not reporting results or SDs                                                                                                                                                                   |

## Summary of Findings tables

### Pre-operative rehabilitation versus no pre-operative rehabilitation after ACLR

Bibliography: Shaarani 2013, Kim 2015, Reddy 2020

| No of studies                                                                                                | Study design      | Certainty assessment |                                   |              |                              |                      | No of patients   |                     | Effect                                                                                                    |                   | Certainty | Importance |
|--------------------------------------------------------------------------------------------------------------|-------------------|----------------------|-----------------------------------|--------------|------------------------------|----------------------|------------------|---------------------|-----------------------------------------------------------------------------------------------------------|-------------------|-----------|------------|
|                                                                                                              |                   | Risk of bias         | Inconsistency                     | Indirectness | Imprecision                  | Other considerations | pre-habilitation | no pre-habilitation | Relative (95% CI)                                                                                         | Absolute (95% CI) |           |            |
| <b>Strength</b>                                                                                              |                   |                      |                                   |              |                              |                      |                  |                     |                                                                                                           |                   |           |            |
| 2                                                                                                            |                   |                      |                                   |              |                              |                      |                  |                     |                                                                                                           |                   |           |            |
| <b>Strength - Quadriceps CON 60-90°/s (better indicated by higher values) – 3 months post-op</b>             |                   |                      |                                   |              |                              |                      |                  |                     |                                                                                                           |                   |           |            |
| 2<br>Kim 2015<br>Shaarani 2013                                                                               | randomised trials | very serious         | not serious<br>I <sup>2</sup> =0% | not serious  | serious <sup>a</sup>         | none                 | 54               | 49                  | SMD <b>0.75 higher</b><br>(0.35 higher to 1.15 higher)                                                    | ⊕○○○<br>Very low  | CRITICAL  |            |
| <b>Strength - Quadriceps CON 180°/s (better indicated by higher values) – 3 months post-op</b>               |                   |                      |                                   |              |                              |                      |                  |                     |                                                                                                           |                   |           |            |
| 1<br>Kim 2015                                                                                                | randomised trial  | very serious         | not assessable                    | not serious  | serious <sup>a</sup>         | none                 | 40               | 40                  | SMD <b>0.42 higher</b><br>(0.03 lower to 0.86 higher)                                                     | ⊕○○○<br>Very low  | CRITICAL  |            |
| <b>Strength - Hamstring CON 90°/s (better indicated by higher values) – 3 months post-op</b>                 |                   |                      |                                   |              |                              |                      |                  |                     |                                                                                                           |                   |           |            |
| 1<br>Shaarani 2013                                                                                           | randomised trial  | very serious         | not assessable                    | not serious  | very serious <sup>a, b</sup> | none                 | 14               | 9                   | SMD <b>0.76 higher</b><br>(0.11 lower to 1.63 higher)                                                     | ⊕○○○<br>Very low  | CRITICAL  |            |
| <b>Atrophy</b>                                                                                               |                   |                      |                                   |              |                              |                      |                  |                     |                                                                                                           |                   |           |            |
| 1                                                                                                            |                   |                      |                                   |              |                              |                      |                  |                     |                                                                                                           |                   |           |            |
| <b>Atrophy - Quadriceps cross sectional area (better indicated by higher values) – 3 months post-op</b>      |                   |                      |                                   |              |                              |                      |                  |                     |                                                                                                           |                   |           |            |
| 1<br>Shaarani 2013                                                                                           | randomised trial  | very serious         | not assessable                    | not serious  | very serious <sup>a, b</sup> | none                 | 14               | 9                   | SMD <b>0.79 lower</b><br>(1.67 lower to 0.08 higher)                                                      | ⊕○○○<br>Very low  | CRITICAL  |            |
| <b>Atrophy - Vastus Medialis cross sectional area (better indicated by higher values) – 3 months post-op</b> |                   |                      |                                   |              |                              |                      |                  |                     |                                                                                                           |                   |           |            |
| 1<br>Shaarani 2013                                                                                           | randomised trial  | very serious         | not assessable                    | not serious  | very serious <sup>a, b</sup> | none                 | 14               | 9                   | SMD <b>0.47 higher</b><br>(0.38 lower to 1.32 higher)                                                     | ⊕○○○<br>Very low  | CRITICAL  |            |
| <b>Atrophy - Hamstring cross sectional area – 3 months post-op</b>                                           |                   |                      |                                   |              |                              |                      |                  |                     |                                                                                                           |                   |           |            |
| 1<br>Shaarani 2013                                                                                           | randomised trial  | very serious         | not assessable                    | not serious  | very serious <sup>a, c</sup> | none                 | 14               | 9                   | The authors reported no statistically significant difference between the two groups.                      | ⊕○○○<br>Very low  | CRITICAL  |            |
| <b>Functional activities</b>                                                                                 |                   |                      |                                   |              |                              |                      |                  |                     |                                                                                                           |                   |           |            |
| 2                                                                                                            |                   |                      |                                   |              |                              |                      |                  |                     |                                                                                                           |                   |           |            |
| <b>Functional - single hop for distance (better indicated by higher values) – 3 months post-op</b>           |                   |                      |                                   |              |                              |                      |                  |                     |                                                                                                           |                   |           |            |
| 2<br>Kim 2015<br>Shaarani 2013                                                                               | randomised trials | very serious         | serious<br>I <sup>2</sup> =69%    | not serious  | very serious <sup>a, b</sup> | none                 | 54               | 49                  | SMD <b>0.94 higher</b><br>(0.01 higher to 1.87 higher)                                                    | ⊕○○○<br>Very low  | IMPORTANT |            |
| <b>Patient reported outcomes (PROM)</b>                                                                      |                   |                      |                                   |              |                              |                      |                  |                     |                                                                                                           |                   |           |            |
| 2                                                                                                            |                   |                      |                                   |              |                              |                      |                  |                     |                                                                                                           |                   |           |            |
| <b>PROM - Lysholm score – 3 weeks post-op</b>                                                                |                   |                      |                                   |              |                              |                      |                  |                     |                                                                                                           |                   |           |            |
| 1<br>Reddy 2020                                                                                              | randomised trial  | very serious         | not assessable                    | not serious  | very serious <sup>a, c</sup> | none                 | 20               | 21                  | SDs are not reported. The authors reported no statistically significant difference between the two groups | ⊕○○○<br>Very low  | CRITICAL  |            |
| <b>PROM - Lysholm score – 6 weeks post-op</b>                                                                |                   |                      |                                   |              |                              |                      |                  |                     |                                                                                                           |                   |           |            |
| 1<br>Reddy 2020                                                                                              | randomised trial  | very serious         | not assessable                    | not serious  | very serious <sup>a, c</sup> | none                 | 20               | 21                  | SDs are not reported. The authors reported no statistically significant difference between the two groups | ⊕○○○<br>Very low  | CRITICAL  |            |
| <b>PROM - Lysholm score – 3 months post-op</b>                                                               |                   |                      |                                   |              |                              |                      |                  |                     |                                                                                                           |                   |           |            |

| Certainty assessment                                                                                 |                     |              |                |              |                              |                      | No of patients   |                     | Effect                                                                                                    |                                                         | Certainty        | Importance |
|------------------------------------------------------------------------------------------------------|---------------------|--------------|----------------|--------------|------------------------------|----------------------|------------------|---------------------|-----------------------------------------------------------------------------------------------------------|---------------------------------------------------------|------------------|------------|
| No of studies                                                                                        | Study design        | Risk of bias | Inconsistency  | Indirectness | Imprecision                  | Other considerations | pre-habilitation | no pre-habilitation | Relative (95% CI)                                                                                         | Absolute (95% CI)                                       |                  |            |
| 1<br>Reddy<br>2020                                                                                   | randomised<br>trial | very serious | not assessable | not serious  | very serious <sup>a, c</sup> | none                 | 20               | 21                  | SDs are not reported. The authors reported no statistically significant difference between the two groups |                                                         | ⊕○○○<br>Very low | CRITICAL   |
| <b>PROM - Modified Cincinnati total score (better indicated by higher values) – 3 months post-op</b> |                     |              |                |              |                              |                      |                  |                     |                                                                                                           |                                                         |                  |            |
| 1<br>Shaarani<br>2013                                                                                | randomised<br>trial | very serious | not assessable | not serious  | very serious <sup>a, b</sup> | none                 | 14               | 9                   | SMD 0.36 higher<br>(0.49 lower to 1.2 higher)                                                             |                                                         | ⊕○○○<br>Very low | CRITICAL   |
| <b>PROM - Lysholm score – 6 months post-op</b>                                                       |                     |              |                |              |                              |                      |                  |                     |                                                                                                           |                                                         |                  |            |
| 1<br>Reddy<br>2020                                                                                   | randomised<br>trial | very serious | not assessable | not serious  | very serious <sup>a, c</sup> | none                 | 20               | 21                  | SDs are not reported. The authors reported no statistically significant difference between the two groups |                                                         | ⊕○○○<br>Very low | CRITICAL   |
| <b>Return to sport</b>                                                                               |                     |              |                |              |                              |                      |                  |                     |                                                                                                           |                                                         |                  |            |
| 1                                                                                                    |                     |              |                |              |                              |                      |                  |                     |                                                                                                           |                                                         |                  |            |
| <b>Time to return to sport (better indicated by lower values)</b>                                    |                     |              |                |              |                              |                      |                  |                     |                                                                                                           |                                                         |                  |            |
| 1<br>Shaarani<br>2013                                                                                | randomised<br>trial | very serious | not assessable | not serious  | very serious <sup>a, b</sup> | none                 | 14               | 9                   | SMD 1.11 lower<br>(2.01 lower to 0.2 lower)                                                               |                                                         | ⊕○○○<br>Very low | CRITICAL   |
| <b>Laxity</b>                                                                                        |                     |              |                |              |                              |                      |                  |                     |                                                                                                           |                                                         |                  |            |
| 1                                                                                                    |                     |              |                |              |                              |                      |                  |                     |                                                                                                           |                                                         |                  |            |
| <b>Laxity - patients with Lachman grade I – 6 months post-op</b>                                     |                     |              |                |              |                              |                      |                  |                     |                                                                                                           |                                                         |                  |            |
| 1<br>Reddy<br>2020                                                                                   | randomised<br>trial | very serious | not assessable | not serious  | very serious <sup>a, d</sup> | none                 | 19/20<br>(95.0%) | 19/21<br>(90.5%)    | RR 1.05<br>(0.88 to<br>1.25)                                                                              | 45 more per<br>1,000<br>(from 109 fewer<br>to 226 more) | ⊕○○○<br>Very low | CRITICAL   |
| <b>Laxity - patients with Lachman grade II – 6 months post-op</b>                                    |                     |              |                |              |                              |                      |                  |                     |                                                                                                           |                                                         |                  |            |
| 1<br>Reddy<br>2020                                                                                   | randomised<br>trial | very serious | not assessable | not serious  | very serious <sup>a, d</sup> | none                 | 1/20 (5.0%)      | 2/21 (9.5%)         | RR 0.53<br>(0.05 to<br>5.35)                                                                              | 45 fewer per<br>1,000<br>(from 90 fewer<br>to 414 more) | ⊕○○○<br>Very low | CRITICAL   |
| <b>Adverse events</b>                                                                                |                     |              |                |              |                              |                      |                  |                     |                                                                                                           |                                                         |                  |            |
| Shaarani<br>2013                                                                                     |                     |              |                |              |                              |                      |                  |                     | None reported                                                                                             |                                                         |                  | CRITICAL   |
| Kim 2015                                                                                             |                     |              |                |              |                              |                      |                  |                     | None reported                                                                                             |                                                         |                  | CRITICAL   |
| Reddy<br>2020                                                                                        |                     |              |                |              |                              |                      |                  |                     | None reported                                                                                             |                                                         |                  | CRITICAL   |

CI: confidence interval; SMD: standardised mean difference; RR: risk ratio

- a. Total participants <800  
b. 95% CI of an SMD extends > 0.5 points in either direction  
c. Not reporting results or SDs  
d. 95% CI boundaries cross the arbitrary thresholds of 0.75 and 1.25

## Perturbation at pre-habilitation versus no perturbation in rehabilitation after ACLR

Bibliography: Hartigan 2009, Hartigan 2010

| Certainty assessment                                                                               |                  |              |                |              |                             |                      | № of patients                  |                  | Effect                                          |                   | Certainty        | Importance |
|----------------------------------------------------------------------------------------------------|------------------|--------------|----------------|--------------|-----------------------------|----------------------|--------------------------------|------------------|-------------------------------------------------|-------------------|------------------|------------|
| № of studies                                                                                       | Study design     | Risk of bias | Inconsistency  | Indirectness | Imprecision                 | Other considerations | Perturbation+ pre-habilitation | Pre-habilitation | Relative (95% CI)                               | Absolute (95% CI) |                  |            |
| <b>Strength</b>                                                                                    |                  |              |                |              |                             |                      |                                |                  |                                                 |                   |                  |            |
| 1                                                                                                  |                  |              |                |              |                             |                      |                                |                  |                                                 |                   |                  |            |
| <b>Strength - Quadriceps ISOM (better indicated by higher values) – 3 months post-op</b>           |                  |              |                |              |                             |                      |                                |                  |                                                 |                   |                  |            |
| 1<br>Hartigan 2010                                                                                 | randomised trial | very serious | not assessable | not serious  | very serious <sup>a,b</sup> | none                 | 18                             | 22               | SMD 0.26 lower<br>(0.88 lower to 0.37 higher)   |                   | ⊕○○○<br>Very low | CRITICAL   |
| <b>Strength - Quadriceps ISOM (better indicated by higher values) – 6 months post-op</b>           |                  |              |                |              |                             |                      |                                |                  |                                                 |                   |                  |            |
| 1<br>Hartigan 2010                                                                                 | randomised trial | very serious | not assessable | not serious  | very serious <sup>a,b</sup> | none                 | 18                             | 22               | SMD 0.23 higher<br>(0.40 lower to 0.85 higher)  |                   | ⊕○○○<br>Very low | CRITICAL   |
| <b>Strength - Quadriceps ISOM (better indicated by higher values) – 1 year post-op</b>             |                  |              |                |              |                             |                      |                                |                  |                                                 |                   |                  |            |
| 1<br>Hartigan 2010                                                                                 | randomised trial | very serious | not assessable | not serious  | very serious <sup>a,b</sup> | none                 | 18                             | 22               | SMD 0.05 higher<br>(0.57 lower to 0.67 higher)  |                   | ⊕○○○<br>Very low | CRITICAL   |
| <b>Patient reported outcomes (PROM)</b>                                                            |                  |              |                |              |                             |                      |                                |                  |                                                 |                   |                  |            |
| 1                                                                                                  |                  |              |                |              |                             |                      |                                |                  |                                                 |                   |                  |            |
| <b>PROM - KOS-ADLS (better indicated by higher values) – 3 months post-op</b>                      |                  |              |                |              |                             |                      |                                |                  |                                                 |                   |                  |            |
| 1<br>Hartigan 2010                                                                                 | randomised trial | very serious | not assessable | not serious  | very serious <sup>a,b</sup> | none                 | 18                             | 22               | SMD 0.12 higher<br>(0.51 lower to 0.74 higher)  |                   | ⊕○○○<br>Very low | CRITICAL   |
| <b>PROM - Global Rating Scale (better indicated by higher values) – 3 months post-op</b>           |                  |              |                |              |                             |                      |                                |                  |                                                 |                   |                  |            |
| 1<br>Hartigan 2010                                                                                 | randomised trial | very serious | not assessable | not serious  | very serious <sup>a,b</sup> | none                 | 18                             | 22               | SMD 0.43 higher<br>(0.2 lower to 1.06 higher)   |                   | ⊕○○○<br>Very low | CRITICAL   |
| <b>PROM - KOS-ADLS (better indicated by higher values) – 6 months post-op</b>                      |                  |              |                |              |                             |                      |                                |                  |                                                 |                   |                  |            |
| 1<br>Hartigan 2010                                                                                 | randomised trial | very serious | not assessable | not serious  | very serious <sup>a,b</sup> | none                 | 18                             | 22               | SMD 0.67 higher<br>(0.03 higher to 1.32 higher) |                   | ⊕○○○<br>Very low | CRITICAL   |
| <b>PROM - Global Rating Scale (better indicated by higher values) – 6 months post-op</b>           |                  |              |                |              |                             |                      |                                |                  |                                                 |                   |                  |            |
| 1<br>Hartigan 2010                                                                                 | randomised trial | very serious | not assessable | not serious  | very serious <sup>a,b</sup> | none                 | 18                             | 22               | SMD 0.65 higher<br>(0.01 higher to 1.29 higher) |                   | ⊕○○○<br>Very low | CRITICAL   |
| <b>PROM - KOS-ADLS (better indicated by higher values) – 1 year post-op</b>                        |                  |              |                |              |                             |                      |                                |                  |                                                 |                   |                  |            |
| 1<br>Hartigan 2010                                                                                 | randomised trial | very serious | not assessable | not serious  | very serious <sup>a,b</sup> | none                 | 18                             | 22               | SMD 0.09 lower<br>(0.71 lower to 0.54 higher)   |                   | ⊕○○○<br>Very low | CRITICAL   |
| <b>PROM - Global Rating Scale (better indicated by higher values) – 1 year post-op</b>             |                  |              |                |              |                             |                      |                                |                  |                                                 |                   |                  |            |
| 1<br>Hartigan 2010                                                                                 | randomised trial | very serious | not assessable | not serious  | very serious <sup>a,b</sup> | none                 | 18                             | 22               | SMD 0.56 higher<br>(0.08 lower to 1.19 higher)  |                   | ⊕○○○<br>Very low | CRITICAL   |
| <b>Functional activities</b>                                                                       |                  |              |                |              |                             |                      |                                |                  |                                                 |                   |                  |            |
| 2                                                                                                  |                  |              |                |              |                             |                      |                                |                  |                                                 |                   |                  |            |
| <b>Functional - single hop for distance (better indicated by higher values) – 3 months post-op</b> |                  |              |                |              |                             |                      |                                |                  |                                                 |                   |                  |            |
| 1<br>Hartigan 2010                                                                                 | randomised trial | very serious | not assessable | not serious  | very serious <sup>a,b</sup> | none                 | 18                             | 22               | SMD 0.06 higher<br>(0.56 lower to 0.69 higher)  |                   | ⊕○○○<br>Very low | IMPORTANT  |
| <b>Functional - triple hop for distance (better indicated by higher values) – 3 months post-op</b> |                  |              |                |              |                             |                      |                                |                  |                                                 |                   |                  |            |
| 1<br>Hartigan 2010                                                                                 | randomised trial | very serious | not assessable | not serious  | very serious <sup>a,b</sup> | none                 | 18                             | 22               | SMD 0.6 lower<br>(1.23 lower to 0.04 higher)    |                   | ⊕○○○<br>Very low | IMPORTANT  |
| <b>Functional - crossover hop (better indicated by higher values) – 3 months post-op</b>           |                  |              |                |              |                             |                      |                                |                  |                                                 |                   |                  |            |

33

Aspetar clinical practice guideline on rehabilitation after ACLR: Supplementary file

| Certainty assessment                                                                                               |                  |              |                |              |                             |                      | No of patients                |                  | Effect                                        |                   | Certainty        | Importance |
|--------------------------------------------------------------------------------------------------------------------|------------------|--------------|----------------|--------------|-----------------------------|----------------------|-------------------------------|------------------|-----------------------------------------------|-------------------|------------------|------------|
| No of studies                                                                                                      | Study design     | Risk of bias | Inconsistency  | Indirectness | Imprecision                 | Other considerations | Perturbation+pre-habilitation | Pre-habilitation | Relative (95% CI)                             | Absolute (95% CI) |                  |            |
| 1<br>Hartigan 2010                                                                                                 | randomised trial | very serious | not assessable | not serious  | very serious <sup>a,b</sup> | none                 | 18                            | 22               | SMD 0.42 lower<br>(1.05 lower to 0.21 higher) |                   | ⊕○○○<br>Very low | IMPORTANT  |
| <b>Functional - 6-meter timed hop (better indicated by higher values) – 3 months post-op</b>                       |                  |              |                |              |                             |                      |                               |                  |                                               |                   |                  |            |
| 1<br>Hartigan 2010                                                                                                 | randomised trial | very serious | not assessable | not serious  | very serious <sup>a,b</sup> | none                 | 18                            | 22               | SMD 0.06 lower<br>(0.68 lower to 0.56 higher) |                   | ⊕○○○<br>Very low | IMPORTANT  |
| <b>Functional - knee excursion at mid-stance of gait at (better indicated by higher values) – 6 months post-op</b> |                  |              |                |              |                             |                      |                               |                  |                                               |                   |                  |            |
| 1<br>Hartigan 2009                                                                                                 | randomised trial | very serious | not assessable | not serious  | very serious <sup>a,b</sup> | none                 | 9                             | 10               | SMD 0.5 higher<br>(0.42 lower to 1.42 higher) |                   | ⊕○○○<br>Very low | IMPORTANT  |
| <b>Functional - single hop for distance (better indicated by higher values) – 6 months post-op</b>                 |                  |              |                |              |                             |                      |                               |                  |                                               |                   |                  |            |
| 1<br>Hartigan 2010                                                                                                 | randomised trial | very serious | not assessable | not serious  | very serious <sup>a,b</sup> | none                 | 18                            | 22               | SMD 0.04 lower<br>(0.66 lower to 0.58 higher) |                   | ⊕○○○<br>Very low | IMPORTANT  |
| <b>Functional - triple hop for distance (better indicated by higher values) – 6 months post-op</b>                 |                  |              |                |              |                             |                      |                               |                  |                                               |                   |                  |            |
| 1<br>Hartigan 2010                                                                                                 | randomised trial | very serious | not assessable | not serious  | very serious <sup>a,b</sup> | none                 | 18                            | 22               | SMD 0.28 lower<br>(0.91 lower to 0.35 higher) |                   | ⊕○○○<br>Very low | IMPORTANT  |
| <b>Functional - crossover hop (better indicated by higher values) – 6 months post-op</b>                           |                  |              |                |              |                             |                      |                               |                  |                                               |                   |                  |            |
| 1<br>Hartigan 2010                                                                                                 | randomised trial | very serious | not assessable | not serious  | very serious <sup>a,b</sup> | none                 | 18                            | 22               | SMD 0.25 lower<br>(0.88 lower to 0.37 higher) |                   | ⊕○○○<br>Very low | IMPORTANT  |
| <b>Functional - 6-meter timed hop (better indicated by higher values) – 6 months post-op</b>                       |                  |              |                |              |                             |                      |                               |                  |                                               |                   |                  |            |
| 1<br>Hartigan 2010                                                                                                 | randomised trial | very serious | not assessable | not serious  | very serious <sup>a,b</sup> | none                 | 18                            | 22               | SMD 0.54 lower<br>(1.17 lower to 0.1 higher)  |                   | ⊕○○○<br>Very low | IMPORTANT  |
| <b>Functional - single hop for distance (better indicated by higher values) – 1 year post-op</b>                   |                  |              |                |              |                             |                      |                               |                  |                                               |                   |                  |            |
| 1<br>Hartigan 2010                                                                                                 | randomised trial | very serious | not assessable | not serious  | very serious <sup>a,b</sup> | none                 | 18                            | 22               | SMD 0.43 lower<br>(1.06 lower to 0.2 higher)  |                   | ⊕○○○<br>Very low | IMPORTANT  |
| <b>Functional - triple hop for distance (better indicated by higher values) – 1 year post-op</b>                   |                  |              |                |              |                             |                      |                               |                  |                                               |                   |                  |            |
| 1<br>Hartigan 2010                                                                                                 | randomised trial | very serious | not assessable | not serious  | very serious <sup>a,b</sup> | none                 | 18                            | 22               | SMD 0.47 lower<br>(1.11 lower to 0.16 higher) |                   | ⊕○○○<br>Very low | IMPORTANT  |
| <b>Functional - crossover hop (better indicated by higher values) – 1 year post-op</b>                             |                  |              |                |              |                             |                      |                               |                  |                                               |                   |                  |            |
| 1<br>Hartigan 2010                                                                                                 | randomised trial | very serious | not assessable | not serious  | very serious <sup>a,b</sup> | none                 | 18                            | 22               | SMD 0.14 lower<br>(0.76 lower to 0.48 higher) |                   | ⊕○○○<br>Very low | IMPORTANT  |
| <b>Functional - 6-meter timed hop (better indicated by higher values) – 1 year post-op</b>                         |                  |              |                |              |                             |                      |                               |                  |                                               |                   |                  |            |
| 1<br>Hartigan 2010                                                                                                 | randomised trial | very serious | not assessable | not serious  | very serious <sup>a,b</sup> | none                 | 18                            | 22               | SMD 0.94 lower<br>(1.6 lower to 0.28 lower)   |                   | ⊕○○○<br>Very low | IMPORTANT  |
| <b>Adverse events</b>                                                                                              |                  |              |                |              |                             |                      |                               |                  |                                               |                   |                  |            |
| Hartigan 2009                                                                                                      |                  |              |                |              |                             |                      |                               |                  | None reported                                 |                   |                  | CRITICAL   |
| Hartigan 2010                                                                                                      |                  |              |                |              |                             |                      |                               |                  | None reported                                 |                   |                  | CRITICAL   |

CI: confidence interval; SMD: standardised mean difference

- a. Total participants <800
- b. 95% CI of an SMD extends > 0.5 points in either direction
- c. Not reporting results or SDs

## Unsupervised versus supervised rehabilitation after ACLR

Bibliography: Schenck 1997, Beard 1998, Fischer 1998, Grant 2005, Ugutmen 2008, Revenas 2009, Grant 2010, Hohmann 2011, Lim 2019

| Certainty assessment                                                                                    |                      |              |                                     |              |                             |                      | № of patients               |                           | Effect                                          |                   | Certainty | Importance |
|---------------------------------------------------------------------------------------------------------|----------------------|--------------|-------------------------------------|--------------|-----------------------------|----------------------|-----------------------------|---------------------------|-------------------------------------------------|-------------------|-----------|------------|
| № of studies                                                                                            | Study design         | Risk of bias | Inconsistency                       | Indirectness | Imprecision                 | Other considerations | Unsupervised rehabilitation | Supervised rehabilitation | Relative (95% CI)                               | Absolute (95% CI) |           |            |
| <b>Strength</b>                                                                                         |                      |              |                                     |              |                             |                      |                             |                           |                                                 |                   |           |            |
| 6                                                                                                       |                      |              |                                     |              |                             |                      |                             |                           |                                                 |                   |           |            |
| <b>Strength - Quadriceps ISOM 30° (better indicated by higher values) – 3 months post-op</b>            |                      |              |                                     |              |                             |                      |                             |                           |                                                 |                   |           |            |
| 1<br>Hohmann<br>2011                                                                                    | randomised<br>trial  | serious      | not assessable                      | not serious  | very serious <sup>a,b</sup> | none                 | 20                          | 20                        | SMD 0.88 higher<br>(0.23 higher to 1.53 higher) | ⊕○○○<br>Very low  |           | CRITICAL   |
| <b>Strength - Quadriceps CON 60°/s LSI% (better indicated by higher values) – 3 months post-op</b>      |                      |              |                                     |              |                             |                      |                             |                           |                                                 |                   |           |            |
| 1<br>Beard 1998                                                                                         | randomised<br>trial  | serious      | not assessable                      | not serious  | very serious <sup>a,b</sup> | none                 | 13                          | 13                        | SMD 0.42 lower<br>(1.20 lower to 0.36 higher)   | ⊕○○○<br>Very low  |           | CRITICAL   |
| <b>Strength - Quadriceps CON 120-180°/s LSI% (better indicated by higher values) – 3 months post-op</b> |                      |              |                                     |              |                             |                      |                             |                           |                                                 |                   |           |            |
| 2<br>Grant 2005<br>Hohmann<br>2011                                                                      | randomised<br>trials | serious      | not serious<br>I <sup>2</sup> =0%   | not serious  | serious <sup>a</sup>        | none                 | 83                          | 83                        | SMD 0.07 higher<br>(0.24 lower to 0.37 higher)  | ⊕⊕○○<br>Low       |           | CRITICAL   |
| <b>Strength - Quadriceps ECC 120°/s LSI% (better indicated by higher values) – 3 months post-op</b>     |                      |              |                                     |              |                             |                      |                             |                           |                                                 |                   |           |            |
| 1<br>Hohmann<br>2011                                                                                    | randomised<br>trial  | serious      | not assessable                      | not serious  | very serious <sup>a,b</sup> | none                 | 20                          | 20                        | SMD 0.18 lower<br>(0.8 lower to 0.44 higher)    | ⊕○○○<br>Very low  |           | CRITICAL   |
| <b>Strength - Quadriceps ISOM 30-60° LSI% (better indicated by higher values) – 6 months post-op</b>    |                      |              |                                     |              |                             |                      |                             |                           |                                                 |                   |           |            |
| 2<br>Hohmann<br>2011<br>Revenas<br>2009                                                                 | randomised<br>trials | very serious | very serious<br>I <sup>2</sup> =79% | not serious  | very serious <sup>a,b</sup> | none                 | 44                          | 34                        | SMD 0.23 lower<br>(1.23 lower to 0.78 higher)   | ⊕○○○<br>Very low  |           | CRITICAL   |
| <b>Strength - Quadriceps CON 60°/s LSI% (better indicated by higher values) – 6 months post-op</b>      |                      |              |                                     |              |                             |                      |                             |                           |                                                 |                   |           |            |
| 1<br>Beard 1998                                                                                         | randomised<br>trial  | serious      | not assessable                      | not serious  | very serious <sup>a,b</sup> | none                 | 13                          | 13                        | SMD 0.51 lower<br>(1.29 lower to 0.28 higher)   | ⊕○○○<br>Very low  |           | CRITICAL   |
| <b>Strength - Quadriceps work CON 60°/s (better indicated by higher values) – 6 months post-op</b>      |                      |              |                                     |              |                             |                      |                             |                           |                                                 |                   |           |            |
| 1<br>Lim 2019                                                                                           | randomised<br>trial  | very serious | not assessable                      | not serious  | very serious <sup>a,b</sup> | none                 | 14                          | 12                        | SMD 0.97 higher<br>(0.15 higher to 1.79 higher) | ⊕○○○<br>Very low  |           | CRITICAL   |
| <b>Strength - Quadriceps CON 120-180°/s (better indicated by higher values) – 6 months post-op</b>      |                      |              |                                     |              |                             |                      |                             |                           |                                                 |                   |           |            |
| 2<br>Hohmann<br>2011<br>Lim 2019                                                                        | randomised<br>trials | very serious | not serious<br>I <sup>2</sup> =45%  | not serious  | very serious <sup>a,b</sup> | none                 | 34                          | 32                        | SMD 0.19 higher<br>(0.48 lower to 0.86 higher)  | ⊕○○○<br>Very low  |           | CRITICAL   |
| <b>Strength - Quadriceps ECC 120°/s LSI% (better indicated by higher values) – 6 months post-op</b>     |                      |              |                                     |              |                             |                      |                             |                           |                                                 |                   |           |            |
| 1<br>Hohmann<br>2011                                                                                    | randomised<br>trial  | serious      | not assessable                      | not serious  | very serious <sup>a,b</sup> | none                 | 20                          | 20                        | SMD 0.81 lower<br>(1.46 lower to 0.16 lower)    | ⊕○○○<br>Very low  |           | CRITICAL   |
| <b>Strength - Quadriceps ISOM 30° LSI% (better indicated by higher values) – 9 months post-op</b>       |                      |              |                                     |              |                             |                      |                             |                           |                                                 |                   |           |            |
| 1<br>Hohmann<br>2011                                                                                    | randomised<br>trial  | serious      | not assessable                      | not serious  | very serious <sup>a,b</sup> | none                 | 20                          | 20                        | SMD 0.25 lower<br>(0.87 lower to 0.37 higher)   | ⊕○○○<br>Very low  |           | CRITICAL   |
| <b>Strength - Quadriceps CON 120°/s LSI% (better indicated by higher values) – 9 months post-op</b>     |                      |              |                                     |              |                             |                      |                             |                           |                                                 |                   |           |            |
| 1<br>Hohmann<br>2011                                                                                    | randomised<br>trial  | serious      | not assessable                      | not serious  | very serious <sup>a,b</sup> | none                 | 20                          | 20                        | SMD 1.17 lower<br>(1.84 lower to 0.49 lower)    | ⊕○○○<br>Very low  |           | CRITICAL   |
| <b>Strength - Quadriceps ECC 120°/s LSI% (better indicated by higher values) – 9 months post-op</b>     |                      |              |                                     |              |                             |                      |                             |                           |                                                 |                   |           |            |
| 1<br>Hohmann<br>2011                                                                                    | randomised<br>trial  | serious      | not assessable                      | not serious  | very serious <sup>a,b</sup> | none                 | 20                          | 20                        | SMD 0.11 lower<br>(0.73 lower to 0.51 higher)   | ⊕○○○<br>Very low  |           | CRITICAL   |
| <b>Strength - Quadriceps ISOM 30-60° LSI% (better indicated by higher values) – 1 year post-op</b>      |                      |              |                                     |              |                             |                      |                             |                           |                                                 |                   |           |            |

| Certainty assessment                                                                                   |                   |              |                                   |              |                             |                      | No of patients              |                           | Effect                                         |                   | Certainty        | Importance |
|--------------------------------------------------------------------------------------------------------|-------------------|--------------|-----------------------------------|--------------|-----------------------------|----------------------|-----------------------------|---------------------------|------------------------------------------------|-------------------|------------------|------------|
| No of studies                                                                                          | Study design      | Risk of bias | Inconsistency                     | Indirectness | Imprecision                 | Other considerations | Unsupervised rehabilitation | Supervised rehabilitation | Relative (95% CI)                              | Absolute (95% CI) |                  |            |
| 2<br>Hohmann 2011<br>Revenas 2009                                                                      | randomised trials | very serious | not serious<br>I <sup>2</sup> =0% | not serious  | serious <sup>a</sup>        | none                 | 44                          | 34                        | SMD 0.41 lower<br>(0.86 lower to 0.05 higher)  |                   | ⊕○○○<br>Very low | CRITICAL   |
| <b>Strength - Quadriceps CON 120-180°/s LSI% (better indicated by higher values) – 1 year post-op</b>  |                   |              |                                   |              |                             |                      |                             |                           |                                                |                   |                  |            |
| 1<br>Hohmann 2011                                                                                      | randomised trial  | serious      | not assessable                    | not serious  | very serious <sup>a,b</sup> | none                 | 20                          | 20                        | SMD 0.16 lower<br>(0.78 lower to 0.46 higher)  |                   | ⊕○○○<br>Very low | CRITICAL   |
| <b>Strength - Quadriceps ECC 120°/s LSI% (better indicated by higher values) – 1 year post-op</b>      |                   |              |                                   |              |                             |                      |                             |                           |                                                |                   |                  |            |
| 1<br>Hohmann 2011                                                                                      | randomised trial  | serious      | not assessable                    | not serious  | very serious <sup>a,b</sup> | none                 | 20                          | 20                        | SMD 0.42 lower<br>(1.05 lower to 0.2 higher)   |                   | ⊕○○○<br>Very low | CRITICAL   |
| <b>Strength - Quadriceps CON 60°/s LSI% (better indicated by higher values) – 3 years post-op</b>      |                   |              |                                   |              |                             |                      |                             |                           |                                                |                   |                  |            |
| 1<br>Grant 2010                                                                                        | randomised trial  | serious      | not assessable                    | not serious  | very serious <sup>a,b</sup> | none                 | 26                          | 34                        | SMD 0.31 lower<br>(0.83 lower to 0.20 higher)  |                   | ⊕○○○<br>Very low | CRITICAL   |
| <b>Strength - Hamstring ISOM 30° LSI% (better indicated by higher values) – 3 months post-op</b>       |                   |              |                                   |              |                             |                      |                             |                           |                                                |                   |                  |            |
| 1<br>Hohmann 2011                                                                                      | randomised trial  | serious      | not assessable                    | not serious  | very serious <sup>a,b</sup> | none                 | 20                          | 20                        | SMD 0.01 higher<br>(0.61 lower to 0.63 higher) |                   | ⊕○○○<br>Very low | CRITICAL   |
| <b>Strength - Hamstring CON 60°/s LSI% (better indicated by higher values) – 3 months post-op</b>      |                   |              |                                   |              |                             |                      |                             |                           |                                                |                   |                  |            |
| 1<br>Beard 1998                                                                                        | randomised trial  | serious      | not assessable                    | not serious  | very serious <sup>a,b</sup> | none                 | 13                          | 13                        | SMD 0.09 lower<br>(0.86 lower to 0.68 higher)  |                   | ⊕○○○<br>Very low | CRITICAL   |
| <b>Strength - Hamstring CON 120-180°/s LSI% (better indicated by higher values) – 3 months post-op</b> |                   |              |                                   |              |                             |                      |                             |                           |                                                |                   |                  |            |
| 2<br>Grant 2005<br>Hohmann 2011                                                                        | randomised trials | serious      | not serious<br>I <sup>2</sup> =0% | not serious  | serious <sup>a</sup>        | none                 | 83                          | 86                        | SMD 0.01 higher<br>(0.29 lower to 0.31 higher) |                   | ⊕⊕○○<br>Low      | CRITICAL   |
| <b>Strength - Hamstring ECC 120°/s LSI% (better indicated by higher values) – 3 months post-op</b>     |                   |              |                                   |              |                             |                      |                             |                           |                                                |                   |                  |            |
| 1<br>Hohmann 2011                                                                                      | randomised trial  | serious      | not assessable                    | not serious  | very serious <sup>a,b</sup> | none                 | 20                          | 20                        | SMD 0.29 lower<br>(0.91 lower to 0.33 higher)  |                   | ⊕○○○<br>Very low | CRITICAL   |
| <b>Strength - Hamstring ISOM 30° LSI% (better indicated by higher values) – 6 months post-op</b>       |                   |              |                                   |              |                             |                      |                             |                           |                                                |                   |                  |            |
| 1<br>Hohmann 2011                                                                                      | randomised trial  | serious      | not assessable                    | not serious  | very serious <sup>a,b</sup> | none                 | 20                          | 20                        | SMD 0.21 higher<br>(0.42 lower to 0.83 higher) |                   | ⊕○○○<br>Very low | CRITICAL   |
| <b>Strength - Hamstring CON 60°/s LSI% (better indicated by higher values) – 6 months post-op</b>      |                   |              |                                   |              |                             |                      |                             |                           |                                                |                   |                  |            |
| 1<br>Beard 1998                                                                                        | randomised trial  | serious      | not assessable                    | not serious  | very serious <sup>a,b</sup> | none                 | 13                          | 13                        | SMD 0.62 lower<br>(1.41 lower to 0.17 higher)  |                   | ⊕○○○<br>Very low | CRITICAL   |
| <b>Strength - Hamstring work CON 60°/s (better indicated by higher values) – 6 months post-op</b>      |                   |              |                                   |              |                             |                      |                             |                           |                                                |                   |                  |            |
| 1<br>Lim 2019                                                                                          | randomised trial  | very serious | not assessable                    | not serious  | very serious <sup>a,b</sup> | none                 | 14                          | 12                        | SMD 0.12 higher<br>(0.65 lower to 0.9 higher)  |                   | ⊕○○○<br>Very low | CRITICAL   |
| <b>Strength - Hamstring CON 120-180°/s (better indicated by higher values) – 6 months post-op</b>      |                   |              |                                   |              |                             |                      |                             |                           |                                                |                   |                  |            |
| 2<br>Hohmann 2011<br>Lim 2019                                                                          | randomised trials | very serious | not serious<br>I <sup>2</sup> =0% | not serious  | serious <sup>a</sup>        | none                 | 34                          | 32                        | SMD 0.15 lower<br>(0.63 lower to 0.34 higher)  |                   | ⊕○○○<br>Very low | CRITICAL   |
| <b>Strength - Hamstring ECC 120°/s LSI% (better indicated by higher values) – 6 months post-op</b>     |                   |              |                                   |              |                             |                      |                             |                           |                                                |                   |                  |            |
| 1<br>Hohmann 2011                                                                                      | randomised trial  | serious      | not assessable                    | not serious  | very serious <sup>a,b</sup> | none                 | 20                          | 20                        | SMD 0.29 higher<br>(0.33 lower to 0.92 higher) |                   | ⊕○○○<br>Very low | CRITICAL   |
| <b>Strength - Hamstring ISOM 30° LSI% (better indicated by higher values) – 9 months post-op</b>       |                   |              |                                   |              |                             |                      |                             |                           |                                                |                   |                  |            |
| 1<br>Hohmann 2011                                                                                      | randomised trial  | serious      | not assessable                    | not serious  | very serious <sup>a,b</sup> | none                 | 20                          | 20                        | SMD 0.16 lower<br>(0.78 lower to 0.47 higher)  |                   | ⊕○○○<br>Very low | CRITICAL   |
| <b>Strength - Hamstring CON 120°/s LSI% (better indicated by higher values) – 9 months post-op</b>     |                   |              |                                   |              |                             |                      |                             |                           |                                                |                   |                  |            |
| 1<br>Hohmann 2011                                                                                      | randomised trial  | serious      | not assessable                    | not serious  | very serious <sup>a,b</sup> | none                 | 20                          | 20                        | SMD 0.88 lower<br>(1.54 lower to 0.23 lower)   |                   | ⊕○○○<br>Very low | CRITICAL   |

| Certainty assessment                                                                                 |                      |              |                                     |              |                             |                      | No of patients              |                           | Effect                                                                                                                  |                   | Certainty | Importance |
|------------------------------------------------------------------------------------------------------|----------------------|--------------|-------------------------------------|--------------|-----------------------------|----------------------|-----------------------------|---------------------------|-------------------------------------------------------------------------------------------------------------------------|-------------------|-----------|------------|
| No of studies                                                                                        | Study design         | Risk of bias | Inconsistency                       | Indirectness | Imprecision                 | Other considerations | Unsupervised rehabilitation | Supervised rehabilitation | Relative (95% CI)                                                                                                       | Absolute (95% CI) |           |            |
| <b>Strength - Hamstring ECC 120°/s LSI% (better indicated by higher values) – 9 months post-op</b>   |                      |              |                                     |              |                             |                      |                             |                           |                                                                                                                         |                   |           |            |
| 1<br>Hohmann<br>2011                                                                                 | randomised<br>trial  | serious      | not assessable                      | not serious  | very serious <sup>a,b</sup> | none                 | 20                          | 20                        | SMD 0.29 higher<br>(0.33 lower to 0.92 higher)                                                                          | ⊕○○○<br>Very low  | CRITICAL  |            |
| <b>Strength - Hamstring ISOM 30° LSI% (better indicated by higher values) – 1 year post-op</b>       |                      |              |                                     |              |                             |                      |                             |                           |                                                                                                                         |                   |           |            |
| 1<br>Hohmann<br>2011                                                                                 | randomised<br>trial  | serious      | not assessable                      | not serious  | very serious <sup>a,b</sup> | none                 | 20                          | 20                        | SMD 0.48 lower<br>(1.11 lower to 0.15 higher)                                                                           | ⊕○○○<br>Very low  | CRITICAL  |            |
| <b>Strength - Hamstring CON 120-180°/s LSI% (better indicated by higher values) – 1 year post-op</b> |                      |              |                                     |              |                             |                      |                             |                           |                                                                                                                         |                   |           |            |
| 1<br>Hohmann<br>2011                                                                                 | randomised<br>trial  | serious      | not assessable                      | not serious  | very serious <sup>a,b</sup> | none                 | 20                          | 20                        | SMD 0.21 lower<br>(0.83 lower to 0.42 higher)                                                                           | ⊕○○○<br>Very low  | CRITICAL  |            |
| <b>Strength - Hamstring ECC 120°/s LSI% (better indicated by higher values) – 1 year post-op</b>     |                      |              |                                     |              |                             |                      |                             |                           |                                                                                                                         |                   |           |            |
| 1<br>Hohmann<br>2011                                                                                 | randomised<br>trial  | serious      | not assessable                      | not serious  | very serious <sup>a,b</sup> | none                 | 20                          | 20                        | SMD 0.11 higher<br>(0.51 lower to 0.74 higher)                                                                          | ⊕○○○<br>Very low  | CRITICAL  |            |
| <b>Strength - Hamstring CON 60°/s LSI% (better indicated by higher values) – 3 years post-op</b>     |                      |              |                                     |              |                             |                      |                             |                           |                                                                                                                         |                   |           |            |
| 1<br>Grant 2010                                                                                      | randomised<br>trial  | serious      | not assessable                      | not serious  | very serious <sup>a,b</sup> | none                 | 26                          | 34                        | SMD 0.07 higher<br>(0.44 lower to 0.59 higher)                                                                          | ⊕○○○<br>Very low  | CRITICAL  |            |
| <b>Range of motion (ROM)</b>                                                                         |                      |              |                                     |              |                             |                      |                             |                           |                                                                                                                         |                   |           |            |
| 6                                                                                                    |                      |              |                                     |              |                             |                      |                             |                           |                                                                                                                         |                   |           |            |
| <b>ROM - knee flexion (better indicated by higher values) – 4-6 weeks post-op</b>                    |                      |              |                                     |              |                             |                      |                             |                           |                                                                                                                         |                   |           |            |
| 1<br>Fischer<br>1998                                                                                 | randomised<br>trial  | very serious | not assessable                      | not serious  | very serious <sup>a,b</sup> | none                 | 27                          | 27                        | SMD 0.26 higher<br>(0.28 lower to 0.79 higher)                                                                          | ⊕○○○<br>Very low  | CRITICAL  |            |
| 1<br>Ugutmen<br>2008                                                                                 | randomised<br>trial  | very serious | not assessable                      | not serious  | very serious <sup>a,c</sup> | none                 | 52                          | 52                        | No significant difference<br>between groups                                                                             | ⊕○○○<br>Very low  | CRITICAL  |            |
| <b>ROM - knee flexion (better indicated by higher values) – 3 months post-op</b>                     |                      |              |                                     |              |                             |                      |                             |                           |                                                                                                                         |                   |           |            |
| 2<br>Fischer<br>1998<br>Grant 2005                                                                   | randomised<br>trials | very serious | very serious<br>I <sup>2</sup> =90% | not serious  | serious <sup>a,b</sup>      | none                 | 90                          | 93                        | SMD 0.09 lower<br>(1.09 lower to 0.91 higher)                                                                           | ⊕○○○<br>Very low  | CRITICAL  |            |
| 1<br>Ugutmen<br>2008                                                                                 | randomised<br>trial  | very serious | not assessable                      | not serious  | very serious <sup>a,c</sup> | none                 | 52                          | 52                        | No significant difference<br>between groups                                                                             | ⊕○○○<br>Very low  | CRITICAL  |            |
| <b>ROM - knee flexion (better indicated by higher values) – 6 months post-op</b>                     |                      |              |                                     |              |                             |                      |                             |                           |                                                                                                                         |                   |           |            |
| 2<br>Fischer<br>1998<br>Revenas<br>2009                                                              | randomised<br>trials | very serious | serious<br>I <sup>2</sup> =53%      | not serious  | very serious <sup>a,b</sup> | none                 | 51                          | 41                        | SMD 0.35 higher<br>(0.27 lower to 0.97 higher)                                                                          | ⊕○○○<br>Very low  | CRITICAL  |            |
| <b>ROM - knee flexion (better indicated by higher values) – 1 year post-op</b>                       |                      |              |                                     |              |                             |                      |                             |                           |                                                                                                                         |                   |           |            |
| 1<br>Revenas<br>2009                                                                                 | randomised<br>trial  | very serious | not assessable                      | not serious  | very serious <sup>a,b</sup> | none                 | 24                          | 14                        | SMD 0.34 lower<br>(1.00 lower to 0.32 higher)                                                                           | ⊕○○○<br>Very low  | CRITICAL  |            |
| Schenck<br>1997                                                                                      | randomised<br>trial  | very serious | not assessable                      | not serious  | very serious <sup>a,c</sup> | none                 | 22                          | 15                        | "Flexion averaged<br>132° at 1 year (both groups<br>together) and was not<br>significantly different between<br>groups" | ⊕○○○<br>Very low  | CRITICAL  |            |
| <b>ROM - knee flexion (better indicated by higher values) – 3 years post-op</b>                      |                      |              |                                     |              |                             |                      |                             |                           |                                                                                                                         |                   |           |            |
| 1<br>Grant 2010                                                                                      | randomised<br>trial  | serious      | not assessable                      | not serious  | serious <sup>a</sup>        | none                 | 30                          | 36                        | SMD 0.20 higher<br>(0.29 lower to 0.68 higher)                                                                          | ⊕⊕○○<br>Low       | CRITICAL  |            |
| <b>ROM - knee extension (better indicated by lower values) – 3 months post-op</b>                    |                      |              |                                     |              |                             |                      |                             |                           |                                                                                                                         |                   |           |            |
| 1<br>Grant 2005                                                                                      | randomised<br>trial  | serious      | not assessable                      | not serious  | serious <sup>a</sup>        | none                 | 63                          | 66                        | SMD 0.41 higher<br>(0.06 higher to 0.76 higher)                                                                         | ⊕⊕○○<br>Low       | CRITICAL  |            |
| <b>ROM - knee extension (better indicated by lower values) – 6 months post-op</b>                    |                      |              |                                     |              |                             |                      |                             |                           |                                                                                                                         |                   |           |            |
| 1<br>Revenas<br>2009                                                                                 | randomised<br>trial  | very serious | not assessable                      | not serious  | very serious <sup>a,b</sup> | none                 | 24                          | 14                        | SMD 0.28 lower<br>(0.94 lower to 0.38 higher)                                                                           | ⊕○○○<br>Very low  | CRITICAL  |            |

| Certainty assessment                                                                                        |                                                            |                   |               |                                     |             |                              | No of patients              |                           | Effect            |                                                                                                                                            | Certainty        | Importance |
|-------------------------------------------------------------------------------------------------------------|------------------------------------------------------------|-------------------|---------------|-------------------------------------|-------------|------------------------------|-----------------------------|---------------------------|-------------------|--------------------------------------------------------------------------------------------------------------------------------------------|------------------|------------|
| No of studies                                                                                               | Study design                                               | Risk of bias      | Inconsistency | Indirectness                        | Imprecision | Other considerations         | Unsupervised rehabilitation | Supervised rehabilitation | Relative (95% CI) | Absolute (95% CI)                                                                                                                          |                  |            |
| <b>ROM - knee extension (better indicated by lower values) – 1 year post-op</b>                             |                                                            |                   |               |                                     |             |                              |                             |                           |                   |                                                                                                                                            |                  |            |
| 1                                                                                                           | Revenas 2009                                               | randomised trial  | very serious  | not assessable                      | not serious | very serious <sup>a, b</sup> | none                        | 24                        | 14                | SMD 0.60 lower<br>(1.27 lower to 0.08 higher)                                                                                              | ⊕○○○<br>Very low | CRITICAL   |
| <b>ROM - knee extension (better indicated by lower values) – 3 years post-op</b>                            |                                                            |                   |               |                                     |             |                              |                             |                           |                   |                                                                                                                                            |                  |            |
| 1                                                                                                           | Grant 2010                                                 | randomised trial  | serious       | not assessable                      | not serious | serious <sup>a</sup>         | none                        | 30                        | 36                | SMD 0.38 lower<br>(0.87 lower to 0.11 higher)                                                                                              | ⊕⊕○○<br>Low      | CRITICAL   |
| <b>Patient reported outcomes (PROM)</b>                                                                     |                                                            |                   |               |                                     |             |                              |                             |                           |                   |                                                                                                                                            |                  |            |
| 9                                                                                                           |                                                            |                   |               |                                     |             |                              |                             |                           |                   |                                                                                                                                            |                  |            |
| <b>PROM - Lysholm (better indicated by higher values) – 3 months post-op</b>                                |                                                            |                   |               |                                     |             |                              |                             |                           |                   |                                                                                                                                            |                  |            |
| 3                                                                                                           | Beard 1998<br>Fischer 1998<br>Hohmann 2011                 | randomised trials | very serious  | not serious<br>I <sup>2</sup> =0%   | not serious | serious <sup>a</sup>         | none                        | 60                        | 60                | SMD 0.2 higher<br>(0.16 lower to 0.56 higher)                                                                                              | ⊕○○○<br>Very low | CRITICAL   |
| <b>PROM - Tegner (better indicated by higher values) – 3 months post-op</b>                                 |                                                            |                   |               |                                     |             |                              |                             |                           |                   |                                                                                                                                            |                  |            |
| 1                                                                                                           | Hohmann 2011                                               | randomised trial  | serious       | not assessable                      | not serious | very serious <sup>a, b</sup> | none                        | 20                        | 20                | SMD 0.4 lower<br>(1.03 lower to 0.23 higher)                                                                                               | ⊕○○○<br>Very low | CRITICAL   |
|                                                                                                             | Beard 1998                                                 | randomised trial  | serious       | not assessable                      | not serious | very serious <sup>a, c</sup> | none                        | 13                        | 13                | Authors report "no significant difference between groups for both the change of activity level for the study period and the final outcome" | ⊕○○○<br>Very low | CRITICAL   |
| <b>PROM - Lysholm (better indicated by higher values) – 6 months post-op</b>                                |                                                            |                   |               |                                     |             |                              |                             |                           |                   |                                                                                                                                            |                  |            |
| 4                                                                                                           | Beard 1998<br>Fischer 1998<br>Hohmann 2011<br>Revenas 2009 | randomised trials | very serious  | not serious<br>I <sup>2</sup> =40%  | not serious | serious <sup>a</sup>         | none                        | 84                        | 74                | SMD 0.18 lower<br>(0.6 lower to 0.23 higher)                                                                                               | ⊕○○○<br>Very low | CRITICAL   |
| <b>PROM - Tegner (better indicated by higher values) – 6 months post-op</b>                                 |                                                            |                   |               |                                     |             |                              |                             |                           |                   |                                                                                                                                            |                  |            |
| 3                                                                                                           | Beard 1998<br>Hohmann 2011<br>Revenas 2009                 | randomised trials | very serious  | not serious<br>I <sup>2</sup> =0%   | not serious | serious <sup>a</sup>         | none                        | 57                        | 47                | SMD 0.39 lower<br>(0.79 lower to 0)                                                                                                        | ⊕○○○<br>Very low | CRITICAL   |
| <b>PROM - Subjective health status questionnaire (better indicated by higher values) – 6 months post-op</b> |                                                            |                   |               |                                     |             |                              |                             |                           |                   |                                                                                                                                            |                  |            |
|                                                                                                             | Fischer 1998                                               | randomised trial  | very serious  | not assessable                      | not serious | very serious <sup>a, c</sup> | none                        | 27                        | 27                | No significant difference between groups                                                                                                   | ⊕○○○<br>Very low | CRITICAL   |
| <b>PROM - Lysholm (better indicated by higher values) – 9 months post-op</b>                                |                                                            |                   |               |                                     |             |                              |                             |                           |                   |                                                                                                                                            |                  |            |
| 1                                                                                                           | Hohmann 2011                                               | randomised trial  | serious       | not assessable                      | not serious | very serious <sup>a, b</sup> | none                        | 20                        | 20                | SMD 0.66 lower<br>(1.29 lower to 0.02 lower)                                                                                               | ⊕○○○<br>Very low | CRITICAL   |
| <b>PROM - Tegner (better indicated by higher values) – 9 months post-op</b>                                 |                                                            |                   |               |                                     |             |                              |                             |                           |                   |                                                                                                                                            |                  |            |
| 1                                                                                                           | Hohmann 2011                                               | randomised trial  | serious       | not assessable                      | not serious | very serious <sup>a, b</sup> | none                        | 20                        | 20                | SMD 0.37 lower<br>(0.99 lower to 0.26 higher)                                                                                              | ⊕○○○<br>Very low | CRITICAL   |
| <b>PROM - Lysholm (better indicated by higher values) – 1 year post-op</b>                                  |                                                            |                   |               |                                     |             |                              |                             |                           |                   |                                                                                                                                            |                  |            |
| 2                                                                                                           | Hohmann 2011<br>Revenas 2009                               | randomised trials | very serious  | very serious<br>I <sup>2</sup> =90% | not serious | very serious <sup>a, b</sup> | none                        | 44                        | 34                | SMD 0.52 higher<br>(1.18 lower to 2.22 higher)                                                                                             | ⊕○○○<br>Very low | CRITICAL   |

| Certainty assessment                                                                                        |                   |              |                                   |              |                             |                      | No of patients              |                           | Effect                                                                                                                                                                            |                   | Certainty | Importance |
|-------------------------------------------------------------------------------------------------------------|-------------------|--------------|-----------------------------------|--------------|-----------------------------|----------------------|-----------------------------|---------------------------|-----------------------------------------------------------------------------------------------------------------------------------------------------------------------------------|-------------------|-----------|------------|
| No of studies                                                                                               | Study design      | Risk of bias | Inconsistency                     | Indirectness | Imprecision                 | Other considerations | Unsupervised rehabilitation | Supervised rehabilitation | Relative (95% CI)                                                                                                                                                                 | Absolute (95% CI) |           |            |
| Schenck 1997                                                                                                | randomised trial  | very serious | not assessable                    | not serious  | very serious <sup>a,c</sup> | none                 | 22                          | 15                        | No SDs reported. No difference between groups.<br>"Lysholm data at 1 year was not significantly different between groups, averaging 93.8 in CB patients and 96.2 in HR patients." | ⊕○○○<br>Very low  | CRITICAL  |            |
| <b>PROM - Tegner (better indicated by higher values) – 1 year post-op</b>                                   |                   |              |                                   |              |                             |                      |                             |                           |                                                                                                                                                                                   |                   |           |            |
| 2<br>Hohmann 2011<br>Revenas 2009                                                                           | randomised trials | very serious | serious<br>I <sup>2</sup> =74%    | not serious  | very serious <sup>a,b</sup> | none                 | 44                          | 34                        | SMD <b>0.42 lower</b><br>(1.32 lower to 0.49 higher)                                                                                                                              | ⊕○○○<br>Very low  | CRITICAL  |            |
| <b>PROM - sickness impact profile (better indicated by higher values) – 1 year post-op</b>                  |                   |              |                                   |              |                             |                      |                             |                           |                                                                                                                                                                                   |                   |           |            |
| 1<br>Schenck 1997                                                                                           | randomised trial  | very serious | not assessable                    | not serious  | very serious <sup>a,b</sup> | none                 | 22                          | 15                        | SMD <b>0.39 higher</b><br>(0.27 lower to 1.05 higher)                                                                                                                             | ⊕○○○<br>Very low  | CRITICAL  |            |
| <b>PROM – Lysholm scale (better indicated by higher values) – last evaluation visit</b>                     |                   |              |                                   |              |                             |                      |                             |                           |                                                                                                                                                                                   |                   |           |            |
| 1<br>Ugutmen 2008                                                                                           | randomised trial  | very serious | not assessable                    | not serious  | very serious <sup>a,c</sup> | none                 | 52                          | 52                        | No significant difference between groups                                                                                                                                          | ⊕○○○<br>Very low  | CRITICAL  |            |
| <b>PROM - Mean ACL quality of life (better indicated by higher values) – 3 years post-op</b>                |                   |              |                                   |              |                             |                      |                             |                           |                                                                                                                                                                                   |                   |           |            |
| 1<br>Grant 2010                                                                                             | randomised trial  | serious      | not assessable                    | not serious  | serious <sup>a</sup>        | none                 | 40                          | 48                        | SMD <b>0.51 higher</b><br>(0.08 higher to 0.94 higher)                                                                                                                            | ⊕⊕○○<br>Low       | CRITICAL  |            |
| <b>Functional activities</b>                                                                                |                   |              |                                   |              |                             |                      |                             |                           |                                                                                                                                                                                   |                   |           |            |
| 4                                                                                                           |                   |              |                                   |              |                             |                      |                             |                           |                                                                                                                                                                                   |                   |           |            |
| <b>Functional - single leg hop for distance LSI% (better indicated by higher values) – 3 months post-op</b> |                   |              |                                   |              |                             |                      |                             |                           |                                                                                                                                                                                   |                   |           |            |
| 1<br>Hohmann 2011                                                                                           | randomised trial  | serious      | not assessable                    | not serious  | very serious <sup>a,b</sup> | none                 | 20                          | 20                        | SMD <b>0.02 higher</b><br>(0.6 lower to 0.64 higher)                                                                                                                              | ⊕○○○<br>Very low  | IMPORTANT |            |
| <b>Functional - timed hop LSI% (better indicated by higher values) – 3 months post-op</b>                   |                   |              |                                   |              |                             |                      |                             |                           |                                                                                                                                                                                   |                   |           |            |
| 1<br>Hohmann 2011                                                                                           | randomised trial  | serious      | not assessable                    | not serious  | very serious <sup>a,b</sup> | none                 | 20                          | 20                        | SMD <b>0.33 lower</b><br>(0.95 lower to 0.3 higher)                                                                                                                               | ⊕○○○<br>Very low  | IMPORTANT |            |
| <b>Functional - vertical hop LSI% (better indicated by higher values) – 3 months post-op</b>                |                   |              |                                   |              |                             |                      |                             |                           |                                                                                                                                                                                   |                   |           |            |
| 1<br>Hohmann 2011                                                                                           | randomised trial  | serious      | not assessable                    | not serious  | very serious <sup>a,b</sup> | none                 | 20                          | 20                        | SMD <b>0.39 lower</b><br>(1.02 lower to 0.23 higher)                                                                                                                              | ⊕○○○<br>Very low  | IMPORTANT |            |
| <b>Functional - single leg hop for distance (better indicated by higher values) – 6 months post-op</b>      |                   |              |                                   |              |                             |                      |                             |                           |                                                                                                                                                                                   |                   |           |            |
| 2<br>Hohmann 2011<br>Revenas 2009                                                                           | randomised trials | very serious | not serious<br>I <sup>2</sup> =0% | not serious  | serious <sup>a</sup>        | none                 | 44                          | 34                        | SMD <b>0.03 higher</b><br>(0.42 lower to 0.49 higher)                                                                                                                             | ⊕○○○<br>Very low  | IMPORTANT |            |
| Fischer 1998                                                                                                | randomised trial  | very serious | not assessable                    | not serious  | very serious <sup>a,c</sup> | none                 | 27                          | 27                        | No significant difference between groups                                                                                                                                          | ⊕○○○<br>Very low  | IMPORTANT |            |
| <b>Functional - timed hop (better indicated by higher values) – 6 months post-op</b>                        |                   |              |                                   |              |                             |                      |                             |                           |                                                                                                                                                                                   |                   |           |            |
| 1<br>Hohmann 2011                                                                                           | randomised trial  | serious      | not assessable                    | not serious  | very serious <sup>a,b</sup> | none                 | 20                          | 20                        | SMD <b>0.01 lower</b><br>(0.63 lower to 0.61 higher)                                                                                                                              | ⊕○○○<br>Very low  | IMPORTANT |            |
| Fischer 1998                                                                                                | randomised trial  | very serious | not assessable                    | not serious  | very serious <sup>a,c</sup> | none                 | 27                          | 27                        | No significant difference between groups                                                                                                                                          | ⊕○○○<br>Very low  | IMPORTANT |            |
| <b>Functional - vertical hop LSI% (better indicated by higher values) – 6 months post-op</b>                |                   |              |                                   |              |                             |                      |                             |                           |                                                                                                                                                                                   |                   |           |            |
| 1<br>Hohmann 2011                                                                                           | randomised trial  | serious      | not assessable                    | not serious  | very serious <sup>a,b</sup> | none                 | 20                          | 20                        | SMD <b>0.4 lower</b><br>(1.03 lower to 0.22 higher)                                                                                                                               | ⊕○○○<br>Very low  | IMPORTANT |            |
| <b>Functional - triple hop for distance (better indicated by higher values) – 6 months post-op</b>          |                   |              |                                   |              |                             |                      |                             |                           |                                                                                                                                                                                   |                   |           |            |
| 1<br>Fischer 1998                                                                                           | randomised trial  | very serious | not assessable                    | not serious  | very serious <sup>a,c</sup> | none                 | 27                          | 27                        | No significant difference between groups                                                                                                                                          | ⊕○○○<br>Very low  | IMPORTANT |            |
| <b>Functional - crossover hop for distance (better indicated by higher values) – 6 months post-op</b>       |                   |              |                                   |              |                             |                      |                             |                           |                                                                                                                                                                                   |                   |           |            |

| Certainty assessment                                                                                        |                   |              |                                   |              |                             |                      | No of patients              |                           | Effect                                                     |                   | Certainty        | Importance |
|-------------------------------------------------------------------------------------------------------------|-------------------|--------------|-----------------------------------|--------------|-----------------------------|----------------------|-----------------------------|---------------------------|------------------------------------------------------------|-------------------|------------------|------------|
| No of studies                                                                                               | Study design      | Risk of bias | Inconsistency                     | Indirectness | Imprecision                 | Other considerations | Unsupervised rehabilitation | Supervised rehabilitation | Relative (95% CI)                                          | Absolute (95% CI) |                  |            |
| 1<br>Fischer 1998                                                                                           | randomised trial  | very serious | not assessable                    | not serious  | very serious <sup>a,c</sup> | none                 | 27                          | 27                        | No significant difference between groups                   |                   | ⊕○○○<br>Very low | IMPORTANT  |
| <b>Functional - single leg hop for distance LSI% (better indicated by higher values) – 9 months post-op</b> |                   |              |                                   |              |                             |                      |                             |                           |                                                            |                   |                  |            |
| 1<br>Hohmann 2011                                                                                           | randomised trial  | serious      | not assessable                    | not serious  | very serious <sup>a,b</sup> | none                 | 20                          | 20                        | SMD 0.15 lower<br>(0.77 lower to 0.47 higher)              |                   | ⊕○○○<br>Very low | IMPORTANT  |
| <b>Functional - timed hop LSI% (better indicated by higher values) – 9 months post-op</b>                   |                   |              |                                   |              |                             |                      |                             |                           |                                                            |                   |                  |            |
| 1<br>Hohmann 2011                                                                                           | randomised trial  | serious      | not assessable                    | not serious  | very serious <sup>a,b</sup> | none                 | 20                          | 20                        | SMD 0.26 lower<br>(0.88 lower to 0.37 higher)              |                   | ⊕○○○<br>Very low | IMPORTANT  |
| <b>Functional - vertical hop (better indicated by higher values) – 9 months post-op</b>                     |                   |              |                                   |              |                             |                      |                             |                           |                                                            |                   |                  |            |
| 1<br>Hohmann 2011                                                                                           | randomised trial  | serious      | not assessable                    | not serious  | very serious <sup>a,b</sup> | none                 | 20                          | 20                        | SMD 0.44 higher<br>(0.19 lower to 1.07 higher)             |                   | ⊕○○○<br>Very low | IMPORTANT  |
| <b>Functional - single leg hop for distance (better indicated by higher values) – 1 year post-op</b>        |                   |              |                                   |              |                             |                      |                             |                           |                                                            |                   |                  |            |
| 2<br>Hohmann 2011<br>Revenas 2009                                                                           | randomised trials | very serious | not serious<br>I <sup>2</sup> =0% | not serious  | serious <sup>a</sup>        | none                 | 44                          | 34                        | SMD 0.03 lower<br>(0.48 lower to 0.42 higher)              |                   | ⊕○○○<br>Very low | IMPORTANT  |
| Schenck 1997                                                                                                | randomised trial  | very serious | not assessable                    | not serious  | very serious <sup>a,c</sup> | none                 | 22                          | 15                        | Authors reported no significant difference between groups. |                   | ⊕○○○<br>Very low | IMPORTANT  |
| <b>Functional - timed hop LSI% (better indicated by higher values) – 1 year post-op</b>                     |                   |              |                                   |              |                             |                      |                             |                           |                                                            |                   |                  |            |
| 1<br>Hohmann 2011                                                                                           | randomised trial  | serious      | not assessable                    | not serious  | very serious <sup>a,b</sup> | none                 | 20                          | 20                        | SMD 0.16 higher<br>(0.46 lower to 0.78 higher)             |                   | ⊕○○○<br>Very low | IMPORTANT  |
| <b>Functional - vertical hop LSI% (better indicated by higher values) – 1 year post-op</b>                  |                   |              |                                   |              |                             |                      |                             |                           |                                                            |                   |                  |            |
| 1<br>Hohmann 2011                                                                                           | randomised trial  | serious      | not assessable                    | not serious  | very serious <sup>a,b</sup> | none                 | 20                          | 20                        | SMD 0.47 lower<br>(1.1 lower to 0.16 higher)               |                   | ⊕○○○<br>Very low | IMPORTANT  |
| <b>Laxity</b>                                                                                               |                   |              |                                   |              |                             |                      |                             |                           |                                                            |                   |                  |            |
| 5                                                                                                           |                   |              |                                   |              |                             |                      |                             |                           |                                                            |                   |                  |            |
| <b>Laxity – between limbs difference (better indicated by lower values) – 3 months post-op</b>              |                   |              |                                   |              |                             |                      |                             |                           |                                                            |                   |                  |            |
| 2<br>Beard 1998<br>Grant 2005                                                                               | randomised trials | serious      | not serious<br>I <sup>2</sup> =3% | not serious  | serious <sup>a</sup>        | none                 | 76                          | 79                        | SMD 0.20 higher<br>(0.13 lower to 0.53 higher)             |                   | ⊕⊕○○<br>Low      | CRITICAL   |
| Fischer 1998                                                                                                | randomised trial  | very serious | not assessable                    | not serious  | very serious <sup>a,c</sup> | none                 | 27                          | 27                        | Authors reported no significant difference between groups. |                   | ⊕○○○<br>Very low | CRITICAL   |
| <b>Laxity - between limbs difference (better indicated by lower values) – 6 months post-op</b>              |                   |              |                                   |              |                             |                      |                             |                           |                                                            |                   |                  |            |
| 1<br>Beard 1998                                                                                             | randomised trial  | serious      | not assessable                    | not serious  | very serious <sup>a,b</sup> | none                 | 13                          | 13                        | SMD 0.64 higher<br>(0.15 lower to 1.43 higher)             |                   | ⊕○○○<br>Very low | CRITICAL   |
| Fischer 1998                                                                                                | randomised trial  | very serious | not assessable                    | not serious  | very serious <sup>a,c</sup> | none                 | 27                          | 27                        | Authors reported no significant difference between groups. |                   | ⊕○○○<br>Very low | CRITICAL   |
| <b>Laxity – 1 year post-op</b>                                                                              |                   |              |                                   |              |                             |                      |                             |                           |                                                            |                   |                  |            |
| 1<br>Schenck 1997                                                                                           | randomised trial  | very serious | not assessable                    | not serious  | very serious <sup>a,c</sup> | none                 | 22                          | 15                        | Authors reported no significant difference between groups. |                   | ⊕○○○<br>Very low | CRITICAL   |
| <b>Laxity - between limbs difference (better indicated by lower values) – 3 years post-op</b>               |                   |              |                                   |              |                             |                      |                             |                           |                                                            |                   |                  |            |
| 1<br>Grant 2010                                                                                             | randomised trial  | serious      | not assessable                    | not serious  | serious <sup>a</sup>        | none                 | 30                          | 35                        | SMD 0.41 lower<br>(0.90 lower to 0.09 higher)              |                   | ⊕⊕○○<br>Low      | CRITICAL   |
| <b>Proprioception</b>                                                                                       |                   |              |                                   |              |                             |                      |                             |                           |                                                            |                   |                  |            |
| 1                                                                                                           |                   |              |                                   |              |                             |                      |                             |                           |                                                            |                   |                  |            |
| <b>Proprioception - overall stability index (better indicated by lower values) – 6 months post-op</b>       |                   |              |                                   |              |                             |                      |                             |                           |                                                            |                   |                  |            |
| 1<br>Lim 2019                                                                                               | randomised trial  | very serious | not assessable                    | not serious  | very serious <sup>a,b</sup> | none                 | 14                          | 12                        | SMD 0.63 higher<br>(0.16 lower to 1.42 higher)             |                   | ⊕○○○<br>Very low | IMPORTANT  |

| Certainty assessment                                                                       |                     |              |                |              |                             |                      | No of patients              |                           | Effect                                                                                                                                                                      |                                                          | Certainty        | Importance |
|--------------------------------------------------------------------------------------------|---------------------|--------------|----------------|--------------|-----------------------------|----------------------|-----------------------------|---------------------------|-----------------------------------------------------------------------------------------------------------------------------------------------------------------------------|----------------------------------------------------------|------------------|------------|
| No of studies                                                                              | Study design        | Risk of bias | Inconsistency  | Indirectness | Imprecision                 | Other considerations | Unsupervised rehabilitation | Supervised rehabilitation | Relative (95% CI)                                                                                                                                                           | Absolute (95% CI)                                        |                  |            |
| <b>Pain</b>                                                                                |                     |              |                |              |                             |                      |                             |                           |                                                                                                                                                                             |                                                          |                  |            |
| 1                                                                                          |                     |              |                |              |                             |                      |                             |                           |                                                                                                                                                                             |                                                          |                  |            |
| <b>Pain – VAS scale – 1 year post-op</b>                                                   |                     |              |                |              |                             |                      |                             |                           |                                                                                                                                                                             |                                                          |                  |            |
| 1<br>Schenck<br>1997                                                                       | randomised<br>trial | very serious | not assessable | not serious  | very serious <sup>a,c</sup> | none                 | 22                          | 15                        | Not reported if there is any difference between groups<br>"VAS pain scores averaged 5.1 (range, 2 to 10) preoperatively for both groups and 0.89 (range, 0 to 6) at 1 year" |                                                          | ⊕○○○<br>Very low | CRITICAL   |
| <b>Atrophy</b>                                                                             |                     |              |                |              |                             |                      |                             |                           |                                                                                                                                                                             |                                                          |                  |            |
| 3                                                                                          |                     |              |                |              |                             |                      |                             |                           |                                                                                                                                                                             |                                                          |                  |            |
| <b>Atrophy - thigh circumference (better indicated by lower values) – 6 weeks post-op</b>  |                     |              |                |              |                             |                      |                             |                           |                                                                                                                                                                             |                                                          |                  |            |
| 1<br>Fischer<br>1998                                                                       | randomised<br>trial | very serious | not assessable | not serious  | very serious <sup>a,b</sup> | none                 | 27                          | 27                        | SMD 0.22 lower<br>(0.75 lower to 0.32 higher)                                                                                                                               |                                                          | ⊕○○○<br>Very low | CRITICAL   |
| <b>Atrophy - thigh circumference (better indicated by lower values) – 3 months post-op</b> |                     |              |                |              |                             |                      |                             |                           |                                                                                                                                                                             |                                                          |                  |            |
| 1<br>Fischer<br>1998                                                                       | randomised<br>trial | very serious | not assessable | not serious  | very serious <sup>a,b</sup> | none                 | 27                          | 27                        | SMD 0.17 lower<br>(0.7 lower to 0.37 higher)                                                                                                                                |                                                          | ⊕○○○<br>Very low | CRITICAL   |
| <b>Atrophy - thigh circumference (better indicated by lower values) – 4 months post-op</b> |                     |              |                |              |                             |                      |                             |                           |                                                                                                                                                                             |                                                          |                  |            |
| 1<br>Fischer<br>1998                                                                       | randomised<br>trial | very serious | not assessable | not serious  | very serious <sup>a,b</sup> | none                 | 27                          | 27                        | SMD 0.27 lower<br>(0.8 lower to 0.27 higher)                                                                                                                                |                                                          | ⊕○○○<br>Very low | CRITICAL   |
| <b>Atrophy - thigh circumference (better indicated by lower values) – 6 months post-op</b> |                     |              |                |              |                             |                      |                             |                           |                                                                                                                                                                             |                                                          |                  |            |
| 1<br>Fischer<br>1998                                                                       | randomised<br>trial | very serious | not assessable | not serious  | very serious <sup>a,b</sup> | none                 | 27                          | 27                        | SMD 0.15 lower<br>(0.68 lower to 0.38 higher)                                                                                                                               |                                                          | ⊕○○○<br>Very low | CRITICAL   |
| <b>Atrophy – quadriceps atrophy (method is not reported) – 1 year post-op</b>              |                     |              |                |              |                             |                      |                             |                           |                                                                                                                                                                             |                                                          |                  |            |
| 1<br>Schenck<br>1997                                                                       | randomised<br>trial | very serious | not assessable | not serious  | very serious <sup>a,c</sup> | none                 | 22                          | 15                        | Authors reported no significant difference between groups.                                                                                                                  |                                                          | ⊕○○○<br>Very low | CRITICAL   |
| <b>Atrophy - thigh atrophy – at the last examination visit</b>                             |                     |              |                |              |                             |                      |                             |                           |                                                                                                                                                                             |                                                          |                  |            |
| Ugutmen<br>2008                                                                            | randomised<br>trial | very serious | not assessable | not serious  | very serious <sup>a,c</sup> | none                 | 52                          | 52                        | Authors reported no significant difference between groups.                                                                                                                  |                                                          | ⊕○○○<br>Very low | CRITICAL   |
| <b>Laxity</b>                                                                              |                     |              |                |              |                             |                      |                             |                           |                                                                                                                                                                             |                                                          |                  |            |
| 1                                                                                          |                     |              |                |              |                             |                      |                             |                           |                                                                                                                                                                             |                                                          |                  |            |
| <b>laxity - patients with Lachman negative – 31 months post-op</b>                         |                     |              |                |              |                             |                      |                             |                           |                                                                                                                                                                             |                                                          |                  |            |
| 1<br>Ugutmen<br>2008                                                                       | randomised<br>trial | very serious | not assessable | not serious  | very serious <sup>a,d</sup> | none                 | 38/52 (73.1%)               | 36/52 (69.2%)             | RR 1.06<br>(0.83 to 1.35)                                                                                                                                                   | 42 more per<br>1,000<br>(from 118 fewer<br>to 242 more)  | ⊕○○○<br>Very low | CRITICAL   |
| <b>laxity - patients with Lachman grade I – 31 months post-op</b>                          |                     |              |                |              |                             |                      |                             |                           |                                                                                                                                                                             |                                                          |                  |            |
| 1<br>Ugutmen<br>2008                                                                       | randomised<br>trial | very serious | not assessable | not serious  | very serious <sup>a,d</sup> | none                 | 12/52 (23.1%)               | 14/52 (26.9%)             | RR 0.86<br>(0.44 to 1.67)                                                                                                                                                   | 38 fewer per<br>1,000<br>(from 151 fewer<br>to 180 more) | ⊕○○○<br>Very low | CRITICAL   |
| <b>laxity - patients with Lachman grade II – 31 months post-op</b>                         |                     |              |                |              |                             |                      |                             |                           |                                                                                                                                                                             |                                                          |                  |            |
| 1<br>Ugutmen<br>2008                                                                       | randomised<br>trial | very serious | not assessable | not serious  | very serious <sup>a,d</sup> | none                 | 2/52 (3.8%)                 | 2/52 (3.8%)               | RR 1.00<br>(0.15 to 6.83)                                                                                                                                                   | 0 fewer per<br>1,000<br>(from 33 fewer to<br>224 more)   | ⊕○○○<br>Very low | CRITICAL   |
| <b>laxity - patients with Lachman grade III – 31 months post-op</b>                        |                     |              |                |              |                             |                      |                             |                           |                                                                                                                                                                             |                                                          |                  |            |
| 1<br>Ugutmen<br>2008                                                                       | randomised<br>trial | very serious | not assessable | not serious  | serious <sup>a</sup>        | none                 | 0/52 (0.0%)                 | 0/52 (0.0%)               | Due to zero events in both study arms, an absolute risk reduction was not estimable                                                                                         |                                                          | ⊕○○○<br>Very low | CRITICAL   |
| <b>laxity - patients with Pivot shift negative – 31 months post-op</b>                     |                     |              |                |              |                             |                      |                             |                           |                                                                                                                                                                             |                                                          |                  |            |

| Certainty assessment                                                   |                     |              |                |              |                              |                      | No of patients              |                           | Effect                       |                                                                                                                                                                                                                                                                                                                                                                                                        | Certainty        | Importance |
|------------------------------------------------------------------------|---------------------|--------------|----------------|--------------|------------------------------|----------------------|-----------------------------|---------------------------|------------------------------|--------------------------------------------------------------------------------------------------------------------------------------------------------------------------------------------------------------------------------------------------------------------------------------------------------------------------------------------------------------------------------------------------------|------------------|------------|
| No of studies                                                          | Study design        | Risk of bias | Inconsistency  | Indirectness | Imprecision                  | Other considerations | Unsupervised rehabilitation | Supervised rehabilitation | Relative (95% CI)            | Absolute (95% CI)                                                                                                                                                                                                                                                                                                                                                                                      |                  |            |
| 1<br>Ugutmen<br>2008                                                   | randomised<br>trial | very serious | not assessable | not serious  | serious <sup>a</sup>         | none                 | 49/52 (94.2%)               | 49/52 (94.2%)             | RR 1.00<br>(0.91 to<br>1.10) | 0 fewer per<br>1,000<br>(from 85 fewer to<br>94 more)                                                                                                                                                                                                                                                                                                                                                  | ⊕○○○<br>Very low | CRITICAL   |
| <b>laxity - patients with Pivot shift positive – 31 months post-op</b> |                     |              |                |              |                              |                      |                             |                           |                              |                                                                                                                                                                                                                                                                                                                                                                                                        |                  |            |
| 1<br>Ugutmen<br>2008                                                   | randomised<br>trial | very serious | not assessable | not serious  | very serious <sup>a, d</sup> | none                 | 3/52 (5.8%)                 | 3/52 (5.8%)               | RR 1.00<br>(0.21 to<br>4.73) | 0 fewer per<br>1,000<br>(from 46 fewer to<br>215 more)                                                                                                                                                                                                                                                                                                                                                 | ⊕○○○<br>Very low | CRITICAL   |
| <b>Adverse events</b>                                                  |                     |              |                |              |                              |                      |                             |                           |                              |                                                                                                                                                                                                                                                                                                                                                                                                        |                  |            |
| Beard<br>1998                                                          |                     |              |                |              |                              |                      |                             |                           |                              | One patient in the "home" group had complications (range of motion problems, persistent pain) and required further arthroscopic assessment                                                                                                                                                                                                                                                             |                  | CRITICAL   |
| Schenck<br>1997                                                        |                     |              |                |              |                              |                      |                             |                           |                              | None reported                                                                                                                                                                                                                                                                                                                                                                                          |                  | CRITICAL   |
| Fischer<br>1998                                                        |                     |              |                |              |                              |                      |                             |                           |                              | None reported                                                                                                                                                                                                                                                                                                                                                                                          |                  | CRITICAL   |
| Grant<br>2005                                                          |                     |              |                |              |                              |                      |                             |                           |                              | Two patients in the clinic group had to undergo a manipulation under anesthesia (MUA) and an extension casting procedure within the 12-week study period (1 patient at 8.5 weeks and 1 patient at 10 weeks postoperatively).                                                                                                                                                                           |                  | CRITICAL   |
| Ugutmen<br>2008                                                        |                     |              |                |              |                              |                      |                             |                           |                              | Six patients (5.8%) had knee pain after activity, two (1.9%) had flexion deficiency < 10° without impairing their daily and sporting activities, four (3.8%) had swollen knees, two (1.9%) reported persistent 'giving way' and four (3.8%) had paraesthesia around the surgical wound scar. It is not reported how these patients are distributed between groups                                      |                  | CRITICAL   |
| Revenas<br>2009                                                        |                     |              |                |              |                              |                      |                             |                           |                              | None reported                                                                                                                                                                                                                                                                                                                                                                                          |                  | CRITICAL   |
| Grant<br>2010                                                          |                     |              |                |              |                              |                      |                             |                           |                              | Three patients in the physical therapy group required a subsequent procedure in the operating room. There were 2 patients in the home group who required subsequent arthroscopic debridements with partial meniscal resections. Of note, there were also 2 patients in the physical therapy group who required an early manipulation under anesthesia and long leg cast for knee flexion contractures. |                  | CRITICAL   |
| Hohmann<br>2011                                                        |                     |              |                |              |                              |                      |                             |                           |                              | None reported                                                                                                                                                                                                                                                                                                                                                                                          |                  | CRITICAL   |
| Lim<br>2019                                                            |                     |              |                |              |                              |                      |                             |                           |                              | None reported                                                                                                                                                                                                                                                                                                                                                                                          |                  | CRITICAL   |
| Higgins<br>2020                                                        |                     |              |                |              |                              |                      |                             |                           |                              | None reported                                                                                                                                                                                                                                                                                                                                                                                          |                  | CRITICAL   |

CI: confidence interval; SMD: standardised mean difference; RR: risk ratio

- Total participants <800
- 95% CI of an SMD extends > 0.5 points in either direction
- Not reporting results or SDs
- 95% CI boundaries cross the arbitrary thresholds of 0.75 and 1.25

## Rehabilitation duration: accelerated versus non-accelerated rehabilitation protocol after ACLR

Bibliography: Beynnon 2011, Gupta 2017

| Certainty assessment                                                                                                |              |                  |               |                |             |                              | No of patients             |                                | Effect            |                                                                                                                                                                        | Certainty        | Importance |
|---------------------------------------------------------------------------------------------------------------------|--------------|------------------|---------------|----------------|-------------|------------------------------|----------------------------|--------------------------------|-------------------|------------------------------------------------------------------------------------------------------------------------------------------------------------------------|------------------|------------|
| No of studies                                                                                                       | Study design | Risk of bias     | Inconsistency | Indirectness   | Imprecision | Other considerations         | Accelerated rehabilitation | Non accelerated rehabilitation | Relative (95% CI) | Absolute (95% CI)                                                                                                                                                      |                  |            |
| <b>Laxity</b>                                                                                                       |              |                  |               |                |             |                              |                            |                                |                   |                                                                                                                                                                        |                  |            |
| Laxity - laxity KT-1000 displacement (mm) of the injured limb (better indicated by lower values) – 3 months post-op |              |                  |               |                |             |                              |                            |                                |                   |                                                                                                                                                                        |                  |            |
| 1                                                                                                                   |              |                  |               |                |             |                              |                            |                                |                   |                                                                                                                                                                        |                  |            |
| 1                                                                                                                   | Beynnon 2011 | randomised trial | very serious  | not assessable | not serious | very serious <sup>a, b</sup> | none                       | 21                             | 17                | SMD 0.15 higher<br>(0.49 lower to 0.79 higher)                                                                                                                         | ⊕○○○<br>Very low | CRITICAL   |
|                                                                                                                     | Gupta 2017   | randomised trial | very serious  | not assessable | not serious | very serious <sup>a, c</sup> | none                       | 20                             | 20                | Laxity was measured using clinical grading by Lachman test and Pivot Shift test<br>The authors reported no statistically significant difference between the two groups | ⊕○○○<br>Very low | CRITICAL   |
| Laxity - laxity KT-1000 displacement (mm) of the injured limb (better indicated by lower values) – 6 months post-op |              |                  |               |                |             |                              |                            |                                |                   |                                                                                                                                                                        |                  |            |
| 1                                                                                                                   | Beynnon 2011 | randomised trial | very serious  | not assessable | not serious | very serious <sup>a, b</sup> | none                       | 20                             | 17                | SMD 0.06 higher<br>(0.59 lower to 0.71 higher)                                                                                                                         | ⊕○○○<br>Very low | CRITICAL   |
|                                                                                                                     | Gupta 2017   | randomised trial | very serious  | not assessable | not serious | very serious <sup>a, c</sup> | none                       | 20                             | 20                | Laxity was measured using clinical grading by Lachman test and Pivot Shift test<br>The authors reported no statistically significant difference between the two groups | ⊕○○○<br>Very low | CRITICAL   |
| Laxity - laxity KT-1000 displacement (mm) of the injured limb (better indicated by lower values) – 1 year post-op   |              |                  |               |                |             |                              |                            |                                |                   |                                                                                                                                                                        |                  |            |
| 1                                                                                                                   | Beynnon 2011 | randomised trial | very serious  | not assessable | not serious | very serious <sup>a, b</sup> | none                       | 19                             | 17                | SMD 0.08 higher<br>(0.58 lower to 0.73 higher)                                                                                                                         | ⊕○○○<br>Very low | CRITICAL   |
| Laxity - laxity KT-1000 displacement (mm) of the injured limb (better indicated by lower values) – 2 years post-op  |              |                  |               |                |             |                              |                            |                                |                   |                                                                                                                                                                        |                  |            |
| 1                                                                                                                   | Beynnon 2011 | randomised trial | very serious  | not assessable | not serious | very serious <sup>a, b</sup> | none                       | 19                             | 17                | SMD 0.34 lower<br>(1 lower to 0.32 higher)                                                                                                                             | ⊕○○○<br>Very low | CRITICAL   |
| <b>Patient reported outcomes (PROM)</b>                                                                             |              |                  |               |                |             |                              |                            |                                |                   |                                                                                                                                                                        |                  |            |
| PROM - KOOS pain (better indicated by higher values) – 3 months post-op                                             |              |                  |               |                |             |                              |                            |                                |                   |                                                                                                                                                                        |                  |            |
| 1                                                                                                                   | Beynnon 2011 | randomised trial | very serious  | not assessable | not serious | very serious <sup>a, b</sup> | none                       | 21                             | 17                | SMD 0.52 higher<br>(0.13 lower to 1.17 higher)                                                                                                                         | ⊕○○○<br>Very low | CRITICAL   |
| PROM - KOOS symptoms (better indicated by higher values) – 3 months post-op                                         |              |                  |               |                |             |                              |                            |                                |                   |                                                                                                                                                                        |                  |            |
| 1                                                                                                                   | Beynnon 2011 | randomised trial | very serious  | not assessable | not serious | very serious <sup>a, b</sup> | none                       | 21                             | 17                | SMD 0.45 higher<br>(0.19 lower to 1.1 higher)                                                                                                                          | ⊕○○○<br>Very low | CRITICAL   |
| PROM - KOOS ADL (better indicated by higher values) – 3 months post-op                                              |              |                  |               |                |             |                              |                            |                                |                   |                                                                                                                                                                        |                  |            |
| 1                                                                                                                   | Beynnon 2011 | randomised trial | very serious  | not assessable | not serious | very serious <sup>a, b</sup> | none                       | 21                             | 17                | SMD 0.28 lower<br>(0.92 lower to 0.36 higher)                                                                                                                          | ⊕○○○<br>Very low | CRITICAL   |
| PROM - KOOS sports and recreation (better indicated by higher values) – 3 months post-op                            |              |                  |               |                |             |                              |                            |                                |                   |                                                                                                                                                                        |                  |            |
| 1                                                                                                                   | Beynnon 2011 | randomised trial | very serious  | not assessable | not serious | very serious <sup>a, b</sup> | none                       | 21                             | 17                | SMD 0.31 higher<br>(0.34 lower to 0.95 higher)                                                                                                                         | ⊕○○○<br>Very low | CRITICAL   |
| PROM - KOOS quality of life (better indicated by higher values) – 3 months post-op                                  |              |                  |               |                |             |                              |                            |                                |                   |                                                                                                                                                                        |                  |            |
| 1                                                                                                                   | Beynnon 2011 | randomised trial | very serious  | not assessable | not serious | very serious <sup>a, b</sup> | none                       | 21                             | 17                | SMD 0.3 higher<br>(0.34 lower to 0.94 higher)                                                                                                                          | ⊕○○○<br>Very low | CRITICAL   |
| PROM - KOOS total (better indicated by higher values) – 3 months post-op                                            |              |                  |               |                |             |                              |                            |                                |                   |                                                                                                                                                                        |                  |            |

| Certainty assessment                                                                            |                     |              |                |              |                              |                      | No of patients             |                                | Effect                                          |                   | Certainty        | Importance |
|-------------------------------------------------------------------------------------------------|---------------------|--------------|----------------|--------------|------------------------------|----------------------|----------------------------|--------------------------------|-------------------------------------------------|-------------------|------------------|------------|
| No of studies                                                                                   | Study design        | Risk of bias | Inconsistency  | Indirectness | Imprecision                  | Other considerations | Accelerated rehabilitation | Non accelerated rehabilitation | Relative (95% CI)                               | Absolute (95% CI) |                  |            |
| 1<br>Gupta<br>2017                                                                              | randomised<br>trial | very serious | not assessable | not serious  | very serious <sup>a, b</sup> | none                 | 20                         | 20                             | SMD 0.89 higher<br>(0.23 higher to 1.54 higher) |                   | ⊕○○○<br>Very low | CRITICAL   |
| <b>PROM - KOOS pain (better indicated by higher values) – 6 months post-op</b>                  |                     |              |                |              |                              |                      |                            |                                |                                                 |                   |                  |            |
| 1<br>Beynnon<br>2011                                                                            | randomised<br>trial | very serious | not assessable | not serious  | very serious <sup>a, b</sup> | none                 | 20                         | 17                             | SMD 0.08 higher<br>(0.57 lower to 0.73 higher)  |                   | ⊕○○○<br>Very low | CRITICAL   |
| <b>PROM - KOOS symptoms (better indicated by higher values) – 6 months post-op</b>              |                     |              |                |              |                              |                      |                            |                                |                                                 |                   |                  |            |
| 1<br>Beynnon<br>2011                                                                            | randomised<br>trial | very serious | not assessable | not serious  | very serious <sup>a, b</sup> | none                 | 20                         | 17                             | SMD 0.58 higher<br>(0.09 lower to 1.24 higher)  |                   | ⊕○○○<br>Very low | CRITICAL   |
| <b>PROM - KOOS ADL (better indicated by higher values) – 6 months post-op</b>                   |                     |              |                |              |                              |                      |                            |                                |                                                 |                   |                  |            |
| 1<br>Beynnon<br>2011                                                                            | randomised<br>trial | very serious | not assessable | not serious  | very serious <sup>a, b</sup> | none                 | 20                         | 17                             | SMD 0.09 higher<br>(0.55 lower to 0.74 higher)  |                   | ⊕○○○<br>Very low | CRITICAL   |
| <b>PROM - KOOS sports and recreation (better indicated by higher values) – 6 months post-op</b> |                     |              |                |              |                              |                      |                            |                                |                                                 |                   |                  |            |
| 1<br>Beynnon<br>2011                                                                            | randomised<br>trial | very serious | not assessable | not serious  | very serious <sup>a, b</sup> | none                 | 20                         | 17                             | SMD 0.17 higher<br>(0.47 lower to 0.82 higher)  |                   | ⊕○○○<br>Very low | CRITICAL   |
| <b>PROM - KOOS quality of life (better indicated by higher values) – 6 months post-op</b>       |                     |              |                |              |                              |                      |                            |                                |                                                 |                   |                  |            |
| 1<br>Beynnon<br>2011                                                                            | randomised<br>trial | very serious | not assessable | not serious  | very serious <sup>a, b</sup> | none                 | 20                         | 17                             | SMD 0.17 higher<br>(0.47 lower to 0.82 higher)  |                   | ⊕○○○<br>Very low | CRITICAL   |
| <b>PROM - KOOS total (better indicated by higher values) – 6 months post-op</b>                 |                     |              |                |              |                              |                      |                            |                                |                                                 |                   |                  |            |
| 1<br>Gupta<br>2017                                                                              | randomised<br>trial | very serious | not assessable | not serious  | very serious <sup>a, b</sup> | none                 | 20                         | 20                             | SMD 0.39 higher<br>(0.23 lower to 1.02 higher)  |                   | ⊕○○○<br>Very low | CRITICAL   |
| <b>PROM - KOOS pain (better indicated by higher values) – 1 year post-op</b>                    |                     |              |                |              |                              |                      |                            |                                |                                                 |                   |                  |            |
| 1<br>Beynnon<br>2011                                                                            | randomised<br>trial | very serious | not assessable | not serious  | very serious <sup>a, b</sup> | none                 | 19                         | 17                             | SMD 0.09 higher<br>(0.57 lower to 0.74 higher)  |                   | ⊕○○○<br>Very low | CRITICAL   |
| <b>PROM - KOOS symptoms (better indicated by higher values) – 1 year post-op</b>                |                     |              |                |              |                              |                      |                            |                                |                                                 |                   |                  |            |
| 1<br>Beynnon<br>2011                                                                            | randomised<br>trial | very serious | not assessable | not serious  | very serious <sup>a, b</sup> | none                 | 19                         | 17                             | SMD 0.71 higher<br>(0.03 higher to 1.39 higher) |                   | ⊕○○○<br>Very low | CRITICAL   |
| <b>PROM - KOOS ADL (better indicated by higher values) – 1 year post-op</b>                     |                     |              |                |              |                              |                      |                            |                                |                                                 |                   |                  |            |
| 1<br>Beynnon<br>2011                                                                            | randomised<br>trial | very serious | not assessable | not serious  | very serious <sup>a, b</sup> | none                 | 19                         | 17                             | SMD 0.2 lower<br>(0.85 lower to 0.46 higher)    |                   | ⊕○○○<br>Very low | CRITICAL   |
| <b>PROM - KOOS sports and recreation (better indicated by higher values) – 1 year post-op</b>   |                     |              |                |              |                              |                      |                            |                                |                                                 |                   |                  |            |
| 1<br>Beynnon<br>2011                                                                            | randomised<br>trial | very serious | not assessable | not serious  | very serious <sup>a, b</sup> | none                 | 19                         | 17                             | SMD 0.06 lower<br>(0.71 lower to 0.6 higher)    |                   | ⊕○○○<br>Very low | CRITICAL   |
| <b>PROM - KOOS quality of life (better indicated by higher values) – 1 year post-op</b>         |                     |              |                |              |                              |                      |                            |                                |                                                 |                   |                  |            |
| 1<br>Beynnon<br>2011                                                                            | randomised<br>trial | very serious | not assessable | not serious  | very serious <sup>a, b</sup> | none                 | 19                         | 17                             | SMD 0.33 higher<br>(0.32 lower to 0.99 higher)  |                   | ⊕○○○<br>Very low | CRITICAL   |
| <b>PROM - KOOS pain (better indicated by higher values) – 2 years post-op</b>                   |                     |              |                |              |                              |                      |                            |                                |                                                 |                   |                  |            |
| 1<br>Beynnon<br>2011                                                                            | randomised<br>trial | very serious | not assessable | not serious  | very serious <sup>a, b</sup> | none                 | 19                         | 17                             | SMD 0.2 lower<br>(0.86 lower to 0.45 higher)    |                   | ⊕○○○<br>Very low | CRITICAL   |
| <b>PROM - KOOS symptoms (better indicated by higher values) – 2 years post-op</b>               |                     |              |                |              |                              |                      |                            |                                |                                                 |                   |                  |            |
| 1<br>Beynnon<br>2011                                                                            | randomised<br>trial | very serious | not assessable | not serious  | very serious <sup>a, b</sup> | none                 | 19                         | 17                             | SMD 0.31 higher<br>(0.34 lower to 0.97 higher)  |                   | ⊕○○○<br>Very low | CRITICAL   |
| <b>PROM - KOOS ADL (better indicated by higher values) – 2 years post-op</b>                    |                     |              |                |              |                              |                      |                            |                                |                                                 |                   |                  |            |
| 1<br>Beynnon<br>2011                                                                            | randomised<br>trial | very serious | not assessable | not serious  | very serious <sup>a, b</sup> | none                 | 19                         | 17                             | SMD 0.13 lower<br>(0.78 lower to 0.53 higher)   |                   | ⊕○○○<br>Very low | CRITICAL   |
| <b>PROM - KOOS sports and recreation (better indicated by higher values) – 2 years post-op</b>  |                     |              |                |              |                              |                      |                            |                                |                                                 |                   |                  |            |

| Certainty assessment                                                                                                           |                  |              |                |              |                              |                      | No of patients             |                                | Effect                                                                                                               |                   | Certainty        | Importance |
|--------------------------------------------------------------------------------------------------------------------------------|------------------|--------------|----------------|--------------|------------------------------|----------------------|----------------------------|--------------------------------|----------------------------------------------------------------------------------------------------------------------|-------------------|------------------|------------|
| No of studies                                                                                                                  | Study design     | Risk of bias | Inconsistency  | Indirectness | Imprecision                  | Other considerations | Accelerated rehabilitation | Non accelerated rehabilitation | Relative (95% CI)                                                                                                    | Absolute (95% CI) |                  |            |
| 1<br>Beynnon 2011                                                                                                              | randomised trial | very serious | not assessable | not serious  | very serious <sup>a, b</sup> | none                 | 19                         | 17                             | SMD 0.07 lower<br>(0.73 lower to 0.58 higher)                                                                        |                   | ⊕○○○<br>Very low | CRITICAL   |
| <b>PROM - KOOS quality of life (better indicated by higher values) – 2 years post-op</b>                                       |                  |              |                |              |                              |                      |                            |                                |                                                                                                                      |                   |                  |            |
| 1<br>Beynnon 2011                                                                                                              | randomised trial | very serious | not assessable | not serious  | very serious <sup>a, b</sup> | none                 | 19                         | 17                             | SMD 0.37 higher<br>(0.29 lower to 1.03 higher)                                                                       |                   | ⊕○○○<br>Very low | CRITICAL   |
| <b>Strength</b>                                                                                                                |                  |              |                |              |                              |                      |                            |                                |                                                                                                                      |                   |                  |            |
| 1                                                                                                                              |                  |              |                |              |                              |                      |                            |                                |                                                                                                                      |                   |                  |            |
| <b>Strength - Quadriceps CON 60°/s (better indicated by higher values) – 3 months post-op</b>                                  |                  |              |                |              |                              |                      |                            |                                |                                                                                                                      |                   |                  |            |
| 1<br>Beynnon 2011                                                                                                              | randomised trial | very serious | not assessable | not serious  | very serious <sup>a, b</sup> | none                 | 21                         | 17                             | SMD 0.45 higher<br>(0.19 lower to 1.1 higher)                                                                        |                   | ⊕○○○<br>Very low | CRITICAL   |
| <b>Strength - Quadriceps CON 60°/s (better indicated by higher values) – 6 months post-op</b>                                  |                  |              |                |              |                              |                      |                            |                                |                                                                                                                      |                   |                  |            |
| 1<br>Beynnon 2011                                                                                                              | randomised trial | very serious | not assessable | not serious  | very serious <sup>a, b</sup> | none                 | 20                         | 17                             | SMD 0.41 higher<br>(0.25 lower to 1.06 higher)                                                                       |                   | ⊕○○○<br>Very low | CRITICAL   |
| <b>Strength - Quadriceps CON 60°/s (better indicated by higher values) – 1 year post-op</b>                                    |                  |              |                |              |                              |                      |                            |                                |                                                                                                                      |                   |                  |            |
| 1<br>Beynnon 2011                                                                                                              | randomised trial | very serious | not assessable | not serious  | very serious <sup>a, b</sup> | none                 | 19                         | 17                             | SMD 0.31 higher<br>(0.35 lower to 0.97 higher)                                                                       |                   | ⊕○○○<br>Very low | CRITICAL   |
| <b>Strength - Quadriceps CON 60°/s (better indicated by higher values) – 2 years post-op</b>                                   |                  |              |                |              |                              |                      |                            |                                |                                                                                                                      |                   |                  |            |
| 1<br>Beynnon 2011                                                                                                              | randomised trial | very serious | not assessable | not serious  | very serious <sup>a, b</sup> | none                 | 19                         | 17                             | SMD 0.54 higher<br>(0.13 lower to 1.21 higher)                                                                       |                   | ⊕○○○<br>Very low | CRITICAL   |
| <b>Functional activities</b>                                                                                                   |                  |              |                |              |                              |                      |                            |                                |                                                                                                                      |                   |                  |            |
| 2                                                                                                                              |                  |              |                |              |                              |                      |                            |                                |                                                                                                                      |                   |                  |            |
| <b>Functional - single leg hop for distance difference between limbs (better indicated by lower values) – 3 months post-op</b> |                  |              |                |              |                              |                      |                            |                                |                                                                                                                      |                   |                  |            |
| 1<br>Beynnon 2011                                                                                                              | randomised trial | very serious | not assessable | not serious  | very serious <sup>a, b</sup> | none                 | 21                         | 17                             | SMD 0.15 lower<br>(0.79 lower to 0.49 higher)                                                                        |                   | ⊕○○○<br>Very low | IMPORTANT  |
| <b>Functional - single leg hop for distance difference between limbs (better indicated by lower values) – 6 months post-op</b> |                  |              |                |              |                              |                      |                            |                                |                                                                                                                      |                   |                  |            |
| 1<br>Beynnon 2011                                                                                                              | randomised trial | very serious | not assessable | not serious  | very serious <sup>a, b</sup> | none                 | 20                         | 17                             | SMD 0.49 lower<br>(1.15 lower to 0.17 higher)                                                                        |                   | ⊕○○○<br>Very low | IMPORTANT  |
| Gupta 2017                                                                                                                     | randomised trial | very serious | not assessable | not serious  | very serious <sup>a, c</sup> | none                 | 20                         | 20                             | SDs are not reported. The authors reported no statistically significant difference between the two groups (p=0.254). |                   | ⊕○○○<br>Very low | IMPORTANT  |
| <b>Functional - single leg hop for distance difference between limbs (better indicated by lower values) – 1 year post-op</b>   |                  |              |                |              |                              |                      |                            |                                |                                                                                                                      |                   |                  |            |
| 1<br>Beynnon 2011                                                                                                              | randomised trial | very serious | not assessable | not serious  | very serious <sup>a, b</sup> | none                 | 19                         | 17                             | SMD 0.37 higher<br>(0.29 lower to 1.03 higher)                                                                       |                   | ⊕○○○<br>Very low | IMPORTANT  |
| <b>Functional - single leg hop for distance difference between limbs (better indicated by lower values) – 2 years post-op</b>  |                  |              |                |              |                              |                      |                            |                                |                                                                                                                      |                   |                  |            |
| 1<br>Beynnon 2011                                                                                                              | randomised trial | very serious | not assessable | not serious  | very serious <sup>a, b</sup> | none                 | 19                         | 17                             | SMD 0.34 lower<br>(1 lower to 0.32 higher)                                                                           |                   | ⊕○○○<br>Very low | IMPORTANT  |
| <b>Proprioception</b>                                                                                                          |                  |              |                |              |                              |                      |                            |                                |                                                                                                                      |                   |                  |            |
| 1                                                                                                                              |                  |              |                |              |                              |                      |                            |                                |                                                                                                                      |                   |                  |            |
| <b>Proprioception - detection of passive knee motion (better indicated by lower values) – 3 months post-op</b>                 |                  |              |                |              |                              |                      |                            |                                |                                                                                                                      |                   |                  |            |
| 1<br>Beynnon 2011                                                                                                              | randomised trial | very serious | not assessable | not serious  | very serious <sup>a, b</sup> | none                 | 21                         | 17                             | SMD 0.1 higher<br>(0.54 lower to 0.74 higher)                                                                        |                   | ⊕○○○<br>Very low | IMPORTANT  |
| <b>Proprioception - detection of passive knee motion (better indicated by lower values) – 6 months post-op</b>                 |                  |              |                |              |                              |                      |                            |                                |                                                                                                                      |                   |                  |            |
| 1<br>Beynnon 2011                                                                                                              | randomised trial | very serious | not assessable | not serious  | very serious <sup>a, b</sup> | none                 | 20                         | 17                             | SMD 0.77 lower<br>(1.44 lower to 0.09 lower)                                                                         |                   | ⊕○○○<br>Very low | IMPORTANT  |

| Certainty assessment                                                                                          |                     |              |                |              |                              |                      | No of patients             |                                | Effect                                                                                                                                                                                                   |                   | Certainty        | Importance |
|---------------------------------------------------------------------------------------------------------------|---------------------|--------------|----------------|--------------|------------------------------|----------------------|----------------------------|--------------------------------|----------------------------------------------------------------------------------------------------------------------------------------------------------------------------------------------------------|-------------------|------------------|------------|
| No of studies                                                                                                 | Study design        | Risk of bias | Inconsistency  | Indirectness | Imprecision                  | Other considerations | Accelerated rehabilitation | Non accelerated rehabilitation | Relative (95% CI)                                                                                                                                                                                        | Absolute (95% CI) |                  |            |
| <b>Proprioception - detection of passive knee motion (better indicated by lower values) – 1 year post-op</b>  |                     |              |                |              |                              |                      |                            |                                |                                                                                                                                                                                                          |                   |                  |            |
| 1<br>Beynnon<br>2011                                                                                          | randomised<br>trial | very serious | not assessable | not serious  | very serious <sup>a, b</sup> | none                 | 19                         | 17                             | SMD 0.12 lower<br>(0.78 lower to 0.53 higher)                                                                                                                                                            |                   | ⊕○○○<br>Very low | IMPORTANT  |
| <b>Proprioception - detection of passive knee motion (better indicated by lower values) – 2 years post-op</b> |                     |              |                |              |                              |                      |                            |                                |                                                                                                                                                                                                          |                   |                  |            |
| 1<br>Beynnon<br>2011                                                                                          | randomised<br>trial | very serious | not assessable | not serious  | very serious <sup>a, b</sup> | none                 | 19                         | 17                             | SMD 0.25 higher<br>(0.41 lower to 0.9 higher)                                                                                                                                                            |                   | ⊕○○○<br>Very low | IMPORTANT  |
| <b>Adverse events</b>                                                                                         |                     |              |                |              |                              |                      |                            |                                |                                                                                                                                                                                                          |                   |                  |            |
| Beynnon<br>2011                                                                                               |                     |              |                |              |                              |                      |                            |                                | One participant in the nonaccelerated group suffered a re-ear of their graft detected at the 6-month follow-up and this was produced during the same sport (cheerleading) that produced the index injury |                   |                  | CRITICAL   |
| Gupta<br>2017                                                                                                 |                     |              |                |              |                              |                      |                            |                                | None reported                                                                                                                                                                                            |                   |                  | CRITICAL   |

CI: confidence interval; SMD: standardised mean difference

- a. Total participants <800  
b. 95% CI of an SMD extends > 0.5 points in either direction  
c. Not reporting results or SDs

## Continuous passive motion (CPM) versus no CPM in rehabilitation after ACLR

Bibliography: Yates 1992, Anderson 1989, McCarthy 1993a, McCarthy 1993b

| Certainty assessment                                    |               |                  |               |                |                      |                             | No of patients |        | Effect            |                                                                                      | Certainty        | Importance |
|---------------------------------------------------------|---------------|------------------|---------------|----------------|----------------------|-----------------------------|----------------|--------|-------------------|--------------------------------------------------------------------------------------|------------------|------------|
| No of studies                                           | Study design  | Risk of bias     | Inconsistency | Indirectness   | Imprecision          | Other considerations        | CPM            | no CPM | Relative (95% CI) | Absolute (95% CI)                                                                    |                  |            |
| <b>Range of motion (ROM)</b>                            |               |                  |               |                |                      |                             |                |        |                   |                                                                                      |                  |            |
| 2                                                       |               |                  |               |                |                      |                             |                |        |                   |                                                                                      |                  |            |
| <b>ROM - flexion – 3 days post-op</b>                   |               |                  |               |                |                      |                             |                |        |                   |                                                                                      |                  |            |
| 1                                                       | Yates 1992    | randomised trial | very serious  | not assessable | not serious          | very serious <sup>a,c</sup> | none           | 15     | 15                | The authors reported more flexion in the CPM group                                   | ⊕○○○<br>Very low | CRITICAL   |
| <b>ROM - flexion – 1 week post-op</b>                   |               |                  |               |                |                      |                             |                |        |                   |                                                                                      |                  |            |
| 1                                                       | Yates 1992    | randomised trial | very serious  | not assessable | not serious          | very serious <sup>a,c</sup> | none           | 15     | 15                | The authors reported more flexion in the CPM group                                   | ⊕○○○<br>Very low | CRITICAL   |
| <b>ROM - flexion – 3 weeks post-op</b>                  |               |                  |               |                |                      |                             |                |        |                   |                                                                                      |                  |            |
| 1                                                       | Yates 1992    | randomised trial | very serious  | not assessable | not serious          | very serious <sup>a,c</sup> | none           | 15     | 15                | More flexion in CPM group only before physiotherapy but not after                    | ⊕○○○<br>Very low | CRITICAL   |
| <b>ROM - flexion – 6 months post-op</b>                 |               |                  |               |                |                      |                             |                |        |                   |                                                                                      |                  |            |
| 1                                                       | Anderson 1989 | randomised trial | very serious  | not assessable | serious <sup>d</sup> | very serious <sup>a,c</sup> | none           | 19     | 20                | The authors reported no statistically significant difference between the two groups. | ⊕○○○<br>Very low | CRITICAL   |
| <b>ROM - extension – 3 days post-op</b>                 |               |                  |               |                |                      |                             |                |        |                   |                                                                                      |                  |            |
| 1                                                       | Yates 1992    | randomised trial | very serious  | not assessable | not serious          | very serious <sup>a,c</sup> | none           | 15     | 15                | The authors reported no statistically significant difference between the two groups. | ⊕○○○<br>Very low | CRITICAL   |
| <b>ROM - extension – 7 days post-op</b>                 |               |                  |               |                |                      |                             |                |        |                   |                                                                                      |                  |            |
| 1                                                       | Yates 1992    | randomised trial | very serious  | not assessable | not serious          | very serious <sup>a,c</sup> | none           | 15     | 15                | The authors reported no statistically significant difference between the two groups. | ⊕○○○<br>Very low | CRITICAL   |
| <b>ROM - extension – 3 weeks post-op</b>                |               |                  |               |                |                      |                             |                |        |                   |                                                                                      |                  |            |
| 1                                                       | Yates 1992    | randomised trial | very serious  | not assessable | not serious          | very serious <sup>a,c</sup> | none           | 15     | 15                | The authors reported no statistically significant difference between the two groups. | ⊕○○○<br>Very low | CRITICAL   |
| <b>ROM - extension – 6 months post-op</b>               |               |                  |               |                |                      |                             |                |        |                   |                                                                                      |                  |            |
| 1                                                       | Anderson 1989 | randomised trial | very serious  | not assessable | serious <sup>d</sup> | very serious <sup>a,c</sup> | none           | 19     | 20                | The authors reported no statistically significant difference between the two groups. | ⊕○○○<br>Very low | CRITICAL   |
| <b>Swelling</b>                                         |               |                  |               |                |                      |                             |                |        |                   |                                                                                      |                  |            |
| 2                                                       |               |                  |               |                |                      |                             |                |        |                   |                                                                                      |                  |            |
| <b>Swelling - swelling mid-patella – 1 day post-op</b>  |               |                  |               |                |                      |                             |                |        |                   |                                                                                      |                  |            |
| 1                                                       | Yates 1992    | randomised trial | very serious  | not assessable | not serious          | very serious <sup>a,c</sup> | none           | 15     | 15                | The authors reported less swelling in the CPM group.                                 | ⊕○○○<br>Very low | CRITICAL   |
| <b>Swelling - swelling mid-patella – 2 days post-op</b> |               |                  |               |                |                      |                             |                |        |                   |                                                                                      |                  |            |
| 1                                                       | Yates 1992    | randomised trial | very serious  | not assessable | not serious          | very serious <sup>a,c</sup> | none           | 15     | 15                | The authors reported less swelling in the CPM group.                                 | ⊕○○○<br>Very low | CRITICAL   |
| <b>Swelling - swelling mid-patella – 3 days post-op</b> |               |                  |               |                |                      |                             |                |        |                   |                                                                                      |                  |            |
| 1                                                       | Yates 1992    | randomised trial | very serious  | not assessable | not serious          | very serious <sup>a,c</sup> | none           | 15     | 15                | The authors reported less swelling in the CPM group.                                 | ⊕○○○<br>Very low | CRITICAL   |
| <b>Swelling - swelling – 6 weeks post-op</b>            |               |                  |               |                |                      |                             |                |        |                   |                                                                                      |                  |            |
| 1                                                       | Anderson 1989 | randomised trial | very serious  | not assessable | serious <sup>d</sup> | very serious <sup>a,c</sup> | none           | 19     | 20                | The authors reported no statistically significant difference between the two groups. | ⊕○○○<br>Very low | CRITICAL   |
| <b>Effusion</b>                                         |               |                  |               |                |                      |                             |                |        |                   |                                                                                      |                  |            |
| 1                                                       |               |                  |               |                |                      |                             |                |        |                   |                                                                                      |                  |            |
| <b>Effusion - effusion sweep test – 3 days post-op</b>  |               |                  |               |                |                      |                             |                |        |                   |                                                                                      |                  |            |

47

Aspetar clinical practice guideline on rehabilitation after ACLR: Supplementary file

| Certainty assessment                                                                                                      |                  |              |                |              |                             |                      | No of patients |        | Effect                                                                               |                   | Certainty        | Importance |
|---------------------------------------------------------------------------------------------------------------------------|------------------|--------------|----------------|--------------|-----------------------------|----------------------|----------------|--------|--------------------------------------------------------------------------------------|-------------------|------------------|------------|
| No of studies                                                                                                             | Study design     | Risk of bias | Inconsistency  | Indirectness | Imprecision                 | Other considerations | CPM            | no CPM | Relative (95% CI)                                                                    | Absolute (95% CI) |                  |            |
| 1<br>Yates 1992                                                                                                           | randomised trial | very serious | not assessable | not serious  | very serious <sup>a,c</sup> | none                 | 15             | 15     | The authors reported that CPM had a significant reduction in hemarthrosis            |                   | ⊕○○○<br>Very low | CRITICAL   |
| <b>Effusion - effusion sweep test – 7 days post-op</b>                                                                    |                  |              |                |              |                             |                      |                |        |                                                                                      |                   |                  |            |
| 1<br>Yates 1992                                                                                                           | randomised trial | very serious | not assessable | not serious  | very serious <sup>a,c</sup> | none                 | 15             | 15     | The authors reported no statistically significant difference between the two groups. |                   | ⊕○○○<br>Very low | CRITICAL   |
| <b>Effusion - effusion sweep test – 3 weeks post-op</b>                                                                   |                  |              |                |              |                             |                      |                |        |                                                                                      |                   |                  |            |
| 1<br>Yates 1992                                                                                                           | randomised trial | very serious | not assessable | not serious  | very serious <sup>a,c</sup> | none                 | 15             | 15     | The authors reported no statistically significant difference between the two groups. |                   | ⊕○○○<br>Very low | CRITICAL   |
| <b>Pain</b>                                                                                                               |                  |              |                |              |                             |                      |                |        |                                                                                      |                   |                  |            |
| 2                                                                                                                         |                  |              |                |              |                             |                      |                |        |                                                                                      |                   |                  |            |
| <b>Medication (morphine) via analgetic pump (better indicated by lower values) – 1 day post-op</b>                        |                  |              |                |              |                             |                      |                |        |                                                                                      |                   |                  |            |
| 1<br>McCarthy 1993b                                                                                                       | randomised trial | very serious | not assessable | not serious  | very serious <sup>a,b</sup> | none                 | 15             | 15     | SMD <b>1.16 lower</b><br>(1.94 lower to 0.38 lower)                                  |                   | ⊕○○○<br>Very low | CRITICAL   |
| 1<br>Yates 1992                                                                                                           | randomised trial | very serious | not assessable | not serious  | very serious <sup>a,c</sup> | none                 | 15             | 15     | The authors reported less pain medication consumption in the CPM group               |                   | ⊕○○○<br>Very low | CRITICAL   |
| <b>Pain - number of times patient pushed the analgetic pump (better indicated by lower values) – 1 day post-op</b>        |                  |              |                |              |                             |                      |                |        |                                                                                      |                   |                  |            |
| 1<br>McCarthy 1993b                                                                                                       | randomised trial | very serious | not assessable | not serious  | very serious <sup>a,b</sup> | none                 | 15             | 15     | SMD <b>0.82 lower</b><br>(1.57 lower to 0.07 lower)                                  |                   | ⊕○○○<br>Very low | CRITICAL   |
| Yates 1992                                                                                                                | randomised trial | very serious | not assessable | not serious  | very serious <sup>a,c</sup> | none                 | 15             | 15     | Patients in the CPM group pushed the button half the times than the non-CPM group    |                   | ⊕○○○<br>Very low | CRITICAL   |
| <b>Pain - pain oral medication (better indicated by lower values) – 2-3 days post-op</b>                                  |                  |              |                |              |                             |                      |                |        |                                                                                      |                   |                  |            |
| 1<br>McCarthy 1993b                                                                                                       | randomised trial | very serious | not assessable | not serious  | very serious <sup>a,b</sup> | none                 | 15             | 15     | SMD <b>0.74 lower</b><br>(1.49 lower to 0)                                           |                   | ⊕○○○<br>Very low | CRITICAL   |
| 1<br>Yates 1992                                                                                                           | randomised trial | very serious | not assessable | not serious  | very serious <sup>a,c</sup> | none                 | 15             | 15     | The authors reported less oral medication consumption in the CPM group               |                   | ⊕○○○<br>Very low | CRITICAL   |
| <b>Pain - perceived pain score - question 1 – constant pain level (better indicated by lower values) – 3 days post-op</b> |                  |              |                |              |                             |                      |                |        |                                                                                      |                   |                  |            |
| 1<br>McCarthy 1993b                                                                                                       | randomised trial | very serious | not assessable | not serious  | very serious <sup>a,b</sup> | none                 | 15             | 15     | SMD <b>0.21 lower</b><br>(0.93 lower to 0.51 higher)                                 |                   | ⊕○○○<br>Very low | CRITICAL   |
| <b>Pain - perceived pain score - question 2 – worst level (better indicated by lower values) – 3 days post-op</b>         |                  |              |                |              |                             |                      |                |        |                                                                                      |                   |                  |            |
| 1<br>McCarthy 1993b                                                                                                       | randomised trial | very serious | not assessable | not serious  | very serious <sup>a,b</sup> | none                 | 15             | 15     | SMD <b>0.64 lower</b><br>(1.37 lower to 0.1 higher)                                  |                   | ⊕○○○<br>Very low | CRITICAL   |
| <b>Pain - perceived pain score - question 3 – least level (better indicated by lower values) – 3 days post-op</b>         |                  |              |                |              |                             |                      |                |        |                                                                                      |                   |                  |            |
| 1<br>McCarthy 1993b                                                                                                       | randomised trial | very serious | not assessable | not serious  | very serious <sup>a,b</sup> | none                 | 15             | 15     | SMD <b>0.14 higher</b><br>(0.58 lower to 0.85 higher)                                |                   | ⊕○○○<br>Very low | CRITICAL   |
| <b>Pain - perceived pain score – 1 day post-op</b>                                                                        |                  |              |                |              |                             |                      |                |        |                                                                                      |                   |                  |            |
| Yates 1992                                                                                                                | randomised trial | very serious | not assessable | not serious  | very serious <sup>a,c</sup> | none                 | 15             | 15     | The authors reported no statistically significant difference between the two groups. |                   | ⊕○○○<br>Very low | CRITICAL   |
| <b>Pain - perceived pain score – 2 days post-op</b>                                                                       |                  |              |                |              |                             |                      |                |        |                                                                                      |                   |                  |            |
| Yates 1992                                                                                                                | randomised trial | very serious | not assessable | not serious  | very serious <sup>a,c</sup> | none                 | 15             | 15     | The authors reported no statistically significant difference between the two groups. |                   | ⊕○○○<br>Very low | CRITICAL   |
| <b>Pain - perceived pain score – 3 days post-op</b>                                                                       |                  |              |                |              |                             |                      |                |        |                                                                                      |                   |                  |            |
| Yates 1992                                                                                                                | randomised trial | very serious | not assessable | not serious  | very serious <sup>a,c</sup> | none                 | 15             | 15     | The authors reported no statistically significant difference between the two groups. |                   | ⊕○○○<br>Very low | CRITICAL   |
| <b>Laxity</b>                                                                                                             |                  |              |                |              |                             |                      |                |        |                                                                                      |                   |                  |            |
| 2                                                                                                                         |                  |              |                |              |                             |                      |                |        |                                                                                      |                   |                  |            |

| Certainty assessment                                                                 |                  |              |                |                      |                              |                      | No of patients |        | Effect                                                                                                                                                                                                                            |                   | Certainty        | Importance |
|--------------------------------------------------------------------------------------|------------------|--------------|----------------|----------------------|------------------------------|----------------------|----------------|--------|-----------------------------------------------------------------------------------------------------------------------------------------------------------------------------------------------------------------------------------|-------------------|------------------|------------|
| No of studies                                                                        | Study design     | Risk of bias | Inconsistency  | Indirectness         | Imprecision                  | Other considerations | CPM            | no CPM | Relative (95% CI)                                                                                                                                                                                                                 | Absolute (95% CI) |                  |            |
| <b>Laxity - laxity (better indicated by lower values) – 1 year post-op</b>           |                  |              |                |                      |                              |                      |                |        |                                                                                                                                                                                                                                   |                   |                  |            |
| 1<br>McCarthy 1993a                                                                  | randomised trial | very serious | not assessable | not serious          | very serious <sup>a, b</sup> | none                 | 10             | 10     | SMD 0<br>(0.88 lower to 0.88 higher)                                                                                                                                                                                              |                   | ⊕○○○<br>Very low | CRITICAL   |
| Anderson 1989                                                                        | randomised trial | very serious | not assessable | serious <sup>d</sup> | very serious <sup>a, c</sup> | none                 | 19             | 20     | The authors reported no statistically significant difference between the two groups.                                                                                                                                              |                   | ⊕○○○<br>Very low | CRITICAL   |
| <b>Laxity - pivot shift test (better indicated by lower values) – 1 year post-op</b> |                  |              |                |                      |                              |                      |                |        |                                                                                                                                                                                                                                   |                   |                  |            |
| 1<br>McCarthy 1993a                                                                  | randomised trial | very serious | not assessable | not serious          | very serious <sup>a, b</sup> | none                 | 10             | 10     | SMD 0.38 lower<br>(1.27 lower to 0.5 higher)                                                                                                                                                                                      |                   | ⊕○○○<br>Very low | CRITICAL   |
| <b>Atrophy</b>                                                                       |                  |              |                |                      |                              |                      |                |        |                                                                                                                                                                                                                                   |                   |                  |            |
| 2                                                                                    |                  |              |                |                      |                              |                      |                |        |                                                                                                                                                                                                                                   |                   |                  |            |
| <b>Atrophy - 10cm above patella – 1 day post-op</b>                                  |                  |              |                |                      |                              |                      |                |        |                                                                                                                                                                                                                                   |                   |                  |            |
| 1<br>Yates 1992                                                                      | randomised trial | very serious | not assessable | not serious          | very serious <sup>a, c</sup> | none                 | 15             | 15     | The authors reported less atrophy in the non-CPM group.                                                                                                                                                                           |                   | ⊕○○○<br>Very low | IMPORTANT  |
| <b>Atrophy - 10cm above patella – 2 days post-op</b>                                 |                  |              |                |                      |                              |                      |                |        |                                                                                                                                                                                                                                   |                   |                  |            |
| 1<br>Yates 1992                                                                      | randomised trial | very serious | not assessable | not serious          | very serious <sup>a, c</sup> | none                 | 15             | 15     | The authors reported less atrophy in the non-CPM group.                                                                                                                                                                           |                   | ⊕○○○<br>Very low | IMPORTANT  |
| <b>Atrophy - 10cm above patella – 3 days post-op</b>                                 |                  |              |                |                      |                              |                      |                |        |                                                                                                                                                                                                                                   |                   |                  |            |
| 1<br>Yates 1992                                                                      | randomised trial | very serious | not assessable | not serious          | very serious <sup>a, c</sup> | none                 | 15             | 15     | The authors reported less atrophy in the non-CPM group.                                                                                                                                                                           |                   | ⊕○○○<br>Very low | IMPORTANT  |
| <b>Atrophy - 15cm above patella – 6 weeks post-op</b>                                |                  |              |                |                      |                              |                      |                |        |                                                                                                                                                                                                                                   |                   |                  |            |
| Anderson 1989                                                                        | randomised trial | very serious | not assessable | serious              | very serious <sup>a, c</sup> | none                 | 19             | 20     | The authors reported no statistically significant difference between the two groups.                                                                                                                                              |                   | ⊕○○○<br>Very low | IMPORTANT  |
| <b>Strength</b>                                                                      |                  |              |                |                      |                              |                      |                |        |                                                                                                                                                                                                                                   |                   |                  |            |
| 1                                                                                    |                  |              |                |                      |                              |                      |                |        |                                                                                                                                                                                                                                   |                   |                  |            |
| <b>Strength - Quadriceps strength– 1 year post-op</b>                                |                  |              |                |                      |                              |                      |                |        |                                                                                                                                                                                                                                   |                   |                  |            |
| Anderson 1989                                                                        | randomised trial | very serious | not assessable | serious <sup>d</sup> | very serious <sup>a, c</sup> | none                 | 19             | 20     | The authors reported no statistically significant difference between the two groups.                                                                                                                                              |                   | ⊕○○○<br>Very low | IMPORTANT  |
| <b>Strength - Hamstring strength– 1 year post-op</b>                                 |                  |              |                |                      |                              |                      |                |        |                                                                                                                                                                                                                                   |                   |                  |            |
| Anderson 1989                                                                        | randomised trial | very serious | not assessable | serious <sup>d</sup> | very serious <sup>a, c</sup> | none                 | 19             | 20     | The authors reported no statistically significant difference between the two groups.                                                                                                                                              |                   | ⊕○○○<br>Very low | IMPORTANT  |
| <b>Adverse events</b>                                                                |                  |              |                |                      |                              |                      |                |        |                                                                                                                                                                                                                                   |                   |                  |            |
| Yates 1992                                                                           |                  |              |                |                      |                              |                      |                |        | "The only complication occurred in a patient who had a temporary sensory palsy, which was thought to be related to tourniquet pressure and which resolved itself within 3 months". It was not specified the group of this patient |                   |                  | CRITICAL   |
| McCarthy 1993b                                                                       |                  |              |                |                      |                              |                      |                |        | None reported                                                                                                                                                                                                                     |                   |                  | CRITICAL   |
| McCarthy 1993a                                                                       |                  |              |                |                      |                              |                      |                |        | None reported                                                                                                                                                                                                                     |                   |                  | CRITICAL   |
| Anderson 1989                                                                        |                  |              |                |                      |                              |                      |                |        | Manipulation in the immobilised group (non-CPM)                                                                                                                                                                                   |                   |                  | CRITICAL   |

CI: confidence interval; SMD: standardised mean difference

- a. Total participants <800
- b. 95% CI of an SMD extends > 0.5 points in either direction
- c. Not reporting results or SDs
- d. Conclusions based on indirect comparisons

## Continuous passive motion (CPM) versus active motion in rehabilitation after ACLR

Bibliography: Friemert 2006, Rosen 1992, Engstrom 1995

| Certainty assessment                                                        |                  |              |                |              |                              |                      | No of patients |               | Effect                                                                                                     |                   | Certainty | Importance |
|-----------------------------------------------------------------------------|------------------|--------------|----------------|--------------|------------------------------|----------------------|----------------|---------------|------------------------------------------------------------------------------------------------------------|-------------------|-----------|------------|
| No of studies                                                               | Study design     | Risk of bias | Inconsistency  | Indirectness | Imprecision                  | Other considerations | CPM            | Active motion | Relative (95% CI)                                                                                          | Absolute (95% CI) |           |            |
| <b>Range of motion (ROM)</b>                                                |                  |              |                |              |                              |                      |                |               |                                                                                                            |                   |           |            |
| 3                                                                           |                  |              |                |              |                              |                      |                |               |                                                                                                            |                   |           |            |
| <b>ROM - flexion (better indicated by higher values) – 1 week post-op</b>   |                  |              |                |              |                              |                      |                |               |                                                                                                            |                   |           |            |
| Friemert 2006                                                               | randomised trial | very serious | not assessable | not serious  | very serious <sup>a, b</sup> | none                 | 30             | 30            | SMD 0.38 lower (0.89 lower to 0.13 higher)                                                                 | ⊕○○○<br>Very low  |           | CRITICAL   |
| Rosen 1992                                                                  | randomised trial | very serious | not assessable | not serious  | very serious <sup>a, c</sup> | none                 | 25             | 25            | SDs are not reported. The authors reported no statistically significant difference between the two groups. | ⊕○○○<br>Very low  |           | CRITICAL   |
| <b>ROM - flexion – 4 weeks post-op</b>                                      |                  |              |                |              |                              |                      |                |               |                                                                                                            |                   |           |            |
| Rosen 1992                                                                  | randomised trial | very serious | not assessable | not serious  | very serious <sup>a, c</sup> | none                 | 25             | 25            | SDs are not reported. The authors reported no statistically significant difference between the two groups. | ⊕○○○<br>Very low  |           | CRITICAL   |
| <b>ROM - flexion (better indicated by higher values) – 6 weeks post-op</b>  |                  |              |                |              |                              |                      |                |               |                                                                                                            |                   |           |            |
| 1 Engstrom 1995                                                             | randomised trial | very serious | not assessable | not serious  | very serious <sup>a, b</sup> | none                 | 17             | 17            | SMD 0.24 lower (0.92 lower to 0.43 higher)                                                                 | ⊕○○○<br>Very low  |           | CRITICAL   |
| <b>ROM - flexion – 2 months post-op</b>                                     |                  |              |                |              |                              |                      |                |               |                                                                                                            |                   |           |            |
| 1 Rosen 1992                                                                | randomised trial | very serious | not assessable | not serious  | very serious <sup>a, c</sup> | none                 | 25             | 25            | SDs are not reported. The authors reported no statistically significant difference between the two groups. | ⊕○○○<br>Very low  |           | CRITICAL   |
| <b>ROM - flexion – 6 months post-op</b>                                     |                  |              |                |              |                              |                      |                |               |                                                                                                            |                   |           |            |
| 1 Rosen 1992                                                                | randomised trial | very serious | not assessable | not serious  | very serious <sup>a, c</sup> | none                 | 25             | 25            | SDs are not reported. The authors reported no statistically significant difference between the two groups. | ⊕○○○<br>Very low  |           | CRITICAL   |
| <b>ROM - extension – 7 days post-op</b>                                     |                  |              |                |              |                              |                      |                |               |                                                                                                            |                   |           |            |
| 1 Rosen 1992                                                                | randomised trial | very serious | not assessable | not serious  | very serious <sup>a, c</sup> | none                 | 25             | 25            | SDs are not reported. The authors reported no statistically significant difference between the two groups. | ⊕○○○<br>Very low  |           | CRITICAL   |
| <b>ROM - extension – 4 weeks post-op</b>                                    |                  |              |                |              |                              |                      |                |               |                                                                                                            |                   |           |            |
| 1 Rosen 1992                                                                | randomised trial | very serious | not assessable | not serious  | very serious <sup>a, c</sup> | none                 | 25             | 25            | SDs are not reported. The authors reported no statistically significant difference between the two groups. | ⊕○○○<br>Very low  |           | CRITICAL   |
| <b>ROM - extension (better indicated by lower values) – 6 weeks post-op</b> |                  |              |                |              |                              |                      |                |               |                                                                                                            |                   |           |            |
| 1 Engstrom 1995                                                             | randomised trial | very serious | not assessable | not serious  | very serious <sup>a, b</sup> | none                 | 17             | 17            | SMD 0.14 lower (0.82 lower to 0.53 higher)                                                                 | ⊕○○○<br>Very low  |           | CRITICAL   |
| <b>ROM - extension – 2 months post-op</b>                                   |                  |              |                |              |                              |                      |                |               |                                                                                                            |                   |           |            |
| 1 Rosen 1992                                                                | randomised trial | very serious | not assessable | not serious  | very serious <sup>a, c</sup> | none                 | 25             | 25            | SDs are not reported. The authors reported no statistically significant difference between the two groups. | ⊕○○○<br>Very low  |           | CRITICAL   |
| <b>ROM - extension – 6 months post-op</b>                                   |                  |              |                |              |                              |                      |                |               |                                                                                                            |                   |           |            |
| 1 Rosen 1992                                                                | randomised trial | very serious | not assessable | not serious  | very serious <sup>a, c</sup> | none                 | 25             | 25            | SDs are not reported. The authors reported no statistically significant difference between the two groups. | ⊕○○○<br>Very low  |           | CRITICAL   |
| <b>Swelling</b>                                                             |                  |              |                |              |                              |                      |                |               |                                                                                                            |                   |           |            |
| 2                                                                           |                  |              |                |              |                              |                      |                |               |                                                                                                            |                   |           |            |
| <b>Swelling - swelling ultrasonography – 7 days post-op</b>                 |                  |              |                |              |                              |                      |                |               |                                                                                                            |                   |           |            |

| Certainty assessment                                                                      |               |                  |               |                |             |                             | No of patients |               | Effect            |                                                                                      | Certainty                                        | Importance       |           |
|-------------------------------------------------------------------------------------------|---------------|------------------|---------------|----------------|-------------|-----------------------------|----------------|---------------|-------------------|--------------------------------------------------------------------------------------|--------------------------------------------------|------------------|-----------|
| No of studies                                                                             | Study design  | Risk of bias     | Inconsistency | Indirectness   | Imprecision | Other considerations        | CPM            | Active motion | Relative (95% CI) | Absolute (95% CI)                                                                    |                                                  |                  |           |
| 1                                                                                         | Friemert 2006 | randomised trial | very serious  | not assessable | not serious | very serious <sup>a,c</sup> | none           | 30            | 30                | The authors reported no statistically significant difference between the two groups. |                                                  | ⊕○○○<br>Very low | CRITICAL  |
| <b>Swelling - swelling (better indicated by lower values) – 6 weeks post-op</b>           |               |                  |               |                |             |                             |                |               |                   |                                                                                      |                                                  |                  |           |
| 1                                                                                         | Engstrom 1995 | randomised trial | very serious  | not assessable | not serious | very serious <sup>a,b</sup> | none           | 17            | 17                | SMD 0.71 lower (1.41 lower to 0.01 lower)                                            |                                                  | ⊕○○○<br>Very low | CRITICAL  |
| <b>Pain</b>                                                                               |               |                  |               |                |             |                             |                |               |                   |                                                                                      |                                                  |                  |           |
| 1                                                                                         |               |                  |               |                |             |                             |                |               |                   |                                                                                      |                                                  |                  |           |
| <b>Pain - perceived pain score – 1 week post-op</b>                                       |               |                  |               |                |             |                             |                |               |                   |                                                                                      |                                                  |                  |           |
| 1                                                                                         | Friemert 2006 | randomised trial | very serious  | not assessable | not serious | very serious <sup>a,c</sup> | none           | 30            | 30                | The authors reported no statistically significant difference between the two groups. |                                                  | ⊕○○○<br>Very low | CRITICAL  |
| <b>Laxity</b>                                                                             |               |                  |               |                |             |                             |                |               |                   |                                                                                      |                                                  |                  |           |
| 1                                                                                         |               |                  |               |                |             |                             |                |               |                   |                                                                                      |                                                  |                  |           |
| <b>Laxity - patients with &lt;3mm difference between limbs – 1 month post-op</b>          |               |                  |               |                |             |                             |                |               |                   |                                                                                      |                                                  |                  |           |
| 1                                                                                         | Rosen 1992    | randomised trial | very serious  | not assessable | not serious | very serious <sup>a,d</sup> | none           | 23/25 (92.0%) | 21/25 (84.0%)     | RR 1.10 (0.89 to 1.35)                                                               | 84 more per 1,000 (from 92 fewer to 294 more)    | ⊕○○○<br>Very low | CRITICAL  |
| <b>Laxity - patients with 3-5mm difference between limbs – 2 months post-op</b>           |               |                  |               |                |             |                             |                |               |                   |                                                                                      |                                                  |                  |           |
| 1                                                                                         | Rosen 1992    | randomised trial | very serious  | not assessable | not serious | very serious <sup>a,d</sup> | none           | 0/25 (0.0%)   | 2/25 (8.0%)       | RR 0.20 (0.01 to 3.97)                                                               | 64 fewer per 1,000 (from 79 fewer to 238 more)   | ⊕○○○<br>Very low | CRITICAL  |
| <b>Laxity - patients with &lt;3mm difference between limbs at 89N – 6 months post-op</b>  |               |                  |               |                |             |                             |                |               |                   |                                                                                      |                                                  |                  |           |
| 1                                                                                         | Rosen 1992    | randomised trial | very serious  | not assessable | not serious | very serious <sup>a,d</sup> | none           | 19/25 (76.0%) | 21/25 (84.0%)     | RR 0.90 (0.68 to 1.20)                                                               | 84 fewer per 1,000 (from 269 fewer to 168 more)  | ⊕○○○<br>Very low | CRITICAL  |
| <b>Laxity - patients with 3-5mm difference between limbs at 89N – 6 months post-op</b>    |               |                  |               |                |             |                             |                |               |                   |                                                                                      |                                                  |                  |           |
| 1                                                                                         | Rosen 1992    | randomised trial | very serious  | not assessable | not serious | very serious <sup>a,d</sup> | none           | 4/25 (16.0%)  | 3/25 (12.0%)      | RR 1.33 (0.33 to 5.36)                                                               | 40 more per 1,000 (from 80 fewer to 523 more)    | ⊕○○○<br>Very low | CRITICAL  |
| <b>Laxity - patients with &gt;5mm difference between limbs at 89N – 6 months post-op</b>  |               |                  |               |                |             |                             |                |               |                   |                                                                                      |                                                  |                  |           |
| 1                                                                                         | Rosen 1992    | randomised trial | very serious  | not assessable | not serious | very serious <sup>a,d</sup> | none           | 0/25 (0.0%)   | 1/25 (4.0%)       | RR 0.33 (0.01 to 7.81)                                                               | 27 fewer per 1,000 (from 40 fewer to 272 more)   | ⊕○○○<br>Very low | CRITICAL  |
| <b>Laxity - patients with &lt;3mm difference between limbs at max – 6 months post-op</b>  |               |                  |               |                |             |                             |                |               |                   |                                                                                      |                                                  |                  |           |
| 1                                                                                         | Rosen 1992    | randomised trial | very serious  | not assessable | not serious | very serious <sup>a,d</sup> | none           | 15/25 (60.0%) | 19/25 (76.0%)     | RR 0.79 (0.54 to 1.16)                                                               | 160 fewer per 1,000 (from 350 fewer to 122 more) | ⊕○○○<br>Very low | CRITICAL  |
| <b>Laxity - patients with 3-5mm difference between limbs at max – 6 months post-op</b>    |               |                  |               |                |             |                             |                |               |                   |                                                                                      |                                                  |                  |           |
| 1                                                                                         | Rosen 1992    | randomised trial | very serious  | not assessable | not serious | very serious <sup>a,d</sup> | none           | 1/25 (4.0%)   | 1/25 (4.0%)       | RR 1.00 (0.07 to 15.12)                                                              | 0 fewer per 1,000 (from 37 fewer to 565 more)    | ⊕○○○<br>Very low | CRITICAL  |
| <b>Laxity - patients with &gt;5mm difference between limbs at max – 6 months post-op</b>  |               |                  |               |                |             |                             |                |               |                   |                                                                                      |                                                  |                  |           |
| 1                                                                                         | Rosen 1992    | randomised trial | very serious  | not assessable | not serious | very serious <sup>a</sup>   | none           | 2/25 (8.0%)   | 0/25 (0.0%)       | RR 5.00 (0.25 to 99.16)                                                              | NA <sup>e</sup>                                  | ⊕○○○<br>Very low | CRITICAL  |
| <b>Atrophy</b>                                                                            |               |                  |               |                |             |                             |                |               |                   |                                                                                      |                                                  |                  |           |
| 1                                                                                         |               |                  |               |                |             |                             |                |               |                   |                                                                                      |                                                  |                  |           |
| <b>Atrophy - 7.5cm above patella (better indicated by lower values) – 6 weeks post-op</b> |               |                  |               |                |             |                             |                |               |                   |                                                                                      |                                                  |                  |           |
| 1                                                                                         | Engstrom 1995 | randomised trial | very serious  | not assessable | not serious | very serious <sup>a,b</sup> | none           | 17            | 17                | SMD 0.06 higher (0.61 lower to 0.74 higher)                                          |                                                  | ⊕○○○<br>Very low | IMPORTANT |

| Certainty assessment                                                                             |                     |              |                |              |                              |                      | No of patients |               | Effect                                                                                                                                                                                                                                                                                                   |                   | Certainty        | Importance |
|--------------------------------------------------------------------------------------------------|---------------------|--------------|----------------|--------------|------------------------------|----------------------|----------------|---------------|----------------------------------------------------------------------------------------------------------------------------------------------------------------------------------------------------------------------------------------------------------------------------------------------------------|-------------------|------------------|------------|
| No of studies                                                                                    | Study design        | Risk of bias | Inconsistency  | Indirectness | Imprecision                  | Other considerations | CPM            | Active motion | Relative (95% CI)                                                                                                                                                                                                                                                                                        | Absolute (95% CI) |                  |            |
| <b>Atrophy - 15cm above patella (better indicated by lower values) – 6 weeks post-op</b>         |                     |              |                |              |                              |                      |                |               |                                                                                                                                                                                                                                                                                                          |                   |                  |            |
| 1<br>Engstrom<br>1995                                                                            | randomised<br>trial | very serious | not assessable | not serious  | very serious <sup>a, b</sup> | none                 | 17             | 17            | SMD 0<br>(0.67 lower to 0.67 higher)                                                                                                                                                                                                                                                                     |                   | ⊕○○○<br>Very low | IMPORTANT  |
| <b>PROM</b>                                                                                      |                     |              |                |              |                              |                      |                |               |                                                                                                                                                                                                                                                                                                          |                   |                  |            |
| 1                                                                                                |                     |              |                |              |                              |                      |                |               |                                                                                                                                                                                                                                                                                                          |                   |                  |            |
| <b>PROM - IKDC score (better indicated by higher values) – 6 months post-op</b>                  |                     |              |                |              |                              |                      |                |               |                                                                                                                                                                                                                                                                                                          |                   |                  |            |
| Rosen<br>1992                                                                                    | randomised<br>trial | very serious | not assessable | not serious  | very serious <sup>a, b</sup> | none                 | 25             | 25            | SMD 0.12 higher<br>(0.44 lower to 0.67 higher)                                                                                                                                                                                                                                                           |                   | ⊕○○○<br>Very low | CRITICAL   |
| <b>Proprioception</b>                                                                            |                     |              |                |              |                              |                      |                |               |                                                                                                                                                                                                                                                                                                          |                   |                  |            |
| 1                                                                                                |                     |              |                |              |                              |                      |                |               |                                                                                                                                                                                                                                                                                                          |                   |                  |            |
| <b>Proprioception - joint position sense (better indicated by lower values) – 1 week post-op</b> |                     |              |                |              |                              |                      |                |               |                                                                                                                                                                                                                                                                                                          |                   |                  |            |
| 1<br>Friemert<br>2006                                                                            | randomised<br>trial | very serious | not assessable | not serious  | very serious <sup>a, b</sup> | none                 | 30             | 30            | SMD 1.54 higher<br>(0.96 higher to 2.12 higher)                                                                                                                                                                                                                                                          |                   | ⊕○○○<br>Very low | IMPORTANT  |
| <b>Adverse events</b>                                                                            |                     |              |                |              |                              |                      |                |               |                                                                                                                                                                                                                                                                                                          |                   |                  |            |
| Rosen<br>1992                                                                                    |                     |              |                |              |                              |                      |                |               | 17% complained about loss of sleep. During hospitalisation the CPM was used at least 20h/day. 4 patients needed manipulation. These patients were split relatively evenly across their 3 groups. At 6 months, 3 more patient had manipulation. All patients had an area on numbness around the incision. |                   |                  | CRITICAL   |
| Engstrom<br>1995                                                                                 |                     |              |                |              |                              |                      |                |               | None reported                                                                                                                                                                                                                                                                                            |                   |                  | CRITICAL   |
| Friemert<br>2006                                                                                 |                     |              |                |              |                              |                      |                |               | None reported                                                                                                                                                                                                                                                                                            |                   |                  | CRITICAL   |
| <b>Cost</b>                                                                                      |                     |              |                |              |                              |                      |                |               |                                                                                                                                                                                                                                                                                                          |                   |                  |            |
| Rosen<br>1992                                                                                    |                     |              |                |              |                              |                      |                |               | The cost of physical therapy for 1 month, based on three sessions a week for 4 weeks at \$70 per session, was \$840. The cost of CPM rental for 1 month was \$1800.                                                                                                                                      |                   |                  | CRITICAL   |

CI: confidence interval; SMD: standardised mean difference; RR: risk ratio

- a. Total participants <800
- b. 95% CI of an SMD extends > 0.5 points in either direction
- c. Not reporting results or SDs
- d. 95% CI boundaries cross the arbitrary thresholds of 0.75 and 1.25
- e. Due to zero events in the comparator arm, an absolute risk reduction was not estimable

## Long-use CPM (14 days) versus short-use CPM (4 days) in rehabilitation after ACLR

Bibliography: Richmond 1991

| Certainty assessment                                                         |                     |              |                |              |                              |                      | No of patients |               | Effect                                         |                   | Certainty | Importance |
|------------------------------------------------------------------------------|---------------------|--------------|----------------|--------------|------------------------------|----------------------|----------------|---------------|------------------------------------------------|-------------------|-----------|------------|
| No of studies                                                                | Study design        | Risk of bias | Inconsistency  | Indirectness | Imprecision                  | Other considerations | Long-use CPM   | Short-use CPM | Relative (95% CI)                              | Absolute (95% CI) |           |            |
| <b>Range of motion (ROM)</b>                                                 |                     |              |                |              |                              |                      |                |               |                                                |                   |           |            |
| 1                                                                            |                     |              |                |              |                              |                      |                |               |                                                |                   |           |            |
| <b>ROM - flexion (better indicated by higher values) – 1 week post-op</b>    |                     |              |                |              |                              |                      |                |               |                                                |                   |           |            |
| 1<br>Richmond<br>1991                                                        | randomised<br>trial | serious      | not assessable | not serious  | very serious <sup>a, b</sup> | none                 | 9              | 10            | SMD 1.11 higher<br>(0.13 higher to 2.1 higher) | ⊕○○○<br>Very low  |           | CRITICAL   |
| <b>ROM - flexion (better indicated by higher values) – 2 weeks post-op</b>   |                     |              |                |              |                              |                      |                |               |                                                |                   |           |            |
| 1<br>Richmond<br>1991                                                        | randomised<br>trial | serious      | not assessable | not serious  | very serious <sup>a, b</sup> | none                 | 9              | 10            | SMD 0.94 higher<br>(0.02 lower to 1.91 higher) | ⊕○○○<br>Very low  |           | CRITICAL   |
| <b>ROM - flexion (better indicated by higher values) – 6 weeks post-op</b>   |                     |              |                |              |                              |                      |                |               |                                                |                   |           |            |
| 1<br>Richmond<br>1991                                                        | randomised<br>trial | serious      | not assessable | not serious  | very serious <sup>a, b</sup> | none                 | 9              | 10            | SMD 0.15 lower<br>(1.05 lower to 0.75 higher)  | ⊕○○○<br>Very low  |           | CRITICAL   |
| <b>ROM - extension (better indicated by lower values) – 1 week post-op</b>   |                     |              |                |              |                              |                      |                |               |                                                |                   |           |            |
| 1<br>Richmond<br>1991                                                        | randomised<br>trial | serious      | not assessable | not serious  | very serious <sup>a, b</sup> | none                 | 9              | 10            | SMD 2.63 lower<br>(3.93 lower to 1.33 lower)   | ⊕○○○<br>Very low  |           | CRITICAL   |
| <b>ROM - extension (better indicated by lower values) – 2 weeks post-op</b>  |                     |              |                |              |                              |                      |                |               |                                                |                   |           |            |
| 1<br>Richmond<br>1991                                                        | randomised<br>trial | serious      | not assessable | not serious  | very serious <sup>a, b</sup> | none                 | 9              | 10            | SMD 1.31 lower<br>(2.32 lower to 0.29 lower)   | ⊕○○○<br>Very low  |           | CRITICAL   |
| <b>ROM - extension (better indicated by lower values) – 6 months post-op</b> |                     |              |                |              |                              |                      |                |               |                                                |                   |           |            |
| 1<br>Richmond<br>1991                                                        | randomised<br>trial | serious      | not assessable | not serious  | very serious <sup>a, b</sup> | none                 | 9              | 10            | SMD 2.31 lower<br>(3.53 lower to 1.09 lower)   | ⊕○○○<br>Very low  |           | CRITICAL   |
| <b>ROM - extension (better indicated by lower values) – 6 weeks post-op</b>  |                     |              |                |              |                              |                      |                |               |                                                |                   |           |            |
| 1<br>Richmond<br>1991                                                        | randomised<br>trial | serious      | not assessable | not serious  | very serious <sup>a, b</sup> | none                 | 9              | 10            | SMD 3.1 lower<br>(4.53 lower to 1.68 lower)    | ⊕○○○<br>Very low  |           | CRITICAL   |
| <b>Swelling</b>                                                              |                     |              |                |              |                              |                      |                |               |                                                |                   |           |            |
| 1                                                                            |                     |              |                |              |                              |                      |                |               |                                                |                   |           |            |
| <b>Swelling - (better indicated by lower values) – 1 week post-op</b>        |                     |              |                |              |                              |                      |                |               |                                                |                   |           |            |
| 1<br>Richmond<br>1991                                                        | randomised<br>trial | very serious | not assessable | not serious  | very serious <sup>a, b</sup> | none                 | 9              | 10            | SMD 1.48 lower<br>(2.52 lower to 0.44 lower)   | ⊕○○○<br>Very low  |           | CRITICAL   |
| <b>Swelling - (better indicated by lower values) – 2 weeks post-op</b>       |                     |              |                |              |                              |                      |                |               |                                                |                   |           |            |
| 1<br>Richmond<br>1991                                                        | randomised<br>trial | very serious | not assessable | not serious  | very serious <sup>a, b</sup> | none                 | 9              | 10            | SMD 2.4 lower<br>(3.64 lower to 1.16 lower)    | ⊕○○○<br>Very low  |           | CRITICAL   |
| <b>Swelling - (better indicated by lower values) – 4 weeks post-op</b>       |                     |              |                |              |                              |                      |                |               |                                                |                   |           |            |
| 1<br>Richmond<br>1991                                                        | randomised<br>trial | very serious | not assessable | not serious  | very serious <sup>a, b</sup> | none                 | 9              | 10            | SMD 0.51 higher<br>(0.41 lower to 1.43 higher) | ⊕○○○<br>Very low  |           | CRITICAL   |
| <b>Swelling - (better indicated by lower values) – 6 weeks post-op</b>       |                     |              |                |              |                              |                      |                |               |                                                |                   |           |            |
| 1<br>Richmond<br>1991                                                        | randomised<br>trial | very serious | not assessable | not serious  | very serious <sup>a, b</sup> | none                 | 9              | 10            | SMD 1.27 lower<br>(2.27 lower to 0.26 lower)   | ⊕○○○<br>Very low  |           | CRITICAL   |
| <b>Laxity</b>                                                                |                     |              |                |              |                              |                      |                |               |                                                |                   |           |            |
| 1                                                                            |                     |              |                |              |                              |                      |                |               |                                                |                   |           |            |
| <b>Laxity KT-1000 (better indicated by lower values) – 6 weeks post-op</b>   |                     |              |                |              |                              |                      |                |               |                                                |                   |           |            |

53

Aspetar clinical practice guideline on rehabilitation after ACLR: Supplementary file

| Certainty assessment  |                     |              |                |              |                              |                      | No of patients |               | Effect                                       |                   | Certainty        | Importance |
|-----------------------|---------------------|--------------|----------------|--------------|------------------------------|----------------------|----------------|---------------|----------------------------------------------|-------------------|------------------|------------|
| No of studies         | Study design        | Risk of bias | Inconsistency  | Indirectness | Imprecision                  | Other considerations | Long-use CPM   | Short-use CPM | Relative (95% CI)                            | Absolute (95% CI) |                  |            |
| 1<br>Richmond<br>1991 | randomised<br>trial | serious      | not assessable | not serious  | very serious <sup>a, b</sup> | none                 | 9              | 10            | SMD 1.03 lower<br>(2.01 lower to 0.06 lower) |                   | ⊕○○○<br>Very low | CRITICAL   |
| <b>Adverse events</b> |                     |              |                |              |                              |                      |                |               |                                              |                   |                  |            |
| Richmond<br>1991      |                     |              |                |              |                              |                      |                |               | None reported                                |                   |                  | CRITICAL   |

CI: confidence interval; SMD: standardised mean difference

- a. Total participants <800
- b. 95% CI of an SMD extends > 0.5 points in either direction
- c. Not reporting results or SDs

## Cryotherapy versus no cryotherapy in rehabilitation after ACLR

Bibliography: Cohn 1989, Daniel 1994, Brandsson 1996, Konrath 1996, Edwards 1996, Barber 1998, Dervin 1998, Ohkoshi 1999, Koyonos 2014

| Certainty assessment                                                                    |                   |              |                                     |              |                              |                      | No of patients |                | Effect                                                                                                                                                                                             |                   | Certainty | Importance |
|-----------------------------------------------------------------------------------------|-------------------|--------------|-------------------------------------|--------------|------------------------------|----------------------|----------------|----------------|----------------------------------------------------------------------------------------------------------------------------------------------------------------------------------------------------|-------------------|-----------|------------|
| No of studies                                                                           | Study design      | Risk of bias | Inconsistency                       | Indirectness | Imprecision                  | Other considerations | Cryotherapy    | No cryotherapy | Relative (95% CI)                                                                                                                                                                                  | Absolute (95% CI) |           |            |
| <b>Pain - Medication use</b>                                                            |                   |              |                                     |              |                              |                      |                |                |                                                                                                                                                                                                    |                   |           |            |
| 9                                                                                       |                   |              |                                     |              |                              |                      |                |                |                                                                                                                                                                                                    |                   |           |            |
| <b>Medication use - medication use Demerol (better indicated by lower values)</b>       |                   |              |                                     |              |                              |                      |                |                |                                                                                                                                                                                                    |                   |           |            |
| 1<br>Cohn 1989                                                                          | randomised trial  | very serious | not assessable                      | not serious  | very serious <sup>a, b</sup> | none                 | 26             | 28             | SMD <b>0.82 lower</b><br>(1.37 lower to 0.26 lower)                                                                                                                                                | ⊕○○○<br>Very low  | CRITICAL  |            |
| <b>Medication use - medication use Vicodin (better indicated by lower values)</b>       |                   |              |                                     |              |                              |                      |                |                |                                                                                                                                                                                                    |                   |           |            |
| 1<br>Cohn 1989                                                                          | randomised trial  | very serious | not assessable                      | not serious  | very serious <sup>a, b</sup> | none                 | 26             | 28             | SMD <b>0.28 higher</b><br>(0.26 lower to 0.82 higher)                                                                                                                                              | ⊕○○○<br>Very low  | CRITICAL  |            |
| Barber 1998                                                                             | randomised trial  | very serious | not assessable                      | not serious  | very serious <sup>a, c</sup> | none                 | 51             | 49             | SDs are not reported. Noncold patients' average postoperative Vicodin use was always greater than the cold patients' use (P =0.013) varying from 125% more on day 2 (P=0.001) to 5% more on day 7. | ⊕○○○<br>Very low  | CRITICAL  |            |
| <b>Medication use - medication use Vistaril (better indicated by lower values)</b>      |                   |              |                                     |              |                              |                      |                |                |                                                                                                                                                                                                    |                   |           |            |
| 1<br>Cohn 1989                                                                          | randomised trial  | very serious | not assessable                      | not serious  | very serious <sup>a, b</sup> | none                 | 26             | 28             | SMD <b>0.84 lower</b><br>(1.40 lower to 0.28 lower)                                                                                                                                                | ⊕○○○<br>Very low  | CRITICAL  |            |
| <b>Medication use - medication use Meperidine (better indicated by lower values)</b>    |                   |              |                                     |              |                              |                      |                |                |                                                                                                                                                                                                    |                   |           |            |
| 1<br>Daniel 1994                                                                        | randomised trial  | very serious | not assessable                      | not serious  | very serious <sup>a, b</sup> | none                 | 16             | 42             | SMD <b>0.21 higher</b><br>(0.37 lower to 0.79 higher)                                                                                                                                              | ⊕○○○<br>Very low  | CRITICAL  |            |
| Konrath 1996                                                                            | randomised trial  | very serious | not assessable                      | not serious  | very serious <sup>a, c</sup> | none                 | 27             | 27             | SDs are not reported. The authors reported no statistically significant difference between the two groups                                                                                          | ⊕○○○<br>Very low  | CRITICAL  |            |
| <b>Medication use - medication use Codeine (better indicated by lower values)</b>       |                   |              |                                     |              |                              |                      |                |                |                                                                                                                                                                                                    |                   |           |            |
| 4<br>Daniel 1994<br>Brandsson 1996<br>Edwards 1996<br>Dervin 1998                       | randomised trials | very serious | very serious<br>I <sup>2</sup> =91% | not serious  | very serious <sup>a, b</sup> | none                 | 102            | 114            | SMD <b>0.86 lower</b><br>(1.93 lower to 0.21 higher)                                                                                                                                               | ⊕○○○<br>Very low  | CRITICAL  |            |
| <b>Medication use - medication use Morphine (better indicated by lower values)</b>      |                   |              |                                     |              |                              |                      |                |                |                                                                                                                                                                                                    |                   |           |            |
| 3<br>Brandsson 1996<br>Edwards 1996<br>Dervin 1998                                      | randomised trials | very serious | very serious<br>I <sup>2</sup> =94% | not serious  | very serious <sup>a, b</sup> | none                 | 86             | 72             | SMD <b>1.04 lower</b><br>(2.53 lower to 0.46 higher)                                                                                                                                               | ⊕○○○<br>Very low  | CRITICAL  |            |
| Konrath 1996                                                                            | randomised trial  | very serious | not assessable                      | not serious  | very serious <sup>a, c</sup> | none                 | 27             | 27             | SDs are not reported. The authors reported no statistically significant difference between the two groups                                                                                          | ⊕○○○<br>Very low  | CRITICAL  |            |
| <b>Medication use - medication use Hydrocodone (better indicated by lower values)</b>   |                   |              |                                     |              |                              |                      |                |                |                                                                                                                                                                                                    |                   |           |            |
| Konrath 1996                                                                            | randomised trial  | very serious | not assessable                      | not serious  | very serious <sup>a, c</sup> | none                 | 27             | 27             | SDs are not reported. The authors reported no statistically significant difference between the two groups                                                                                          | ⊕○○○<br>Very low  | CRITICAL  |            |
| <b>Medication use - medication use Acetaminophen (better indicated by lower values)</b> |                   |              |                                     |              |                              |                      |                |                |                                                                                                                                                                                                    |                   |           |            |
| 1<br>Edwards 1996                                                                       | randomised trial  | very serious | not assessable                      | not serious  | very serious <sup>a, b</sup> | none                 | 26             | 24             | SMD <b>0.06 higher</b><br>(0.49 lower to 0.62 higher)                                                                                                                                              | ⊕○○○<br>Very low  | CRITICAL  |            |
| <b>Medication use - medication use Diclofenac sodium</b>                                |                   |              |                                     |              |                              |                      |                |                |                                                                                                                                                                                                    |                   |           |            |

55

Aspetar clinical practice guideline on rehabilitation after ACLR: Supplementary file

| Certainty assessment                                                           |                     |                 |                |              |                              |                      | No of patients |                | Effect                                                                                                                                                                                                                                      |                   | Certainty        | Importance |
|--------------------------------------------------------------------------------|---------------------|-----------------|----------------|--------------|------------------------------|----------------------|----------------|----------------|---------------------------------------------------------------------------------------------------------------------------------------------------------------------------------------------------------------------------------------------|-------------------|------------------|------------|
| No of studies                                                                  | Study design        | Risk of bias    | Inconsistency  | Indirectness | Imprecision                  | Other considerations | Cryotherapy    | No cryotherapy | Relative (95% CI)                                                                                                                                                                                                                           | Absolute (95% CI) |                  |            |
| 1<br>Ohkoshi<br>1999                                                           | randomised<br>trial | very<br>serious | not assessable | not serious  | very serious <sup>a, b</sup> | none                 | 7              | 7              | SMD 0.31 lower<br>(1.36 lower to 0.75 higher)                                                                                                                                                                                               |                   | ⊕○○○<br>Very low | CRITICAL   |
| <b>Medication use - medication use Paracetamol</b>                             |                     |                 |                |              |                              |                      |                |                |                                                                                                                                                                                                                                             |                   |                  |            |
| Konrath<br>1996                                                                | randomised<br>trial | very<br>serious | not assessable | not serious  | very serious <sup>a, c</sup> | none                 | 27             | 27             | SDs are not reported. The authors reported no statistically significant difference between the two groups                                                                                                                                   |                   | ⊕○○○<br>Very low | CRITICAL   |
| <b>Medication use - medication use Percocet</b>                                |                     |                 |                |              |                              |                      |                |                |                                                                                                                                                                                                                                             |                   |                  |            |
| Koyonos<br>2014                                                                | randomised<br>trial | very<br>serious | not assessable | not serious  | very serious <sup>a, c</sup> | none                 | 27             | 26             | SDs are not reported. The authors reported 23% less medication used on the day of surgery and 26% less medication used on postoperative day 1. There was no significant difference in medication use between the groups during days 2 to 4. |                   | ⊕○○○<br>Very low | CRITICAL   |
| <b>Pain</b>                                                                    |                     |                 |                |              |                              |                      |                |                |                                                                                                                                                                                                                                             |                   |                  |            |
| 7                                                                              |                     |                 |                |              |                              |                      |                |                |                                                                                                                                                                                                                                             |                   |                  |            |
| <b>Pain - VAS scale (better indicated by lower values) – 1 hour post-op</b>    |                     |                 |                |              |                              |                      |                |                |                                                                                                                                                                                                                                             |                   |                  |            |
| 1<br>Brandsoon<br>1996                                                         | randomised<br>trial | very<br>serious | not assessable | not serious  | very serious <sup>a, b</sup> | none                 | 20             | 10             | SMD 4.13 lower<br>(5.49 lower to 2.78 lower)                                                                                                                                                                                                |                   | ⊕○○○<br>Very low | CRITICAL   |
| Barber<br>1998                                                                 | randomised<br>trial | very<br>serious | not assessable | not serious  | very serious <sup>a, c</sup> | none                 | 51             | 49             | SDs are not reported. The authors reported no statistically significant difference between the two groups                                                                                                                                   |                   | ⊕○○○<br>Very low | CRITICAL   |
| Koyonos<br>2014                                                                | randomised<br>trial | very<br>serious | not assessable | not serious  | very serious <sup>a, c</sup> | none                 | 27             | 26             | SDs are not reported. The authors reported 22% lower pain compared to the non-cryotherapy group                                                                                                                                             |                   | ⊕○○○<br>Very low | CRITICAL   |
| <b>Pain - VAS scale (better indicated by lower values) – 2 hours post-op</b>   |                     |                 |                |              |                              |                      |                |                |                                                                                                                                                                                                                                             |                   |                  |            |
| 1<br>Brandsoon<br>1996                                                         | randomised<br>trial | very<br>serious | not assessable | not serious  | very serious <sup>a, b</sup> | none                 | 20             | 10             | SMD 4.37 lower<br>(5.78 lower to 2.96 lower)                                                                                                                                                                                                |                   | ⊕○○○<br>Very low | CRITICAL   |
| Barber<br>1998                                                                 | randomised<br>trial | very<br>serious | not assessable | not serious  | very serious <sup>a, c</sup> | none                 | 51             | 49             | SDs are not reported. The authors reported no statistically significant difference between the two groups                                                                                                                                   |                   | ⊕○○○<br>Very low | CRITICAL   |
| <b>Pain - VAS scale (better indicated by lower values) – 4 hours post-op</b>   |                     |                 |                |              |                              |                      |                |                |                                                                                                                                                                                                                                             |                   |                  |            |
| 1<br>Brandsoon<br>1996                                                         | randomised<br>trial | very<br>serious | not assessable | not serious  | very serious <sup>a, b</sup> | none                 | 20             | 10             | SMD 3.25 lower<br>(4.41 lower to 2.09 lower)                                                                                                                                                                                                |                   | ⊕○○○<br>Very low | CRITICAL   |
| <b>Pain - VAS scale (better indicated by lower values) – 6-8 hours post-op</b> |                     |                 |                |              |                              |                      |                |                |                                                                                                                                                                                                                                             |                   |                  |            |
| 1<br>Brandsoon<br>1996                                                         | randomised<br>trial | very<br>serious | not assessable | not serious  | very serious <sup>a, b</sup> | none                 | 20             | 10             | SMD 3.41 lower<br>(4.6 lower to 2.21 lower)                                                                                                                                                                                                 |                   | ⊕○○○<br>Very low | CRITICAL   |
| Barber<br>1998                                                                 | randomised<br>trial | very<br>serious | not assessable | not serious  | very serious <sup>a, c</sup> | none                 | 51             | 49             | SDs are not reported. The authors reported no statistically significant difference between the two groups                                                                                                                                   |                   | ⊕○○○<br>Very low | CRITICAL   |
| <b>Pain - VAS scale (better indicated by lower values) – 12 hours post-op</b>  |                     |                 |                |              |                              |                      |                |                |                                                                                                                                                                                                                                             |                   |                  |            |
| Koyonos<br>2014                                                                | randomised<br>trial | very<br>serious | not assessable | not serious  | very serious <sup>a, c</sup> | none                 | 27             | 27             | SDs are not reported. The authors reported 22% lower pain compared to the non-cryotherapy group                                                                                                                                             |                   | ⊕○○○<br>Very low | CRITICAL   |
| Edwards<br>1996                                                                | randomised<br>trial | very<br>serious | not assessable | not serious  | very serious <sup>a, c</sup> | none                 | 26             | 24             | SDs are not reported. The authors reported no statistically significant difference between the two groups                                                                                                                                   |                   | ⊕○○○<br>Very low | CRITICAL   |
| <b>Pain - VAS scale (better indicated by lower values) – 1 day post-op</b>     |                     |                 |                |              |                              |                      |                |                |                                                                                                                                                                                                                                             |                   |                  |            |

| Certainty assessment                                                              |                   |              |                                     |              |                              |                      | No of patients |                | Effect                                                                                                                                                                                                                              |                                                   | Certainty        | Importance |
|-----------------------------------------------------------------------------------|-------------------|--------------|-------------------------------------|--------------|------------------------------|----------------------|----------------|----------------|-------------------------------------------------------------------------------------------------------------------------------------------------------------------------------------------------------------------------------------|---------------------------------------------------|------------------|------------|
| No of studies                                                                     | Study design      | Risk of bias | Inconsistency                       | Indirectness | Imprecision                  | Other considerations | Cryotherapy    | No cryotherapy | Relative (95% CI)                                                                                                                                                                                                                   | Absolute (95% CI)                                 |                  |            |
| 3<br>Brandsoon 1996<br>Ohkoshi 1999<br>Dervin 1998                                | randomised trials | very serious | very serious<br>I <sup>2</sup> =94% | not serious  | very serious <sup>a, b</sup> | none                 | 67             | 55             | SMD 1.24 lower<br>(3.34 lower to 0.86 higher)                                                                                                                                                                                       |                                                   | ⊕○○○<br>Very low | CRITICAL   |
| Edwards 1996                                                                      | randomised trial  | very serious | not assessable                      | not serious  | very serious <sup>a, c</sup> | none                 | 26             | 24             | SDs are not reported. The authors reported no statistically significant difference between the two groups                                                                                                                           |                                                   | ⊕○○○<br>Very low | CRITICAL   |
| Koyonos 2014                                                                      | randomised trial  | very serious | not assessable                      | not serious  | very serious <sup>a, c</sup> | none                 | 27             | 26             | SDs are not reported. The authors reported 26% lower pain compared to the non-cryotherapy group                                                                                                                                     |                                                   | ⊕○○○<br>Very low | CRITICAL   |
| Barber 1998                                                                       | randomised trial  | very serious | not assessable                      | not serious  | very serious <sup>a, c</sup> | none                 | 51             | 49             | SDs are not reported. The authors reported no statistically significant difference between the two groups                                                                                                                           |                                                   | ⊕○○○<br>Very low | CRITICAL   |
| <b>Pain - VAS scale (better indicated by lower values) – 2 days post-op</b>       |                   |              |                                     |              |                              |                      |                |                |                                                                                                                                                                                                                                     |                                                   |                  |            |
| 2<br>Brandsoon 1996<br>Ohkoshi 1999                                               | randomised trials | very serious | very serious<br>I <sup>2</sup> =96% | not serious  | very serious <sup>a, b</sup> | none                 | 27             | 17             | SMD 1.51 lower<br>(5.61 lower to 2.59 higher)                                                                                                                                                                                       |                                                   | ⊕○○○<br>Very low | CRITICAL   |
| Barber 1998                                                                       | randomised trial  | very serious | not assessable                      | not serious  | very serious <sup>a, c</sup> | none                 | 51             | 49             | SDs are not reported. The authors reported no statistically significant difference between the two groups. Noncold patients' average VAS pain was 25% more in the first postoperative day than the cold patients' VAS pain (P=.059) |                                                   | ⊕○○○<br>Very low | CRITICAL   |
| Edwards 1996                                                                      | randomised trial  | very serious | not assessable                      | not serious  | very serious <sup>a, c</sup> | none                 | 26             | 24             | SDs are not reported. The authors reported no statistically significant difference between the two groups                                                                                                                           |                                                   | ⊕○○○<br>Very low | CRITICAL   |
| Koyonos 2014                                                                      | randomised trial  | very serious | not assessable                      | not serious  | very serious <sup>a, c</sup> | none                 | 27             | 26             | SDs are not reported. The authors reported no significant difference.                                                                                                                                                               |                                                   | ⊕○○○<br>Very low | CRITICAL   |
| <b>Pain - VAS scale (better indicated by lower values) – 3 days post-op</b>       |                   |              |                                     |              |                              |                      |                |                |                                                                                                                                                                                                                                     |                                                   |                  |            |
| 1<br>Daniel 1994                                                                  | randomised trial  | very serious | not assessable                      | not serious  | very serious <sup>a, b</sup> | none                 | 16             | 42             | SMD 0.24 lower<br>(0.82 lower to 0.33 higher)                                                                                                                                                                                       |                                                   | ⊕○○○<br>Very low | CRITICAL   |
| Barber 1998                                                                       | randomised trial  | very serious | not assessable                      | not serious  | very serious <sup>a, c</sup> | none                 | 51             | 49             | SDs are not reported. The authors reported no significant difference.                                                                                                                                                               |                                                   | ⊕○○○<br>Very low | CRITICAL   |
| Edwards 1996                                                                      | randomised trial  | very serious | not assessable                      | not serious  | very serious <sup>a, c</sup> | none                 | 26             | 24             | SDs are not reported. The authors reported no statistically significant difference between the two groups                                                                                                                           |                                                   | ⊕○○○<br>Very low | CRITICAL   |
| Koyonos 2014                                                                      | randomised trial  | very serious | not assessable                      | not serious  | very serious <sup>a, c</sup> | none                 | 27             | 26             | SDs are not reported. The authors reported no significant difference.                                                                                                                                                               |                                                   | ⊕○○○<br>Very low | CRITICAL   |
| <b>Pain - VAS scale (better indicated by lower values) – 6 days post-op</b>       |                   |              |                                     |              |                              |                      |                |                |                                                                                                                                                                                                                                     |                                                   |                  |            |
| Barber 1998                                                                       | randomised trial  | very serious | not assessable                      | not serious  | very serious <sup>a, c</sup> | none                 | 51             | 49             | SDs are not reported. The authors reported no significant difference.                                                                                                                                                               |                                                   | ⊕○○○<br>Very low | CRITICAL   |
| <b>Patient satisfaction with their postoperative pain relief – 2 days post-op</b> |                   |              |                                     |              |                              |                      |                |                |                                                                                                                                                                                                                                     |                                                   |                  |            |
| Brandsoon 1996                                                                    | randomised trial  | very serious | not assessable                      | not serious  | very serious <sup>a, d</sup> | none                 | 16/20 (80.0%)  | 3/10 (30.0%)   | RR 2.67<br>(1.01 to 7.05)                                                                                                                                                                                                           | 501 more per 1,000<br>(from 3 more to 1,000 more) | ⊕○○○<br>Very low | CRITICAL   |
| <b>Swelling</b>                                                                   |                   |              |                                     |              |                              |                      |                |                |                                                                                                                                                                                                                                     |                                                   |                  |            |
| 6                                                                                 |                   |              |                                     |              |                              |                      |                |                |                                                                                                                                                                                                                                     |                                                   |                  |            |
| <b>Swelling - knee circumference – 3 days post-op</b>                             |                   |              |                                     |              |                              |                      |                |                |                                                                                                                                                                                                                                     |                                                   |                  |            |

| Certainty assessment                                                                                 |                      |                 |                                |              |                              |                      | No of patients |                | Effect                                                                                                    |                   | Certainty        | Importance |
|------------------------------------------------------------------------------------------------------|----------------------|-----------------|--------------------------------|--------------|------------------------------|----------------------|----------------|----------------|-----------------------------------------------------------------------------------------------------------|-------------------|------------------|------------|
| No of studies                                                                                        | Study design         | Risk of bias    | Inconsistency                  | Indirectness | Imprecision                  | Other considerations | Cryotherapy    | No cryotherapy | Relative (95% CI)                                                                                         | Absolute (95% CI) |                  |            |
| 1<br>Daniel<br>1994                                                                                  | randomised<br>trial  | very<br>serious | not assessable                 | not serious  | very serious <sup>a, c</sup> | none                 | 16             | 42             | SDs are not reported. The authors reported no significant difference.                                     |                   | ⊕○○○<br>Very low | CRITICAL   |
| <b>Swelling - knee circumference – 7 days post-op</b>                                                |                      |                 |                                |              |                              |                      |                |                |                                                                                                           |                   |                  |            |
| Barber<br>1998                                                                                       | randomised<br>trial  | very<br>serious | not assessable                 | not serious  | very serious <sup>a, c</sup> | none                 | 51             | 49             | SDs are not reported. The authors reported no significant difference.                                     |                   | ⊕○○○<br>Very low | CRITICAL   |
| <b>Swelling - knee circumference – 12 days post-op</b>                                               |                      |                 |                                |              |                              |                      |                |                |                                                                                                           |                   |                  |            |
| 1<br>Daniel<br>1994                                                                                  | randomised<br>trial  | very<br>serious | not assessable                 | not serious  | very serious <sup>a, c</sup> | none                 | 16             | 42             | SDs are not reported. The authors reported no significant difference.                                     |                   | ⊕○○○<br>Very low | CRITICAL   |
| <b>Swelling - drainage volume (better indicated by lower values)</b>                                 |                      |                 |                                |              |                              |                      |                |                |                                                                                                           |                   |                  |            |
| 3<br>Dervin<br>1998<br>Edwards<br>1996<br>Ohkoshi<br>1999                                            | randomised<br>trials | very<br>serious | serious<br>I <sup>2</sup> =65% | not serious  | very serious <sup>a, b</sup> | none                 | 73             | 69             | SMD <b>0.33 lower</b><br>(0.98 lower to 0.33 higher)                                                      |                   | ⊕○○○<br>Very low | CRITICAL   |
| Konrath<br>1996                                                                                      | randomised<br>trial  | very<br>serious | not assessable                 | not serious  | very serious <sup>a, c</sup> | none                 | 27             | 27             | SDs are not reported. The authors reported no statistically significant difference between the two groups |                   | ⊕○○○<br>Very low | CRITICAL   |
| <b>Range of motion (ROM)</b>                                                                         |                      |                 |                                |              |                              |                      |                |                |                                                                                                           |                   |                  |            |
| 5                                                                                                    |                      |                 |                                |              |                              |                      |                |                |                                                                                                           |                   |                  |            |
| <b>ROM - flexion – 2-3 days post-op</b>                                                              |                      |                 |                                |              |                              |                      |                |                |                                                                                                           |                   |                  |            |
| Daniel<br>1994                                                                                       | randomised<br>trial  | very<br>serious | not assessable                 | not serious  | very serious <sup>a, c</sup> | none                 | 16             | 42             | SDs are not reported. The authors reported no significant difference.                                     |                   | ⊕○○○<br>Very low | CRITICAL   |
| Konrath<br>1996                                                                                      | randomised<br>trial  | very<br>serious | not assessable                 | not serious  | very serious <sup>a, c</sup> | none                 | 27             | 27             | SDs are not reported. The authors reported no statistically significant difference between the two groups |                   | ⊕○○○<br>Very low | CRITICAL   |
| Edwards<br>1996                                                                                      | randomised<br>trial  | very<br>serious | not assessable                 | not serious  | very serious <sup>a, c</sup> | none                 | 26             | 24             | SDs are not reported. The authors reported no statistically significant difference between the two groups |                   | ⊕○○○<br>Very low | CRITICAL   |
| <b>ROM - flexion (better indicated by higher values) – 7 days post-op</b>                            |                      |                 |                                |              |                              |                      |                |                |                                                                                                           |                   |                  |            |
| 1<br>Barber<br>1998                                                                                  | randomised<br>trial  | very<br>serious | not assessable                 | not serious  | serious <sup>a</sup>         | none                 | 51             | 49             | SMD <b>0.42 higher</b><br>(0.02 higher to 0.82 higher)                                                    |                   | ⊕○○○<br>Very low | CRITICAL   |
| <b>ROM - flexion (better indicated by higher values) – 12 days post-op</b>                           |                      |                 |                                |              |                              |                      |                |                |                                                                                                           |                   |                  |            |
| Daniel<br>1994                                                                                       | randomised<br>trial  | very<br>serious | not assessable                 | not serious  | very serious <sup>a, c</sup> | none                 | 16             | 42             | SDs are not reported. The authors reported no significant difference.                                     |                   | ⊕○○○<br>Very low | CRITICAL   |
| <b>ROM - days to 120° of flexion</b>                                                                 |                      |                 |                                |              |                              |                      |                |                |                                                                                                           |                   |                  |            |
| 1<br>Ohkoshi<br>1999                                                                                 | randomised<br>trial  | very<br>serious | not assessable                 | not serious  | very serious <sup>a, b</sup> | none                 | 7              | 7              | SMD <b>0.95 lower</b><br>(2.08 lower to 0.17 higher)                                                      |                   | ⊕○○○<br>Very low | CRITICAL   |
| <b>ROM - extension deficit – 3 days post-op</b>                                                      |                      |                 |                                |              |                              |                      |                |                |                                                                                                           |                   |                  |            |
| Daniel<br>1994                                                                                       | randomised<br>trial  | very<br>serious | not assessable                 | not serious  | very serious <sup>a, c</sup> | none                 | 16             | 42             | SDs are not reported. The authors reported no significant difference.                                     |                   | ⊕○○○<br>Very low | CRITICAL   |
| <b>ROM - extension deficit – 12 days post-op</b>                                                     |                      |                 |                                |              |                              |                      |                |                |                                                                                                           |                   |                  |            |
| Daniel<br>1994                                                                                       | randomised<br>trial  | very<br>serious | not assessable                 | not serious  | very serious <sup>a, c</sup> | none                 | 16             | 42             | SDs are not reported. The authors reported no significant difference.                                     |                   | ⊕○○○<br>Very low | CRITICAL   |
| <b>ROM - extension deficit – number of patients who failed full extension by 5° – 7 days post-op</b> |                      |                 |                                |              |                              |                      |                |                |                                                                                                           |                   |                  |            |

| Certainty assessment                                                                                  |                  |              |                |              |                              |                      | No of patients |                | Effect                                                                                                                                                                                                                                                                                                                                                                                                                                                                                                                                                                                                                                                  |                                                   | Certainty        | Importance |
|-------------------------------------------------------------------------------------------------------|------------------|--------------|----------------|--------------|------------------------------|----------------------|----------------|----------------|---------------------------------------------------------------------------------------------------------------------------------------------------------------------------------------------------------------------------------------------------------------------------------------------------------------------------------------------------------------------------------------------------------------------------------------------------------------------------------------------------------------------------------------------------------------------------------------------------------------------------------------------------------|---------------------------------------------------|------------------|------------|
| No of studies                                                                                         | Study design     | Risk of bias | Inconsistency  | Indirectness | Imprecision                  | Other considerations | Cryotherapy    | No cryotherapy | Relative (95% CI)                                                                                                                                                                                                                                                                                                                                                                                                                                                                                                                                                                                                                                       | Absolute (95% CI)                                 |                  |            |
| Barber 1998                                                                                           | randomised trial | very serious | not assessable | not serious  | very serious <sup>a, d</sup> | none                 | 27/51 (52.9%)  | 24/49 (49.0%)  | RR 1.08<br>(0.74 to 1.59)                                                                                                                                                                                                                                                                                                                                                                                                                                                                                                                                                                                                                               | 39 more per 1,000<br>(from 127 fewer to 289 more) | ⊕○○○<br>Very low | CRITICAL   |
| <b>ROM - extension deficit – number of patients who failed full extension by 10° – 7 days post-op</b> |                  |              |                |              |                              |                      |                |                |                                                                                                                                                                                                                                                                                                                                                                                                                                                                                                                                                                                                                                                         |                                                   |                  |            |
| Barber 1998                                                                                           | randomised trial | very serious | not assessable | not serious  | very serious <sup>a, d</sup> | none                 | 13/51 (25.5%)  | 11/49 (22.4%)  | RR 1.14<br>(0.56 to 2.29)                                                                                                                                                                                                                                                                                                                                                                                                                                                                                                                                                                                                                               | 31 more per 1,000<br>(from 99 fewer to 290 more)  | ⊕○○○<br>Very low | CRITICAL   |
| <b>Adverse events</b>                                                                                 |                  |              |                |              |                              |                      |                |                |                                                                                                                                                                                                                                                                                                                                                                                                                                                                                                                                                                                                                                                         |                                                   |                  |            |
| Cohn 1989                                                                                             |                  |              |                |              |                              |                      |                |                | There were no peroneal nerve palsies in the Hot/Ice patients. There was a transient peroneal nerve palsy in a 27-year-old female patient in the non-Hot/Ice group. Upon examination the morning following surgery, the patient was unable to dorsiflex her foot. There were no signs of pressure caused by the brace being too tight. Fortunately, the palsy resolved within 24 hours. Although it is difficult to be certain, our suspicion is that the palsy was caused by the ice bag being left on the knee for too long a period of time. In this case the ice bag had been left for nearly 40 minutes while the patient was in the recovery room. |                                                   |                  | CRITICAL   |
| Koyonos 2014                                                                                          |                  |              |                |              |                              |                      |                |                | None reported                                                                                                                                                                                                                                                                                                                                                                                                                                                                                                                                                                                                                                           |                                                   |                  | CRITICAL   |
| Barber 1998                                                                                           |                  |              |                |              |                              |                      |                |                | None reported                                                                                                                                                                                                                                                                                                                                                                                                                                                                                                                                                                                                                                           |                                                   |                  | CRITICAL   |
| Konrath 1996                                                                                          |                  |              |                |              |                              |                      |                |                | None reported                                                                                                                                                                                                                                                                                                                                                                                                                                                                                                                                                                                                                                           |                                                   |                  | CRITICAL   |
| Daniel 1994                                                                                           |                  |              |                |              |                              |                      |                |                | None reported                                                                                                                                                                                                                                                                                                                                                                                                                                                                                                                                                                                                                                           |                                                   |                  | CRITICAL   |
| Brandsoon 1996                                                                                        |                  |              |                |              |                              |                      |                |                | None reported                                                                                                                                                                                                                                                                                                                                                                                                                                                                                                                                                                                                                                           |                                                   |                  | CRITICAL   |
| Edwards 1996                                                                                          |                  |              |                |              |                              |                      |                |                | None reported                                                                                                                                                                                                                                                                                                                                                                                                                                                                                                                                                                                                                                           |                                                   |                  | CRITICAL   |
| Dervin 1998                                                                                           |                  |              |                |              |                              |                      |                |                | None reported                                                                                                                                                                                                                                                                                                                                                                                                                                                                                                                                                                                                                                           |                                                   |                  | CRITICAL   |
| Ohkoshi 1999                                                                                          |                  |              |                |              |                              |                      |                |                | None reported                                                                                                                                                                                                                                                                                                                                                                                                                                                                                                                                                                                                                                           |                                                   |                  | CRITICAL   |

CI: confidence interval; SMD: standardised mean difference; RR: risk ratio

- Total participants <800
- 95% CI of an SMD extends > 0.5 points in either direction
- Not reporting results or SDs
- 95% CI boundaries cross the arbitrary thresholds of 0.75 and 1.25

## Compressive cryotherapy versus cryotherapy alone in rehabilitation after ACLR

Bibliography: Schroder 1994, Ruffilli 2015, Kijkunasathian 2017, Waterman 2011, Dambros 2012

| Certainty assessment                                                                                           |                      |                 |                                   |              |                              |                      | N <sup>o</sup> of patients |              | Effect                                                                                                     |                                                              | Certainty        | Importance |
|----------------------------------------------------------------------------------------------------------------|----------------------|-----------------|-----------------------------------|--------------|------------------------------|----------------------|----------------------------|--------------|------------------------------------------------------------------------------------------------------------|--------------------------------------------------------------|------------------|------------|
| N <sup>o</sup> of studies                                                                                      | Study design         | Risk of bias    | Inconsistency                     | Indirectness | Imprecision                  | Other considerations | Compressive cryotherapy    | Cryotherapy  | Relative (95% CI)                                                                                          | Absolute (95% CI)                                            |                  |            |
| <b>Pain - medication use</b>                                                                                   |                      |                 |                                   |              |                              |                      |                            |              |                                                                                                            |                                                              |                  |            |
| 4                                                                                                              |                      |                 |                                   |              |                              |                      |                            |              |                                                                                                            |                                                              |                  |            |
| <b>Medication use - medication use Bupivacaine (better indicated by lower values)</b>                          |                      |                 |                                   |              |                              |                      |                            |              |                                                                                                            |                                                              |                  |            |
| 1<br>Schroder<br>1994                                                                                          | randomised<br>trial  | very<br>serious | not assessable                    | not serious  | very serious <sup>a, b</sup> | none                 | 21                         | 23           | SMD 0.46 higher<br>(0.14 lower to 1.06 higher)                                                             |                                                              | ⊕○○○<br>Very low | CRITICAL   |
| <b>Medication use - medication use Tramadol (better indicated by lower values)</b>                             |                      |                 |                                   |              |                              |                      |                            |              |                                                                                                            |                                                              |                  |            |
| 1<br>Schroder<br>1994                                                                                          | randomised<br>trial  | very<br>serious | not assessable                    | not serious  | very serious <sup>a, b</sup> | none                 | 21                         | 23           | SMD 0.23 higher<br>(0.36 lower to 0.83 higher)                                                             |                                                              | ⊕○○○<br>Very low | CRITICAL   |
| Ruffilli 2015                                                                                                  | randomised<br>trial  | very<br>serious | not assessable                    | not serious  | very serious <sup>a, c</sup> | none                 | 23                         | 24           | The authors reported no statistically significant difference between the two groups.                       |                                                              | ⊕○○○<br>Very low | CRITICAL   |
| <b>Medication use - medication use Tilidine (better indicated by lower values)</b>                             |                      |                 |                                   |              |                              |                      |                            |              |                                                                                                            |                                                              |                  |            |
| 1<br>Schroder<br>1994                                                                                          | randomised<br>trial  | very<br>serious | not assessable                    | not serious  | very serious <sup>a, b</sup> | none                 | 21                         | 23           | SMD 0.67 lower<br>(1.26 lower to 0.06 lower)                                                               |                                                              | ⊕○○○<br>Very low | CRITICAL   |
| <b>Medication use - medication use Pethidine (better indicated by lower values)</b>                            |                      |                 |                                   |              |                              |                      |                            |              |                                                                                                            |                                                              |                  |            |
| 1<br>Schroder<br>1994                                                                                          | randomised<br>trial  | very<br>serious | not assessable                    | not serious  | very serious <sup>a, b</sup> | none                 | 21                         | 23           | SMD 0.47 lower<br>(1.07 lower to 0.13 higher)                                                              |                                                              | ⊕○○○<br>Very low | CRITICAL   |
| <b>Medication use - medication use Piritramide (better indicated by lower values)</b>                          |                      |                 |                                   |              |                              |                      |                            |              |                                                                                                            |                                                              |                  |            |
| 1<br>Schroder<br>1994                                                                                          | randomised<br>trial  | very<br>serious | not assessable                    | not serious  | very serious <sup>a, b</sup> | none                 | 21                         | 23           | SMD 0.74 lower<br>(1.35 lower to 0.12 lower)                                                               |                                                              | ⊕○○○<br>Very low | CRITICAL   |
| <b>Medication use - medication use Morphine (better indicated by lower values)</b>                             |                      |                 |                                   |              |                              |                      |                            |              |                                                                                                            |                                                              |                  |            |
| Kijkunasathian<br>2017                                                                                         | randomised<br>trial  | serious         | not assessable                    | not serious  | very serious <sup>a, c</sup> | none                 | 19                         | 19           | SDs are not reported. The authors reported no statistically significant difference between the two groups. |                                                              | ⊕○○○<br>Very low | CRITICAL   |
| <b>Medication use – number of patients that discontinued the use of all pain medication at 6 weeks post-op</b> |                      |                 |                                   |              |                              |                      |                            |              |                                                                                                            |                                                              |                  |            |
| 1<br>Waterman<br>2011                                                                                          | randomised<br>trial  | very<br>serious | not assessable                    | not serious  | serious <sup>a</sup>         | none                 | 15/18 (83.3%)              | 5/18 (27.8%) | RR 3.00<br>(1.38 to 6.50)                                                                                  | 556 more<br>per 1,000<br>(from 106<br>more to<br>1,000 more) | ⊕○○○<br>Very low | CRITICAL   |
| <b>Pain</b>                                                                                                    |                      |                 |                                   |              |                              |                      |                            |              |                                                                                                            |                                                              |                  |            |
| 5                                                                                                              |                      |                 |                                   |              |                              |                      |                            |              |                                                                                                            |                                                              |                  |            |
| <b>Pain - VAS scale (better indicated by lower values) – 1 day post-op</b>                                     |                      |                 |                                   |              |                              |                      |                            |              |                                                                                                            |                                                              |                  |            |
| 3<br>Dambros<br>2012<br>Ruffilli 2015<br>Schroder<br>1994                                                      | randomised<br>trials | very<br>serious | not serious<br>I <sup>2</sup> =0% | not serious  | serious <sup>a</sup>         | none                 | 54                         | 56           | SMD 0.84 lower<br>(1.24 lower to 0.45 lower)                                                               |                                                              | ⊕○○○<br>Very low | CRITICAL   |
| Kijkunasathian<br>2017                                                                                         | randomised<br>trial  | very<br>serious | not assessable                    | not serious  | very serious <sup>a, c</sup> | none                 | 19                         | 19           | SDs are not reported. The authors reported no statistically significant difference between the two groups. |                                                              | ⊕○○○<br>Very low | CRITICAL   |
| <b>Pain - VAS scale (better indicated by lower values) – 2 days post-op</b>                                    |                      |                 |                                   |              |                              |                      |                            |              |                                                                                                            |                                                              |                  |            |
| 1<br>Schroder<br>1994                                                                                          | randomised<br>trial  | very<br>serious | not assessable                    | not serious  | very serious <sup>a, b</sup> | none                 | 40                         | 42           | SMD 0.3 lower<br>(0.9 lower to 0.3 higher)                                                                 |                                                              | ⊕○○○<br>Very low | CRITICAL   |

| Certainty assessment                                                                 |                   |              |                         |              |                             |                      | No of patients          |             | Effect                                                                                                     |                   | Certainty        | Importance |
|--------------------------------------------------------------------------------------|-------------------|--------------|-------------------------|--------------|-----------------------------|----------------------|-------------------------|-------------|------------------------------------------------------------------------------------------------------------|-------------------|------------------|------------|
| No of studies                                                                        | Study design      | Risk of bias | Inconsistency           | Indirectness | Imprecision                 | Other considerations | Compressive cryotherapy | Cryotherapy | Relative (95% CI)                                                                                          | Absolute (95% CI) |                  |            |
| Kijkunasathian 2017                                                                  | randomised trial  | very serious | not assessable          | not serious  | very serious <sup>a,c</sup> | none                 | 19                      | 19          | SDs are not reported. The authors reported no statistically significant difference between the two groups. |                   | ⊕○○○<br>Very low | CRITICAL   |
| <b>Pain - VAS scale (better indicated by lower values) – 3 days post-op</b>          |                   |              |                         |              |                             |                      |                         |             |                                                                                                            |                   |                  |            |
| 1 Schroder 1994                                                                      | randomised trial  | very serious | not assessable          | not serious  | very serious <sup>a,b</sup> | none                 | 21                      | 23          | SMD 0.35 lower (0.95 lower to 0.24 higher)                                                                 |                   | ⊕○○○<br>Very low | CRITICAL   |
| <b>Pain - VAS scale (better indicated by lower values) – 1 week post-op</b>          |                   |              |                         |              |                             |                      |                         |             |                                                                                                            |                   |                  |            |
| 2 Schroder 1994<br>Waterman 2011                                                     | randomised trials | very serious | very serious $I^2=81\%$ | not serious  | very serious <sup>a,b</sup> | none                 | 39                      | 41          | SMD 0.23 lower (1.26 lower to 0.8 higher)                                                                  |                   | ⊕○○○<br>Very low | CRITICAL   |
| <b>Pain - VAS scale (better indicated by lower values) – 2 weeks post-op</b>         |                   |              |                         |              |                             |                      |                         |             |                                                                                                            |                   |                  |            |
| 2 Schroder 1994<br>Waterman 2011                                                     | randomised trials | very serious | not serious $I^2=0\%$   | not serious  | serious <sup>a</sup>        | none                 | 39                      | 41          | SMD 0.11 lower (0.55 lower to 0.33 higher)                                                                 |                   | ⊕○○○<br>Very low | CRITICAL   |
| <b>Pain - VAS scale (better indicated by lower values) – 4-6 weeks post-op</b>       |                   |              |                         |              |                             |                      |                         |             |                                                                                                            |                   |                  |            |
| 2 Schroder 1994<br>Waterman 2011                                                     | randomised trials | very serious | not serious $I^2=3\%$   | not serious  | serious <sup>a</sup>        | none                 | 39                      | 41          | SMD 0.31 lower (0.76 lower to 0.14 higher)                                                                 |                   | ⊕○○○<br>Very low | CRITICAL   |
| <b>Range of motion (ROM)</b>                                                         |                   |              |                         |              |                             |                      |                         |             |                                                                                                            |                   |                  |            |
| 4                                                                                    |                   |              |                         |              |                             |                      |                         |             |                                                                                                            |                   |                  |            |
| <b>ROM - flexion (better indicated by higher values) – 1-2 days post-op</b>          |                   |              |                         |              |                             |                      |                         |             |                                                                                                            |                   |                  |            |
| 4 Dambros 2012<br>Kijkunasathian 2017<br>Ruffilli 2015<br>Schroder 1994              | randomised trials | very serious | very serious $I^2=84\%$ | not serious  | very serious <sup>a,b</sup> | none                 | 73                      | 75          | SMD 0.59 higher (0.28 lower to 1.46 higher)                                                                |                   | ⊕○○○<br>Very low | CRITICAL   |
| <b>ROM - flexion (better indicated by higher values) – 1 week post-op</b>            |                   |              |                         |              |                             |                      |                         |             |                                                                                                            |                   |                  |            |
| 1 Schroder 1994                                                                      | randomised trial  | very serious | not assessable          | not serious  | very serious <sup>a,b</sup> | none                 | 21                      | 23          | SMD 1.36 higher (0.7 higher to 2.03 higher)                                                                |                   | ⊕○○○<br>Very low | CRITICAL   |
| <b>ROM - flexion (better indicated by higher values) – 2 weeks post-op</b>           |                   |              |                         |              |                             |                      |                         |             |                                                                                                            |                   |                  |            |
| 1 Schroder 1994                                                                      | randomised trial  | very serious | not assessable          | not serious  | very serious <sup>a,b</sup> | none                 | 21                      | 23          | SMD 0.76 higher (0.14 higher to 1.37 higher)                                                               |                   | ⊕○○○<br>Very low | CRITICAL   |
| <b>ROM - flexion (better indicated by higher values) – 1 month post-op</b>           |                   |              |                         |              |                             |                      |                         |             |                                                                                                            |                   |                  |            |
| 1 Schroder 1994                                                                      | randomised trial  | very serious | not assessable          | not serious  | very serious <sup>a,b</sup> | none                 | 21                      | 23          | SMD 0.96 higher (0.33 higher to 1.59 higher)                                                               |                   | ⊕○○○<br>Very low | CRITICAL   |
| <b>ROM - extension deficit (better indicated by lower values) – 1-2 days post-op</b> |                   |              |                         |              |                             |                      |                         |             |                                                                                                            |                   |                  |            |
| 2 Dambros 2012<br>Schroder 1994                                                      | randomised trials | very serious | not serious $I^2=0\%$   | not serious  | serious <sup>a</sup>        | none                 | 31                      | 32          | SMD 0.10 higher (0.39 lower to 0.60 higher)                                                                |                   | ⊕○○○<br>Very low | CRITICAL   |
| <b>ROM - extension deficit (better indicated by lower values) – 3 days post-op</b>   |                   |              |                         |              |                             |                      |                         |             |                                                                                                            |                   |                  |            |
| 1 Schroder 1994                                                                      | randomised trial  | very serious | not assessable          | not serious  | very serious <sup>a,b</sup> | none                 | 21                      | 23          | SMD 0.2 lower (0.79 lower to 0.40 higher)                                                                  |                   | ⊕○○○<br>Very low | CRITICAL   |
| <b>ROM - extension deficit (better indicated by lower values) – 6 days post-op</b>   |                   |              |                         |              |                             |                      |                         |             |                                                                                                            |                   |                  |            |
| 1 Schroder 1994                                                                      | randomised trial  | very serious | not assessable          | not serious  | very serious <sup>a,b</sup> | none                 | 21                      | 23          | SMD 0.27 lower (0.87 lower to 0.32 higher)                                                                 |                   | ⊕○○○<br>Very low | CRITICAL   |

| Certainty assessment                                                                        |                      |                 |                                        |                |                                |                      | No of patients          |              | Effect                                                                                                     |                                                            | Certainty        | Importance |
|---------------------------------------------------------------------------------------------|----------------------|-----------------|----------------------------------------|----------------|--------------------------------|----------------------|-------------------------|--------------|------------------------------------------------------------------------------------------------------------|------------------------------------------------------------|------------------|------------|
| No of studies                                                                               | Study design         | Risk of bias    | Inconsistency                          | Indirectness   | Imprecision                    | Other considerations | Compressive cryotherapy | Cryotherapy  | Relative (95% CI)                                                                                          | Absolute (95% CI)                                          |                  |            |
| <b>ROM - extension deficit (better indicated by lower values) – 2 weeks post-op</b>         |                      |                 |                                        |                |                                |                      |                         |              |                                                                                                            |                                                            |                  |            |
| 1<br>Schroder<br>1994                                                                       | randomised<br>trial  | very<br>serious | not<br>assessable                      | not<br>serious | very<br>serious <sup>a,b</sup> | none                 | 21                      | 23           | SMD 0.42 lower<br>(1.01 lower to 0.18 higher)                                                              |                                                            | ⊕○○○<br>Very low | CRITICAL   |
| <b>ROM - extension deficit (better indicated by lower values) – 1 month post-op</b>         |                      |                 |                                        |                |                                |                      |                         |              |                                                                                                            |                                                            |                  |            |
| 1<br>Schroder<br>1994                                                                       | randomised<br>trial  | very<br>serious | not<br>assessable                      | not<br>serious | very<br>serious <sup>a,b</sup> | none                 | 21                      | 23           | SMD 1.09 lower<br>(1.73 lower to 0.45 lower)                                                               |                                                            | ⊕○○○<br>Very low | CRITICAL   |
| <b>ROM – patients with limited extension – 2 days post-op</b>                               |                      |                 |                                        |                |                                |                      |                         |              |                                                                                                            |                                                            |                  |            |
| 1<br>Kijkunasathian<br>2017                                                                 | randomised<br>trial  | serious         | not<br>assessable                      | not<br>serious | very<br>serious <sup>a,d</sup> | none                 | 4/19 (21.0%)            | 6/19 (31.0%) | RR 0.68<br>(0.42 to<br>1.09)                                                                               | 99 fewer<br>per 1,000<br>(from 180<br>fewer to 28<br>more) | ⊕○○○<br>Very low | CRITICAL   |
| <b>Swelling</b>                                                                             |                      |                 |                                        |                |                                |                      |                         |              |                                                                                                            |                                                            |                  |            |
| 4                                                                                           |                      |                 |                                        |                |                                |                      |                         |              |                                                                                                            |                                                            |                  |            |
| <b>Swelling - knee circumference (better indicated by lower values) – 1 day post-op</b>     |                      |                 |                                        |                |                                |                      |                         |              |                                                                                                            |                                                            |                  |            |
| 2<br>Ruffilli 2015<br>Schroder<br>1994                                                      | randomised<br>trials | very<br>serious | serious<br>I <sup>2</sup> =54%         | not<br>serious | very<br>serious <sup>a,b</sup> | none                 | 44                      | 47           | SMD 0.28 lower<br>(0.89 lower to 0.34 higher)                                                              |                                                            | ⊕○○○<br>Very low | CRITICAL   |
| <b>Swelling - knee circumference (better indicated by lower values) – 2 days post-op</b>    |                      |                 |                                        |                |                                |                      |                         |              |                                                                                                            |                                                            |                  |            |
| 2<br>Kijkunasathian<br>2017<br>Schroder<br>1994                                             | randomised<br>trials | very<br>serious | serious<br>I <sup>2</sup> =50%         | not<br>serious | very<br>serious <sup>a,b</sup> | none                 | 40                      | 42           | SMD 0.21 higher<br>(0.41 lower to 0.83 higher)                                                             |                                                            | ⊕○○○<br>Very low | CRITICAL   |
| <b>Swelling - knee circumference (better indicated by lower values) – 3 days post-op</b>    |                      |                 |                                        |                |                                |                      |                         |              |                                                                                                            |                                                            |                  |            |
| 1<br>Schroder<br>1994                                                                       | randomised<br>trial  | very<br>serious | not<br>assessable                      | not<br>serious | very<br>serious <sup>a,b</sup> | none                 | 21                      | 23           | SMD 0.18 lower<br>(0.78 lower to 0.41 higher)                                                              |                                                            | ⊕○○○<br>Very low | CRITICAL   |
| <b>Swelling - knee circumference (better indicated by lower values) – 1 week post-op</b>    |                      |                 |                                        |                |                                |                      |                         |              |                                                                                                            |                                                            |                  |            |
| 1<br>Schroder<br>1994                                                                       | randomised<br>trial  | very<br>serious | not<br>assessable                      | not<br>serious | very<br>serious <sup>a,b</sup> | none                 | 21                      | 23           | SMD 0.57 lower<br>(1.18 lower to 0.03 higher)                                                              |                                                            | ⊕○○○<br>Very low | CRITICAL   |
| Waterman<br>2011                                                                            | randomised<br>trial  | very<br>serious | not<br>assessable                      | not<br>serious | very<br>serious <sup>a,c</sup> | none                 | 18                      | 18           | SDs are not reported. The authors reported no statistically significant difference between the two groups. |                                                            | ⊕○○○<br>Very low | CRITICAL   |
| <b>Swelling - knee circumference (better indicated by lower values) – 2 weeks post-op</b>   |                      |                 |                                        |                |                                |                      |                         |              |                                                                                                            |                                                            |                  |            |
| 1<br>Schroder<br>1994                                                                       | randomised<br>trial  | very<br>serious | not<br>assessable                      | not<br>serious | very<br>serious <sup>a,b</sup> | none                 | 21                      | 23           | SMD 0.3 lower<br>(0.9 lower to 0.29 higher)                                                                |                                                            | ⊕○○○<br>Very low | CRITICAL   |
| Waterman<br>2011                                                                            | randomised<br>trial  | very<br>serious | not<br>assessable                      | not<br>serious | very<br>serious <sup>a,c</sup> | none                 | 18                      | 18           | SDs are not reported. The authors reported no statistically significant difference between the two groups. |                                                            | ⊕○○○<br>Very low | CRITICAL   |
| <b>Swelling - knee circumference (better indicated by lower values) – 4-6 weeks post-op</b> |                      |                 |                                        |                |                                |                      |                         |              |                                                                                                            |                                                            |                  |            |
| 1<br>Schroder<br>1994                                                                       | randomised<br>trial  | very<br>serious | not<br>assessable                      | not<br>serious | very<br>serious <sup>a,b</sup> | none                 | 21                      | 23           | SMD 0.34 lower<br>(0.94 lower to 0.25 higher)                                                              |                                                            | ⊕○○○<br>Very low | CRITICAL   |
| Waterman<br>2011                                                                            | randomised<br>trial  | very<br>serious | not<br>assessable                      | not<br>serious | very<br>serious <sup>a,c</sup> | none                 | 18                      | 18           | SDs are not reported. The authors reported no statistically significant difference between the two groups. |                                                            | ⊕○○○<br>Very low | CRITICAL   |
| <b>Swelling - drainage volume (better indicated by lower values)</b>                        |                      |                 |                                        |                |                                |                      |                         |              |                                                                                                            |                                                            |                  |            |
| 2<br>Ruffilli 2015<br>Schroder<br>1994                                                      | randomised<br>trials | very<br>serious | very<br>serious<br>I <sup>2</sup> =81% | not<br>serious | very<br>serious <sup>a,b</sup> | none                 | 44                      | 47           | SMD 0.66 lower<br>(1.66 lower to 0.34 higher)                                                              |                                                            | ⊕○○○<br>Very low | CRITICAL   |
| <b>Patient reported outcome measures (PROM)</b>                                             |                      |                 |                                        |                |                                |                      |                         |              |                                                                                                            |                                                            |                  |            |

| Certainty assessment                                                                                                              |                  |                  |                |                |                      |                             | No of patients          |                 | Effect                                                                                                                                                                                                                                                                                                                                                                                                                                                           |                                                      | Certainty        | Importance |
|-----------------------------------------------------------------------------------------------------------------------------------|------------------|------------------|----------------|----------------|----------------------|-----------------------------|-------------------------|-----------------|------------------------------------------------------------------------------------------------------------------------------------------------------------------------------------------------------------------------------------------------------------------------------------------------------------------------------------------------------------------------------------------------------------------------------------------------------------------|------------------------------------------------------|------------------|------------|
| No of studies                                                                                                                     | Study design     | Risk of bias     | Inconsistency  | Indirectness   | Imprecision          | Other considerations        | Compressive cryotherapy | Cryotherapy     | Relative (95% CI)                                                                                                                                                                                                                                                                                                                                                                                                                                                | Absolute (95% CI)                                    |                  |            |
| 3                                                                                                                                 |                  |                  |                |                |                      |                             |                         |                 |                                                                                                                                                                                                                                                                                                                                                                                                                                                                  |                                                      |                  |            |
| <b>PROM - SF-36 score (better indicated by higher values) – 1 week post-op</b>                                                    |                  |                  |                |                |                      |                             |                         |                 |                                                                                                                                                                                                                                                                                                                                                                                                                                                                  |                                                      |                  |            |
| 1                                                                                                                                 | Waterman 2011    | randomised trial | very serious   | not assessable | not serious          | very serious <sup>a,b</sup> | none                    | 18              | 18                                                                                                                                                                                                                                                                                                                                                                                                                                                               | SMD 0.09 higher<br>(0.56 lower to 0.75 higher)       | ⊕○○○<br>Very low | CRITICAL   |
| <b>PROM - Lysholm score (better indicated by higher values) – 1 week post-op</b>                                                  |                  |                  |                |                |                      |                             |                         |                 |                                                                                                                                                                                                                                                                                                                                                                                                                                                                  |                                                      |                  |            |
| 1                                                                                                                                 | Waterman 2011    | randomised trial | very serious   | not assessable | not serious          | very serious <sup>a,b</sup> | none                    | 18              | 18                                                                                                                                                                                                                                                                                                                                                                                                                                                               | SMD 0.53 lower<br>(1.2 lower to 0.14 higher)         | ⊕○○○<br>Very low | CRITICAL   |
| <b>PROM - SF-36 score (better indicated by higher values) – 2 weeks post-op</b>                                                   |                  |                  |                |                |                      |                             |                         |                 |                                                                                                                                                                                                                                                                                                                                                                                                                                                                  |                                                      |                  |            |
| 1                                                                                                                                 | Waterman 2011    | randomised trial | very serious   | not assessable | not serious          | very serious <sup>a,b</sup> | none                    | 18              | 18                                                                                                                                                                                                                                                                                                                                                                                                                                                               | SMD 0.01 lower<br>(0.67 lower to 0.64 higher)        | ⊕○○○<br>Very low | CRITICAL   |
| <b>PROM - Lysholm score (better indicated by higher values) – 2 weeks post-op</b>                                                 |                  |                  |                |                |                      |                             |                         |                 |                                                                                                                                                                                                                                                                                                                                                                                                                                                                  |                                                      |                  |            |
| 1                                                                                                                                 | Waterman 2011    | randomised trial | very serious   | not assessable | not serious          | very serious <sup>a,b</sup> | none                    | 18              | 18                                                                                                                                                                                                                                                                                                                                                                                                                                                               | SMD 0.09 lower<br>(0.74 lower to 0.56 higher)        | ⊕○○○<br>Very low | CRITICAL   |
| <b>PROM - SF-36 score (better indicated by higher values) – 6 weeks post-op</b>                                                   |                  |                  |                |                |                      |                             |                         |                 |                                                                                                                                                                                                                                                                                                                                                                                                                                                                  |                                                      |                  |            |
| 1                                                                                                                                 | Waterman 2011    | randomised trial | very serious   | not assessable | not serious          | very serious <sup>a,b</sup> | none                    | 18              | 18                                                                                                                                                                                                                                                                                                                                                                                                                                                               | SMD 0.1 higher<br>(0.56 lower to 0.75 higher)        | ⊕○○○<br>Very low | CRITICAL   |
| <b>PROM - Lysholm score (better indicated by higher values) – 6 weeks post-op</b>                                                 |                  |                  |                |                |                      |                             |                         |                 |                                                                                                                                                                                                                                                                                                                                                                                                                                                                  |                                                      |                  |            |
| 1                                                                                                                                 | Waterman 2011    | randomised trial | very serious   | not assessable | not serious          | very serious <sup>a,b</sup> | none                    | 18              | 18                                                                                                                                                                                                                                                                                                                                                                                                                                                               | SMD 0.1 lower<br>(0.75 lower to 0.56 higher)         | ⊕○○○<br>Very low | CRITICAL   |
| <b>PROM - Patient satisfaction – 2 days post-op</b>                                                                               |                  |                  |                |                |                      |                             |                         |                 |                                                                                                                                                                                                                                                                                                                                                                                                                                                                  |                                                      |                  |            |
| Kijkunasathian 2017                                                                                                               | randomised trial | very serious     | not assessable | not serious    | serious <sup>a</sup> | none                        | 7/19<br>(36.8%)         | 19/19<br>(100%) | RR 0.38<br>(0.22 to 0.68)                                                                                                                                                                                                                                                                                                                                                                                                                                        | 620 fewer per 1,000<br>(from 780 fewer to 320 fewer) | ⊕○○○<br>Very low | CRITICAL   |
| Ruffilli 2015                                                                                                                     | randomised trial | very serious     | not assessable | not serious    | serious <sup>a</sup> | none                        | 23                      | 24              | The subjective evaluation of the Hilotherm was generally positive. Nine patients (39 %) considered the device very comfortable, 13 (57 %) rated the device quite comfortable, and only one (4 %) patient complained about the lack of comfort. Five patients (22 %) found Hilotherm very useful, 13 cases (57 %) had positive opinions ("quite satisfying"), three (13 %) patients were quite dissatisfied, and two (9 %) patients were completely dissatisfied. |                                                      | ⊕○○○<br>Very low | CRITICAL   |
| <b>Atrophy</b>                                                                                                                    |                  |                  |                |                |                      |                             |                         |                 |                                                                                                                                                                                                                                                                                                                                                                                                                                                                  |                                                      |                  |            |
| 2                                                                                                                                 |                  |                  |                |                |                      |                             |                         |                 |                                                                                                                                                                                                                                                                                                                                                                                                                                                                  |                                                      |                  |            |
| <b>Atrophy - thigh - 10cm proximal to superior patellar pole circumference (better indicated by lower values) – 1 day post-op</b> |                  |                  |                |                |                      |                             |                         |                 |                                                                                                                                                                                                                                                                                                                                                                                                                                                                  |                                                      |                  |            |
| 1                                                                                                                                 | Ruffilli 2015    | randomised trial | very serious   | not assessable | not serious          | very serious <sup>a,b</sup> | none                    | 23              | 24                                                                                                                                                                                                                                                                                                                                                                                                                                                               | SMD 0.21 lower<br>(0.78 lower to 0.37 higher)        | ⊕○○○<br>Very low | IMPORTANT  |
| <b>Atrophy - calf - girth difference - at maximum girth of calf (better indicated by higher values) – 2 days post-op</b>          |                  |                  |                |                |                      |                             |                         |                 |                                                                                                                                                                                                                                                                                                                                                                                                                                                                  |                                                      |                  |            |
| 1                                                                                                                                 | Schroder 1994    | randomised trial | very serious   | not assessable | not serious          | very serious <sup>a,b</sup> | none                    | 21              | 23                                                                                                                                                                                                                                                                                                                                                                                                                                                               | SMD 0.99 higher<br>(0.36 higher to 1.62 higher)      | ⊕○○○<br>Very low | IMPORTANT  |
| <b>Atrophy - calf - girth difference - at maximum girth of calf (better indicated by higher values) – 3 days post-op</b>          |                  |                  |                |                |                      |                             |                         |                 |                                                                                                                                                                                                                                                                                                                                                                                                                                                                  |                                                      |                  |            |
| 1                                                                                                                                 | Schroder 1994    | randomised trial | very serious   | not assessable | not serious          | very serious <sup>a,b</sup> | none                    | 21              | 23                                                                                                                                                                                                                                                                                                                                                                                                                                                               | SMD 1.05 higher<br>(0.41 higher to 1.68 higher)      | ⊕○○○<br>Very low | IMPORTANT  |
| <b>Atrophy - calf - girth difference - at maximum girth of calf (better indicated by higher values) – 6 days post-op</b>          |                  |                  |                |                |                      |                             |                         |                 |                                                                                                                                                                                                                                                                                                                                                                                                                                                                  |                                                      |                  |            |

| Certainty assessment                                                                                                      |                     |                 |                |              |                             |                      | № of patients           |                  | Effect                                          |                                                               | Certainty        | Importance |
|---------------------------------------------------------------------------------------------------------------------------|---------------------|-----------------|----------------|--------------|-----------------------------|----------------------|-------------------------|------------------|-------------------------------------------------|---------------------------------------------------------------|------------------|------------|
| № of studies                                                                                                              | Study design        | Risk of bias    | Inconsistency  | Indirectness | Imprecision                 | Other considerations | Compressive cryotherapy | Cryotherapy      | Relative (95% CI)                               | Absolute (95% CI)                                             |                  |            |
| 1<br>Schroder<br>1994                                                                                                     | randomised<br>trial | very<br>serious | not assessable | not serious  | very serious <sup>a,b</sup> | none                 | 21                      | 23               | SMD 0.53 higher<br>(0.07 lower to 1.13 higher)  |                                                               | ⊕○○○<br>Very low | IMPORTANT  |
| <b>Atrophy - calf - girth difference - at maximum girth of calf (better indicated by higher values) – 2 weeks post-op</b> |                     |                 |                |              |                             |                      |                         |                  |                                                 |                                                               |                  |            |
| 1<br>Schroder<br>1994                                                                                                     | randomised<br>trial | very<br>serious | not assessable | not serious  | very serious <sup>a,b</sup> | none                 | 21                      | 23               | SMD 0.66 higher<br>(0.05 higher to 1.27 higher) |                                                               | ⊕○○○<br>Very low | IMPORTANT  |
| <b>Atrophy - calf - girth difference - at maximum girth of calf (better indicated by higher values) – 4 weeks post-op</b> |                     |                 |                |              |                             |                      |                         |                  |                                                 |                                                               |                  |            |
| 1<br>Schroder<br>1994                                                                                                     | randomised<br>trial | very<br>serious | not assessable | not serious  | very serious <sup>a,b</sup> | none                 | 21                      | 23               | SMD 0.97 higher<br>(0.34 higher to 1.6 higher)  |                                                               | ⊕○○○<br>Very low | IMPORTANT  |
| <b>Strength</b>                                                                                                           |                     |                 |                |              |                             |                      |                         |                  |                                                 |                                                               |                  |            |
| 1                                                                                                                         |                     |                 |                |              |                             |                      |                         |                  |                                                 |                                                               |                  |            |
| <b>Strength - Quadriceps CON 60°/s (better indicated by higher values) – 3 months post-op</b>                             |                     |                 |                |              |                             |                      |                         |                  |                                                 |                                                               |                  |            |
| 1<br>Schroder<br>1994                                                                                                     | randomised<br>trial | very<br>serious | not assessable | not serious  | very serious <sup>a,b</sup> | none                 | 21                      | 23               | SMD 0.09 lower<br>(0.69 lower to 0.50 higher)   |                                                               | ⊕○○○<br>Very low | IMPORTANT  |
| <b>Strength - Hamstring CON 60°/s (better indicated by higher values) – 3 months post-op</b>                              |                     |                 |                |              |                             |                      |                         |                  |                                                 |                                                               |                  |            |
| 1<br>Schroder<br>1994                                                                                                     | randomised<br>trial | very<br>serious | not assessable | not serious  | very serious <sup>a,b</sup> | none                 | 21                      | 23               | SMD 0.07 lower<br>(0.66 lower to 0.52 higher)   |                                                               | ⊕○○○<br>Very low | IMPORTANT  |
| <b>Functional activities</b>                                                                                              |                     |                 |                |              |                             |                      |                         |                  |                                                 |                                                               |                  |            |
| 1                                                                                                                         |                     |                 |                |              |                             |                      |                         |                  |                                                 |                                                               |                  |            |
| <b>Number of patients able to perform active quads contraction for 5 sec and repeat 3 times – 2 days post-op</b>          |                     |                 |                |              |                             |                      |                         |                  |                                                 |                                                               |                  |            |
| 1<br>Kijkunasathian<br>2017                                                                                               | randomised<br>trial | serious         | not assessable | not serious  | serious <sup>a</sup>        | none                 | 8/19<br>(45.0%)         | 18/19<br>(95.0%) | RR 0.47<br>(0.38 to<br>0.59)                    | 503 fewer<br>per 1,000<br>(from 589<br>fewer to 390<br>fewer) | ⊕⊕○○<br>Low      | IMPORTANT  |
| <b>Number of patients able to perform active straight leg test and hold for 5 sec – 2 days post-op</b>                    |                     |                 |                |              |                             |                      |                         |                  |                                                 |                                                               |                  |            |
| 1<br>Kijkunasathian<br>2017                                                                                               | randomised<br>trial | serious         | not assessable | not serious  | serious <sup>a</sup>        | none                 | 6/19<br>(30.0%)         | 10/19<br>(55.0%) | OR 0.35<br>(0.20 to<br>0.63)                    | 250 fewer<br>per 1,000<br>(from 354<br>fewer to 115<br>fewer) | ⊕⊕○○<br>Low      | IMPORTANT  |
| <b>Adverse events</b>                                                                                                     |                     |                 |                |              |                             |                      |                         |                  |                                                 |                                                               |                  |            |
| Schroder<br>1994                                                                                                          |                     |                 |                |              |                             |                      |                         |                  | None reported                                   |                                                               |                  | CRITICAL   |
| Waterman<br>2011                                                                                                          |                     |                 |                |              |                             |                      |                         |                  | None reported                                   |                                                               |                  | CRITICAL   |
| Dambros<br>2012                                                                                                           |                     |                 |                |              |                             |                      |                         |                  | None reported                                   |                                                               |                  | CRITICAL   |
| Ruffilli 2015                                                                                                             |                     |                 |                |              |                             |                      |                         |                  | None reported                                   |                                                               |                  | CRITICAL   |
| Kijkunasathian<br>2017                                                                                                    |                     |                 |                |              |                             |                      |                         |                  | None reported                                   |                                                               |                  | CRITICAL   |

CI: confidence interval; SMD: standardised mean difference; RR: risk ratio

- Total participants <800
- 95% CI of an SMD extends > 0.5 points in either direction
- Not reporting results or SDs
- 95% CI boundaries cross the arbitrary thresholds of 0.75 and 1.25

## Neuromuscular electrical Stimulation (NMES) versus no NMES in rehabilitation after ACLR

**Bibliography:** Sisk 1987, Delitto 1988, Wigerstad-Lossing 1988, Snyder-Mackler 1991, Snyder-Mackler 1995, Lieber 1996, Paternostro-Sluga 1999, Fitzgerald 2003, Hasegawa 2011, Feil 2011, Ediz 2012, Taradaj 2013, Wright 2019, Toth 2020

| Certainty assessment                                                                                |                   |              |                                    |              |                              |                      | No of patients |         | Effect                                                                                                                                                                                   |                   | Certainty        | Importance |
|-----------------------------------------------------------------------------------------------------|-------------------|--------------|------------------------------------|--------------|------------------------------|----------------------|----------------|---------|------------------------------------------------------------------------------------------------------------------------------------------------------------------------------------------|-------------------|------------------|------------|
| No of studies                                                                                       | Study design      | Risk of bias | Inconsistency                      | Indirectness | Imprecision                  | Other considerations | NMES           | no NMES | Relative (95% CI)                                                                                                                                                                        | Absolute (95% CI) |                  |            |
| <b>Strength - quadriceps</b>                                                                        |                   |              |                                    |              |                              |                      |                |         |                                                                                                                                                                                          |                   |                  |            |
| 13                                                                                                  |                   |              |                                    |              |                              |                      |                |         |                                                                                                                                                                                          |                   |                  |            |
| <b>Strength - Quadriceps ISOM 30-90° (better indicated by higher values) – 4-7 weeks post-op</b>    |                   |              |                                    |              |                              |                      |                |         |                                                                                                                                                                                          |                   |                  |            |
| 5<br>Delitto 1988<br>Wigerstad-Lossing 1988<br>Hasegawa 2011<br>Sisk 1987<br>Paternostro-Sluga 1999 | randomised trials | very serious | serious<br>I <sup>2</sup> =51%     | not serious  | very serious <sup>a, b</sup> | none                 | 59             | 56      | SMD 0.67 higher<br>(0.11 higher to 1.23 higher)                                                                                                                                          |                   | ⊕○○○<br>Very low | CRITICAL   |
| <b>Strength - Quadriceps ISOM 45-90° (better indicated by higher values) – 2-3 months post-op</b>   |                   |              |                                    |              |                              |                      |                |         |                                                                                                                                                                                          |                   |                  |            |
| 5<br>Fitzgerald 2003<br>Hasegawa 2011<br>Lieber 1996<br>Paternostro-Sluga 1999<br>Sisk 1987         | randomised trials | very serious | not serious<br>I <sup>2</sup> =0%  | not serious  | serious <sup>a</sup>         | none                 | 78             | 80      | SMD 0.25 higher<br>(0.06 lower to 0.56 higher)                                                                                                                                           |                   | ⊕○○○<br>Very low | CRITICAL   |
| <b>Strength - Quadriceps ISOM 45-90° (better indicated by higher values) – &gt;6 months post-op</b> |                   |              |                                    |              |                              |                      |                |         |                                                                                                                                                                                          |                   |                  |            |
| 3<br>Lieber 1996<br>Paternostro-Sluga 1999<br>Toth 2020                                             | randomised trials | very serious | not serious<br>I <sup>2</sup> =0%  | not serious  | serious <sup>a</sup>         | none                 | 45             | 44      | SMD 0.03 higher<br>(0.38 lower to 0.45 higher)                                                                                                                                           |                   | ⊕○○○<br>Very low | CRITICAL   |
| Taradaj 2013                                                                                        | randomised trial  | not serious  | not assessable                     | not serious  | very serious <sup>a, c</sup> | none                 | 40             | 40      | No SDs are reported. Authors reported a significant difference in favour of the intervention (p=0.002)                                                                                   |                   | ⊕⊕○○<br>Low      | CRITICAL   |
| <b>Strength - Quadriceps CON 60-90°/s (better indicated by higher values) – 1-2 months post-op</b>  |                   |              |                                    |              |                              |                      |                |         |                                                                                                                                                                                          |                   |                  |            |
| 4<br>Feil 2011<br>Hasegawa 2011<br>Paternostro-Sluga 1999<br>Snyder-Mackler 1991                    | randomised trials | serious      | not serious<br>I <sup>2</sup> =35% | not serious  | serious <sup>a</sup>         | none                 | 64             | 66      | SMD 0.51 higher<br>(0.03 higher to 1 higher)                                                                                                                                             |                   | ⊕⊕○○<br>Low      | CRITICAL   |
| Snyder-Mackler 1995                                                                                 | randomised trial  | very serious | not assessable                     | not serious  | very serious <sup>a, c</sup> | none                 | 31             | 34      | No SDs are reported. Authors reported at least 70% recovery of the quadriceps by six weeks after the operation with the addition of high-intensity neuromuscular electrical stimulation. |                   | ⊕○○○<br>Very low | CRITICAL   |
| <b>Strength - Quadriceps CON 180-210°/s (better indicated by higher values) – 2 months post-op</b>  |                   |              |                                    |              |                              |                      |                |         |                                                                                                                                                                                          |                   |                  |            |
| 2<br>Feil 2011<br>Snyder-Mackler 1991                                                               | randomised trials | serious      | serious<br>I <sup>2</sup> =73%     | not serious  | very serious <sup>a, b</sup> | none                 | 38             | 39      | SMD 1.50 higher<br>(0.41 higher to 3.40 higher)                                                                                                                                          |                   | ⊕○○○<br>Very low | CRITICAL   |
| <b>Strength - Quadriceps CON 60°/s (better indicated by higher values) – 3 months post-op</b>       |                   |              |                                    |              |                              |                      |                |         |                                                                                                                                                                                          |                   |                  |            |
| 3<br>Feil 2011<br>Hasegawa 2011<br>Paternostro-Sluga 1999                                           | randomised trials | serious      | not serious<br>I <sup>2</sup> =0%  | not serious  | serious <sup>a</sup>         | none                 | 59             | 61      | SMD 0.5 higher<br>(0.14 higher to 0.87 higher)                                                                                                                                           |                   | ⊕⊕○○<br>Low      | CRITICAL   |
| <b>Strength - Quadriceps CON 180°/s (better indicated by higher values) – 3 months post-op</b>      |                   |              |                                    |              |                              |                      |                |         |                                                                                                                                                                                          |                   |                  |            |

| Certainty assessment                                                                                                  |                   |              |                                     |              |                             |                      | No of patients |         | Effect                                                                                                |                   | Certainty        | Importance |
|-----------------------------------------------------------------------------------------------------------------------|-------------------|--------------|-------------------------------------|--------------|-----------------------------|----------------------|----------------|---------|-------------------------------------------------------------------------------------------------------|-------------------|------------------|------------|
| No of studies                                                                                                         | Study design      | Risk of bias | Inconsistency                       | Indirectness | Imprecision                 | Other considerations | NMES           | no NMES | Relative (95% CI)                                                                                     | Absolute (95% CI) |                  |            |
| 1<br>Feil 2011                                                                                                        | randomised trial  | serious      | not assessable                      | not serious  | serious <sup>a</sup>        | none                 | 33             | 34      | SMD 0.78 higher<br>(0.29 higher to 1.28 higher)                                                       |                   | ⊕⊕○○<br>Low      | CRITICAL   |
| <b>Strength - Quadriceps CON 60°/s (better indicated by higher values) – &gt;6 months post-op</b>                     |                   |              |                                     |              |                             |                      |                |         |                                                                                                       |                   |                  |            |
| 3<br>Feil 2011<br>Paternostro-Sluga 1999<br>Toth 2020                                                                 | randomised trials | very serious | not serious<br>I <sup>2</sup> =0%   | not serious  | serious <sup>a</sup>        | none                 | 58             | 58      | SMD 0.48 higher<br>(0.11 higher to 0.85 higher)                                                       |                   | ⊕○○○<br>Very low | CRITICAL   |
| <b>Strength - Quadriceps CON 180°/s (better indicated by higher values) – 6 months post-op</b>                        |                   |              |                                     |              |                             |                      |                |         |                                                                                                       |                   |                  |            |
| 2<br>Feil 2011<br>Toth 2020                                                                                           | randomised trials | very serious | not serious<br>I <sup>2</sup> =31%  | not serious  | very serious <sup>a,b</sup> | none                 | 42             | 41      | SMD 0.62 higher<br>(0.01 higher to 1.22 higher)                                                       |                   | ⊕○○○<br>Very low | CRITICAL   |
| <b>Strength - hamstring</b>                                                                                           |                   |              |                                     |              |                             |                      |                |         |                                                                                                       |                   |                  |            |
| 3                                                                                                                     |                   |              |                                     |              |                             |                      |                |         |                                                                                                       |                   |                  |            |
| <b>Strength - Hamstring ISOM (better indicated by higher values) – 6 weeks post-op</b>                                |                   |              |                                     |              |                             |                      |                |         |                                                                                                       |                   |                  |            |
| 1<br>DeLitto 1988                                                                                                     | randomised trial  | very serious | not assessable                      | not serious  | very serious <sup>a,b</sup> | none                 | 10             | 10      | SMD 2.79 higher<br>(1.49 higher to 4.09 higher)                                                       |                   | ⊕○○○<br>Very low | CRITICAL   |
| <b>Strength - Hamstring CON (better indicated by higher values) – 6-8 weeks post-op</b>                               |                   |              |                                     |              |                             |                      |                |         |                                                                                                       |                   |                  |            |
| 2<br>Paternostro-Sluga 1999<br>Snyder-Mackler 1991                                                                    | randomised trials | serious      | not serious<br>I <sup>2</sup> =0%   | not serious  | very serious <sup>a,b</sup> | none                 | 21             | 22      | SMD 0.32 higher<br>(0.28 lower to 0.93 higher)                                                        |                   | ⊕○○○<br>Very low | CRITICAL   |
| <b>Strength - Hamstring CON (better indicated by higher values) – 3 months post-op</b>                                |                   |              |                                     |              |                             |                      |                |         |                                                                                                       |                   |                  |            |
| 1<br>Paternostro-Sluga 1999                                                                                           | randomised trial  | serious      | not assessable                      | not serious  | very serious <sup>a,b</sup> | none                 | 16             | 17      | SMD 0.05 higher<br>(0.63 lower to 0.74 higher)                                                        |                   | ⊕○○○<br>Very low | CRITICAL   |
| <b>Strength - Hamstring CON (better indicated by higher values) – 1 year post-op</b>                                  |                   |              |                                     |              |                             |                      |                |         |                                                                                                       |                   |                  |            |
| 1<br>Paternostro-Sluga 1999                                                                                           | randomised trial  | serious      | not assessable                      | not serious  | very serious <sup>a,b</sup> | none                 | 16             | 17      | SMD 0.04 lower<br>(0.73 lower to 0.64 higher)                                                         |                   | ⊕○○○<br>Very low | CRITICAL   |
| <b>Atrophy</b>                                                                                                        |                   |              |                                     |              |                             |                      |                |         |                                                                                                       |                   |                  |            |
| 6                                                                                                                     |                   |              |                                     |              |                             |                      |                |         |                                                                                                       |                   |                  |            |
| <b>Atrophy - Quadriceps cross sectional area (better indicated by higher values) – 3-6 weeks post-op</b>              |                   |              |                                     |              |                             |                      |                |         |                                                                                                       |                   |                  |            |
| 2<br>Toth 2020<br>Wigerstad-Lossing 1988                                                                              | randomised trials | very serious | serious<br>I <sup>2</sup> =75%      | not serious  | very serious <sup>a,b</sup> | none                 | 22             | 17      | SMD 0.19 higher<br>(1.14 lower to 1.52 higher)                                                        |                   | ⊕○○○<br>Very low | CRITICAL   |
| <b>Atrophy - Quadriceps cross sectional area (better indicated by higher values) – 6 months post-op</b>               |                   |              |                                     |              |                             |                      |                |         |                                                                                                       |                   |                  |            |
| 1<br>Toth 2020                                                                                                        | randomised trial  | very serious | not assessable                      | not serious  | very serious <sup>a,b</sup> | none                 | 9              | 7       | SMD 0.43 lower<br>(1.43 lower to 0.57 higher)                                                         |                   | ⊕○○○<br>Very low | CRITICAL   |
| <b>Atrophy - thigh circumference difference between limbs (better indicated by lower values) – 2 months post-op</b>   |                   |              |                                     |              |                             |                      |                |         |                                                                                                       |                   |                  |            |
| 1<br>Ediz 2012                                                                                                        | randomised trial  | serious      | not assessable                      | not serious  | very serious <sup>a,b</sup> | none                 | 13             | 13      | SMD 0.47 lower<br>(1.25 lower to 0.32 higher)                                                         |                   | ⊕○○○<br>Very low | CRITICAL   |
| <b>Atrophy - thigh circumference difference between limbs (better indicated by lower values) – 3 months post-op</b>   |                   |              |                                     |              |                             |                      |                |         |                                                                                                       |                   |                  |            |
| 1<br>Ediz 2012                                                                                                        | randomised trial  | serious      | not assessable                      | not serious  | very serious <sup>a,b</sup> | none                 | 13             | 13      | SMD 0.22 lower<br>(0.99 lower to 0.56 higher)                                                         |                   | ⊕○○○<br>Very low | CRITICAL   |
| <b>Atrophy - thigh circumference difference between limbs (better indicated by lower values) – 5-6 months post-op</b> |                   |              |                                     |              |                             |                      |                |         |                                                                                                       |                   |                  |            |
| 2<br>Wright 2019<br>Ediz 2012                                                                                         | randomised trials | very serious | very serious<br>I <sup>2</sup> =94% | not serious  | very serious <sup>a,b</sup> | none                 | 27             | 24      | SMD 1.20 higher<br>(1.51 lower to 3.90 higher)                                                        |                   | ⊕○○○<br>Very low | CRITICAL   |
| Taradaj 2013                                                                                                          | randomised trial  | not serious  | not assessable                      | not serious  | very serious <sup>a,c</sup> | none                 | 40             | 40      | No SDs are reported. Authors reported a significant difference in favour of the intervention (p=0.04) |                   | ⊕⊕○○<br>Low      | CRITICAL   |
| <b>Atrophy - rectus femoris thickness (mm) using ultrasound (better indicated by higher values) – 4 weeks post-op</b> |                   |              |                                     |              |                             |                      |                |         |                                                                                                       |                   |                  |            |

| Certainty assessment                                                                                                     |                              |                   |               |                                     |             |                              | No of patients |         | Effect            |                                                | Certainty        | Importance |
|--------------------------------------------------------------------------------------------------------------------------|------------------------------|-------------------|---------------|-------------------------------------|-------------|------------------------------|----------------|---------|-------------------|------------------------------------------------|------------------|------------|
| No of studies                                                                                                            | Study design                 | Risk of bias      | Inconsistency | Indirectness                        | Imprecision | Other considerations         | NMES           | no NMES | Relative (95% CI) | Absolute (95% CI)                              |                  |            |
| 1                                                                                                                        | Hasegawa 2011                | randomised trial  | serious       | not assessable                      | not serious | very serious <sup>a, b</sup> | none           | 10      | 10                | SMD 0.69 higher<br>(0.22 lower to 1.6 higher)  | ⊕○○○<br>Very low | CRITICAL   |
| <b>Atrophy - rectus femoris thickness (mm) using ultrasound (better indicated by higher values) – 3 months post-op</b>   |                              |                   |               |                                     |             |                              |                |         |                   |                                                |                  |            |
| 1                                                                                                                        | Hasegawa 2011                | randomised trial  | serious       | not assessable                      | not serious | very serious <sup>a, b</sup> | none           | 10      | 10                | SMD 0.54 higher<br>(0.36 lower to 1.43 higher) | ⊕○○○<br>Very low | CRITICAL   |
| <b>Atrophy - vastus lateralis thickness (mm) using ultrasound (better indicated by higher values) – 4 weeks post-op</b>  |                              |                   |               |                                     |             |                              |                |         |                   |                                                |                  |            |
| 1                                                                                                                        | Hasegawa 2011                | randomised trial  | serious       | not assessable                      | not serious | very serious <sup>a, b</sup> | none           | 10      | 10                | SMD 0.41 higher<br>(0.48 lower to 1.3 higher)  | ⊕○○○<br>Very low | CRITICAL   |
| <b>Atrophy - vastus lateralis thickness (mm) using ultrasound (better indicated by higher values) – 3 months post-op</b> |                              |                   |               |                                     |             |                              |                |         |                   |                                                |                  |            |
| 1                                                                                                                        | Hasegawa 2011                | randomised trial  | serious       | not assessable                      | not serious | very serious <sup>a, b</sup> | none           | 10      | 10                | SMD 0.34 higher<br>(0.55 lower to 1.22 higher) | ⊕○○○<br>Very low | CRITICAL   |
| <b>Pain</b>                                                                                                              |                              |                   |               |                                     |             |                              |                |         |                   |                                                |                  |            |
| 2                                                                                                                        |                              |                   |               |                                     |             |                              |                |         |                   |                                                |                  |            |
| <b>Pain – VAS score (better indicated by lower values) – 2 months post-op</b>                                            |                              |                   |               |                                     |             |                              |                |         |                   |                                                |                  |            |
| 1                                                                                                                        | Ediz 2012                    | randomised trial  | serious       | not assessable                      | not serious | very serious <sup>a, b</sup> | none           | 13      | 13                | SMD 0.79 lower<br>(1.59 lower to 0.01 higher)  | ⊕○○○<br>Very low | CRITICAL   |
| <b>Pain – VAS score (better indicated by lower values) – 3 months post-op</b>                                            |                              |                   |               |                                     |             |                              |                |         |                   |                                                |                  |            |
| 2                                                                                                                        | Ediz 2012<br>Fitzgerald 2003 | randomised trials | very serious  | very serious<br>I <sup>2</sup> =80% | not serious | very serious <sup>a, b</sup> | none           | 34      | 35                | SMD 0.36 lower<br>(1.49 lower to 0.76 higher)  | ⊕○○○<br>Very low | CRITICAL   |
| <b>Pain – VAS score (better indicated by lower values) – 6 months post-op</b>                                            |                              |                   |               |                                     |             |                              |                |         |                   |                                                |                  |            |
| 1                                                                                                                        | Ediz 2012                    | randomised trial  | serious       | not assessable                      | not serious | very serious <sup>a, b</sup> | none           | 13      | 13                | SMD 0.08 higher<br>(0.69 lower to 0.85 higher) | ⊕○○○<br>Very low | CRITICAL   |
| <b>Range of motion (ROM)</b>                                                                                             |                              |                   |               |                                     |             |                              |                |         |                   |                                                |                  |            |
| 2                                                                                                                        |                              |                   |               |                                     |             |                              |                |         |                   |                                                |                  |            |
| <b>ROM - knee flexion (better indicated by higher values) – 6 months post-op</b>                                         |                              |                   |               |                                     |             |                              |                |         |                   |                                                |                  |            |
| 1                                                                                                                        | Toth 2020                    | randomised trial  | very serious  | not assessable                      | not serious | very serious <sup>a, b</sup> | none           | 10      | 8                 | SMD 0<br>(0.93 lower to 0.93 higher)           | ⊕○○○<br>Very low | IMPORTANT  |
| <b>ROM - knee extension deficit (better indicated by lower values) – 2 months post-op</b>                                |                              |                   |               |                                     |             |                              |                |         |                   |                                                |                  |            |
| 1                                                                                                                        | Ediz 2012                    | randomised trial  | serious       | not assessable                      | not serious | very serious <sup>a, b</sup> | none           | 13      | 13                | SMD 0.32 lower<br>(1.09 lower to 0.45 higher)  | ⊕○○○<br>Very low | IMPORTANT  |
| <b>ROM - knee extension deficit (better indicated by lower values) – 3 months post-op</b>                                |                              |                   |               |                                     |             |                              |                |         |                   |                                                |                  |            |
| 1                                                                                                                        | Ediz 2012                    | randomised trial  | serious       | not assessable                      | not serious | very serious <sup>a, b</sup> | none           | 13      | 13                | SMD 0.41 lower<br>(1.19 lower to 0.37 higher)  | ⊕○○○<br>Very low | IMPORTANT  |
| <b>ROM - knee extension (better indicated by lower values) – 6 months post-op</b>                                        |                              |                   |               |                                     |             |                              |                |         |                   |                                                |                  |            |
| 2                                                                                                                        | Toth 2020<br>Ediz 2012       | randomised trials | very serious  | not serious<br>I <sup>2</sup> =0%   | not serious | very serious <sup>a, b</sup> | none           | 23      | 21                | SMD 0.27 lower<br>(0.87 lower to 0.32 higher)  | ⊕○○○<br>Very low | IMPORTANT  |
| <b>Patient reported outcome measures (PROM)</b>                                                                          |                              |                   |               |                                     |             |                              |                |         |                   |                                                |                  |            |
| 5                                                                                                                        |                              |                   |               |                                     |             |                              |                |         |                   |                                                |                  |            |
| <b>PROM - Lysholm scale (better indicated by higher values) – 3 months post-op</b>                                       |                              |                   |               |                                     |             |                              |                |         |                   |                                                |                  |            |
| 1                                                                                                                        | Feil 2011                    | randomised trial  | very serious  | not assessable                      | not serious | serious <sup>a</sup>         | none           | 33      | 34                | SMD 0.19 higher<br>(0.29 lower to 0.67 higher) | ⊕○○○<br>Very low | CRITICAL   |
| <b>PROM - IKDC scale (better indicated by higher values) – 3 months post-op</b>                                          |                              |                   |               |                                     |             |                              |                |         |                   |                                                |                  |            |
| 1                                                                                                                        | Ediz 2012                    | randomised trial  | very serious  | not assessable                      | not serious | very serious <sup>a, b</sup> | none           | 13      | 13                | SMD 0.66 higher<br>(0.14 lower to 1.45 higher) | ⊕○○○<br>Very low | CRITICAL   |
| <b>PROM - Activity of daily living (better indicated by higher values) – 4 months post-op</b>                            |                              |                   |               |                                     |             |                              |                |         |                   |                                                |                  |            |

| Certainty assessment                                                                                  |                   |              |                                   |              |                              |                      | No of patients |         | Effect                                                                               |                   | Certainty        | Importance |
|-------------------------------------------------------------------------------------------------------|-------------------|--------------|-----------------------------------|--------------|------------------------------|----------------------|----------------|---------|--------------------------------------------------------------------------------------|-------------------|------------------|------------|
| No of studies                                                                                         | Study design      | Risk of bias | Inconsistency                     | Indirectness | Imprecision                  | Other considerations | NMES           | no NMES | Relative (95% CI)                                                                    | Absolute (95% CI) |                  |            |
| 1<br>Fitzgerald 2003                                                                                  | randomised trial  | very serious | not assessable                    | not serious  | very serious <sup>a, b</sup> | none                 | 21             | 22      | SMD 0.64 higher<br>(0.03 higher to 1.26 higher)                                      |                   | ⊕○○○<br>Very low | CRITICAL   |
| <b>PROM - Lysholm scale (better indicated by higher values) – 6 months post-op</b>                    |                   |              |                                   |              |                              |                      |                |         |                                                                                      |                   |                  |            |
| 2<br>Feil 2011<br>Hasegawa 2011                                                                       | randomised trials | very serious | not serious<br>I <sup>2</sup> =0% | not serious  | serious <sup>a</sup>         | none                 | 43             | 44      | SMD 0.24 higher<br>(0.18 lower to 0.66 higher)                                       |                   | ⊕○○○<br>Very low | CRITICAL   |
| <b>PROM - KOOS Symptoms (better indicated by higher values) – 6 months post-op</b>                    |                   |              |                                   |              |                              |                      |                |         |                                                                                      |                   |                  |            |
| 1<br>Toth 2020                                                                                        | randomised trial  | very serious | not assessable                    | not serious  | very serious <sup>a, b</sup> | none                 | 10             | 8       | SMD 0.17 lower<br>(1.11 lower to 0.76 higher)                                        |                   | ⊕○○○<br>Very low | CRITICAL   |
| <b>PROM - KOOS stiffness (better indicated by higher values) – 6 months post-op</b>                   |                   |              |                                   |              |                              |                      |                |         |                                                                                      |                   |                  |            |
| 1<br>Toth 2020                                                                                        | randomised trial  | very serious | not assessable                    | not serious  | very serious <sup>a, b</sup> | none                 | 10             | 8       | SMD 0.31 higher<br>(0.62 lower to 1.25 higher)                                       |                   | ⊕○○○<br>Very low | CRITICAL   |
| <b>PROM - KOOS pain (better indicated by higher values) – 6 months post-op</b>                        |                   |              |                                   |              |                              |                      |                |         |                                                                                      |                   |                  |            |
| 1<br>Toth 2020                                                                                        | randomised trial  | very serious | not assessable                    | not serious  | very serious <sup>a, b</sup> | none                 | 10             | 8       | SMD 0.39 lower<br>(1.33 lower to 0.55 higher)                                        |                   | ⊕○○○<br>Very low | CRITICAL   |
| <b>PROM - KOOS function sports (better indicated by higher values) – 6 months post-op</b>             |                   |              |                                   |              |                              |                      |                |         |                                                                                      |                   |                  |            |
| 1<br>Toth 2020                                                                                        | randomised trial  | very serious | not assessable                    | not serious  | very serious <sup>a, b</sup> | none                 | 10             | 8       | SMD 0.75 lower<br>(1.72 lower to 0.22 higher)                                        |                   | ⊕○○○<br>Very low | CRITICAL   |
| <b>PROM - KOOS ADL (better indicated by higher values) – 6 months post-op</b>                         |                   |              |                                   |              |                              |                      |                |         |                                                                                      |                   |                  |            |
| 1<br>Toth 2020                                                                                        | randomised trial  | very serious | not assessable                    | not serious  | very serious <sup>a, b</sup> | none                 | 10             | 8       | SMD 0.16 higher<br>(0.78 lower to 1.09 higher)                                       |                   | ⊕○○○<br>Very low | CRITICAL   |
| <b>PROM - IKDC scale (better indicated by higher values) – 6 months post-op</b>                       |                   |              |                                   |              |                              |                      |                |         |                                                                                      |                   |                  |            |
| 1<br>Toth 2020                                                                                        | randomised trial  | very serious | not assessable                    | not serious  | very serious <sup>a, b</sup> | none                 | 10             | 8       | SMD 0.24 lower<br>(1.17 lower to 0.7 higher)                                         |                   | ⊕○○○<br>Very low | CRITICAL   |
| <b>PROM - Tegner (better indicated by higher values) – 6 months post-op</b>                           |                   |              |                                   |              |                              |                      |                |         |                                                                                      |                   |                  |            |
| 1<br>Feil 2011                                                                                        | randomised trial  | very serious | not assessable                    | not serious  | serious <sup>a</sup>         | none                 | 33             | 34      | SMD 0.78 higher<br>(0.28 higher to 1.28 higher)                                      |                   | ⊕○○○<br>Very low | CRITICAL   |
| <b>Laxity</b>                                                                                         |                   |              |                                   |              |                              |                      |                |         |                                                                                      |                   |                  |            |
| 2                                                                                                     |                   |              |                                   |              |                              |                      |                |         |                                                                                      |                   |                  |            |
| <b>Laxity – laxity difference between limbs – 2 months post-op</b>                                    |                   |              |                                   |              |                              |                      |                |         |                                                                                      |                   |                  |            |
| Snyder-Mackler 1991                                                                                   | randomised trial  | serious      | not assessable                    | not serious  | very serious <sup>a, c</sup> | none                 | 5              | 5       | The authors reported no statistically significant difference between the two groups. |                   | ⊕○○○<br>Very low | CRITICAL   |
| <b>Laxity – laxity difference between limbs (better indicated by lower values) – 3 months post-op</b> |                   |              |                                   |              |                              |                      |                |         |                                                                                      |                   |                  |            |
| 1<br>Feil 2011                                                                                        | randomised trial  | serious      | not assessable                    | not serious  | serious <sup>a</sup>         | none                 | 33             | 34      | SMD 0.04 lower<br>(0.51 lower to 0.44 higher)                                        |                   | ⊕⊕○○<br>Low      | CRITICAL   |
| <b>Laxity – laxity difference between limbs (better indicated by lower values) – 6 months post-op</b> |                   |              |                                   |              |                              |                      |                |         |                                                                                      |                   |                  |            |
| 1<br>Feil 2011                                                                                        | randomised trial  | serious      | not assessable                    | not serious  | serious <sup>a</sup>         | none                 | 33             | 34      | SMD 0.04 lower<br>(0.52 lower to 0.44 higher)                                        |                   | ⊕⊕○○<br>Low      | CRITICAL   |
| <b>Swelling</b>                                                                                       |                   |              |                                   |              |                              |                      |                |         |                                                                                      |                   |                  |            |
| 1                                                                                                     |                   |              |                                   |              |                              |                      |                |         |                                                                                      |                   |                  |            |
| <b>Swelling - difference between limbs (better indicated by lower values) – 2 months post-op</b>      |                   |              |                                   |              |                              |                      |                |         |                                                                                      |                   |                  |            |
| 1<br>Ediz 2012                                                                                        | randomised trial  | serious      | not assessable                    | not serious  | very serious <sup>a, b</sup> | none                 | 13             | 13      | SMD 1.93 lower<br>(2.89 lower to 0.97 higher)                                        |                   | ⊕○○○<br>Very low | IMPORTANT  |
| <b>Swelling - difference between limbs (better indicated by lower values) – 3 months post-op</b>      |                   |              |                                   |              |                              |                      |                |         |                                                                                      |                   |                  |            |
| 1<br>Ediz 2012                                                                                        | randomised trial  | serious      | not assessable                    | not serious  | very serious <sup>a, b</sup> | none                 | 13             | 13      | SMD 0.68 lower<br>(1.48 lower to 0.11 higher)                                        |                   | ⊕○○○<br>Very low | IMPORTANT  |
| <b>Swelling - difference between limbs (better indicated by lower values) – 6 months post-op</b>      |                   |              |                                   |              |                              |                      |                |         |                                                                                      |                   |                  |            |
| 1<br>Ediz 2012                                                                                        | randomised trial  | serious      | not assessable                    | not serious  | very serious <sup>a, b</sup> | none                 | 13             | 13      | SMD 0.61 lower<br>(1.40 lower to 0.18 higher)                                        |                   | ⊕○○○<br>Very low | IMPORTANT  |

| Certainty assessment                                                                                       |                   |              |                                     |              |                             |                      | No of patients    |                  | Effect                                          |                                                    | Certainty        | Importance |
|------------------------------------------------------------------------------------------------------------|-------------------|--------------|-------------------------------------|--------------|-----------------------------|----------------------|-------------------|------------------|-------------------------------------------------|----------------------------------------------------|------------------|------------|
| No of studies                                                                                              | Study design      | Risk of bias | Inconsistency                       | Indirectness | Imprecision                 | Other considerations | NMES              | no NMES          | Relative (95% CI)                               | Absolute (95% CI)                                  |                  |            |
| <b>Functional activities</b>                                                                               |                   |              |                                     |              |                             |                      |                   |                  |                                                 |                                                    |                  |            |
| 4                                                                                                          |                   |              |                                     |              |                             |                      |                   |                  |                                                 |                                                    |                  |            |
| <b>Functional - stance time during gait (better indicated by higher values) – 2 months post-op</b>         |                   |              |                                     |              |                             |                      |                   |                  |                                                 |                                                    |                  |            |
| 1<br>Snyder-Mackler 1991                                                                                   | randomised trial  | serious      | not assessable                      | not serious  | very serious <sup>a,b</sup> | none                 | 5                 | 5                | SMD 3.59 higher<br>(1.22 higher to 5.96 higher) | ⊕○○○<br>Very low                                   | IMPORTANT        |            |
| <b>Functional - cadence gait (better indicated by higher values) – 2 months post-op</b>                    |                   |              |                                     |              |                             |                      |                   |                  |                                                 |                                                    |                  |            |
| 1<br>Snyder-Mackler 1991                                                                                   | randomised trial  | serious      | not assessable                      | not serious  | very serious <sup>a,b</sup> | none                 | 5                 | 5                | SMD 3.22 higher<br>(1.03 higher to 5.42 higher) | ⊕○○○<br>Very low                                   | IMPORTANT        |            |
| <b>Functional - walking velocity (better indicated by higher values) – 2 months post-op</b>                |                   |              |                                     |              |                             |                      |                   |                  |                                                 |                                                    |                  |            |
| 1<br>Snyder-Mackler 1991                                                                                   | randomised trial  | serious      | not assessable                      | not serious  | very serious <sup>a,b</sup> | none                 | 5                 | 5                | SMD 4.91 higher<br>(1.88 higher to 7.94 higher) | ⊕○○○<br>Very low                                   | IMPORTANT        |            |
| <b>Functional - shuttle run (time to cover 6.3m) (better indicated by lower values) – 3 months post-op</b> |                   |              |                                     |              |                             |                      |                   |                  |                                                 |                                                    |                  |            |
| 1<br>Feil 2011                                                                                             | randomised trial  | serious      | not assessable                      | not serious  | serious <sup>a</sup>        | none                 | 33                | 34               | SMD 0.52 lower<br>(1.01 lower to 0.03 lower)    | ⊕⊕○○<br>Low                                        | IMPORTANT        |            |
| <b>Functional - single leg hop for distance (better indicated by higher values) – 3 months post-op</b>     |                   |              |                                     |              |                             |                      |                   |                  |                                                 |                                                    |                  |            |
| 1<br>Feil 2011                                                                                             | randomised trial  | serious      | not assessable                      | not serious  | serious <sup>a</sup>        | none                 | 33                | 34               | SMD 0.67 higher<br>(0.18 higher to 1.17 higher) | ⊕⊕○○<br>Low                                        | IMPORTANT        |            |
| <b>Functional - shuttle run (time to cover 6.3m) (better indicated by lower values) – 6 months post-op</b> |                   |              |                                     |              |                             |                      |                   |                  |                                                 |                                                    |                  |            |
| 1<br>Feil 2011                                                                                             | randomised trial  | serious      | not assessable                      | not serious  | serious <sup>a</sup>        | none                 | 33                | 34               | SMD 0.43 lower<br>(0.91 lower to 0.06 higher)   | ⊕⊕○○<br>Low                                        | IMPORTANT        |            |
| <b>Functional - single leg hop for distance (better indicated by higher values) – 6 months post-op</b>     |                   |              |                                     |              |                             |                      |                   |                  |                                                 |                                                    |                  |            |
| 2<br>Feil 2011<br>Toth 2020                                                                                | randomised trials | very serious | very serious<br>I <sup>2</sup> =82% | not serious  | very serious <sup>a,b</sup> | none                 | 43                | 42               | SMD 0.01 higher<br>(1.25 lower to 1.27 higher)  | ⊕○○○<br>Very low                                   | IMPORTANT        |            |
| <b>Functional - patients with ambulation without crutches 4w</b>                                           |                   |              |                                     |              |                             |                      |                   |                  |                                                 |                                                    |                  |            |
| 1<br>Fitzgerald 2003                                                                                       | randomised trial  | very serious | not assessable                      | not serious  | very serious <sup>a,d</sup> | none                 | 20/21<br>(95.2%)  | 18/22<br>(81.8%) | RR 1.16<br>(0.94 to 1.45)                       | 131 more per 1,000<br>(from 49 fewer to 368 more)  | ⊕○○○<br>Very low | IMPORTANT  |
| <b>Functional - patients with ambulation without crutches 8w</b>                                           |                   |              |                                     |              |                             |                      |                   |                  |                                                 |                                                    |                  |            |
| 1<br>Fitzgerald 2003                                                                                       | randomised trial  | very serious | not assessable                      | not serious  | very serious <sup>a,d</sup> | none                 | 21/21<br>(100.0%) | 20/22<br>(90.9%) | RR 1.10<br>(0.94 to 1.28)                       | 91 more per 1,000<br>(from 55 fewer to 255 more)   | ⊕○○○<br>Very low | IMPORTANT  |
| <b>Functional – number of subjects achieving progression to treadmill running at 3 months post-op</b>      |                   |              |                                     |              |                             |                      |                   |                  |                                                 |                                                    |                  |            |
| 1<br>Fitzgerald 2003                                                                                       | randomised trial  | very serious | not assessable                      | not serious  | very serious <sup>a,d</sup> | none                 | 13/21<br>(61.9%)  | 10/22<br>(45.5%) | RR 1.36<br>(0.77 to 2.40)                       | 164 more per 1,000<br>(from 105 fewer to 636 more) | ⊕○○○<br>Very low | IMPORTANT  |
| <b>Functional - number of subjects achieving progression to treadmill running at 4 months post-op</b>      |                   |              |                                     |              |                             |                      |                   |                  |                                                 |                                                    |                  |            |
| 1<br>Fitzgerald 2003                                                                                       | randomised trial  | very serious | not assessable                      | not serious  | very serious <sup>a,d</sup> | none                 | 18/21<br>(85.7%)  | 15/22<br>(68.2%) | RR 1.26<br>(0.90 to 1.76)                       | 177 more per 1,000<br>(from 68 fewer to 518 more)  | ⊕○○○<br>Very low | IMPORTANT  |
| <b>Functional - number of subjects achieving progression to agility training at 4 months post-op</b>       |                   |              |                                     |              |                             |                      |                   |                  |                                                 |                                                    |                  |            |
| 1<br>Fitzgerald 2003                                                                                       | randomised trial  | very serious | not assessable                      | not serious  | very serious <sup>a,d</sup> | none                 | 13/21<br>(61.9%)  | 7/22<br>(31.8%)  | RR 1.95<br>(0.97 to 3.91)                       | 302 more per 1,000<br>(from 10 fewer to 926 more)  | ⊕○○○<br>Very low | IMPORTANT  |
| <b>Activity level</b>                                                                                      |                   |              |                                     |              |                             |                      |                   |                  |                                                 |                                                    |                  |            |
| Tegner - patients with Tegner score 0-3 6m                                                                 |                   |              |                                     |              |                             |                      |                   |                  |                                                 |                                                    |                  |            |

| Certainty assessment                               |                  |              |                |              |                              |                      | No of patients |              | Effect                 |                                                 | Certainty        | Importance |
|----------------------------------------------------|------------------|--------------|----------------|--------------|------------------------------|----------------------|----------------|--------------|------------------------|-------------------------------------------------|------------------|------------|
| No of studies                                      | Study design     | Risk of bias | Inconsistency  | Indirectness | Imprecision                  | Other considerations | NMES           | no NMES      | Relative (95% CI)      | Absolute (95% CI)                               |                  |            |
| 1<br>Ediz 2012                                     | randomised trial | serious      | not assessable | not serious  | very serious <sup>a, d</sup> | none                 | 2/13 (15.4%)   | 2/13 (15.4%) | RR 1.00 (0.16 to 6.07) | 0 fewer per 1,000 (from 129 fewer to 780 more)  | ⊕○○○<br>Very low | CRITICAL   |
| <b>Tegner - patients with Tegner score 4-6 6m</b>  |                  |              |                |              |                              |                      |                |              |                        |                                                 |                  |            |
| 1<br>Ediz 2012                                     | randomised trial | serious      | not assessable | not serious  | very serious <sup>a, d</sup> | none                 | 9/13 (69.2%)   | 8/13 (61.5%) | RR 1.13 (0.64 to 1.97) | 80 more per 1,000 (from 222 fewer to 597 more)  | ⊕○○○<br>Very low | CRITICAL   |
| <b>Tegner - patients with Tegner score 7-10 6m</b> |                  |              |                |              |                              |                      |                |              |                        |                                                 |                  |            |
| 1<br>Ediz 2012                                     | randomised trial | serious      | not assessable | not serious  | very serious <sup>a, d</sup> | none                 | 2/13 (15.4%)   | 3/13 (23.1%) | RR 0.67 (0.13 to 3.35) | 76 fewer per 1,000 (from 201 fewer to 542 more) | ⊕○○○<br>Very low | CRITICAL   |
| <b>Adverse events</b>                              |                  |              |                |              |                              |                      |                |              |                        |                                                 |                  |            |
| Sisk 1987                                          |                  |              |                |              |                              |                      |                |              | None reported          |                                                 |                  | CRITICAL   |
| Delitto 1988                                       |                  |              |                |              |                              |                      |                |              | None reported          |                                                 |                  | CRITICAL   |
| Wigerstad-Lossing 1988                             |                  |              |                |              |                              |                      |                |              | None reported          |                                                 |                  | CRITICAL   |
| Snyder-Mackler 1991                                |                  |              |                |              |                              |                      |                |              | None reported          |                                                 |                  | CRITICAL   |
| Lieber 1996                                        |                  |              |                |              |                              |                      |                |              | None reported          |                                                 |                  | CRITICAL   |
| Paternostro-Sluga 1999                             |                  |              |                |              |                              |                      |                |              | None reported          |                                                 |                  | CRITICAL   |
| Fitzgerald 2003                                    |                  |              |                |              |                              |                      |                |              | None reported          |                                                 |                  | CRITICAL   |
| Hasegawa 2011                                      |                  |              |                |              |                              |                      |                |              | None reported          |                                                 |                  | CRITICAL   |
| Feil 2011                                          |                  |              |                |              |                              |                      |                |              | None reported          |                                                 |                  | CRITICAL   |
| Ediz 2012                                          |                  |              |                |              |                              |                      |                |              | None reported          |                                                 |                  | CRITICAL   |
| Taradaj 2013                                       |                  |              |                |              |                              |                      |                |              | None reported          |                                                 |                  | CRITICAL   |
| Wright 2019                                        |                  |              |                |              |                              |                      |                |              | None reported          |                                                 |                  | CRITICAL   |
| Toth 2020                                          |                  |              |                |              |                              |                      |                |              | None reported          |                                                 |                  | CRITICAL   |

CI: confidence interval; SMD: standardised mean difference; RR: risk ratio

- a. Total participants <800
- b. 95% CI of an SMD extends > 0.5 points in either direction
- c. Not reporting results or SDs
- d. 95% CI boundaries cross the arbitrary thresholds of 0.75 and 1.25

## Functional NMES versus no functional NMES in rehabilitation after ACLR

Bibliography: Ross 2000, Labanca 2018, Moran 2019

| Certainty assessment                                                                                                                                                          |                  |              |                |              |                              |                      | № of patients   |                    | Effect                                          |                   | Certainty        | Importance |
|-------------------------------------------------------------------------------------------------------------------------------------------------------------------------------|------------------|--------------|----------------|--------------|------------------------------|----------------------|-----------------|--------------------|-------------------------------------------------|-------------------|------------------|------------|
| № of studies                                                                                                                                                                  | Study design     | Risk of bias | Inconsistency  | Indirectness | Imprecision                  | Other considerations | Functional NMES | No functional NMES | Relative (95% CI)                               | Absolute (95% CI) |                  |            |
| <b>Strength</b>                                                                                                                                                               |                  |              |                |              |                              |                      |                 |                    |                                                 |                   |                  |            |
| 2                                                                                                                                                                             |                  |              |                |              |                              |                      |                 |                    |                                                 |                   |                  |            |
| <b>Strength - Quadriceps ISOM LSI% (better indicated by higher values) – 1 month post-op</b>                                                                                  |                  |              |                |              |                              |                      |                 |                    |                                                 |                   |                  |            |
| 1                                                                                                                                                                             | randomised trial | very serious | not assessable | not serious  | very serious <sup>a, b</sup> | none                 | 10              | 13                 | SMD 1.54 higher<br>(0.58 higher to 2.50 higher) |                   | ⊕○○○<br>Very low | CRITICAL   |
| <b>Strength - Quadriceps ISOM LSI% (better indicated by higher values) – 2 months post-op</b>                                                                                 |                  |              |                |              |                              |                      |                 |                    |                                                 |                   |                  |            |
| 1                                                                                                                                                                             | randomised trial | serious      | not assessable | not serious  | very serious <sup>a, b</sup> | none                 | 16              | 17                 | SMD 1.30 higher<br>(0.54 higher to 2.06 higher) |                   | ⊕○○○<br>Very low | CRITICAL   |
| <b>Strength - Quadriceps ISOM LSI% (better indicated by higher values) – 6 months post-op</b>                                                                                 |                  |              |                |              |                              |                      |                 |                    |                                                 |                   |                  |            |
| 1                                                                                                                                                                             | randomised trial | serious      | not assessable | not serious  | very serious <sup>a, b</sup> | none                 | 16              | 17                 | SMD 0.85 higher<br>(0.13 higher to 1.56 higher) |                   | ⊕○○○<br>Very low | CRITICAL   |
| <b>Strength - Hamstring ISOM LSI% (better indicated by higher values) – 2 months post-op</b>                                                                                  |                  |              |                |              |                              |                      |                 |                    |                                                 |                   |                  |            |
| 1                                                                                                                                                                             | randomised trial | serious      | not assessable | not serious  | very serious <sup>a, b</sup> | none                 | 16              | 17                 | SMD 0.08 higher<br>(0.6 lower to 0.77 higher)   |                   | ⊕○○○<br>Very low | CRITICAL   |
| <b>Strength - Hamstring ISOM LSI% (better indicated by higher values) – 6 months post-op</b>                                                                                  |                  |              |                |              |                              |                      |                 |                    |                                                 |                   |                  |            |
| 1                                                                                                                                                                             | randomised trial | serious      | not assessable | not serious  | very serious <sup>a, b</sup> | none                 | 16              | 17                 | SMD 0<br>(0.68 lower to 0.69 higher)            |                   | ⊕○○○<br>Very low | CRITICAL   |
| <b>Functional activities</b>                                                                                                                                                  |                  |              |                |              |                              |                      |                 |                    |                                                 |                   |                  |            |
| 3                                                                                                                                                                             |                  |              |                |              |                              |                      |                 |                    |                                                 |                   |                  |            |
| <b>Functional - gait speed (measured using the 10-m walk test) at a self-selected speed (better indicated by higher values) – 1 month post-op</b>                             |                  |              |                |              |                              |                      |                 |                    |                                                 |                   |                  |            |
| 1                                                                                                                                                                             | randomised trial | very serious | not assessable | not serious  | very serious <sup>a, b</sup> | none                 | 10              | 13                 | SMD 0.65 higher<br>(0.2 lower to 1.5 higher)    |                   | ⊕○○○<br>Very low | IMPORTANT  |
| <b>Functional - gait stance percentage of gait cycle (better indicated by higher values) – 1 month post-op</b>                                                                |                  |              |                |              |                              |                      |                 |                    |                                                 |                   |                  |            |
| 1                                                                                                                                                                             | randomised trial | very serious | not assessable | not serious  | very serious <sup>a, b</sup> | none                 | 10              | 13                 | SMD 0.78 higher<br>(0.08 lower to 1.64 higher)  |                   | ⊕○○○<br>Very low | IMPORTANT  |
| <b>Functional – peak knee flexion during unilateral squat (better indicated by higher values) – 6 weeks post-op</b>                                                           |                  |              |                |              |                              |                      |                 |                    |                                                 |                   |                  |            |
| 1                                                                                                                                                                             | randomised trial | very serious | not assessable | not serious  | very serious <sup>a, b</sup> | none                 | 10              | 10                 | SMD 0.34 higher<br>(0.54 lower to 1.23 higher)  |                   | ⊕○○○<br>Very low | IMPORTANT  |
| <b>Functional - number of repetitions performed in a 15-s time frame on a 0.10-m step during a lateral step-up test (better indicated by higher values) – 6 weeks post-op</b> |                  |              |                |              |                              |                      |                 |                    |                                                 |                   |                  |            |
| 1                                                                                                                                                                             | randomised trial | very serious | not assessable | not serious  | very serious <sup>a, b</sup> | none                 | 10              | 10                 | SMD 0.62 higher<br>(0.29 lower to 1.52 higher)  |                   | ⊕○○○<br>Very low | IMPORTANT  |
| <b>Functional - peak vertical forces during sit-to-stand LSI% (better indicated by higher values) – 2 months post-op</b>                                                      |                  |              |                |              |                              |                      |                 |                    |                                                 |                   |                  |            |
| 1                                                                                                                                                                             | randomised trial | serious      | not assessable | not serious  | very serious <sup>a, b</sup> | none                 | 16              | 17                 | SMD 1 higher<br>(0.27 higher to 1.73 higher)    |                   | ⊕○○○<br>Very low | IMPORTANT  |
| <b>Functional - peak vertical forces during sit-to-stand LSI% (better indicated by higher values) – 6 months post-op</b>                                                      |                  |              |                |              |                              |                      |                 |                    |                                                 |                   |                  |            |
| 1                                                                                                                                                                             | randomised trial | serious      | not assessable | not serious  | very serious <sup>a, b</sup> | none                 | 16              | 17                 | SMD 0.92 higher<br>(0.19 higher to 1.64 higher) |                   | ⊕○○○<br>Very low | IMPORTANT  |
| <b>Laxity</b>                                                                                                                                                                 |                  |              |                |              |                              |                      |                 |                    |                                                 |                   |                  |            |
| 1                                                                                                                                                                             |                  |              |                |              |                              |                      |                 |                    |                                                 |                   |                  |            |
| <b>Laxity - absolute displacement using KT-1000 joint arthrometer in mm – (better indicated by lower values) – 6 weeks post-op</b>                                            |                  |              |                |              |                              |                      |                 |                    |                                                 |                   |                  |            |
| 1                                                                                                                                                                             | randomised trial | very serious | not assessable | not serious  | very serious <sup>a, b</sup> | none                 | 10              | 10                 | SMD 0.06 lower<br>(0.94 lower to 0.82 higher)   |                   | ⊕○○○<br>Very low | CRITICAL   |
| <b>Pain</b>                                                                                                                                                                   |                  |              |                |              |                              |                      |                 |                    |                                                 |                   |                  |            |
|                                                                                                                                                                               |                  |              |                |              |                              |                      |                 |                    |                                                 |                   |                  |            |
| <b>Pain - Percentage of patients reporting pain more than 4/10 with maximum voluntary isometric contraction of quads at 30° – 2 months post-op</b>                            |                  |              |                |              |                              |                      |                 |                    |                                                 |                   |                  |            |

| Certainty assessment                                                                                                                               |                  |              |                |              |                              |                      | No of patients  |                    | Effect                                                                                                                         |                                                   | Certainty        | Importance |
|----------------------------------------------------------------------------------------------------------------------------------------------------|------------------|--------------|----------------|--------------|------------------------------|----------------------|-----------------|--------------------|--------------------------------------------------------------------------------------------------------------------------------|---------------------------------------------------|------------------|------------|
| No of studies                                                                                                                                      | Study design     | Risk of bias | Inconsistency  | Indirectness | Imprecision                  | Other considerations | Functional NMES | No functional NMES | Relative (95% CI)                                                                                                              | Absolute (95% CI)                                 |                  |            |
| 1<br>Labanca 2018                                                                                                                                  | randomised trial | very serious | not assessable | not serious  | very serious <sup>a, d</sup> | none                 | 18/100 (18.0%)  | 32/100 (32.0%)     | RR 0.56 (0.34 to 0.93)                                                                                                         | 141 fewer per 1,000 (from 211 fewer to 22 fewer)  | ⊕○○○<br>Very low | CRITICAL   |
| <b>Pain - Percentage of patients reporting pain more than 4/10 with maximum voluntary isometric contraction of quads at 90° – 2 months post-op</b> |                  |              |                |              |                              |                      |                 |                    |                                                                                                                                |                                                   |                  |            |
| 1<br>Labanca 2018                                                                                                                                  | randomised trial | very serious | not assessable | not serious  | very serious <sup>a, d</sup> | none                 | 35/100 (35.0%)  | 53/100 (53.0%)     | RR 0.66 (0.48 to 0.91)                                                                                                         | 180 fewer per 1,000 (from 276 fewer to 48 fewer)  | ⊕○○○<br>Very low | CRITICAL   |
| <b>Pain - Percentage of patients reporting pain more than 4/10 with maximum voluntary isometric contraction of quads at 30° – 6 months post-op</b> |                  |              |                |              |                              |                      |                 |                    |                                                                                                                                |                                                   |                  |            |
| 1<br>Labanca 2018                                                                                                                                  | randomised trial | very serious | not assessable | not serious  | serious <sup>a</sup>         | none                 | 0/100 (0.0%)    | 18/100 (18.0%)     | RR 0.03 (0.00 to 0.44)                                                                                                         | 175 fewer per 1,000 (from 180 fewer to 101 fewer) | ⊕○○○<br>Very low | CRITICAL   |
| <b>Pain - Percentage of patients reporting pain more than 4/10 with maximum voluntary isometric contraction of quads at 90° – 6 months post-op</b> |                  |              |                |              |                              |                      |                 |                    |                                                                                                                                |                                                   |                  |            |
| 1<br>Labanca 2018                                                                                                                                  | randomised trial | very serious | not assessable | not serious  | serious <sup>a</sup>         | none                 | 0/100 (0.0%)    | 17/100 (17.0%)     | RR 0.03 (0.00 to 0.47)                                                                                                         | 165 fewer per 1,000 (from 170 fewer to 90 fewer)  | ⊕○○○<br>Very low | CRITICAL   |
| <b>Atrophy</b>                                                                                                                                     |                  |              |                |              |                              |                      |                 |                    |                                                                                                                                |                                                   |                  |            |
| 1                                                                                                                                                  |                  |              |                |              |                              |                      |                 |                    |                                                                                                                                |                                                   |                  |            |
| <b>Atrophy - mid-thigh circumference difference between limbs (better indicated by lower values) – 2 months post-op</b>                            |                  |              |                |              |                              |                      |                 |                    |                                                                                                                                |                                                   |                  |            |
| 1<br>Labanca 2018                                                                                                                                  | randomised trial | serious      | not assessable | not serious  | very serious <sup>a, b</sup> | none                 | 16              | 17                 | SMD 0.3 lower (0.99 lower to 0.38 higher)                                                                                      |                                                   | ⊕○○○<br>Very low | CRITICAL   |
| <b>Atrophy - mid-thigh circumference difference between limbs (better indicated by lower values) – 6 months post-op</b>                            |                  |              |                |              |                              |                      |                 |                    |                                                                                                                                |                                                   |                  |            |
| 1<br>Labanca 2018                                                                                                                                  | randomised trial | serious      | not assessable | not serious  | very serious <sup>a, b</sup> | none                 | 16              | 17                 | SMD 0.4 lower (1.09 lower to 0.29 higher)                                                                                      |                                                   | ⊕○○○<br>Very low | CRITICAL   |
| <b>Balance</b>                                                                                                                                     |                  |              |                |              |                              |                      |                 |                    |                                                                                                                                |                                                   |                  |            |
| 1                                                                                                                                                  |                  |              |                |              |                              |                      |                 |                    |                                                                                                                                |                                                   |                  |            |
| <b>Balance - Anterior reach test (cm) (better indicated by higher values) – 6 weeks post-op</b>                                                    |                  |              |                |              |                              |                      |                 |                    |                                                                                                                                |                                                   |                  |            |
| 1<br>Ross 2000                                                                                                                                     | randomised trial | very serious | not assessable | not serious  | very serious <sup>a, b</sup> | none                 | 10              | 10                 | SMD 0.07 higher (0.81 lower to 0.95 higher)                                                                                    |                                                   | ⊕○○○<br>Very low | IMPORTANT  |
| <b>Adverse events</b>                                                                                                                              |                  |              |                |              |                              |                      |                 |                    |                                                                                                                                |                                                   |                  |            |
| Ross 2000                                                                                                                                          |                  |              |                |              |                              |                      |                 |                    | None reported                                                                                                                  |                                                   |                  | CRITICAL   |
| Labanca 2018                                                                                                                                       |                  |              |                |              |                              |                      |                 |                    | None reported                                                                                                                  |                                                   |                  | CRITICAL   |
| Moran 2019                                                                                                                                         |                  |              |                |              |                              |                      |                 |                    | Very high drop-out rate (almost 50%), with most needing additional surgery for meniscal repair.No other adverse effects noted. |                                                   |                  | CRITICAL   |

CI: confidence interval; SMD: standardised mean difference; RR: risk ratio

- a. Total participants <800  
b. 95% CI of an SMD extends > 0.5 points in either direction  
c. Not reporting results or SDs  
d. 95% CI boundaries cross the arbitrary thresholds of 0.75 and 1.25

## Electromyographic Biofeedback (EMG-BFB) versus no EMG-BFB in rehabilitation after ACLR

Bibliography: Draper 1990, Christanell 2012

| Certainty assessment                                                                                                |                     |              |                |              |                             |                      | No of patients |                | Effect                                                                                            |                   | Certainty        | Importance |
|---------------------------------------------------------------------------------------------------------------------|---------------------|--------------|----------------|--------------|-----------------------------|----------------------|----------------|----------------|---------------------------------------------------------------------------------------------------|-------------------|------------------|------------|
| No of studies                                                                                                       | Study design        | Risk of bias | Inconsistency  | Indirectness | Imprecision                 | Other considerations | Biofeedback    | No biofeedback | Relative (95% CI)                                                                                 | Absolute (95% CI) |                  |            |
| <b>Strength</b>                                                                                                     |                     |              |                |              |                             |                      |                |                |                                                                                                   |                   |                  |            |
| 1                                                                                                                   |                     |              |                |              |                             |                      |                |                |                                                                                                   |                   |                  |            |
| <b>Strength - Quadriceps CON 45, 60, 90°/s – 3 months post-op</b>                                                   |                     |              |                |              |                             |                      |                |                |                                                                                                   |                   |                  |            |
| 1<br>Draper<br>1990                                                                                                 | randomised<br>trial | very serious | not assessable | not serious  | very serious <sup>a,c</sup> | none                 | 11             | 11             | SDs are not reported. The authors report significant improved strength in the intervention group. |                   | ⊕○○○<br>Very low | CRITICAL   |
| <b>Range of motion (ROM)</b>                                                                                        |                     |              |                |              |                             |                      |                |                |                                                                                                   |                   |                  |            |
| 2                                                                                                                   |                     |              |                |              |                             |                      |                |                |                                                                                                   |                   |                  |            |
| <b>ROM - knee flexion – 6 weeks post-op</b>                                                                         |                     |              |                |              |                             |                      |                |                |                                                                                                   |                   |                  |            |
| 1<br>Christanell<br>2012                                                                                            | randomised<br>trial | very serious | not assessable | not serious  | very serious <sup>a,c</sup> | none                 | 8              | 8              | SDs are not reported. The authors reported no significant difference between groups.              |                   | ⊕○○○<br>Very low | IMPORTANT  |
| <b>ROM - knee extension deficit (using goniometer) (better indicated by lower values) – 1 week post-op</b>          |                     |              |                |              |                             |                      |                |                |                                                                                                   |                   |                  |            |
| 1<br>Christanell<br>2012                                                                                            | randomised<br>trial | very serious | not assessable | not serious  | very serious <sup>a,b</sup> | none                 | 8              | 8              | SMD 0.26 lower<br>(1.25 lower to 0.72 higher)                                                     |                   | ⊕○○○<br>Very low | IMPORTANT  |
| <b>ROM - knee extension deficit (using goniometer) (better indicated by lower values) – 2 weeks post-op</b>         |                     |              |                |              |                             |                      |                |                |                                                                                                   |                   |                  |            |
| 1<br>Christanell<br>2012                                                                                            | randomised<br>trial | very serious | not assessable | not serious  | very serious <sup>a,b</sup> | none                 | 8              | 8              | SMD 0.73 lower<br>(1.75 lower to 0.29 higher)                                                     |                   | ⊕○○○<br>Very low | IMPORTANT  |
| <b>ROM - knee extension deficit (using goniometer) (better indicated by lower values) – 4 weeks post-op</b>         |                     |              |                |              |                             |                      |                |                |                                                                                                   |                   |                  |            |
| 1<br>Christanell<br>2012                                                                                            | randomised<br>trial | very serious | not assessable | not serious  | very serious <sup>a,b</sup> | none                 | 8              | 8              | SMD 1.06 lower<br>(2.13 lower to 0.01 higher)                                                     |                   | ⊕○○○<br>Very low | IMPORTANT  |
| <b>ROM - knee extension deficit (using goniometer) (better indicated by lower values) – 6 weeks post-op</b>         |                     |              |                |              |                             |                      |                |                |                                                                                                   |                   |                  |            |
| 1<br>Christanell<br>2012                                                                                            | randomised<br>trial | very serious | not assessable | not serious  | very serious <sup>a,b</sup> | none                 | 8              | 8              | SMD 2.77 lower<br>(4.24 lower to 1.29 lower)                                                      |                   | ⊕○○○<br>Very low | IMPORTANT  |
| <b>ROM - knee extension deficit (using high-heel-distance) (better indicated by lower values) – 1 week post-op</b>  |                     |              |                |              |                             |                      |                |                |                                                                                                   |                   |                  |            |
| 1<br>Christanell<br>2012                                                                                            | randomised<br>trial | very serious | not assessable | not serious  | very serious <sup>a,b</sup> | none                 | 8              | 8              | SMD 0.17 lower<br>(1.15 lower to 0.82 higher)                                                     |                   | ⊕○○○<br>Very low | IMPORTANT  |
| <b>ROM - knee extension deficit (using high-heel-distance) (better indicated by lower values) – 2 weeks post-op</b> |                     |              |                |              |                             |                      |                |                |                                                                                                   |                   |                  |            |
| 1<br>Christanell<br>2012                                                                                            | randomised<br>trial | very serious | not assessable | not serious  | very serious <sup>a,b</sup> | none                 | 8              | 8              | SMD 0.10 lower<br>(1.08 lower to 0.88 higher)                                                     |                   | ⊕○○○<br>Very low | IMPORTANT  |
| <b>ROM - knee extension deficit (using high-heel-distance) (better indicated by lower values) – 4 weeks post-op</b> |                     |              |                |              |                             |                      |                |                |                                                                                                   |                   |                  |            |
| 1<br>Christanell<br>2012                                                                                            | randomised<br>trial | very serious | not assessable | not serious  | very serious <sup>a,b</sup> | none                 | 8              | 8              | SMD 0.35 lower<br>(1.34 lower to 0.64 higher)                                                     |                   | ⊕○○○<br>Very low | IMPORTANT  |
| <b>ROM - knee extension deficit (using high-heel-distance) (better indicated by lower values) – 6 weeks post-op</b> |                     |              |                |              |                             |                      |                |                |                                                                                                   |                   |                  |            |
| 1<br>Christanell<br>2012                                                                                            | randomised<br>trial | very serious | not assessable | not serious  | very serious <sup>a,b</sup> | none                 | 8              | 8              | SMD 1.37 lower<br>(2.50 lower to 0.25 lower)                                                      |                   | ⊕○○○<br>Very low | IMPORTANT  |
| <b>ROM - knee extension – days to full recovery (better indicated by lower values)</b>                              |                     |              |                |              |                             |                      |                |                |                                                                                                   |                   |                  |            |
| 1<br>Draper<br>1990                                                                                                 | randomised<br>trial | very serious | not assessable | not serious  | very serious <sup>a,b</sup> | none                 | 11             | 11             | SMD 0.94 lower<br>(1.83 lower to 0.05 lower)                                                      |                   | ⊕○○○<br>Very low | IMPORTANT  |
| <b>Patients reported outcomes (PROM)</b>                                                                            |                     |              |                |              |                             |                      |                |                |                                                                                                   |                   |                  |            |
| 1                                                                                                                   |                     |              |                |              |                             |                      |                |                |                                                                                                   |                   |                  |            |

| Certainty assessment                 |                     |              |                |              |                              |                      | No of patients |                | Effect                                                                               |                   | Certainty        | Importance |
|--------------------------------------|---------------------|--------------|----------------|--------------|------------------------------|----------------------|----------------|----------------|--------------------------------------------------------------------------------------|-------------------|------------------|------------|
| No of studies                        | Study design        | Risk of bias | Inconsistency  | Indirectness | Imprecision                  | Other considerations | Biofeedback    | No biofeedback | Relative (95% CI)                                                                    | Absolute (95% CI) |                  |            |
| <b>PROM – IKDC – 6 weeks post-op</b> |                     |              |                |              |                              |                      |                |                |                                                                                      |                   |                  |            |
| 1<br>Christanell<br>2012             | randomised<br>trial | very serious | not assessable | not serious  | very serious <sup>a, c</sup> | none                 | 8              | 8              | SDs are not reported. The authors reported no significant difference between groups. |                   | ⊕○○○<br>Very low | CRITICAL   |
| <b>Pain</b>                          |                     |              |                |              |                              |                      |                |                |                                                                                      |                   |                  |            |
| 1                                    |                     |              |                |              |                              |                      |                |                |                                                                                      |                   |                  |            |
| <b>Pain VAS – 6 weeks post-op</b>    |                     |              |                |              |                              |                      |                |                |                                                                                      |                   |                  |            |
| 1<br>Christanell<br>2012             | randomised<br>trial | very serious | not assessable | not serious  | very serious <sup>a, c</sup> | none                 | 8              | 8              | SDs are not reported. The authors reported no significant difference between groups. |                   | ⊕○○○<br>Very low | CRITICAL   |
| <b>Swelling</b>                      |                     |              |                |              |                              |                      |                |                |                                                                                      |                   |                  |            |
| 1                                    |                     |              |                |              |                              |                      |                |                |                                                                                      |                   |                  |            |
| <b>Swelling – 6 weeks post-op</b>    |                     |              |                |              |                              |                      |                |                |                                                                                      |                   |                  |            |
| 1<br>Christanell<br>2012             | randomised<br>trial | very serious | not assessable | not serious  | very serious <sup>a, c</sup> | none                 | 8              | 8              | SDs are not reported. The authors reported no significant difference between groups. |                   | ⊕○○○<br>Very low | IMPORTANT  |
| <b>Adverse events</b>                |                     |              |                |              |                              |                      |                |                |                                                                                      |                   |                  |            |
| Draper<br>1990                       |                     |              |                |              |                              |                      |                |                | None reported                                                                        |                   |                  | CRITICAL   |
| Christanell<br>2012                  |                     |              |                |              |                              |                      |                |                | None reported                                                                        |                   |                  | CRITICAL   |

CI: confidence interval; SMD: standardised mean difference

- a. Total participants <800
- b. 95% CI of an SMD extends > 0.5 points in either direction
- c. Not reporting results or SDs

## Blood flow restriction (BFR) versus no BFR in rehabilitation after ACLR

Bibliography: Ohta 2003, Iversen 2016, Hughes 2019a, Hughes 2019b, Curran 2020

| Certainty assessment                                                                                                                     |                   |              |                                      |              |                              |                      | No of patients |        | Effect                                          |                   | Certainty | Importance |
|------------------------------------------------------------------------------------------------------------------------------------------|-------------------|--------------|--------------------------------------|--------------|------------------------------|----------------------|----------------|--------|-------------------------------------------------|-------------------|-----------|------------|
| No of studies                                                                                                                            | Study design      | Risk of bias | Inconsistency                        | Indirectness | Imprecision                  | Other considerations | BFR            | no BFR | Relative (95% CI)                               | Absolute (95% CI) |           |            |
| <b>Strength - quadriceps</b>                                                                                                             |                   |              |                                      |              |                              |                      |                |        |                                                 |                   |           |            |
| 3                                                                                                                                        |                   |              |                                      |              |                              |                      |                |        |                                                 |                   |           |            |
| <b>Quadriceps strength CON 60°/s (better indicated by higher values) – 2 months post-op</b>                                              |                   |              |                                      |              |                              |                      |                |        |                                                 |                   |           |            |
| 1<br>Hughes 2019a                                                                                                                        | randomised trial  | serious      | not assessable                       | not serious  | very serious <sup>a, b</sup> | none                 | 12             | 12     | SMD 0.43 higher<br>(0.38 lower to 1.24 higher)  | ⊕○○○<br>Very low  |           | CRITICAL   |
| <b>Quadriceps strength CON 150°/s (better indicated by higher values) – 2 months post-op</b>                                             |                   |              |                                      |              |                              |                      |                |        |                                                 |                   |           |            |
| 1<br>Hughes 2019a                                                                                                                        | randomised trial  | serious      | not assessable                       | not serious  | very serious <sup>a, b</sup> | none                 | 12             | 12     | SMD 0.62 higher<br>(0.2 lower to 1.44 higher)   | ⊕○○○<br>Very low  |           | CRITICAL   |
| <b>Quadriceps strength CON 300°/s (better indicated by higher values) – 2 months post-op</b>                                             |                   |              |                                      |              |                              |                      |                |        |                                                 |                   |           |            |
| 1<br>Hughes 2019a                                                                                                                        | randomised trial  | serious      | not assessable                       | not serious  | very serious <sup>a, b</sup> | none                 | 12             | 12     | SMD 0.76 higher<br>(0.07 lower to 1.6 higher)   | ⊕○○○<br>Very low  |           | CRITICAL   |
| <b>Quadriceps strength (measured using 10RM at leg press (better indicated by higher values) – 2 months post-op</b>                      |                   |              |                                      |              |                              |                      |                |        |                                                 |                   |           |            |
| 1<br>Hughes 2019a                                                                                                                        | randomised trial  | serious      | not assessable                       | not serious  | very serious <sup>a, b</sup> | none                 | 12             | 12     | SMD 0.55 higher<br>(0.27 lower to 1.36 higher)  | ⊕○○○<br>Very low  |           | CRITICAL   |
| <b>Quadriceps strength ISOM 60 (better indicated by higher values) – 4-5 months post-op</b>                                              |                   |              |                                      |              |                              |                      |                |        |                                                 |                   |           |            |
| 2<br>Ohta 2003<br>Curran 2020                                                                                                            | randomised trials | very serious | very serious<br>I <sup>2</sup> = 85% | not serious  | very serious <sup>a, b</sup> | none                 | 40             | 38     | SMD 0.48 higher<br>(0.70 lower to 1.67 higher)  | ⊕○○○<br>Very low  |           | CRITICAL   |
| <b>Quadriceps strength CON 60°/s (better indicated by higher values) – 4-5 months post-op</b>                                            |                   |              |                                      |              |                              |                      |                |        |                                                 |                   |           |            |
| 1<br>Ohta 2003<br>Curran 2020                                                                                                            | randomised trials | very serious | very serious<br>I <sup>2</sup> = 83% | not serious  | very serious <sup>a, b</sup> | none                 | 40             | 38     | SMD 0.66 higher<br>(0.49 lower to 1.82 higher)  | ⊕○○○<br>Very low  |           | CRITICAL   |
| <b>Quadriceps strength CON 180°/s; values reported as LSI% (better indicated by higher values) – 4 months post-op</b>                    |                   |              |                                      |              |                              |                      |                |        |                                                 |                   |           |            |
| 1<br>Ohta 2003                                                                                                                           | randomised trial  | very serious | not assessable                       | not serious  | very serious <sup>a, b</sup> | none                 | 22             | 22     | SMD 0.91 higher<br>(0.28 higher to 1.53 higher) | ⊕○○○<br>Very low  |           | CRITICAL   |
| <b>Quadriceps strength ISOM 60° (better indicated by higher values) – at the time to return to activity, approx. 9.5 months post-op</b>  |                   |              |                                      |              |                              |                      |                |        |                                                 |                   |           |            |
| 1<br>Curran 2020                                                                                                                         | randomised trial  | very serious | not assessable                       | not serious  | very serious <sup>a, b</sup> | none                 | 18             | 16     | SMD 0.01 higher<br>(0.66 lower to 0.63 higher)  | ⊕○○○<br>Very low  |           | CRITICAL   |
| <b>Quadriceps strength CON 60°/s (better indicated by higher values) – at the time to return to activity, approx. 9.5 months post-op</b> |                   |              |                                      |              |                              |                      |                |        |                                                 |                   |           |            |
| 1<br>Curran 2020                                                                                                                         | randomised trial  | very serious | not assessable                       | not serious  | very serious <sup>a, b</sup> | none                 | 18             | 16     | SMD 0.25 higher<br>(0.43 lower to 0.93 higher)  | ⊕○○○<br>Very low  |           | CRITICAL   |
| <b>Strength - hamstring</b>                                                                                                              |                   |              |                                      |              |                              |                      |                |        |                                                 |                   |           |            |
| <b>Hamstring strength CON 60°/s (better indicated by higher values) – 2 months post-op</b>                                               |                   |              |                                      |              |                              |                      |                |        |                                                 |                   |           |            |
| 1<br>Hughes 2019a                                                                                                                        | randomised trial  | serious      | not assessable                       | not serious  | very serious <sup>a, b</sup> | none                 | 12             | 12     | SMD 0.96 higher<br>(0.11 higher to 1.82 higher) | ⊕○○○<br>Very low  |           | CRITICAL   |
| <b>Hamstring strength CON 150°/s (better indicated by higher values) – 2 months post-op</b>                                              |                   |              |                                      |              |                              |                      |                |        |                                                 |                   |           |            |
| 1<br>Hughes 2019a                                                                                                                        | randomised trial  | serious      | not assessable                       | not serious  | very serious <sup>a, b</sup> | none                 | 12             | 12     | SMD 1.26 higher<br>(0.37 higher to 2.16 higher) | ⊕○○○<br>Very low  |           | CRITICAL   |
| <b>Hamstring strength CON 300°/s (better indicated by higher values) – 2 months post-op</b>                                              |                   |              |                                      |              |                              |                      |                |        |                                                 |                   |           |            |
| 1<br>Hughes 2019a                                                                                                                        | randomised trial  | serious      | not assessable                       | not serious  | very serious <sup>a, b</sup> | none                 | 12             | 12     | SMD 1.37 higher<br>(0.46 higher to 2.27 higher) | ⊕○○○<br>Very low  |           | CRITICAL   |
| <b>Hamstring strength ISOM 60° (better indicated by higher values) – 4 months post-op</b>                                                |                   |              |                                      |              |                              |                      |                |        |                                                 |                   |           |            |

| Certainty assessment                                                                                                                                                                                                    |              |                  |               |                |             |                             | No of patients |        | Effect            |                                                 | Certainty        | Importance |
|-------------------------------------------------------------------------------------------------------------------------------------------------------------------------------------------------------------------------|--------------|------------------|---------------|----------------|-------------|-----------------------------|----------------|--------|-------------------|-------------------------------------------------|------------------|------------|
| No of studies                                                                                                                                                                                                           | Study design | Risk of bias     | Inconsistency | Indirectness   | Imprecision | Other considerations        | BFR            | no BFR | Relative (95% CI) | Absolute (95% CI)                               |                  |            |
| 1                                                                                                                                                                                                                       | Ohta 2003    | randomised trial | very serious  | not assessable | not serious | very serious <sup>a,b</sup> | none           | 22     | 22                | SMD 0.78 higher<br>(0.16 higher to 1.4 higher)  | ⊕○○○<br>Very low | CRITICAL   |
| <b>Hamstring strength CON 60°/s (better indicated by higher values) – 4 months post-op</b>                                                                                                                              |              |                  |               |                |             |                             |                |        |                   |                                                 |                  |            |
| 1                                                                                                                                                                                                                       | Ohta 2003    | randomised trial | very serious  | not assessable | not serious | very serious <sup>a,b</sup> | none           | 22     | 22                | SMD 0.61 higher<br>(0 to 1.21 higher)           | ⊕○○○<br>Very low | CRITICAL   |
| <b>Hamstring strength CON 180°/s (better indicated by higher values) – 4 months post-op</b>                                                                                                                             |              |                  |               |                |             |                             |                |        |                   |                                                 |                  |            |
| 1                                                                                                                                                                                                                       | Ohta 2003    | randomised trial | very serious  | not assessable | not serious | very serious <sup>a,b</sup> | none           | 22     | 22                | SMD 0.64 higher<br>(0.03 higher to 1.25 higher) | ⊕○○○<br>Very low | CRITICAL   |
| <b>Atrophy</b>                                                                                                                                                                                                          |              |                  |               |                |             |                             |                |        |                   |                                                 |                  |            |
| 4                                                                                                                                                                                                                       |              |                  |               |                |             |                             |                |        |                   |                                                 |                  |            |
| <b>Atrophy - Knee extensors cross-sectional area (cm<sup>2</sup>) using MRI at 40% the femur length (better indicated by higher values) – 16 days post-op</b>                                                           |              |                  |               |                |             |                             |                |        |                   |                                                 |                  |            |
| 1                                                                                                                                                                                                                       | Iversen 2016 | randomised trial | very serious  | not assessable | not serious | very serious <sup>a,b</sup> | none           | 12     | 12                | SMD 0.51 higher<br>(0.3 lower to 1.33 higher)   | ⊕○○○<br>Very low | CRITICAL   |
| <b>Atrophy - Knee extensors cross-sectional area (cm<sup>2</sup>) using MRI at 50% the femur length (better indicated by higher values) – 16 days post-op</b>                                                           |              |                  |               |                |             |                             |                |        |                   |                                                 |                  |            |
| 1                                                                                                                                                                                                                       | Iversen 2016 | randomised trial | very serious  | not assessable | not serious | very serious <sup>a,b</sup> | none           | 12     | 12                | SMD 0.75 higher<br>(0.08 lower to 1.58 higher)  | ⊕○○○<br>Very low | CRITICAL   |
| <b>Atrophy - Vastus lateralis muscle thickness (cm) using ultrasound at 50% of the femur, reported as difference from pre-intervention values (better indicated by higher values) – 2 months post-op</b>                |              |                  |               |                |             |                             |                |        |                   |                                                 |                  |            |
| 1                                                                                                                                                                                                                       | Hughes 2019a | randomised trial | serious       | not assessable | not serious | very serious <sup>a,b</sup> | none           | 12     | 12                | SMD 0.38 lower<br>(1.19 lower to 0.43 higher)   | ⊕○○○<br>Very low | CRITICAL   |
| <b>Atrophy - Vastus lateralis pennation angle (°) using ultrasound at 50% of the femur, reported as difference from pre-intervention values (better indicated by higher values) – 2 months post-op</b>                  |              |                  |               |                |             |                             |                |        |                   |                                                 |                  |            |
| 1                                                                                                                                                                                                                       | Hughes 2019a | randomised trial | serious       | not assessable | not serious | very serious <sup>a,b</sup> | none           | 12     | 12                | SMD 0.36 higher<br>(0.45 lower to 1.17 higher)  | ⊕○○○<br>Very low | CRITICAL   |
| <b>Atrophy - Vastus lateralis fascicle length (cm) using ultrasound at 50% of the femur, reported as difference from pre-intervention values (better indicated by higher values) – 2 months post-op</b>                 |              |                  |               |                |             |                             |                |        |                   |                                                 |                  |            |
| 1                                                                                                                                                                                                                       | Hughes 2019a | randomised trial | serious       | not assessable | not serious | very serious <sup>a,b</sup> | none           | 12     | 12                | SMD 0.03 lower<br>(0.83 lower to 0.77 higher)   | ⊕○○○<br>Very low | CRITICAL   |
| <b>Atrophy - Knee extensors cross-sectional area (cm<sup>2</sup>) using MRI at 15cm proximal to the patella (better indicated by higher values) – 4 months post-op</b>                                                  |              |                  |               |                |             |                             |                |        |                   |                                                 |                  |            |
| 1                                                                                                                                                                                                                       | Ohta 2003    | randomised trial | very serious  | not assessable | not serious | very serious <sup>a,b</sup> | none           | 22     | 22                | SMD 0.77 higher<br>(0.15 higher to 1.38 higher) | ⊕○○○<br>Very low | CRITICAL   |
| <b>Atrophy - Knee flexors+adductors cross-sectional area (cm<sup>2</sup>) using MRI at 15cm proximal to the patella (better indicated by higher values) – 4 months post-op</b>                                          |              |                  |               |                |             |                             |                |        |                   |                                                 |                  |            |
| 1                                                                                                                                                                                                                       | Ohta 2003    | randomised trial | very serious  | not assessable | not serious | very serious <sup>a,b</sup> | none           | 22     | 22                | SMD 0.14 higher<br>(0.45 lower to 0.73 higher)  | ⊕○○○<br>Very low | CRITICAL   |
| <b>Atrophy - single muscle fiber diameter type I of Vastus lateralis; reported as preoperative/postoperative ratio (%); (better indicated by higher values) – 4 months post-op</b>                                      |              |                  |               |                |             |                             |                |        |                   |                                                 |                  |            |
| 1                                                                                                                                                                                                                       | Ohta 2003    | randomised trial | very serious  | not assessable | not serious | very serious <sup>a,b</sup> | none           | 8      | 8                 | SMD 0.72 higher<br>(0.3 lower to 1.74 higher)   | ⊕○○○<br>Very low | CRITICAL   |
| <b>Atrophy - single muscle fiber diameter type II of Vastus lateralis; reported as preoperative/postoperative ratio (%); (better indicated by higher values) – 4 months post-op</b>                                     |              |                  |               |                |             |                             |                |        |                   |                                                 |                  |            |
| 1                                                                                                                                                                                                                       | Ohta 2003    | randomised trial | very serious  | not assessable | not serious | very serious <sup>a,b</sup> | none           | 8      | 8                 | SMD 0.63 higher<br>(0.38 lower to 1.64 higher)  | ⊕○○○<br>Very low | CRITICAL   |
| <b>Atrophy - Rectus femoris muscle volume (cm<sup>3</sup>) using ultrasound at 10-15cm superior to the patella (better indicated by higher values) – 5 months post-op</b>                                               |              |                  |               |                |             |                             |                |        |                   |                                                 |                  |            |
| 1                                                                                                                                                                                                                       | Curran 2020  | randomised trial | very serious  | not assessable | not serious | very serious <sup>a,b</sup> | none           | 18     | 16                | SMD 0.31 higher<br>(0.37 lower to 0.99 higher)  | ⊕○○○<br>Very low | CRITICAL   |
| <b>Atrophy - Rectus femoris muscle volume (cm<sup>3</sup>) using ultrasound at 10-15cm superior to the patella; (better indicated by higher values) – at the time to return to activity, approx. 9.5 months post-op</b> |              |                  |               |                |             |                             |                |        |                   |                                                 |                  |            |
| 1                                                                                                                                                                                                                       | Curran 2020  | randomised trial | very serious  | not assessable | not serious | very serious <sup>a,b</sup> | none           | 18     | 16                | SMD 0.05 higher<br>(0.62 lower to 0.73 higher)  | ⊕○○○<br>Very low | CRITICAL   |
| <b>Pain</b>                                                                                                                                                                                                             |              |                  |               |                |             |                             |                |        |                   |                                                 |                  |            |
| 1                                                                                                                                                                                                                       |              |                  |               |                |             |                             |                |        |                   |                                                 |                  |            |
| <b>Pain - VAS scale, session knee pain (better indicated by lower values) – 2 months post-op</b>                                                                                                                        |              |                  |               |                |             |                             |                |        |                   |                                                 |                  |            |
| 1                                                                                                                                                                                                                       | Hughes 2019b | randomised trial | very serious  | not assessable | not serious | very serious <sup>a,b</sup> | none           | 12     | 12                | SMD 1.84 lower<br>(2.83 lower to 0.86 lower)    | ⊕○○○<br>Very low | CRITICAL   |

| Certainty assessment                                                                                                                                            |                  |              |                |              |                              |                      | No of patients |        | Effect                                          |                   | Certainty        | Importance |
|-----------------------------------------------------------------------------------------------------------------------------------------------------------------|------------------|--------------|----------------|--------------|------------------------------|----------------------|----------------|--------|-------------------------------------------------|-------------------|------------------|------------|
| No of studies                                                                                                                                                   | Study design     | Risk of bias | Inconsistency  | Indirectness | Imprecision                  | Other considerations | BFR            | no BFR | Relative (95% CI)                               | Absolute (95% CI) |                  |            |
| <b>Pain - VAS scale, 24h post training knee pain (better indicated by lower values) – 2 months post-op</b>                                                      |                  |              |                |              |                              |                      |                |        |                                                 |                   |                  |            |
| 1<br>Hughes 2019b                                                                                                                                               | randomised trial | very serious | not assessable | not serious  | very serious <sup>a, b</sup> | none                 | 12             | 12     | SMD 1.75 lower<br>(2.72 lower to 0.78 lower)    |                   | ⊕○○○<br>Very low | CRITICAL   |
| <b>Pain - VAS scale, muscle pain (better indicated by lower values) – 2 months post-op</b>                                                                      |                  |              |                |              |                              |                      |                |        |                                                 |                   |                  |            |
| 1<br>Hughes 2019b                                                                                                                                               | randomised trial | very serious | not assessable | not serious  | very serious <sup>a, b</sup> | none                 | 12             | 12     | SMD 2.04 higher<br>(1.02 higher to 3.06 higher) |                   | ⊕○○○<br>Very low | CRITICAL   |
| <b>Patient-reported outcome measures (PROM)</b>                                                                                                                 |                  |              |                |              |                              |                      |                |        |                                                 |                   |                  |            |
| 2                                                                                                                                                               |                  |              |                |              |                              |                      |                |        |                                                 |                   |                  |            |
| <b>IKDC reported as difference from pre-intervention values (better indicated by higher values) – 2 months post-op</b>                                          |                  |              |                |              |                              |                      |                |        |                                                 |                   |                  |            |
| 1<br>Hughes 2019a                                                                                                                                               | randomised trial | very serious | not assessable | not serious  | very serious <sup>a, b</sup> | none                 | 12             | 12     | SMD 1.49 higher<br>(0.57 higher to 2.42 higher) |                   | ⊕○○○<br>Very low | CRITICAL   |
| <b>LEFS (Lower extremity function scale) (reported as difference from pre-intervention values (better indicated by higher values) – 2 months post-op</b>        |                  |              |                |              |                              |                      |                |        |                                                 |                   |                  |            |
| 1<br>Hughes 2019a                                                                                                                                               | randomised trial | very serious | not assessable | not serious  | very serious <sup>a, b</sup> | none                 | 12             | 12     | SMD 0.89 higher<br>(0.05 higher to 1.74 higher) |                   | ⊕○○○<br>Very low | CRITICAL   |
| <b>Lysholm scale reported as difference from pre-intervention values (better indicated by higher values) – 2 months post-op</b>                                 |                  |              |                |              |                              |                      |                |        |                                                 |                   |                  |            |
| 1<br>Hughes 2019a                                                                                                                                               | randomised trial | very serious | not assessable | not serious  | very serious <sup>a, b</sup> | none                 | 12             | 12     | SMD 1.08 higher<br>(0.21 higher to 1.95 higher) |                   | ⊕○○○<br>Very low | CRITICAL   |
| <b>KOOS-pain reported as difference from pre-intervention values (better indicated by higher values) – 2 months post-op</b>                                     |                  |              |                |              |                              |                      |                |        |                                                 |                   |                  |            |
| 1<br>Hughes 2019a                                                                                                                                               | randomised trial | very serious | not assessable | not serious  | very serious <sup>a, b</sup> | none                 | 12             | 12     | SMD 1.74 higher<br>(0.78 higher to 2.71 higher) |                   | ⊕○○○<br>Very low | CRITICAL   |
| <b>KOOS-symptoms reported as difference from pre-intervention values (better indicated by higher values) – 2 months post-op</b>                                 |                  |              |                |              |                              |                      |                |        |                                                 |                   |                  |            |
| 1<br>Hughes 2019a                                                                                                                                               | randomised trial | very serious | not assessable | not serious  | very serious <sup>a, b</sup> | none                 | 12             | 12     | SMD 0.77 higher<br>(0.06 lower to 1.61 higher)  |                   | ⊕○○○<br>Very low | CRITICAL   |
| <b>KOOS-ADL reported as difference from pre-intervention values (better indicated by higher values) – 2 months post-op</b>                                      |                  |              |                |              |                              |                      |                |        |                                                 |                   |                  |            |
| 1<br>Hughes 2019a                                                                                                                                               | randomised trial | very serious | not assessable | not serious  | very serious <sup>a, b</sup> | none                 | 12             | 12     | SMD 1.16 higher<br>(0.28 higher to 2.04 higher) |                   | ⊕○○○<br>Very low | CRITICAL   |
| <b>KOOS-QOL reported as difference from pre-intervention values (better indicated by higher values) – 2 months post-op</b>                                      |                  |              |                |              |                              |                      |                |        |                                                 |                   |                  |            |
| 1<br>Hughes 2019a                                                                                                                                               | randomised trial | very serious | not assessable | not serious  | very serious <sup>a, b</sup> | none                 | 12             | 12     | SMD 0.65 higher<br>(0.18 lower to 1.47 higher)  |                   | ⊕○○○<br>Very low | CRITICAL   |
| <b>IKDC (better indicated by higher values) – 5 months post-op</b>                                                                                              |                  |              |                |              |                              |                      |                |        |                                                 |                   |                  |            |
| 1<br>Curran 2020                                                                                                                                                | randomised trial | very serious | not assessable | not serious  | very serious <sup>a, b</sup> | none                 | 18             | 16     | SMD 0.35 lower<br>(1.03 lower to 0.33 higher)   |                   | ⊕○○○<br>Very low | CRITICAL   |
| <b>IKDC (better indicated by higher values) – at the time to return to activity, approx. 9.5 months post-op</b>                                                 |                  |              |                |              |                              |                      |                |        |                                                 |                   |                  |            |
| 1<br>Curran 2020                                                                                                                                                | randomised trial | very serious | not assessable | not serious  | very serious <sup>a, b</sup> | none                 | 18             | 16     | SMD 0.42 lower<br>(1.1 lower to 0.26 higher)    |                   | ⊕○○○<br>Very low | CRITICAL   |
| <b>Range of motion (ROM)</b>                                                                                                                                    |                  |              |                |              |                              |                      |                |        |                                                 |                   |                  |            |
| 2                                                                                                                                                               |                  |              |                |              |                              |                      |                |        |                                                 |                   |                  |            |
| <b>Flexion deficit reported as difference from pre-intervention values (better indicated by higher values) – 2 months post-op</b>                               |                  |              |                |              |                              |                      |                |        |                                                 |                   |                  |            |
| 1<br>Hughes 2019a                                                                                                                                               | randomised trial | serious      | not assessable | not serious  | very serious <sup>a, b</sup> | none                 | 12             | 12     | SMD 2.35 higher<br>(1.27 higher to 3.43 higher) |                   | ⊕○○○<br>Very low | IMPORTANT  |
| <b>Flexion - knee flexion (better indicated by higher values) – 4 months post-op</b>                                                                            |                  |              |                |              |                              |                      |                |        |                                                 |                   |                  |            |
| 1<br>Ohta 2003                                                                                                                                                  | randomised trial | very serious | not assessable | not serious  | very serious <sup>a, b</sup> | none                 | 22             | 22     | SMD 0.4 lower<br>(0.99 lower to 0.2 higher)     |                   | ⊕○○○<br>Very low | IMPORTANT  |
| <b>Extension deficit side to side difference (°) reported as difference from pre-intervention values (better indicated by higher values) – 2 months post-op</b> |                  |              |                |              |                              |                      |                |        |                                                 |                   |                  |            |

| Certainty assessment                                                                                                                                                              |                  |              |                |              |                             |                      | No of patients |        | Effect                                                                         |                   | Certainty        | Importance |
|-----------------------------------------------------------------------------------------------------------------------------------------------------------------------------------|------------------|--------------|----------------|--------------|-----------------------------|----------------------|----------------|--------|--------------------------------------------------------------------------------|-------------------|------------------|------------|
| No of studies                                                                                                                                                                     | Study design     | Risk of bias | Inconsistency  | Indirectness | Imprecision                 | Other considerations | BFR            | no BFR | Relative (95% CI)                                                              | Absolute (95% CI) |                  |            |
| 1<br>Hughes 2019a                                                                                                                                                                 | randomised trial | serious      | not assessable | not serious  | very serious <sup>a,b</sup> | none                 | 12             | 12     | SMD 0.1 higher<br>(0.7 lower to 0.9 higher)                                    |                   | ⊕○○○<br>Very low | IMPORTANT  |
| <b>Extension deficit (better indicated by lower values) – 4 months post-op</b>                                                                                                    |                  |              |                |              |                             |                      |                |        |                                                                                |                   |                  |            |
| 1<br>Ohta 2003                                                                                                                                                                    | randomised trial | very serious | not assessable | not serious  | very serious <sup>a,b</sup> | none                 | 22             | 22     | SMD 0.32 lower<br>(0.92 lower to 0.27 higher)                                  |                   | ⊕○○○<br>Very low | IMPORTANT  |
| <b>Balance</b>                                                                                                                                                                    |                  |              |                |              |                             |                      |                |        |                                                                                |                   |                  |            |
| 2                                                                                                                                                                                 |                  |              |                |              |                             |                      |                |        |                                                                                |                   |                  |            |
| <b>Balance - Star excursion balance test anterior; reported as difference from pre-intervention values (better indicated by higher values) – 2 months post-op</b>                 |                  |              |                |              |                             |                      |                |        |                                                                                |                   |                  |            |
| 1<br>Hughes 2019a                                                                                                                                                                 | randomised trial | serious      | not assessable | not serious  | very serious <sup>a,b</sup> | none                 | 12             | 12     | SMD 1.78 higher<br>(0.81 higher to 2.76 higher)                                |                   | ⊕○○○<br>Very low | IMPORTANT  |
| <b>Balance - Star excursion balance test posteromedial; reported as difference from pre-intervention values (better indicated by higher values) – 2 months post-op</b>            |                  |              |                |              |                             |                      |                |        |                                                                                |                   |                  |            |
| 1<br>Hughes 2019a                                                                                                                                                                 | randomised trial | serious      | not assessable | not serious  | very serious <sup>a,b</sup> | none                 | 12             | 12     | SMD 1.47 higher<br>(0.55 higher to 2.39 higher)                                |                   | ⊕○○○<br>Very low | IMPORTANT  |
| <b>Balance - Star excursion balance test posterolateral; reported as difference from pre-intervention values (better indicated by higher values) – 2 months post-op</b>           |                  |              |                |              |                             |                      |                |        |                                                                                |                   |                  |            |
| 1<br>Hughes 2019a                                                                                                                                                                 | randomised trial | serious      | not assessable | not serious  | very serious <sup>a,b</sup> | none                 | 12             | 12     | SMD 1.6 higher<br>(0.66 higher to 2.54 higher)                                 |                   | ⊕○○○<br>Very low | IMPORTANT  |
| <b>Laxity</b>                                                                                                                                                                     |                  |              |                |              |                             |                      |                |        |                                                                                |                   |                  |            |
| 2                                                                                                                                                                                 |                  |              |                |              |                             |                      |                |        |                                                                                |                   |                  |            |
| <b>Laxity (Knee ligament laxity (mm) using the KT-1000 arthrometer; reported as difference from pre-intervention values; better indicated by higher values – 2 months post-op</b> |                  |              |                |              |                             |                      |                |        |                                                                                |                   |                  |            |
| 1<br>Hughes 2019a                                                                                                                                                                 | randomised trial | serious      | not assessable | not serious  | very serious <sup>a,b</sup> | none                 | 12             | 12     | SMD 0<br>(0.8 lower to 0.8 higher)                                             |                   | ⊕○○○<br>Very low | CRITICAL   |
| <b>Laxity (Knee ligament laxity (mm) using the KT-2000 arthrometer; better indicated by lower values – 4 months post-op</b>                                                       |                  |              |                |              |                             |                      |                |        |                                                                                |                   |                  |            |
| 1<br>Ohta 2003                                                                                                                                                                    | randomised trial | very serious | not assessable | not serious  | very serious <sup>a,b</sup> | none                 | 22             | 22     | SMD 0<br>(0.59 lower to 0.59 higher)                                           |                   | ⊕○○○<br>Very low | CRITICAL   |
| <b>Swelling</b>                                                                                                                                                                   |                  |              |                |              |                             |                      |                |        |                                                                                |                   |                  |            |
| 1                                                                                                                                                                                 |                  |              |                |              |                             |                      |                |        |                                                                                |                   |                  |            |
| <b>Swelling - reported as difference from pre-intervention values (better indicated by lower values) – 2 months post-op</b>                                                       |                  |              |                |              |                             |                      |                |        |                                                                                |                   |                  |            |
| 1<br>Hughes 2019a                                                                                                                                                                 | randomised trial | serious      | not assessable | not serious  | very serious <sup>a,b</sup> | none                 | 12             | 12     | SMD 1.56 lower<br>(2.49 lower to 0.62 lower)                                   |                   | ⊕○○○<br>Very low | CRITICAL   |
| <b>Adverse events</b>                                                                                                                                                             |                  |              |                |              |                             |                      |                |        |                                                                                |                   |                  |            |
| Ohta 2003                                                                                                                                                                         |                  |              |                |              |                             |                      |                |        | 2 patients dropped out because of discomfort or a dull pain in the lower limb. |                   |                  | CRITICAL   |
| Iversen 2016                                                                                                                                                                      |                  |              |                |              |                             |                      |                |        | None reported                                                                  |                   |                  | CRITICAL   |
| Hughes 2018                                                                                                                                                                       |                  |              |                |              |                             |                      |                |        | None reported                                                                  |                   |                  | CRITICAL   |
| Hughes 2019a                                                                                                                                                                      |                  |              |                |              |                             |                      |                |        | None reported                                                                  |                   |                  | CRITICAL   |
| Hughes 2019b                                                                                                                                                                      |                  |              |                |              |                             |                      |                |        | None reported                                                                  |                   |                  | CRITICAL   |
| Curran 2020                                                                                                                                                                       |                  |              |                |              |                             |                      |                |        | None reported                                                                  |                   |                  | CRITICAL   |

CI: confidence interval; SMD: standardised mean difference

- a. Total participants <800  
b. 95% CI of an SMD extends > 0.5 points in either direction

## Blood flow restriction (BFR) pre-operatively versus no BFR in rehabilitation after ACLR

Bibliography: Grapar Zargi 2016, Zargi 2018

| Certainty assessment                                                                                                                               |                  |              |                |              |                             |                      | No of patients |        | Effect                                          |                   | Certainty | Importance |
|----------------------------------------------------------------------------------------------------------------------------------------------------|------------------|--------------|----------------|--------------|-----------------------------|----------------------|----------------|--------|-------------------------------------------------|-------------------|-----------|------------|
| No of studies                                                                                                                                      | Study design     | Risk of bias | Inconsistency  | Indirectness | Imprecision                 | Other considerations | BFR            | no BFR | Relative (95% CI)                               | Absolute (95% CI) |           |            |
| <b>Strength</b>                                                                                                                                    |                  |              |                |              |                             |                      |                |        |                                                 |                   |           |            |
| 2                                                                                                                                                  |                  |              |                |              |                             |                      |                |        |                                                 |                   |           |            |
| <b>Strength Quadriceps ISOM 60° (better indicated by higher values) – 3 months post-op</b>                                                         |                  |              |                |              |                             |                      |                |        |                                                 |                   |           |            |
| 1                                                                                                                                                  | randomised trial | very serious | not assessable | not serious  | very serious <sup>a,b</sup> | none                 | 10             | 10     | SMD 0.41 higher<br>(0.21 lower to 1.04 higher)  | ⊕○○○<br>Very low  |           | CRITICAL   |
| <b>Muscle endurance - Time of contraction (s) – 3 months post-op</b>                                                                               |                  |              |                |              |                             |                      |                |        |                                                 |                   |           |            |
| 1                                                                                                                                                  | randomised trial | serious      | not assessable | not serious  | very serious <sup>a,b</sup> | none                 | 10             | 10     | SMD 0.14 higher<br>(0.74 lower to 1.02 higher)  | ⊕○○○<br>Very low  |           | CRITICAL   |
| <b>Atrophy</b>                                                                                                                                     |                  |              |                |              |                             |                      |                |        |                                                 |                   |           |            |
| 1                                                                                                                                                  |                  |              |                |              |                             |                      |                |        |                                                 |                   |           |            |
| <b>Atrophy - Rectus femoris muscle volume (cm<sup>3</sup>) using MRI (better indicated by higher values) – 1 month post-op</b>                     |                  |              |                |              |                             |                      |                |        |                                                 |                   |           |            |
| 1                                                                                                                                                  | randomised trial | very serious | not assessable | not serious  | very serious <sup>a,b</sup> | none                 | 10             | 10     | SMD 1.07 higher<br>(0.12 higher to 2.02 higher) | ⊕○○○<br>Very low  |           | CRITICAL   |
| <b>Atrophy - Rectus femoris muscle volume (cm<sup>3</sup>) using MRI (better indicated by higher values) – 3 months post-op</b>                    |                  |              |                |              |                             |                      |                |        |                                                 |                   |           |            |
| 1                                                                                                                                                  | randomised trial | very serious | not assessable | not serious  | very serious <sup>a,b</sup> | none                 | 10             | 10     | SMD 0.97 higher<br>(0.03 higher to 1.91 higher) | ⊕○○○<br>Very low  |           | CRITICAL   |
| <b>Atrophy - Vastii muscle volume (cm<sup>3</sup>) using MRI (better indicated by higher values) – 1 month post-op</b>                             |                  |              |                |              |                             |                      |                |        |                                                 |                   |           |            |
| 1                                                                                                                                                  | randomised trial | very serious | not assessable | not serious  | very serious <sup>a,b</sup> | none                 | 10             | 10     | SMD 0.38 higher<br>(0.51 lower to 1.26 higher)  | ⊕○○○<br>Very low  |           | CRITICAL   |
| <b>Atrophy - Vastii muscle volume (cm<sup>3</sup>) using MRI (better indicated by higher values) – 3 months post-op</b>                            |                  |              |                |              |                             |                      |                |        |                                                 |                   |           |            |
| 1                                                                                                                                                  | randomised trial | very serious | not assessable | not serious  | very serious <sup>a,b</sup> | none                 | 10             | 10     | SMD 0.35 higher<br>(0.54 lower to 1.23 higher)  | ⊕○○○<br>Very low  |           | CRITICAL   |
| <b>Balance</b>                                                                                                                                     |                  |              |                |              |                             |                      |                |        |                                                 |                   |           |            |
| 1                                                                                                                                                  |                  |              |                |              |                             |                      |                |        |                                                 |                   |           |            |
| <b>Balance - Star excursion balance test anterior deficit (cm) compared to the uninjured (better indicated by lower values) – 3 months post-op</b> |                  |              |                |              |                             |                      |                |        |                                                 |                   |           |            |
| 1                                                                                                                                                  | randomised trial | very serious | not assessable | not serious  | very serious <sup>a,b</sup> | none                 | 10             | 10     | SMD 0.23 lower<br>(1.11 lower to 0.65 higher)   | ⊕○○○<br>Very low  |           | IMPORTANT  |
| <b>Adverse events</b>                                                                                                                              |                  |              |                |              |                             |                      |                |        |                                                 |                   |           |            |
| Grapar Zargi 2016                                                                                                                                  |                  |              |                |              |                             |                      |                |        | None reported                                   |                   |           | CRITICAL   |
| Zargi 2018                                                                                                                                         |                  |              |                |              |                             |                      |                |        | None reported                                   |                   |           | CRITICAL   |

CI: confidence interval; SMD: standardised mean difference

a. Total participants &lt;800

b. 95% CI of an SMD extends &gt; 0.5 points in either direction

## Kinesio-tape versus no kinesio-tape in rehabilitation after ACLR

Bibliography: Boguszewski 2013, Balki 2016, Oliveira 2016, Balki 2019, Chan 2017, Gholami 2020

| Certainty assessment                                                                                |                   |              |                |              |                              |                      | No of patients |                 | Effect                                                                                                     |                   | Certainty | Importance |
|-----------------------------------------------------------------------------------------------------|-------------------|--------------|----------------|--------------|------------------------------|----------------------|----------------|-----------------|------------------------------------------------------------------------------------------------------------|-------------------|-----------|------------|
| No of studies                                                                                       | Study design      | Risk of bias | Inconsistency  | Indirectness | Imprecision                  | Other considerations | Kinesio-tape   | No kinesio-tape | Relative (95% CI)                                                                                          | Absolute (95% CI) |           |            |
| <b>Pain</b>                                                                                         |                   |              |                |              |                              |                      |                |                 |                                                                                                            |                   |           |            |
| 3                                                                                                   |                   |              |                |              |                              |                      |                |                 |                                                                                                            |                   |           |            |
| <b>Pain – VAS scale (better indicated by lower values) – 2 weeks post-op</b>                        |                   |              |                |              |                              |                      |                |                 |                                                                                                            |                   |           |            |
| 1<br>Chan 2017                                                                                      | randomised trial  | very serious | not assessable | not serious  | very serious <sup>a, b</sup> | none                 | 30             | 30              | SMD 0.63 lower<br>(1.15 lower to 0.11 lower)                                                               | ⊕○○○<br>Very low  |           | CRITICAL   |
| Balki 2016                                                                                          | randomised trial  | very serious | not assessable | not serious  | very serious <sup>a, c</sup> | none                 | 15             | 15              | The authors report significant decrease in pain intensity in the intervention group.                       | ⊕○○○<br>Very low  |           | CRITICAL   |
| <b>Pain - VAS scale (better indicated by lower values) – 4-6 weeks post-op</b>                      |                   |              |                |              |                              |                      |                |                 |                                                                                                            |                   |           |            |
| 1<br>Chan 2017                                                                                      | randomised trials | very serious | not assessable | not serious  | very serious <sup>a, b</sup> | none                 | 30             | 30              | SMD 0.31 higher<br>(0.2 lower to 0.82 higher)                                                              | ⊕○○○<br>Very low  |           | CRITICAL   |
| Boguszewski 2013                                                                                    | randomised trials | very serious | not assessable | not serious  | very serious <sup>c</sup>    | none                 | NR             | NR              | SDs are not reported. The authors report significant decrease in pain intensity in the intervention group. | ⊕○○○<br>Very low  |           | CRITICAL   |
| <b>Swelling</b>                                                                                     |                   |              |                |              |                              |                      |                |                 |                                                                                                            |                   |           |            |
| 3                                                                                                   |                   |              |                |              |                              |                      |                |                 |                                                                                                            |                   |           |            |
| <b>Swelling - (better indicated by lower values) – 2 weeks post-op</b>                              |                   |              |                |              |                              |                      |                |                 |                                                                                                            |                   |           |            |
| 1<br>Chan 2017                                                                                      | randomised trials | very serious | not assessable | not serious  | serious <sup>a</sup>         | none                 | 30             | 30              | SMD 0.02 higher<br>(0.49 lower to 0.52 higher)                                                             | ⊕○○○<br>Very low  |           | CRITICAL   |
| Balki 2016                                                                                          | randomised trials | very serious | not assessable | not serious  | very serious <sup>a, c</sup> | none                 | 15             | 15              | Authors reported significant improvement in swelling in the experimental group.                            | ⊕○○○<br>Very low  |           | CRITICAL   |
| <b>Swelling - (better indicated by lower values) – 4 weeks post-op</b>                              |                   |              |                |              |                              |                      |                |                 |                                                                                                            |                   |           |            |
| 1<br>Boguszewski 2013                                                                               | randomised trial  | very serious | not assessable | not serious  | very serious <sup>a, c</sup> | none                 | NR             | NR              | SDs are not reported. The authors report significant decrease in swelling in the intervention group.       | ⊕○○○<br>Very low  |           | CRITICAL   |
| <b>Swelling - (better indicated by lower values) – 6 weeks post-op</b>                              |                   |              |                |              |                              |                      |                |                 |                                                                                                            |                   |           |            |
| 1<br>Chan 2017                                                                                      | randomised trial  | very serious | not assessable | not serious  | serious <sup>a</sup>         | none                 | 30             | 30              | SMD 0.17 lower<br>(0.67 lower to 0.34 higher)                                                              | ⊕○○○<br>Very low  |           | CRITICAL   |
| <b>Strength</b>                                                                                     |                   |              |                |              |                              |                      |                |                 |                                                                                                            |                   |           |            |
| 3                                                                                                   |                   |              |                |              |                              |                      |                |                 |                                                                                                            |                   |           |            |
| <b>Strength - Quadriceps ISOM 30° (better indicated by higher values) – 9 days post-op</b>          |                   |              |                |              |                              |                      |                |                 |                                                                                                            |                   |           |            |
| 1<br>Balki 2016                                                                                     | randomised trial  | very serious | not assessable | not serious  | very serious <sup>a, b</sup> | none                 | 15             | 15              | SMD 0.36 higher<br>(0.36 lower to 1.08 higher)                                                             | ⊕○○○<br>Very low  |           | IMPORTANT  |
| <b>Strength - Quadriceps ISOM 30° (better indicated by higher values) – 2 weeks post-op</b>         |                   |              |                |              |                              |                      |                |                 |                                                                                                            |                   |           |            |
| 1<br>Balki 2016                                                                                     | randomised trial  | very serious | not assessable | not serious  | very serious <sup>a, b</sup> | none                 | 15             | 15              | SMD 0.48 higher<br>(0.25 lower to 1.2 higher)                                                              | ⊕○○○<br>Very low  |           | IMPORTANT  |
| <b>Strength - Quadriceps CON 60°/s (better indicated by higher values) – 4 months post-op</b>       |                   |              |                |              |                              |                      |                |                 |                                                                                                            |                   |           |            |
| 1<br>Oliveira 2016                                                                                  | randomised trial  | very serious | not assessable | not serious  | very serious <sup>a, b</sup> | none                 | 15             | 15              | SMD 0.63 lower<br>(1.36 lower to 0.11 higher)                                                              | ⊕○○○<br>Very low  |           | IMPORTANT  |
| <b>Strength - Quadriceps ECC 60°/s (better indicated by higher values) – 4 months post-op</b>       |                   |              |                |              |                              |                      |                |                 |                                                                                                            |                   |           |            |
| 1<br>Oliveira 2016                                                                                  | randomised trial  | very serious | not assessable | not serious  | very serious <sup>a, b</sup> | none                 | 15             | 15              | SMD 0.74 lower<br>(1.48 lower to 0 )                                                                       | ⊕○○○<br>Very low  |           | IMPORTANT  |
| <b>Strength - Quadriceps power CON 60°/s (better indicated by higher values) – 4 months post-op</b> |                   |              |                |              |                              |                      |                |                 |                                                                                                            |                   |           |            |
| 1<br>Oliveira 2016                                                                                  | randomised trial  | very serious | not assessable | not serious  | very serious <sup>a, b</sup> | none                 | 15             | 15              | SMD 0.76 lower<br>(1.5 lower to 0.02 lower)                                                                | ⊕○○○<br>Very low  |           | IMPORTANT  |

| Certainty assessment                                                                                |                   |              |                                      |              |                              |                      | No of patients |                 | Effect                                                                                                                                              |                   | Certainty        | Importance |
|-----------------------------------------------------------------------------------------------------|-------------------|--------------|--------------------------------------|--------------|------------------------------|----------------------|----------------|-----------------|-----------------------------------------------------------------------------------------------------------------------------------------------------|-------------------|------------------|------------|
| No of studies                                                                                       | Study design      | Risk of bias | Inconsistency                        | Indirectness | Imprecision                  | Other considerations | Kinesio-tape   | No kinesio-tape | Relative (95% CI)                                                                                                                                   | Absolute (95% CI) |                  |            |
| <b>Strength - Quadriceps power ECC 60°/s (better indicated by higher values) – 4 months post-op</b> |                   |              |                                      |              |                              |                      |                |                 |                                                                                                                                                     |                   |                  |            |
| 1<br>Oliveira 2016                                                                                  | randomised trial  | very serious | not assessable                       | not serious  | very serious <sup>a, b</sup> | none                 | 15             | 15              | SMD 0.71 lower<br>(1.45 lower to 0.03 higher)                                                                                                       |                   | ⊕○○○<br>Very low | IMPORTANT  |
| <b>Strength - Hamstring ISOM 30° (better indicated by higher values) – 9 days post-op</b>           |                   |              |                                      |              |                              |                      |                |                 |                                                                                                                                                     |                   |                  |            |
| 1<br>Balki 2016                                                                                     | randomised trial  | very serious | not assessable                       | not serious  | very serious <sup>a, b</sup> | none                 | 15             | 15              | SMD 0.79 higher<br>(0.05 higher to 1.54 higher)                                                                                                     |                   | ⊕○○○<br>Very low | IMPORTANT  |
| <b>Strength - Hamstring ISOM 30° (better indicated by higher values) – 2 weeks post-op</b>          |                   |              |                                      |              |                              |                      |                |                 |                                                                                                                                                     |                   |                  |            |
| 1<br>Balki 2016                                                                                     | randomised trial  | very serious | not assessable                       | not serious  | very serious <sup>a, b</sup> | none                 | 15             | 15              | SMD 1.01 higher<br>(0.24 higher to 1.78 higher)                                                                                                     |                   | ⊕○○○<br>Very low | IMPORTANT  |
| <b>Strength - Hip flexion ISOM 30° (better indicated by higher values) – 9 days post-op</b>         |                   |              |                                      |              |                              |                      |                |                 |                                                                                                                                                     |                   |                  |            |
| 1<br>Balki 2019                                                                                     | randomised trial  | very serious | not assessable                       | not serious  | very serious <sup>a, b</sup> | none                 | 13             | 13              | SMD 0.58 higher<br>(0.21 lower to 1.37 higher)                                                                                                      |                   | ⊕○○○<br>Very low | IMPORTANT  |
| <b>Strength - Hip extension ISOM 30° (better indicated by higher values) – 9 days post-op</b>       |                   |              |                                      |              |                              |                      |                |                 |                                                                                                                                                     |                   |                  |            |
| 1<br>Balki 2019                                                                                     | randomised trial  | very serious | not assessable                       | not serious  | very serious <sup>a, b</sup> | none                 | 13             | 13              | SMD 0.55 higher<br>(0.24 lower to 1.33 higher)                                                                                                      |                   | ⊕○○○<br>Very low | IMPORTANT  |
| <b>Strength - Hip abductors ISOM 20° (better indicated by higher values) – 9 days post-op</b>       |                   |              |                                      |              |                              |                      |                |                 |                                                                                                                                                     |                   |                  |            |
| 1<br>Balki 2019                                                                                     | randomised trial  | very serious | not assessable                       | not serious  | very serious <sup>a, b</sup> | none                 | 13             | 13              | SMD 0.55 higher<br>(0.24 lower to 1.33 higher)                                                                                                      |                   | ⊕○○○<br>Very low | IMPORTANT  |
| <b>Strength - Hip adductors ISOM 0° (better indicated by higher values) – 9 days post-op</b>        |                   |              |                                      |              |                              |                      |                |                 |                                                                                                                                                     |                   |                  |            |
| 1<br>Balki 2019                                                                                     | randomised trial  | very serious | not assessable                       | not serious  | very serious <sup>a, b</sup> | none                 | 13             | 13              | SMD 0.99 higher<br>(0.17 higher to 1.81 higher)                                                                                                     |                   | ⊕○○○<br>Very low | IMPORTANT  |
| <b>Strength - Hip flexion ISOM30° (better indicated by higher values) – 2 weeks post-op</b>         |                   |              |                                      |              |                              |                      |                |                 |                                                                                                                                                     |                   |                  |            |
| 1<br>Balki 2019                                                                                     | randomised trial  | very serious | not assessable                       | not serious  | very serious <sup>a, b</sup> | none                 | 13             | 13              | SMD 0.89 higher<br>(0.08 higher to 1.71 higher)                                                                                                     |                   | ⊕○○○<br>Very low | IMPORTANT  |
| <b>Strength - Hip extension ISOM 30° (better indicated by higher values) – 2 weeks post-op</b>      |                   |              |                                      |              |                              |                      |                |                 |                                                                                                                                                     |                   |                  |            |
| 1<br>Balki 2019                                                                                     | randomised trial  | very serious | not assessable                       | not serious  | very serious <sup>a, b</sup> | none                 | 13             | 13              | SMD 0.78 higher<br>(0.03 lower to 1.58 higher)                                                                                                      |                   | ⊕○○○<br>Very low | IMPORTANT  |
| <b>Strength - Hip abductors ISOM 20° (better indicated by higher values) – 2 weeks post-op</b>      |                   |              |                                      |              |                              |                      |                |                 |                                                                                                                                                     |                   |                  |            |
| 1<br>Balki 2019                                                                                     | randomised trial  | very serious | not assessable                       | not serious  | very serious <sup>a, b</sup> | none                 | 13             | 13              | SMD 0.64 higher<br>(0.15 lower to 1.43 higher)                                                                                                      |                   | ⊕○○○<br>Very low | IMPORTANT  |
| <b>Strength - Hip adductors ISOM 0° (better indicated by higher values) – 2 weeks post-op</b>       |                   |              |                                      |              |                              |                      |                |                 |                                                                                                                                                     |                   |                  |            |
| 1<br>Balki 2019                                                                                     | randomised trial  | very serious | not assessable                       | not serious  | very serious <sup>a, b</sup> | none                 | 13             | 13              | SMD 1.17 higher<br>(0.32 higher to 2.01 higher)                                                                                                     |                   | ⊕○○○<br>Very low | IMPORTANT  |
| <b>Range of motion (ROM)</b>                                                                        |                   |              |                                      |              |                              |                      |                |                 |                                                                                                                                                     |                   |                  |            |
| 3                                                                                                   |                   |              |                                      |              |                              |                      |                |                 |                                                                                                                                                     |                   |                  |            |
| <b>ROM - knee flexion (better indicated by higher values) – 9 days post-op</b>                      |                   |              |                                      |              |                              |                      |                |                 |                                                                                                                                                     |                   |                  |            |
| 1<br>Balki 2016                                                                                     | randomised trial  | very serious | not assessable                       | not serious  | very serious <sup>a, b</sup> | none                 | 15             | 15              | SMD 0.72 higher<br>(0.02 lower to 1.46 higher)                                                                                                      |                   | ⊕○○○<br>Very low | CRITICAL   |
| <b>ROM - knee flexion (better indicated by higher values) – 2 weeks post-op</b>                     |                   |              |                                      |              |                              |                      |                |                 |                                                                                                                                                     |                   |                  |            |
| 2<br>Balki 2016<br>Chan 2017                                                                        | randomised trials | very serious | very serious<br><sup>I</sup> ² = 88% | not serious  | very serious <sup>a, b</sup> | none                 | 45             | 45              | SMD 0.6 higher<br>(0.75 lower to 1.95 higher)                                                                                                       |                   | ⊕○○○<br>Very low | CRITICAL   |
| <b>ROM - knee flexion (better indicated by higher values) – 4-6 weeks post-op</b>                   |                   |              |                                      |              |                              |                      |                |                 |                                                                                                                                                     |                   |                  |            |
| 1<br>Chan 2017                                                                                      | randomised trial  | very serious | not assessable                       | not serious  | very serious <sup>a, b</sup> | none                 | 30             | 30              | SMD 0.26 lower<br>(0.77 lower to 0.24 higher)                                                                                                       |                   | ⊕○○○<br>Very low | CRITICAL   |
| 1<br>Boguszewski 2013                                                                               | randomised trial  | very serious | not assessable                       | not serious  | very serious <sup>c</sup>    | none                 | NR             | NR              | SDs are not reported. The authors reported significantly better results in the experimental group in measurements 2 and 3 compared to the controls. |                   | ⊕○○○<br>Very low | CRITICAL   |
| <b>ROM - knee extension deficit (better indicated by lower values) – 9 days post-op</b>             |                   |              |                                      |              |                              |                      |                |                 |                                                                                                                                                     |                   |                  |            |

| Certainty assessment                                                                                                                          |                   |              |                                          |              |                              |                      | No of patients |                 | Effect                                                                                                                                                                                                                                               |                   | Certainty        | Importance |
|-----------------------------------------------------------------------------------------------------------------------------------------------|-------------------|--------------|------------------------------------------|--------------|------------------------------|----------------------|----------------|-----------------|------------------------------------------------------------------------------------------------------------------------------------------------------------------------------------------------------------------------------------------------------|-------------------|------------------|------------|
| No of studies                                                                                                                                 | Study design      | Risk of bias | Inconsistency                            | Indirectness | Imprecision                  | Other considerations | Kinesio-tape   | No kinesio-tape | Relative (95% CI)                                                                                                                                                                                                                                    | Absolute (95% CI) |                  |            |
| 1<br>Balki 2016                                                                                                                               | randomised trial  | very serious | not assessable                           | not serious  | very serious <sup>a, b</sup> | none                 | 15             | 15              | SMD 0.24 higher<br>(0.48 lower to 0.96 higher)                                                                                                                                                                                                       |                   | ⊕○○○<br>Very low | CRITICAL   |
| <b>ROM - knee extension deficit (better indicated by lower values) – 2 weeks post-op</b>                                                      |                   |              |                                          |              |                              |                      |                |                 |                                                                                                                                                                                                                                                      |                   |                  |            |
| 1<br>Balki 2016                                                                                                                               | randomised trial  | very serious | not assessable                           | not serious  | very serious <sup>a, b</sup> | none                 | 15             | 15              | SMD 0.21 higher<br>(0.51 lower to 0.93 higher)                                                                                                                                                                                                       |                   | ⊕○○○<br>Very low | CRITICAL   |
| <b>ROM - knee extension – 1 month post-op</b>                                                                                                 |                   |              |                                          |              |                              |                      |                |                 |                                                                                                                                                                                                                                                      |                   |                  |            |
| 1<br>Boguszewski 2013                                                                                                                         | randomised trial  | very serious | not assessable                           | not serious  | very serious <sup>c</sup>    | none                 | NR             | NR              | SDs are not reported. The authors reported significantly better results in the experimental group in measurements 2 and 3 compared to the controls. The full range of knee extension was regained faster among patients from the experimental group. |                   | ⊕○○○<br>Very low | CRITICAL   |
| <b>Patient reported outcomes (PROM)</b>                                                                                                       |                   |              |                                          |              |                              |                      |                |                 |                                                                                                                                                                                                                                                      |                   |                  |            |
| 3                                                                                                                                             |                   |              |                                          |              |                              |                      |                |                 |                                                                                                                                                                                                                                                      |                   |                  |            |
| <b>PROM - Lysholm (better indicated by higher values) – 2 weeks post-op</b>                                                                   |                   |              |                                          |              |                              |                      |                |                 |                                                                                                                                                                                                                                                      |                   |                  |            |
| 1<br>Chan 2017                                                                                                                                | randomised trial  | very serious | not assessable                           | not serious  | very serious <sup>a, b</sup> | none                 | 30             | 30              | SMD 0.21 higher<br>(0.3 lower to 0.72 higher)                                                                                                                                                                                                        |                   | ⊕○○○<br>Very low | CRITICAL   |
| <b>PROM - Lysholm (better indicated by higher values) – 4-6 weeks post-op</b>                                                                 |                   |              |                                          |              |                              |                      |                |                 |                                                                                                                                                                                                                                                      |                   |                  |            |
| 2<br>Balki 2016<br>Chan 2017                                                                                                                  | randomised trials | very serious | not serious<br><i>I<sup>2</sup> = 0%</i> | not serious  | serious <sup>a</sup>         | none                 | 45             | 45              | SMD 0.15 lower<br>(0.56 lower to 0.26 higher)                                                                                                                                                                                                        |                   | ⊕○○○<br>Very low | CRITICAL   |
| <b>PROM - Lysholm (better indicated by higher values) – 3 months post-op</b>                                                                  |                   |              |                                          |              |                              |                      |                |                 |                                                                                                                                                                                                                                                      |                   |                  |            |
| 1<br>Balki 2016                                                                                                                               | randomised trial  | very serious | not assessable                           | not serious  | very serious <sup>a, b</sup> | none                 | 15             | 15              | SMD 0.29 lower<br>(1.01 lower to 0.43 higher)                                                                                                                                                                                                        |                   | ⊕○○○<br>Very low | CRITICAL   |
| <b>PROM - modified Cincinnati (better indicated by higher values) – 1 month post-op</b>                                                       |                   |              |                                          |              |                              |                      |                |                 |                                                                                                                                                                                                                                                      |                   |                  |            |
| 1<br>Balki 2016                                                                                                                               | randomised trial  | very serious | not assessable                           | not serious  | very serious <sup>a, b</sup> | none                 | 15             | 15              | SMD 0.61 lower<br>(1.35 lower to 0.12 higher)                                                                                                                                                                                                        |                   | ⊕○○○<br>Very low | CRITICAL   |
| <b>PROM - modified Cincinnati (better indicated by higher values) – 3 months post-op</b>                                                      |                   |              |                                          |              |                              |                      |                |                 |                                                                                                                                                                                                                                                      |                   |                  |            |
| 1<br>Balki 2016                                                                                                                               | randomised trial  | very serious | not assessable                           | not serious  | very serious <sup>a, b</sup> | none                 | 15             | 15              | SMD 0.42 higher<br>(0.31 lower to 1.14 higher)                                                                                                                                                                                                       |                   | ⊕○○○<br>Very low | CRITICAL   |
| <b>PROM - Tegner (better indicated by higher values) – 1 month post-op</b>                                                                    |                   |              |                                          |              |                              |                      |                |                 |                                                                                                                                                                                                                                                      |                   |                  |            |
| 1<br>Balki 2016                                                                                                                               | randomised trial  | very serious | not assessable                           | not serious  | very serious <sup>a, b</sup> | none                 | 15             | 15              | SMD 0.12 higher<br>(0.6 lower to 0.84 higher)                                                                                                                                                                                                        |                   | ⊕○○○<br>Very low | CRITICAL   |
| <b>PROM - Tegner (better indicated by higher values) – 3 months post-op</b>                                                                   |                   |              |                                          |              |                              |                      |                |                 |                                                                                                                                                                                                                                                      |                   |                  |            |
| 1<br>Balki 2016                                                                                                                               | randomised trial  | very serious | not assessable                           | not serious  | very serious <sup>a, b</sup> | none                 | 15             | 15              | SMD 0.17 lower<br>(0.88 lower to 0.55 higher)                                                                                                                                                                                                        |                   | ⊕○○○<br>Very low | CRITICAL   |
| <b>PROM - Kinesiophobia-Tampa (better indicated by lower values) –at the time to return to sport after 10min of kinesio-tape application</b>  |                   |              |                                          |              |                              |                      |                |                 |                                                                                                                                                                                                                                                      |                   |                  |            |
| 1<br>Gholami 2020                                                                                                                             | randomised trial  | serious      | not assessable                           | not serious  | very serious <sup>a, b</sup> | none                 | 10             | 10              | SMD 0.76 lower<br>(1.67 lower to 0.16 higher)                                                                                                                                                                                                        |                   | ⊕○○○<br>Very low | CRITICAL   |
| <b>PROM - Kinesiophobia-Tampa (better indicated by lower values) –at the time to return to sport after 2 days of kinesio-tape application</b> |                   |              |                                          |              |                              |                      |                |                 |                                                                                                                                                                                                                                                      |                   |                  |            |
| 1<br>Gholami 2020                                                                                                                             | randomised trial  | serious      | not assessable                           | not serious  | very serious <sup>a, b</sup> | none                 | 10             | 10              | SMD 1.06 lower<br>(2.01 lower to 0.11 lower)                                                                                                                                                                                                         |                   | ⊕○○○<br>Very low | CRITICAL   |
| <b>Balance</b>                                                                                                                                |                   |              |                                          |              |                              |                      |                |                 |                                                                                                                                                                                                                                                      |                   |                  |            |
| 2                                                                                                                                             |                   |              |                                          |              |                              |                      |                |                 |                                                                                                                                                                                                                                                      |                   |                  |            |
| <b>Balance - postural balance antero-posterior (mm) (better indicated by lower values) – 4 months post-op</b>                                 |                   |              |                                          |              |                              |                      |                |                 |                                                                                                                                                                                                                                                      |                   |                  |            |
| 1<br>Oliveira 2016                                                                                                                            | randomised trial  | very serious | not assessable                           | not serious  | very serious <sup>a, b</sup> | none                 | 15             | 15              | SMD 0.45 lower<br>(1.18 lower to 0.27 higher)                                                                                                                                                                                                        |                   | ⊕○○○<br>Very low | IMPORTANT  |
| <b>Balance - postural balance latero-lateral (mm) (better indicated by lower values) – 4 months post-op</b>                                   |                   |              |                                          |              |                              |                      |                |                 |                                                                                                                                                                                                                                                      |                   |                  |            |

| Certainty assessment                                                                                                                                                 |                  |                  |               |                |             |                              | No of patients |                 | Effect            |                                                                                                                                    | Certainty        | Importance |
|----------------------------------------------------------------------------------------------------------------------------------------------------------------------|------------------|------------------|---------------|----------------|-------------|------------------------------|----------------|-----------------|-------------------|------------------------------------------------------------------------------------------------------------------------------------|------------------|------------|
| No of studies                                                                                                                                                        | Study design     | Risk of bias     | Inconsistency | Indirectness   | Imprecision | Other considerations         | Kinesio-tape   | No kinesio-tape | Relative (95% CI) | Absolute (95% CI)                                                                                                                  |                  |            |
| 1                                                                                                                                                                    | Oliveira 2016    | randomised trial | very serious  | not assessable | not serious | very serious <sup>a, b</sup> | none           | 15              | 15                | SMD 0.33 lower<br>(1.05 lower to 0.39 higher)                                                                                      | ⊕○○○<br>Very low | IMPORTANT  |
| <b>Balance - Y balance test (Anterior reach) (better indicated by higher values) –at the time to return to sport after 10min of kinesio-tape application</b>         |                  |                  |               |                |             |                              |                |                 |                   |                                                                                                                                    |                  |            |
| 1                                                                                                                                                                    | Gholami 2020     | randomised trial | serious       | not assessable | not serious | very serious <sup>a, b</sup> | none           | 10              | 10                | SMD 0.62 higher<br>(0.28 lower to 1.52 higher)                                                                                     | ⊕○○○<br>Very low | IMPORTANT  |
| <b>Balance - Y balance test (Posteromedial reach) (better indicated by higher values) –at the time to return to sport after 10min of kinesio-tape application</b>    |                  |                  |               |                |             |                              |                |                 |                   |                                                                                                                                    |                  |            |
| 1                                                                                                                                                                    | Gholami 2020     | randomised trial | serious       | not assessable | not serious | very serious <sup>a, b</sup> | none           | 10              | 10                | SMD 0.22 lower<br>(1.1 lower to 0.66 higher)                                                                                       | ⊕○○○<br>Very low | IMPORTANT  |
| <b>Balance - Y balance test (Postero-lateral reach) (better indicated by higher values) –at the time to return to sport after 10min of kinesio-tape application</b>  |                  |                  |               |                |             |                              |                |                 |                   |                                                                                                                                    |                  |            |
| 1                                                                                                                                                                    | Gholami 2020     | randomised trial | serious       | not assessable | not serious | very serious <sup>a, b</sup> | none           | 10              | 10                | SMD 0.01 lower<br>(0.89 lower to 0.87 higher)                                                                                      | ⊕○○○<br>Very low | IMPORTANT  |
| <b>Balance - Y balance test (Anterior reach) (better indicated by higher values) –at the time to return to sport after 2 days of kinesio-tape application</b>        |                  |                  |               |                |             |                              |                |                 |                   |                                                                                                                                    |                  |            |
| 1                                                                                                                                                                    | Gholami 2020     | randomised trial | serious       | not assessable | not serious | very serious <sup>a, b</sup> | none           | 10              | 10                | SMD 0.01 higher<br>(0.86 lower to 0.89 higher)                                                                                     | ⊕○○○<br>Very low | IMPORTANT  |
| <b>Balance - Y balance test (Posteromedial reach) (better indicated by higher values) –at the time to return to sport after 2 days of kinesio-tape application</b>   |                  |                  |               |                |             |                              |                |                 |                   |                                                                                                                                    |                  |            |
| 1                                                                                                                                                                    | Gholami 2020     | randomised trial | serious       | not assessable | not serious | very serious <sup>a, b</sup> | none           | 10              | 10                | SMD 0<br>(0.88 lower to 0.88 higher)                                                                                               | ⊕○○○<br>Very low | IMPORTANT  |
| <b>Balance - Y balance test (Postero-lateral reach) (better indicated by higher values) –at the time to return to sport after 2 days of kinesio-tape application</b> |                  |                  |               |                |             |                              |                |                 |                   |                                                                                                                                    |                  |            |
| 1                                                                                                                                                                    | Gholami 2020     | randomised trial | serious       | not assessable | not serious | very serious <sup>a, b</sup> | none           | 10              | 10                | SMD 0.21 higher<br>(0.67 lower to 1.09 higher)                                                                                     | ⊕○○○<br>Very low | IMPORTANT  |
| <b>Atrophy</b>                                                                                                                                                       |                  |                  |               |                |             |                              |                |                 |                   |                                                                                                                                    |                  |            |
| 1                                                                                                                                                                    |                  |                  |               |                |             |                              |                |                 |                   |                                                                                                                                    |                  |            |
| <b>Atrophy - femoral measurement II - 10cm above patella – 1 month post-op</b>                                                                                       |                  |                  |               |                |             |                              |                |                 |                   |                                                                                                                                    |                  |            |
| 1                                                                                                                                                                    | Boguszewski 2013 | randomised trial | very serious  | not assessable | not serious | very serious <sup>c</sup>    | none           | NR              | NR                | SDs are not reported. The authors reported that "patients from the experimental group regained their muscle mass slightly faster". | ⊕○○○<br>Very low | IMPORTANT  |
| <b>Functional</b>                                                                                                                                                    |                  |                  |               |                |             |                              |                |                 |                   |                                                                                                                                    |                  |            |
| 1                                                                                                                                                                    |                  |                  |               |                |             |                              |                |                 |                   |                                                                                                                                    |                  |            |
| <b>Functional - single leg hop for distance (better indicated by higher values) –at the time to return to sport after 10min of kinesio-tape application</b>          |                  |                  |               |                |             |                              |                |                 |                   |                                                                                                                                    |                  |            |
| 1                                                                                                                                                                    | Gholami 2020     | randomised trial | serious       | not assessable | not serious | very serious <sup>a, b</sup> | none           | 10              | 10                | SMD 0.02 higher<br>(0.85 lower to 0.9 higher)                                                                                      | ⊕○○○<br>Very low | IMPORTANT  |
| <b>Functional - single leg hop for distance (better indicated by higher values) –at the time to return to sport after 2 days of kinesio-tape application</b>         |                  |                  |               |                |             |                              |                |                 |                   |                                                                                                                                    |                  |            |
| 1                                                                                                                                                                    | Gholami 2020     | randomised trial | serious       | not assessable | not serious | very serious <sup>a, b</sup> | none           | 10              | 10                | SMD 0.02 higher<br>(0.86 lower to 0.9 higher)                                                                                      | ⊕○○○<br>Very low | IMPORTANT  |
| <b>Functional - 10 Yard Test (better indicated by higher values) –at the time to return to sport after 10min of kinesio-tape application</b>                         |                  |                  |               |                |             |                              |                |                 |                   |                                                                                                                                    |                  |            |
| 1                                                                                                                                                                    | Gholami 2020     | randomised trial | serious       | not assessable | not serious | very serious <sup>a, b</sup> | none           | 10              | 10                | SMD 0.42 higher<br>(0.47 lower to 1.31 higher)                                                                                     | ⊕○○○<br>Very low | IMPORTANT  |
| <b>Functional - 10 Yard Test (better indicated by higher values) –at the time to return to sport after 2 days of kinesio-tape application</b>                        |                  |                  |               |                |             |                              |                |                 |                   |                                                                                                                                    |                  |            |
| 1                                                                                                                                                                    | Gholami 2020     | randomised trial | serious       | not assessable | not serious | very serious <sup>a, b</sup> | none           | 10              | 10                | SMD 0.15 higher<br>(0.73 lower to 1.03 higher)                                                                                     | ⊕○○○<br>Very low | IMPORTANT  |
| <b>Adverse events</b>                                                                                                                                                |                  |                  |               |                |             |                              |                |                 |                   |                                                                                                                                    |                  |            |
| Boguszewski 2013                                                                                                                                                     |                  |                  |               |                |             |                              |                |                 |                   | None reported                                                                                                                      |                  | CRITICAL   |
| Balki 2016                                                                                                                                                           |                  |                  |               |                |             |                              |                |                 |                   | None reported                                                                                                                      |                  | CRITICAL   |

| Certainty assessment |              |              |               |              |             |                      | No of patients |                 | Effect            |                   | Certainty | Importance |
|----------------------|--------------|--------------|---------------|--------------|-------------|----------------------|----------------|-----------------|-------------------|-------------------|-----------|------------|
| No of studies        | Study design | Risk of bias | Inconsistency | Indirectness | Imprecision | Other considerations | Kinesio-tape   | No kinesio-tape | Relative (95% CI) | Absolute (95% CI) |           |            |
| Oliveira 2016        |              |              |               |              |             |                      |                |                 | None reported     |                   |           | CRITICAL   |
| Balki 2019           |              |              |               |              |             |                      |                |                 | None reported     |                   |           | CRITICAL   |
| Chan 2017            |              |              |               |              |             |                      |                |                 | None reported     |                   |           | CRITICAL   |
| Gholami 2020         |              |              |               |              |             |                      |                |                 | None reported     |                   |           | CRITICAL   |

CI: confidence interval; SMD: standardised mean difference

- Total participants <800
- 95% CI of an SMD extends > 0.5 points in either direction
- Not reporting results or SDs

## Dry needling versus no dry needling in rehabilitation after ACLR

Bibliography: Velázquez-Saornil 2017

| Certainty assessment                                                                                           |                  |              |                |              |                              |                      | No of patients |                 | Effect                                          |                   | Certainty        | Importance |
|----------------------------------------------------------------------------------------------------------------|------------------|--------------|----------------|--------------|------------------------------|----------------------|----------------|-----------------|-------------------------------------------------|-------------------|------------------|------------|
| No of studies                                                                                                  | Study design     | Risk of bias | Inconsistency  | Indirectness | Imprecision                  | Other considerations | Dry needling   | No dry needling | Relative (95% CI)                               | Absolute (95% CI) |                  |            |
| <b>Pain</b>                                                                                                    |                  |              |                |              |                              |                      |                |                 |                                                 |                   |                  |            |
| 1                                                                                                              |                  |              |                |              |                              |                      |                |                 |                                                 |                   |                  |            |
| <b>Pain – VAS scale (better indicated by lower values) – 2 weeks post-op – 1 hour after intervention</b>       |                  |              |                |              |                              |                      |                |                 |                                                 |                   |                  |            |
| 1<br>Velázquez-Saornil 2017                                                                                    | randomised trial | very serious | not assessable | not serious  | very serious <sup>a, b</sup> | none                 | 21             | 21              | SMD 1.37 higher<br>(0.69 higher to 2.05 higher) |                   | ⊕○○○<br>Very low | CRITICAL   |
| <b>Pain – VAS scale (better indicated by lower values) – 2 weeks post-op – 1 day after intervention</b>        |                  |              |                |              |                              |                      |                |                 |                                                 |                   |                  |            |
| 1<br>Velázquez-Saornil 2017                                                                                    | randomised trial | very serious | not assessable | not serious  | very serious <sup>a, b</sup> | none                 | 21             | 21              | SMD 0<br>(0.6 lower to 0.6 higher)              |                   | ⊕○○○<br>Very low | CRITICAL   |
| <b>Pain – VAS scale (better indicated by lower values) – 3 weeks post-op – 1 week after intervention</b>       |                  |              |                |              |                              |                      |                |                 |                                                 |                   |                  |            |
| 1<br>Velázquez-Saornil 2017                                                                                    | randomised trial | very serious | not assessable | not serious  | very serious <sup>a, b</sup> | none                 | 21             | 21              | SMD 0.34 lower<br>(0.95 lower to 0.27 higher)   |                   | ⊕○○○<br>Very low | CRITICAL   |
| <b>Pain – pain VAS scale (better indicated by lower values) – 7 weeks post-op – 5 weeks after intervention</b> |                  |              |                |              |                              |                      |                |                 |                                                 |                   |                  |            |
| 1<br>Velázquez-Saornil 2017                                                                                    | randomised trial | very serious | not assessable | not serious  | very serious <sup>a, b</sup> | none                 | 21             | 21              | SMD 0.47 lower<br>(1.08 lower to 0.14 higher)   |                   | ⊕○○○<br>Very low | CRITICAL   |
| <b>Patient reported outcomes (PROM)</b>                                                                        |                  |              |                |              |                              |                      |                |                 |                                                 |                   |                  |            |
| 1                                                                                                              |                  |              |                |              |                              |                      |                |                 |                                                 |                   |                  |            |
| <b>PROM – WOMAC (better indicated by lower values) – 2 weeks post-op – 1 hour after intervention</b>           |                  |              |                |              |                              |                      |                |                 |                                                 |                   |                  |            |
| 1<br>Velázquez-Saornil 2017                                                                                    | randomised trial | very serious | not assessable | not serious  | very serious <sup>a, b</sup> | none                 | 21             | 21              | SMD 0.35 higher<br>(0.26 lower to 0.96 higher)  |                   | ⊕○○○<br>Very low | CRITICAL   |
| <b>PROM – WOMAC (better indicated by lower values) – 2 weeks post-op – 1 day after intervention</b>            |                  |              |                |              |                              |                      |                |                 |                                                 |                   |                  |            |
| 1<br>Velázquez-Saornil 2017                                                                                    | randomised trial | very serious | not assessable | not serious  | very serious <sup>a, b</sup> | none                 | 21             | 21              | SMD 0.81 lower<br>(1.44 lower to 0.18 lower)    |                   | ⊕○○○<br>Very low | CRITICAL   |
| <b>PROM – WOMAC (better indicated by lower values) – 3 weeks post-op – 1 week after intervention</b>           |                  |              |                |              |                              |                      |                |                 |                                                 |                   |                  |            |
| 1<br>Velázquez-Saornil 2017                                                                                    | randomised trial | very serious | not assessable | not serious  | very serious <sup>a, b</sup> | none                 | 21             | 21              | SMD 0.75 lower<br>(1.38 lower to 0.12 lower)    |                   | ⊕○○○<br>Very low | CRITICAL   |
| <b>PROM – WOMAC (better indicated by lower values) – 7 weeks post-op – 5 weeks after intervention</b>          |                  |              |                |              |                              |                      |                |                 |                                                 |                   |                  |            |
| 1<br>Velázquez-Saornil 2017                                                                                    | randomised trial | very serious | not assessable | not serious  | very serious <sup>a, b</sup> | none                 | 21             | 21              | SMD 1.16 lower<br>(1.82 lower to 0.5 lower)     |                   | ⊕○○○<br>Very low | CRITICAL   |
| <b>Range of motion (ROM)</b>                                                                                   |                  |              |                |              |                              |                      |                |                 |                                                 |                   |                  |            |
| 1                                                                                                              |                  |              |                |              |                              |                      |                |                 |                                                 |                   |                  |            |
| <b>ROM – knee flexion (better indicated by higher values) – 2 weeks post-op – 1 hour after intervention</b>    |                  |              |                |              |                              |                      |                |                 |                                                 |                   |                  |            |
| 1<br>Velázquez-Saornil 2017                                                                                    | randomised trial | very serious | not assessable | not serious  | very serious <sup>a, b</sup> | none                 | 21             | 21              | SMD 1.04 higher<br>(0.39 higher to 1.69 higher) |                   | ⊕○○○<br>Very low | CRITICAL   |
| <b>ROM – knee flexion (better indicated by higher values) – 2 weeks post-op – 1 day after intervention</b>     |                  |              |                |              |                              |                      |                |                 |                                                 |                   |                  |            |
| 1<br>Velázquez-Saornil 2017                                                                                    | randomised trial | very serious | not assessable | not serious  | very serious <sup>a, b</sup> | none                 | 21             | 21              | SMD 1.5 higher<br>(0.81 higher to 2.2 higher)   |                   | ⊕○○○<br>Very low | CRITICAL   |

85

Aspetar clinical practice guideline on rehabilitation after ACLR: Supplementary file

| Certainty assessment                                                                                                            |                  |              |                |              |                              |                      | No of patients |                 | Effect                                                                                                                                                                                                                              |                   | Certainty        | Importance |
|---------------------------------------------------------------------------------------------------------------------------------|------------------|--------------|----------------|--------------|------------------------------|----------------------|----------------|-----------------|-------------------------------------------------------------------------------------------------------------------------------------------------------------------------------------------------------------------------------------|-------------------|------------------|------------|
| No of studies                                                                                                                   | Study design     | Risk of bias | Inconsistency  | Indirectness | Imprecision                  | Other considerations | Dry needling   | No dry needling | Relative (95% CI)                                                                                                                                                                                                                   | Absolute (95% CI) |                  |            |
| <b>ROM - knee flexion (better indicated by higher values) – 3 weeks post-op – 1 week after intervention</b>                     |                  |              |                |              |                              |                      |                |                 |                                                                                                                                                                                                                                     |                   |                  |            |
| 1<br>Velázquez-Saornil 2017                                                                                                     | randomised trial | very serious | not assessable | not serious  | very serious <sup>a, b</sup> | none                 | 21             | 21              | SMD 1.5 higher<br>(0.8 higher to 2.19 higher)                                                                                                                                                                                       |                   | ⊕○○○<br>Very low | CRITICAL   |
| <b>ROM - knee flexion (better indicated by higher values) – 7 weeks post-op – 5 weeks after intervention</b>                    |                  |              |                |              |                              |                      |                |                 |                                                                                                                                                                                                                                     |                   |                  |            |
| 1<br>Velázquez-Saornil 2017                                                                                                     | randomised trial | very serious | not assessable | not serious  | very serious <sup>a, b</sup> | none                 | 21             | 21              | SMD 0.63 higher<br>(0.01 higher to 1.25 higher)                                                                                                                                                                                     |                   | ⊕○○○<br>Very low | CRITICAL   |
| <b>Balance</b>                                                                                                                  |                  |              |                |              |                              |                      |                |                 |                                                                                                                                                                                                                                     |                   |                  |            |
| 1                                                                                                                               |                  |              |                |              |                              |                      |                |                 |                                                                                                                                                                                                                                     |                   |                  |            |
| <b>Balance – star excursion balance test (better indicated by higher values) – 3 weeks post-op – 1 week after intervention</b>  |                  |              |                |              |                              |                      |                |                 |                                                                                                                                                                                                                                     |                   |                  |            |
| 1<br>Velázquez-Saornil 2017                                                                                                     | randomised trial | very serious | not assessable | not serious  | very serious <sup>a, b</sup> | none                 | 21             | 21              | SMD 0.01 lower<br>(0.62 lower to 0.59 higher)                                                                                                                                                                                       |                   | ⊕○○○<br>Very low | IMPORTANT  |
| <b>Balance - star excursion balance test (better indicated by higher values) – 7 weeks post-op – 5 weeks after intervention</b> |                  |              |                |              |                              |                      |                |                 |                                                                                                                                                                                                                                     |                   |                  |            |
| 1<br>Velázquez-Saornil 2017                                                                                                     | randomised trial | very serious | not assessable | not serious  | very serious <sup>a, b</sup> | none                 | 21             | 21              | SMD 0.44 higher<br>(0.17 lower to 1.05 higher)                                                                                                                                                                                      |                   | ⊕○○○<br>Very low | IMPORTANT  |
| <b>Adverse events</b>                                                                                                           |                  |              |                |              |                              |                      |                |                 |                                                                                                                                                                                                                                     |                   |                  |            |
| Velázquez-Saornil 2017                                                                                                          | randomised trial | very serious | not assessable | not serious  | very serious <sup>a, d</sup> | none                 | 3/22 (13.6%)   | 0/22 (0.0%)     | RR 7.00<br>(0.38 to 128.02)                                                                                                                                                                                                         | NA <sup>e</sup>   | ⊕○○○<br>Very low | CRITICAL   |
| <b>Adverse events</b>                                                                                                           |                  |              |                |              |                              |                      |                |                 |                                                                                                                                                                                                                                     |                   |                  |            |
| Velázquez-Saornil 2017                                                                                                          |                  |              |                |              |                              |                      |                |                 | Three patients suffered hemorrhage after TrP-DN, one of which was lost to follow-up because of this adverse effect. Nevertheless, differences in the adverse effects between groups did not reach statistical significance (P=.073) |                   |                  | CRITICAL   |

CI: confidence interval; SMD: standardised mean difference; RR: risk ratio

WOMAC: Western Ontario and McMaster Universities Osteoarthritis Index

- Total participants <800
- 95% CI of an SMD extends > 0.5 points in either direction
- Not reporting results or SDs
- 95% CI boundaries cross the arbitrary thresholds of 0.75 and 1.25
- Due to zero events in the comparator arm, an absolute risk reduction was not estimable.

## Whole-body vibration (WBV) versus usual care in rehabilitation after ACLR

Bibliography: Salvarani 2003, Moezy 2008, Fu 2013, Berschin 2014, Pistone 2016, Costantino 2018, da Costa 2019

| No of studies                                                                                        | Study design      | Certainty assessment |                                     |              |                             |                      | No of patients       |            | Effect                                          |                   | Certainty | Importance |
|------------------------------------------------------------------------------------------------------|-------------------|----------------------|-------------------------------------|--------------|-----------------------------|----------------------|----------------------|------------|-------------------------------------------------|-------------------|-----------|------------|
|                                                                                                      |                   | Risk of bias         | Inconsistency                       | Indirectness | Imprecision                 | Other considerations | Whole-body vibration | Usual care | Relative (95% CI)                               | Absolute (95% CI) |           |            |
| <b>Strength</b>                                                                                      |                   |                      |                                     |              |                             |                      |                      |            |                                                 |                   |           |            |
| 6                                                                                                    |                   |                      |                                     |              |                             |                      |                      |            |                                                 |                   |           |            |
| <b>Strength - Quadriceps ISOM 25-60° (better indicated by higher values) – 5-6 weeks post-op</b>     |                   |                      |                                     |              |                             |                      |                      |            |                                                 |                   |           |            |
| 2<br>Berschin 2014<br>Salvarani 2003                                                                 | randomised trials | very serious         | not serious<br>I <sup>2</sup> =37%  | not serious  | very serious <sup>a,b</sup> | none                 | 30                   | 30         | SMD 0.32 higher<br>(0.36 lower to 1 higher)     | ⊕○○○<br>Very low  | CRITICAL  |            |
| <b>Strength - Quadriceps ISOM 25-90° (better indicated by higher values) – 2 months post-op</b>      |                   |                      |                                     |              |                             |                      |                      |            |                                                 |                   |           |            |
| 3<br>Berschin 2014<br>Pistone 2016<br>Salvarani 2003                                                 | randomised trials | very serious         | serious<br>I <sup>2</sup> =42%      | not serious  | very serious <sup>a,b</sup> | none                 | 47                   | 47         | SMD 0.15 higher<br>(0.4 lower to 0.7 higher)    | ⊕○○○<br>Very low  | CRITICAL  |            |
| <b>Strength - Quadriceps CON 60°/s (better indicated by higher values) – 2 months post-op</b>        |                   |                      |                                     |              |                             |                      |                      |            |                                                 |                   |           |            |
| 1<br>Berschin 2014                                                                                   | randomised trial  | serious              | not assessable                      | not serious  | very serious <sup>a,b</sup> | none                 | 20                   | 20         | SMD 0.05 lower<br>(0.67 lower to 0.57 higher)   | ⊕○○○<br>Very low  | CRITICAL  |            |
| <b>Strength - Quadriceps ISOM 60-90°/s (better indicated by higher values) – 3 months post-op</b>    |                   |                      |                                     |              |                             |                      |                      |            |                                                 |                   |           |            |
| 2<br>Berschin 2014<br>Pistone 2016                                                                   | randomised trials | serious              | very serious<br>I <sup>2</sup> =89% | not serious  | very serious <sup>a,b</sup> | none                 | 37                   | 37         | SMD 0.14 lower<br>(1.59 lower to 1.31 higher)   | ⊕○○○<br>Very low  | CRITICAL  |            |
| <b>Strength - Quadriceps CON 60°/s (better indicated by higher values) – 3 months post-op</b>        |                   |                      |                                     |              |                             |                      |                      |            |                                                 |                   |           |            |
| 1<br>Berschin 2014                                                                                   | randomised trial  | serious              | not assessable                      | not serious  | very serious <sup>a,b</sup> | none                 | 20                   | 20         | SMD 0.27 higher<br>(0.35 lower to 0.9 higher)   | ⊕○○○<br>Very low  | CRITICAL  |            |
| <b>Strength - Quadriceps CON 300°/s (better indicated by higher values) – 3 months post-op</b>       |                   |                      |                                     |              |                             |                      |                      |            |                                                 |                   |           |            |
| 1<br>Fu 2013                                                                                         | randomised trial  | serious              | not assessable                      | not serious  | very serious <sup>a,b</sup> | none                 | 24                   | 24         | SMD 0.34 higher<br>(0.23 lower to 0.91 higher)  | ⊕○○○<br>Very low  | CRITICAL  |            |
| <b>Strength - Quadriceps Work (better indicated by higher values) – 4 months post-op</b>             |                   |                      |                                     |              |                             |                      |                      |            |                                                 |                   |           |            |
| 1<br>da Costa 2019                                                                                   | randomised trial  | not serious          | not assessable                      | not serious  | very serious <sup>a,b</sup> | none                 | 22                   | 22         | SMD 0.59 lower<br>(1.2 lower to 0.01 higher)    | ⊕⊕○○<br>Low       | CRITICAL  |            |
| <b>Strength - Quadriceps CON 60°/s (better indicated by higher values) – 4-6 months post-op</b>      |                   |                      |                                     |              |                             |                      |                      |            |                                                 |                   |           |            |
| 3<br>Costantino 2018<br>da Costa 2019<br>Fu 2013                                                     | randomised trials | serious              | very serious<br>I <sup>2</sup> =92% | serious      | very serious <sup>a,b</sup> | none                 | 65                   | 66         | SMD 0.66 higher<br>(0.69 lower to 2.02 higher)  | ⊕○○○<br>Very low  | CRITICAL  |            |
| <b>Strength - Quadriceps power CON 60°/s (better indicated by higher values) – 5 months post-op</b>  |                   |                      |                                     |              |                             |                      |                      |            |                                                 |                   |           |            |
| 1<br>Costantino 2018                                                                                 | randomised trial  | serious              | not assessable                      | not serious  | very serious <sup>a,b</sup> | none                 | 19                   | 20         | SMD 1.57 higher<br>(0.84 higher to 2.29 higher) | ⊕○○○<br>Very low  | CRITICAL  |            |
| <b>Strength - Quadriceps power CON 180°/s (better indicated by higher values) – 5 months post-op</b> |                   |                      |                                     |              |                             |                      |                      |            |                                                 |                   |           |            |
| 1<br>Costantino 2018                                                                                 | randomised trial  | serious              | not assessable                      | not serious  | very serious <sup>a,b</sup> | none                 | 19                   | 20         | SMD 3.29 higher<br>(2.3 higher to 4.28 higher)  | ⊕○○○<br>Very low  | CRITICAL  |            |
| <b>Strength - Quadriceps CON 180°/s (better indicated by higher values) – 5-6 months post-op</b>     |                   |                      |                                     |              |                             |                      |                      |            |                                                 |                   |           |            |
| 2<br>Costantino 2018<br>Fu 2013                                                                      | randomised trials | serious              | very serious<br>I <sup>2</sup> =85% | not serious  | very serious <sup>a,b</sup> | none                 | 43                   | 44         | SMD 0.98 higher<br>(0.21 lower to 2.17 higher)  | ⊕○○○<br>Very low  | CRITICAL  |            |

87

Aspetar clinical practice guideline on rehabilitation after ACLR: Supplementary file

| Certainty assessment                                                                               |                               |                   |               |                                     |             |                             | No of patients       |            | Effect            |                                                 | Certainty        | Importance |
|----------------------------------------------------------------------------------------------------|-------------------------------|-------------------|---------------|-------------------------------------|-------------|-----------------------------|----------------------|------------|-------------------|-------------------------------------------------|------------------|------------|
| No of studies                                                                                      | Study design                  | Risk of bias      | Inconsistency | Indirectness                        | Imprecision | Other considerations        | Whole-body vibration | Usual care | Relative (95% CI) | Absolute (95% CI)                               |                  |            |
| <b>Strength - Quadriceps CON 300°/s (better indicated by higher values) – 6 months post-op</b>     |                               |                   |               |                                     |             |                             |                      |            |                   |                                                 |                  |            |
| 1                                                                                                  | Fu 2013                       | randomised trial  | serious       | not assessable                      | not serious | very serious <sup>a,b</sup> | none                 | 24         | 24                | SMD 0.44 higher<br>(0.14 lower to 1.01 higher)  | ⊕○○○<br>Very low | CRITICAL   |
| <b>Strength - Hamstring ISOM 60° (better indicated by higher values) – 5 weeks post-op</b>         |                               |                   |               |                                     |             |                             |                      |            |                   |                                                 |                  |            |
| 1                                                                                                  | Berschin 2014                 | randomised trial  | serious       | not assessable                      | not serious | very serious <sup>a,b</sup> | none                 | 20         | 20                | SMD 0<br>(0.62 lower to 0.62 higher)            | ⊕○○○<br>Very low | CRITICAL   |
| <b>Strength - Hamstring ISOM 60-90° (better indicated by higher values) – 2 months post-op</b>     |                               |                   |               |                                     |             |                             |                      |            |                   |                                                 |                  |            |
| 2                                                                                                  | Berschin 2014<br>Pistone 2016 | randomised trials | serious       | not serious<br>I <sup>2</sup> =0%   | not serious | serious <sup>a</sup>        | none                 | 37         | 37                | SMD 0.34 higher<br>(0.12 lower to 0.8 higher)   | ⊕⊕○○<br>Low      | CRITICAL   |
| <b>Strength - Hamstring CON 60°/s (better indicated by higher values) – 2 months post-op</b>       |                               |                   |               |                                     |             |                             |                      |            |                   |                                                 |                  |            |
| 1                                                                                                  | Berschin 2014                 | randomised trial  | serious       | not assessable                      | not serious | very serious <sup>a,b</sup> | none                 | 20         | 20                | SMD 0.13 lower<br>(0.75 lower to 0.49 higher)   | ⊕○○○<br>Very low | CRITICAL   |
| <b>Strength - Hamstring ISOM 60-90° (better indicated by higher values) – 3 months post-op</b>     |                               |                   |               |                                     |             |                             |                      |            |                   |                                                 |                  |            |
| 2                                                                                                  | Berschin 2014<br>Pistone 2016 | randomised trials | serious       | serious<br>I <sup>2</sup> =48%      | not serious | very serious <sup>a,b</sup> | none                 | 37         | 37                | SMD 0.43 higher<br>(0.22 lower to 1.07 higher)  | ⊕○○○<br>Very low | CRITICAL   |
| <b>Strength - Hamstring CON 60°/s (better indicated by higher values) – 3 months post-op</b>       |                               |                   |               |                                     |             |                             |                      |            |                   |                                                 |                  |            |
| 1                                                                                                  | Berschin 2014                 | randomised trial  | serious       | not assessable                      | not serious | very serious <sup>a,b</sup> | none                 | 20         | 20                | SMD 0.36 higher<br>(0.27 lower to 0.98 higher)  | ⊕○○○<br>Very low | CRITICAL   |
| <b>Strength - Hamstring CON 300°/s (better indicated by higher values) – 3 months post-op</b>      |                               |                   |               |                                     |             |                             |                      |            |                   |                                                 |                  |            |
| 1                                                                                                  | Fu 2013                       | randomised trial  | serious       | not assessable                      | not serious | very serious <sup>a,b</sup> | none                 | 24         | 24                | SMD 0.39 higher<br>(0.18 lower to 0.96 higher)  | ⊕○○○<br>Very low | CRITICAL   |
| <b>Strength - Hamstring power CON 60°/s (better indicated by higher values) – 5 months post-op</b> |                               |                   |               |                                     |             |                             |                      |            |                   |                                                 |                  |            |
| 1                                                                                                  | Costantino 2018               | randomised trial  | serious       | not assessable                      | not serious | very serious <sup>a,b</sup> | none                 | 19         | 20                | SMD 4.4 higher<br>(3.2 higher to 5.61 higher)   | ⊕○○○<br>Very low | CRITICAL   |
| <b>Strength - Hamstring power CON180°/s (better indicated by higher values) – 5 months post-op</b> |                               |                   |               |                                     |             |                             |                      |            |                   |                                                 |                  |            |
| 1                                                                                                  | Costantino 2018               | randomised trial  | serious       | not assessable                      | not serious | very serious <sup>a,b</sup> | none                 | 19         | 20                | SMD 5.22 higher<br>(3.85 higher to 6.59 higher) | ⊕○○○<br>Very low | CRITICAL   |
| <b>Strength - Hamstring CON 60°/s (better indicated by higher values) – 5-6 months post-op</b>     |                               |                   |               |                                     |             |                             |                      |            |                   |                                                 |                  |            |
| 2                                                                                                  | Costantino 2018<br>Fu 2013    | randomised trials | serious       | very serious<br>I <sup>2</sup> =94% | not serious | very serious <sup>a,b</sup> | none                 | 43         | 44                | SMD 1.32 higher<br>(0.84 lower to 3.49 higher)  | ⊕○○○<br>Very low | CRITICAL   |
| <b>Strength - Hamstring CON 180°/s (better indicated by higher values) – 5-6 months post-op</b>    |                               |                   |               |                                     |             |                             |                      |            |                   |                                                 |                  |            |
| 2                                                                                                  | Costantino 2018<br>Fu 2013    | randomised trials | serious       | very serious<br>I <sup>2</sup> =95% | not serious | very serious <sup>a,b</sup> | none                 | 43         | 44                | SMD 1.39 higher<br>(0.87 lower to 3.64 higher)  | ⊕○○○<br>Very low | CRITICAL   |
| <b>Strength - Hamstring CON 300°/s (better indicated by higher values) – 6 months post-op</b>      |                               |                   |               |                                     |             |                             |                      |            |                   |                                                 |                  |            |
| 1                                                                                                  | Fu 2013                       | randomised trial  | serious       | not assessable                      | not serious | very serious <sup>a,b</sup> | none                 | 24         | 24                | SMD 0.43 higher<br>(0.14 lower to 1.01 higher)  | ⊕○○○<br>Very low | CRITICAL   |
| <b>Proprioception</b>                                                                              |                               |                   |               |                                     |             |                             |                      |            |                   |                                                 |                  |            |
| 2                                                                                                  |                               |                   |               |                                     |             |                             |                      |            |                   |                                                 |                  |            |
| <b>Proprioception - Angular error 30° (better indicated by lower values) – 3-4 months post-op</b>  |                               |                   |               |                                     |             |                             |                      |            |                   |                                                 |                  |            |
| 2                                                                                                  | Fu 2013<br>Moezy 2008         | randomised trials | serious       | very serious<br>I <sup>2</sup> =87% | not serious | very serious <sup>a,b</sup> | none                 | 34         | 34                | SMD 0.80 lower<br>(2.46 lower to 0.86 higher)   | ⊕○○○<br>Very low | CRITICAL   |
| <b>Proprioception - Angular error 60° (better indicated by lower values) – 3-4 months post-op</b>  |                               |                   |               |                                     |             |                             |                      |            |                   |                                                 |                  |            |

| Certainty assessment                                                                                                    |                   |              |                                     |              |                             |                      | No of patients       |            | Effect                                          |                   | Certainty        | Importance |
|-------------------------------------------------------------------------------------------------------------------------|-------------------|--------------|-------------------------------------|--------------|-----------------------------|----------------------|----------------------|------------|-------------------------------------------------|-------------------|------------------|------------|
| No of studies                                                                                                           | Study design      | Risk of bias | Inconsistency                       | Indirectness | Imprecision                 | Other considerations | Whole-body vibration | Usual care | Relative (95% CI)                               | Absolute (95% CI) |                  |            |
| 2<br>Fu 2013<br>Moezy 2008                                                                                              | randomised trials | serious      | not serious<br>I <sup>2</sup> =28%  | not serious  | very serious <sup>a,b</sup> | none                 | 34                   | 34         | SMD 0.25 lower<br>(0.85 lower to 0.34 higher)   |                   | ⊕○○○<br>Very low | CRITICAL   |
| <b>Proprioception - Angular error 30° (better indicated by lower values) – 6 months post-op</b>                         |                   |              |                                     |              |                             |                      |                      |            |                                                 |                   |                  |            |
| 1<br>Fu 2013                                                                                                            | randomised trial  | serious      | not assessable                      | not serious  | very serious <sup>a,b</sup> | none                 | 24                   | 24         | SMD 0.27 lower<br>(0.84 lower to 0.3 higher)    |                   | ⊕○○○<br>Very low | CRITICAL   |
| <b>Proprioception - Angular error 60° (better indicated by lower values) – 6 months post-op</b>                         |                   |              |                                     |              |                             |                      |                      |            |                                                 |                   |                  |            |
| 1<br>Fu 2013                                                                                                            | randomised trial  | serious      | not assessable                      | not serious  | very serious <sup>a,b</sup> | none                 | 24                   | 24         | SMD 0.27 lower<br>(0.84 lower to 0.3 higher)    |                   | ⊕○○○<br>Very low | CRITICAL   |
| <b>Balance</b>                                                                                                          |                   |              |                                     |              |                             |                      |                      |            |                                                 |                   |                  |            |
| 5                                                                                                                       |                   |              |                                     |              |                             |                      |                      |            |                                                 |                   |                  |            |
| <b>Balance – open eyes stability index (better indicated by lower values) – 5 weeks post-op</b>                         |                   |              |                                     |              |                             |                      |                      |            |                                                 |                   |                  |            |
| 1<br>Berschin 2014                                                                                                      | randomised trial  | serious      | not assessable                      | not serious  | very serious <sup>a,b</sup> | none                 | 20                   | 20         | SMD 0.51 lower<br>(1.14 lower to 0.12 higher)   |                   | ⊕○○○<br>Very low | CRITICAL   |
| <b>Balance - open eyes stability index (better indicated by lower values) – 2 months post-op</b>                        |                   |              |                                     |              |                             |                      |                      |            |                                                 |                   |                  |            |
| 2<br>Pistone 2016<br>Berschin 2014                                                                                      | randomised trials | serious      | not serious<br>I <sup>2</sup> =32%  | not serious  | very serious <sup>a,b</sup> | none                 | 37                   | 37         | SMD 0.5 lower<br>(1.07 lower to 0.06 higher)    |                   | ⊕○○○<br>Very low | CRITICAL   |
| <b>Balance - open eyes stability index (better indicated by lower values) – 3-4 months post-op</b>                      |                   |              |                                     |              |                             |                      |                      |            |                                                 |                   |                  |            |
| 4<br>Fu 2013<br>Moezy 2008<br>Pistone 2016<br>Berschin 2014                                                             | randomised trials | serious      | serious<br>I <sup>2</sup> =74%      | not serious  | very serious <sup>a,b</sup> | none                 | 71                   | 71         | SMD 1.03 lower<br>(1.75 lower to 0.31 lower)    |                   | ⊕○○○<br>Very low | CRITICAL   |
| <b>Balance - Open eyes anterior-posterior stability index (better indicated by lower values) – 3-4 months post-op</b>   |                   |              |                                     |              |                             |                      |                      |            |                                                 |                   |                  |            |
| 2<br>Fu 2013<br>Moezy 2008                                                                                              | randomised trials | serious      | serious<br>I <sup>2</sup> =60%      | not serious  | very serious <sup>a,b</sup> | none                 | 34                   | 34         | SMD 0.52 lower<br>(1.38 lower to 0.33 higher)   |                   | ⊕○○○<br>Very low | CRITICAL   |
| <b>Balance - Open eyes medial-lateral stability index (better indicated by lower values) – 3-4 months post-op</b>       |                   |              |                                     |              |                             |                      |                      |            |                                                 |                   |                  |            |
| 2<br>Fu 2013<br>Moezy 2008                                                                                              | randomised trials | serious      | very serious<br>I <sup>2</sup> =82% | not serious  | very serious <sup>a,b</sup> | none                 | 34                   | 34         | SMD 1.22 lower<br>(2.72 lower to 0.28 higher)   |                   | ⊕○○○<br>Very low | CRITICAL   |
| <b>Balance - Closed eyes stability index (better indicated by lower values) – 3-4 months post-op</b>                    |                   |              |                                     |              |                             |                      |                      |            |                                                 |                   |                  |            |
| 3<br>Fu 2013<br>Moezy 2008<br>Pistone 2016                                                                              | randomised trials | serious      | serious<br>I <sup>2</sup> =50%      | not serious  | very serious <sup>a,b</sup> | none                 | 51                   | 51         | SMD 0.97 lower<br>(1.59 lower to 0.35 lower)    |                   | ⊕○○○<br>Very low | CRITICAL   |
| <b>Balance - Closed eyes anterior-posterior stability index (better indicated by lower values) – 3-4 months post-op</b> |                   |              |                                     |              |                             |                      |                      |            |                                                 |                   |                  |            |
| 2<br>Fu 2013<br>Moezy 2008                                                                                              | randomised trials | serious      | serious<br>I <sup>2</sup> =70%      | not serious  | very serious <sup>a,b</sup> | none                 | 34                   | 34         | SMD 1.36 lower<br>(2.51 lower to 0.21 lower)    |                   | ⊕○○○<br>Very low | CRITICAL   |
| <b>Balance - Closed eye medial-lateral stability index (better indicated by lower values) – 3-4 months post-op</b>      |                   |              |                                     |              |                             |                      |                      |            |                                                 |                   |                  |            |
| 2<br>Fu 2013<br>Moezy 2008                                                                                              | randomised trials | serious      | not serious<br>I <sup>2</sup> =0%   | not serious  | serious <sup>a</sup>        | none                 | 34                   | 34         | SMD 0.79 lower<br>(1.29 lower to 0.29 lower)    |                   | ⊕⊕○○<br>Low      | CRITICAL   |
| <b>Balance - anterior-posterior velocity (better indicated by lower values) – 4 months post-op</b>                      |                   |              |                                     |              |                             |                      |                      |            |                                                 |                   |                  |            |
| 1<br>da Costa 2019                                                                                                      | randomised trial  | not serious  | not assessable                      | not serious  | very serious <sup>a,b</sup> | none                 | 22                   | 22         | SMD 1.13 higher<br>(0.49 higher to 1.77 higher) |                   | ⊕⊕○○<br>Low      | CRITICAL   |
| <b>Balance - medial-lateral velocity (better indicated by lower values) – 4 months post-op</b>                          |                   |              |                                     |              |                             |                      |                      |            |                                                 |                   |                  |            |

| Certainty assessment                                                                                                  |               |                  |               |                |             |                             | No of patients       |            | Effect            |                                                                                                            | Certainty | Importance       |           |
|-----------------------------------------------------------------------------------------------------------------------|---------------|------------------|---------------|----------------|-------------|-----------------------------|----------------------|------------|-------------------|------------------------------------------------------------------------------------------------------------|-----------|------------------|-----------|
| No of studies                                                                                                         | Study design  | Risk of bias     | Inconsistency | Indirectness   | Imprecision | Other considerations        | Whole-body vibration | Usual care | Relative (95% CI) | Absolute (95% CI)                                                                                          |           |                  |           |
| 1                                                                                                                     | da Costa 2019 | randomised trial | not serious   | not assessable | not serious | very serious <sup>a,b</sup> | none                 | 22         | 22                | SMD 1.76 lower<br>(2.47 lower to 1.05 lower)                                                               |           | ⊕⊕○○<br>Low      | CRITICAL  |
| <b>Balance - Open eyes overall stability (better indicated by lower values) – 6 months post-op</b>                    |               |                  |               |                |             |                             |                      |            |                   |                                                                                                            |           |                  |           |
| 1                                                                                                                     | Fu 2013       | randomised trial | serious       | not assessable | not serious | very serious <sup>a,b</sup> | none                 | 24         | 24                | SMD 0.49 lower<br>(1.06 lower to 0.09 higher)                                                              |           | ⊕○○○<br>Very low | CRITICAL  |
| <b>Balance - Open eyes anterior-posterior stability index (better indicated by lower values) – 6 months post-op</b>   |               |                  |               |                |             |                             |                      |            |                   |                                                                                                            |           |                  |           |
| 1                                                                                                                     | Fu 2013       | randomised trial | serious       | not assessable | not serious | very serious <sup>a,b</sup> | none                 | 24         | 24                | SMD 0.05 lower<br>(0.62 lower to 0.51 higher)                                                              |           | ⊕○○○<br>Very low | CRITICAL  |
| <b>Balance - Open eye medial-lateral stability index (better indicated by lower values) – 6 months post-op</b>        |               |                  |               |                |             |                             |                      |            |                   |                                                                                                            |           |                  |           |
| 1                                                                                                                     | Fu 2013       | randomised trial | serious       | not assessable | not serious | very serious <sup>a,b</sup> | none                 | 24         | 24                | SMD 0.46 lower<br>(1.03 lower to 0.12 higher)                                                              |           | ⊕○○○<br>Very low | CRITICAL  |
| <b>Balance - Closed eyes overall stability (better indicated by lower values) – 6 months post-op</b>                  |               |                  |               |                |             |                             |                      |            |                   |                                                                                                            |           |                  |           |
| 1                                                                                                                     | Fu 2013       | randomised trial | serious       | not assessable | not serious | very serious <sup>a,b</sup> | none                 | 24         | 24                | SMD 0.19 lower<br>(0.75 lower to 0.38 higher)                                                              |           | ⊕○○○<br>Very low | CRITICAL  |
| <b>Balance - Closed eyes anterior-posterior stability index (better indicated by lower values) – 6 months post-op</b> |               |                  |               |                |             |                             |                      |            |                   |                                                                                                            |           |                  |           |
| 1                                                                                                                     | Fu 2013       | randomised trial | serious       | not assessable | not serious | very serious <sup>a,b</sup> | none                 | 24         | 24                | SMD 0.51 lower<br>(1.09 lower to 0.07 higher)                                                              |           | ⊕○○○<br>Very low | CRITICAL  |
| <b>Balance - Closed eye medial-lateral stability index (better indicated by lower values) – 6 months post-op</b>      |               |                  |               |                |             |                             |                      |            |                   |                                                                                                            |           |                  |           |
| 1                                                                                                                     | Fu 2013       | randomised trial | serious       | not assessable | not serious | very serious <sup>a,b</sup> | none                 | 24         | 24                | SMD 0.47 lower<br>(1.04 lower to 0.11 higher)                                                              |           | ⊕○○○<br>Very low | CRITICAL  |
| <b>Patient reported outcome measures (PROM)</b>                                                                       |               |                  |               |                |             |                             |                      |            |                   |                                                                                                            |           |                  |           |
| 2                                                                                                                     |               |                  |               |                |             |                             |                      |            |                   |                                                                                                            |           |                  |           |
| <b>PROM - Lysholm (better indicated by higher values) – 1 month post-op</b>                                           |               |                  |               |                |             |                             |                      |            |                   |                                                                                                            |           |                  |           |
|                                                                                                                       | Berschin 2014 | randomised trial | very serious  | not assessable | not serious | very serious <sup>a,c</sup> | none                 | 20         | 20                | SDs are not reported. The authors reported no statistically significant difference between the two groups. |           | ⊕○○○<br>Very low | CRITICAL  |
| <b>PROM - Lysholm (better indicated by higher values) – 2 months post-op</b>                                          |               |                  |               |                |             |                             |                      |            |                   |                                                                                                            |           |                  |           |
| 1                                                                                                                     | Pistone 2016  | randomised trial | very serious  | not assessable | not serious | very serious <sup>a,b</sup> | none                 | 17         | 17                | SMD 1.6 higher<br>(0.81 higher to 2.38 higher)                                                             |           | ⊕○○○<br>Very low | CRITICAL  |
|                                                                                                                       | Berschin 2014 | randomised trial | very serious  | not assessable | not serious | very serious <sup>a,c</sup> | none                 | 20         | 20                | SDs are not reported. The authors reported no statistically significant difference between the two groups. |           | ⊕○○○<br>Very low | CRITICAL  |
| <b>PROM - Lysholm (better indicated by higher values) – 3 months post-op</b>                                          |               |                  |               |                |             |                             |                      |            |                   |                                                                                                            |           |                  |           |
| 1                                                                                                                     | Pistone 2016  | randomised trial | very serious  | not assessable | not serious | very serious <sup>a,b</sup> | none                 | 17         | 17                | SMD 2.22 higher<br>(1.34 higher to 3.1 higher)                                                             |           | ⊕○○○<br>Very low | CRITICAL  |
|                                                                                                                       | Berschin 2014 | randomised trial | very serious  | not assessable | not serious | very serious <sup>a,c</sup> | none                 | 20         | 20                | SDs are not reported. The authors reported no statistically significant difference between the two groups. |           | ⊕○○○<br>Very low | CRITICAL  |
| <b>Functional activities</b>                                                                                          |               |                  |               |                |             |                             |                      |            |                   |                                                                                                            |           |                  |           |
| 1                                                                                                                     |               |                  |               |                |             |                             |                      |            |                   |                                                                                                            |           |                  |           |
| <b>Functional - single leg hop for distance (better indicated by higher values) – 6 months post-op</b>                |               |                  |               |                |             |                             |                      |            |                   |                                                                                                            |           |                  |           |
| 1                                                                                                                     | Fu 2013       | randomised trial | serious       | not assessable | not serious | very serious <sup>a,b</sup> | none                 | 24         | 24                | SMD 0.33 higher<br>(0.24 lower to 0.9 higher)                                                              |           | ⊕○○○<br>Very low | IMPORTANT |
| <b>Functional - triple hop for distance (better indicated by higher values) – 6 months post-op</b>                    |               |                  |               |                |             |                             |                      |            |                   |                                                                                                            |           |                  |           |
| 1                                                                                                                     | Fu 2013       | randomised trial | serious       | not assessable | not serious | very serious <sup>a,b</sup> | none                 | 24         | 24                | SMD 0.29 higher<br>(0.28 lower to 0.86 higher)                                                             |           | ⊕○○○<br>Very low | IMPORTANT |
| <b>Functional - shuttle run (better indicated by higher values) – 6 months post-op</b>                                |               |                  |               |                |             |                             |                      |            |                   |                                                                                                            |           |                  |           |

| Certainty assessment                                                                                  |                   |              |                                        |              |                             |                      | No of patients       |            | Effect                                                                                                                                                                         |                   | Certainty        | Importance |
|-------------------------------------------------------------------------------------------------------|-------------------|--------------|----------------------------------------|--------------|-----------------------------|----------------------|----------------------|------------|--------------------------------------------------------------------------------------------------------------------------------------------------------------------------------|-------------------|------------------|------------|
| No of studies                                                                                         | Study design      | Risk of bias | Inconsistency                          | Indirectness | Imprecision                 | Other considerations | Whole-body vibration | Usual care | Relative (95% CI)                                                                                                                                                              | Absolute (95% CI) |                  |            |
| 1<br>Fu 2013                                                                                          | randomised trial  | serious      | not assessable                         | not serious  | very serious <sup>a,b</sup> | none                 | 24                   | 24         | SMD 0.3 lower<br>(0.87 lower to 0.27 higher)                                                                                                                                   |                   | ⊕○○○<br>Very low | IMPORTANT  |
| <b>Functional - carioca (better indicated by higher values) – 6 months post-op</b>                    |                   |              |                                        |              |                             |                      |                      |            |                                                                                                                                                                                |                   |                  |            |
| 1<br>Fu 2013                                                                                          | randomised trial  | serious      | not assessable                         | not serious  | very serious <sup>a,b</sup> | none                 | 24                   | 24         | SMD 0.1 lower<br>(0.67 lower to 0.46 higher)                                                                                                                                   |                   | ⊕○○○<br>Very low | IMPORTANT  |
| <b>Range of motion (ROM)</b>                                                                          |                   |              |                                        |              |                             |                      |                      |            |                                                                                                                                                                                |                   |                  |            |
| 1                                                                                                     |                   |              |                                        |              |                             |                      |                      |            |                                                                                                                                                                                |                   |                  |            |
| <b>ROM - flexion deficit (better indicated by lower values) – 5 weeks post-op</b>                     |                   |              |                                        |              |                             |                      |                      |            |                                                                                                                                                                                |                   |                  |            |
| 1<br>Berschin 2014                                                                                    | randomised trial  | serious      | not assessable                         | not serious  | very serious <sup>a,b</sup> | none                 | 20                   | 20         | SMD 0.22 lower<br>(0.84 lower to 0.4 higher)                                                                                                                                   |                   | ⊕○○○<br>Very low | IMPORTANT  |
| <b>ROM - flexion deficit (better indicated by lower values) – 2 months post-op</b>                    |                   |              |                                        |              |                             |                      |                      |            |                                                                                                                                                                                |                   |                  |            |
| 1<br>Berschin 2014                                                                                    | randomised trial  | serious      | not assessable                         | not serious  | very serious <sup>a,b</sup> | none                 | 20                   | 20         | SMD 0.2 lower<br>(0.82 lower to 0.43 higher)                                                                                                                                   |                   | ⊕○○○<br>Very low | IMPORTANT  |
| <b>ROM - flexion deficit (better indicated by lower values) – 3 months post-op</b>                    |                   |              |                                        |              |                             |                      |                      |            |                                                                                                                                                                                |                   |                  |            |
| 1<br>Berschin 2014                                                                                    | randomised trial  | serious      | not assessable                         | not serious  | very serious <sup>a,b</sup> | none                 | 20                   | 20         | SMD 0.24 lower<br>(0.86 lower to 0.39 higher)                                                                                                                                  |                   | ⊕○○○<br>Very low | IMPORTANT  |
| <b>ROM - extension deficit (better indicated by lower values) – 5 weeks post-op</b>                   |                   |              |                                        |              |                             |                      |                      |            |                                                                                                                                                                                |                   |                  |            |
| 1<br>Berschin 2014                                                                                    | randomised trial  | serious      | not assessable                         | not serious  | very serious <sup>a,b</sup> | none                 | 20                   | 20         | SMD 0.5 lower<br>(1.13 lower to 0.13 higher)                                                                                                                                   |                   | ⊕○○○<br>Very low | IMPORTANT  |
| <b>ROM - extension deficit (better indicated by lower values) – 2 months post-op</b>                  |                   |              |                                        |              |                             |                      |                      |            |                                                                                                                                                                                |                   |                  |            |
| 1<br>Berschin 2014                                                                                    | randomised trial  | serious      | not assessable                         | not serious  | very serious <sup>a,b</sup> | none                 | 20                   | 20         | SMD 0.18 lower<br>(0.8 lower to 0.44 higher)                                                                                                                                   |                   | ⊕○○○<br>Very low | IMPORTANT  |
| <b>ROM - extension deficit (better indicated by lower values) – 3 months post-op</b>                  |                   |              |                                        |              |                             |                      |                      |            |                                                                                                                                                                                |                   |                  |            |
| 1<br>Berschin 2014                                                                                    | randomised trial  | serious      | not assessable                         | not serious  | very serious <sup>a,b</sup> | none                 | 20                   | 20         | SMD 0.44 lower<br>(1.07 lower to 0.19 higher)                                                                                                                                  |                   | ⊕○○○<br>Very low | IMPORTANT  |
| <b>Laxity</b>                                                                                         |                   |              |                                        |              |                             |                      |                      |            |                                                                                                                                                                                |                   |                  |            |
| 2                                                                                                     |                   |              |                                        |              |                             |                      |                      |            |                                                                                                                                                                                |                   |                  |            |
| <b>Laxity – laxity difference between limbs (better indicated by lower values) – 3 months post-op</b> |                   |              |                                        |              |                             |                      |                      |            |                                                                                                                                                                                |                   |                  |            |
| 2<br>Berschin 2014<br>Fu 2013                                                                         | randomised trials | serious      | not serious<br><i>I<sup>2</sup>=0%</i> | not serious  | serious <sup>a</sup>        | none                 | 44                   | 44         | SMD 0.06 lower<br>(0.48 lower to 0.35 higher)                                                                                                                                  |                   | ⊕⊕○○<br>Low      | CRITICAL   |
| <b>Laxity - laxity difference between limbs (better indicated by lower values) – 6 months post-op</b> |                   |              |                                        |              |                             |                      |                      |            |                                                                                                                                                                                |                   |                  |            |
| 1<br>Fu 2013                                                                                          | randomised trial  | serious      | not assessable                         | not serious  | very serious <sup>a,b</sup> | none                 | 24                   | 24         | SMD 0<br>(0.57 lower to 0.57 higher)                                                                                                                                           |                   | ⊕○○○<br>Very low | CRITICAL   |
| <b>Adverse events</b>                                                                                 |                   |              |                                        |              |                             |                      |                      |            |                                                                                                                                                                                |                   |                  |            |
| Salvarani 2003                                                                                        |                   |              |                                        |              |                             |                      |                      |            | None reported                                                                                                                                                                  |                   |                  | CRITICAL   |
| Moezy 2008                                                                                            |                   |              |                                        |              |                             |                      |                      |            | None reported                                                                                                                                                                  |                   |                  | CRITICAL   |
| Fu 2013                                                                                               |                   |              |                                        |              |                             |                      |                      |            | None reported                                                                                                                                                                  |                   |                  | CRITICAL   |
| Berschin 2014                                                                                         |                   |              |                                        |              |                             |                      |                      |            | Minor complications such as pain or swelling during or after muscle exercise occurred in 12/20 (60%) in the WBV group and 14/20 (70%) in the control group up to the 6th week. |                   |                  | CRITICAL   |
| Pistone 2016                                                                                          |                   |              |                                        |              |                             |                      |                      |            | None reported                                                                                                                                                                  |                   |                  | CRITICAL   |
| Costantino 2018                                                                                       |                   |              |                                        |              |                             |                      |                      |            | None reported                                                                                                                                                                  |                   |                  | CRITICAL   |

| Certainty assessment |              |              |               |              |             |                      | No of patients       |            | Effect            |                   | Certainty | Importance |
|----------------------|--------------|--------------|---------------|--------------|-------------|----------------------|----------------------|------------|-------------------|-------------------|-----------|------------|
| No of studies        | Study design | Risk of bias | Inconsistency | Indirectness | Imprecision | Other considerations | Whole-body vibration | Usual care | Relative (95% CI) | Absolute (95% CI) |           |            |
| da Costa 2019        |              |              |               |              |             |                      |                      |            | None reported     |                   |           | CRITICAL   |

CI: confidence interval; SMD: standardised mean difference

- a. Total participants <800
- b. 95% CI of an SMD extends > 0.5 points in either direction
- c. Not reporting results or SDs

## Local vibration versus no local vibration in rehabilitation after ACLR

Bibliography: Brunetti 2006, Park 2019, Coulondre 2022

| Certainty assessment                                                                          |                  |              |                |              |                             |                      | No of patients  |                    | Effect                                                                                           |                   | Certainty        | Importance |
|-----------------------------------------------------------------------------------------------|------------------|--------------|----------------|--------------|-----------------------------|----------------------|-----------------|--------------------|--------------------------------------------------------------------------------------------------|-------------------|------------------|------------|
| No of studies                                                                                 | Study design     | Risk of bias | Inconsistency  | Indirectness | Imprecision                 | Other considerations | Local vibration | No local vibration | Relative (95% CI)                                                                                | Absolute (95% CI) |                  |            |
| <b>Balance</b>                                                                                |                  |              |                |              |                             |                      |                 |                    |                                                                                                  |                   |                  |            |
| 1                                                                                             |                  |              |                |              |                             |                      |                 |                    |                                                                                                  |                   |                  |            |
| <b>Balance - open eyes center of pressure speed – 4 months post-op</b>                        |                  |              |                |              |                             |                      |                 |                    |                                                                                                  |                   |                  |            |
| 1 Brunetti 2006                                                                               | randomised trial | very serious | not assessable | not serious  | very serious <sup>a,c</sup> | none                 | 15              | 15                 | The authors reported statistically significant improvement in balance in the intervention group. |                   | ⊕○○○<br>Very low | CRITICAL   |
| <b>Balance - open eyes center of pressure speed – 10 months post-op</b>                       |                  |              |                |              |                             |                      |                 |                    |                                                                                                  |                   |                  |            |
| 1 Brunetti 2006                                                                               | randomised trial | very serious | not assessable | not serious  | very serious <sup>a,c</sup> | none                 | 15              | 15                 | The authors reported statistically significant improvement in balance in the intervention group. |                   | ⊕○○○<br>Very low | CRITICAL   |
| <b>Balance - closed eyes center of pressure speed – 4 months post-op</b>                      |                  |              |                |              |                             |                      |                 |                    |                                                                                                  |                   |                  |            |
| 1 Brunetti 2006                                                                               | randomised trial | very serious | not assessable | not serious  | very serious <sup>a,c</sup> | none                 | 15              | 15                 | The authors reported statistically significant improvement in balance in the intervention group. |                   | ⊕○○○<br>Very low | CRITICAL   |
| <b>Balance - closed eyes center of pressure speed 10 months post-op</b>                       |                  |              |                |              |                             |                      |                 |                    |                                                                                                  |                   |                  |            |
| 1 Brunetti 2006                                                                               | randomised trial | very serious | not assessable | not serious  | very serious <sup>a,c</sup> | none                 | 15              | 15                 | The authors reported statistically significant improvement in balance in the intervention group. |                   | ⊕○○○<br>Very low | CRITICAL   |
| <b>Balance - open eyes elliptic area – 4 months post-op</b>                                   |                  |              |                |              |                             |                      |                 |                    |                                                                                                  |                   |                  |            |
| 1 Brunetti 2006                                                                               | randomised trial | very serious | not assessable | not serious  | very serious <sup>a,c</sup> | none                 | 15              | 15                 | The authors reported statistically significant improvement in balance in the intervention group. |                   | ⊕○○○<br>Very low | CRITICAL   |
| <b>Balance - open eyes elliptic area 10 months post-op</b>                                    |                  |              |                |              |                             |                      |                 |                    |                                                                                                  |                   |                  |            |
| 1 Brunetti 2006                                                                               | randomised trial | very serious | not assessable | not serious  | very serious <sup>a,c</sup> | none                 | 15              | 15                 | The authors reported statistically significant improvement in balance in the intervention group. |                   | ⊕○○○<br>Very low | CRITICAL   |
| <b>Balance - closed eyes elliptic area – 4 months post-op</b>                                 |                  |              |                |              |                             |                      |                 |                    |                                                                                                  |                   |                  |            |
| 1 Brunetti 2006                                                                               | randomised trial | very serious | not assessable | not serious  | very serious <sup>a,c</sup> | none                 | 15              | 15                 | The authors reported statistically significant improvement in balance in the intervention group. |                   | ⊕○○○<br>Very low | CRITICAL   |
| <b>Balance - closed eyes elliptic area 10 months post-op</b>                                  |                  |              |                |              |                             |                      |                 |                    |                                                                                                  |                   |                  |            |
| 1 Brunetti 2006                                                                               | randomised trial | very serious | not assessable | not serious  | very serious <sup>a,c</sup> | none                 | 15              | 15                 | The authors reported statistically significant improvement in balance in the intervention group. |                   | ⊕○○○<br>Very low | CRITICAL   |
| <b>Strength</b>                                                                               |                  |              |                |              |                             |                      |                 |                    |                                                                                                  |                   |                  |            |
| 3                                                                                             |                  |              |                |              |                             |                      |                 |                    |                                                                                                  |                   |                  |            |
| <b>Strength - Quadriceps CON 60°/s (better indicated by higher values) – 4 weeks post-op</b>  |                  |              |                |              |                             |                      |                 |                    |                                                                                                  |                   |                  |            |
| 1 Park 2019                                                                                   | randomised trial | serious      | not assessable | not serious  | very serious <sup>a,b</sup> | none                 | 11              | 13                 | SMD 0.64 higher<br>(0.18 lower to 1.47 higher)                                                   |                   | ⊕○○○<br>Very low | CRITICAL   |
| <b>Strength - Quadriceps CON 60°/s (better indicated by higher values) – 8 weeks post-op</b>  |                  |              |                |              |                             |                      |                 |                    |                                                                                                  |                   |                  |            |
| 1 Park 2019                                                                                   | randomised trial | serious      | not assessable | not serious  | very serious <sup>a,b</sup> | none                 | 11              | 13                 | SMD 1.51 higher<br>(0.58 higher to 2.44 higher)                                                  |                   | ⊕○○○<br>Very low | CRITICAL   |
| <b>Strength - Quadriceps ISOM 90° (better indicated by higher values) – 10 weeks post-op</b>  |                  |              |                |              |                             |                      |                 |                    |                                                                                                  |                   |                  |            |
| 1 Coulondre 2022                                                                              | randomised trial | very serious | not assessable | not serious  | very serious <sup>a,b</sup> | none                 | 11              | 12                 | SMD 1.13 higher<br>(0.24 higher to 2.02 higher)                                                  |                   | ⊕○○○<br>Very low | CRITICAL   |
| <b>Strength - Quadriceps CON 60°/s (better indicated by higher values) – 4 months post-op</b> |                  |              |                |              |                             |                      |                 |                    |                                                                                                  |                   |                  |            |

| Certainty assessment                                                                                |                     |                 |                   |                |                                |                      | No of patients  |                    | Effect                                                              |                   | Certainty        | Importance |
|-----------------------------------------------------------------------------------------------------|---------------------|-----------------|-------------------|----------------|--------------------------------|----------------------|-----------------|--------------------|---------------------------------------------------------------------|-------------------|------------------|------------|
| No of studies                                                                                       | Study design        | Risk of bias    | Inconsistency     | Indirectness   | Imprecision                    | Other considerations | Local vibration | No local vibration | Relative (95% CI)                                                   | Absolute (95% CI) |                  |            |
| 1<br>Brunetti<br>2006                                                                               | randomised<br>trial | very<br>serious | not<br>assessable | not<br>serious | very<br>serious <sup>a,b</sup> | none                 | 15              | 15                 | SMD 3.8 higher<br>(2.54 higher to 5.05 higher)                      |                   | ⊕○○○<br>Very low | CRITICAL   |
| <b>Strength - Quadriceps CON 60°/s (better indicated by higher values) – 10 months post-op</b>      |                     |                 |                   |                |                                |                      |                 |                    |                                                                     |                   |                  |            |
| 1<br>Brunetti<br>2006                                                                               | randomised<br>trial | very<br>serious | not<br>assessable | not<br>serious | very<br>serious <sup>a,b</sup> | none                 | 15              | 15                 | SMD 3.11 higher<br>(2 higher to 4.21 higher)                        |                   | ⊕○○○<br>Very low | CRITICAL   |
| <b>Strength - Hamstring CON 60°/s (better indicated by higher values) – 4 weeks post-op</b>         |                     |                 |                   |                |                                |                      |                 |                    |                                                                     |                   |                  |            |
| 1<br>Park 2019                                                                                      | randomised<br>trial | serious         | not<br>assessable | not<br>serious | very<br>serious <sup>a,b</sup> | none                 | 11              | 13                 | SMD 1.58 higher<br>(0.64 higher to 2.52 higher)                     |                   | ⊕○○○<br>Very low | CRITICAL   |
| <b>Strength - Hamstring CON 60°/s (better indicated by higher values) – 8 weeks post-op</b>         |                     |                 |                   |                |                                |                      |                 |                    |                                                                     |                   |                  |            |
| 1<br>Park 2019                                                                                      | randomised<br>trial | serious         | not<br>assessable | not<br>serious | very<br>serious <sup>a,b</sup> | none                 | 11              | 13                 | SMD 1.08 higher<br>(0.21 higher to 1.95 higher)                     |                   | ⊕○○○<br>Very low | CRITICAL   |
| <b>Patient reported outcome measures (PROM)</b>                                                     |                     |                 |                   |                |                                |                      |                 |                    |                                                                     |                   |                  |            |
| 2                                                                                                   |                     |                 |                   |                |                                |                      |                 |                    |                                                                     |                   |                  |            |
| <b>PROM - IKDC 4m</b>                                                                               |                     |                 |                   |                |                                |                      |                 |                    |                                                                     |                   |                  |            |
| 1<br>Brunetti<br>2006                                                                               | randomised<br>trial | very<br>serious | not<br>assessable | not<br>serious | very<br>serious <sup>a,c</sup> | none                 | 15              | 15                 | The authors reported better<br>scores in the intervention<br>group. |                   | ⊕○○○<br>Very low | CRITICAL   |
| <b>PROM - IKDC 10m</b>                                                                              |                     |                 |                   |                |                                |                      |                 |                    |                                                                     |                   |                  |            |
| 1<br>Brunetti<br>2006                                                                               | randomised<br>trial | very<br>serious | not<br>assessable | not<br>serious | very<br>serious <sup>a,c</sup> | none                 | 15              | 15                 | The authors reported better<br>scores in the intervention<br>group. |                   | ⊕○○○<br>Very low | CRITICAL   |
| <b>PROM – SF-36 4m</b>                                                                              |                     |                 |                   |                |                                |                      |                 |                    |                                                                     |                   |                  |            |
| 1<br>Brunetti<br>2006                                                                               | randomised<br>trial | very<br>serious | not<br>assessable | not<br>serious | very<br>serious <sup>a,c</sup> | none                 | 15              | 15                 | The authors reported better<br>scores in the intervention<br>group. |                   | ⊕○○○<br>Very low | CRITICAL   |
| <b>PROM - SF-36 10m</b>                                                                             |                     |                 |                   |                |                                |                      |                 |                    |                                                                     |                   |                  |            |
| 1<br>Brunetti<br>2006                                                                               | randomised<br>trial | very<br>serious | not<br>assessable | not<br>serious | very<br>serious <sup>a,c</sup> | none                 | 15              | 15                 | The authors reported better<br>scores in the intervention<br>group. |                   | ⊕○○○<br>Very low | CRITICAL   |
| <b>PROM - anxiety (VAS) (better indicated by lower values) – 8 weeks post-op</b>                    |                     |                 |                   |                |                                |                      |                 |                    |                                                                     |                   |                  |            |
| 1<br>Park 2019                                                                                      | randomised<br>trial | very<br>serious | not<br>assessable | not<br>serious | very<br>serious <sup>a,b</sup> | none                 | 11              | 11                 | SMD 0.59 lower<br>(1.45 lower to 0.27 higher)                       |                   | ⊕○○○<br>Very low | IMPORTANT  |
| <b>PROM - symptoms (VAS) (better indicated by lower values) – 8 weeks post-op</b>                   |                     |                 |                   |                |                                |                      |                 |                    |                                                                     |                   |                  |            |
| 1<br>Park 2019                                                                                      | randomised<br>trial | very<br>serious | not<br>assessable | not<br>serious | very<br>serious <sup>a,b</sup> | none                 | 11              | 11                 | SMD 1.48 lower<br>(2.44 lower to 0.51 lower)                        |                   | ⊕○○○<br>Very low | CRITICAL   |
| <b>Functional activities</b>                                                                        |                     |                 |                   |                |                                |                      |                 |                    |                                                                     |                   |                  |            |
| 1                                                                                                   |                     |                 |                   |                |                                |                      |                 |                    |                                                                     |                   |                  |            |
| <b>Functional - Timed Up and Go test (s) (better indicated by lower values) – 10 weeks post-op</b>  |                     |                 |                   |                |                                |                      |                 |                    |                                                                     |                   |                  |            |
| 1<br>Coulondre<br>2022                                                                              | randomised<br>trial | very<br>serious | not<br>assessable | not<br>serious | very<br>serious <sup>a,b</sup> | none                 | 11              | 12                 | SMD 0.24 lower<br>(1.06 lower to 0.59 higher)                       |                   | ⊕○○○<br>Very low | IMPORTANT  |
| <b>Functional – Six Minute Walk Test (m) (better indicated by higher values) – 10 weeks post-op</b> |                     |                 |                   |                |                                |                      |                 |                    |                                                                     |                   |                  |            |
| 1<br>Coulondre<br>2022                                                                              | randomised<br>trial | very<br>serious | not<br>assessable | not<br>serious | very<br>serious <sup>a,b</sup> | none                 | 11              | 12                 | SMD 0.2 lower<br>(1.02 lower to 0.62 higher)                        |                   | ⊕○○○<br>Very low | IMPORTANT  |
| <b>Range of motion (ROM)</b>                                                                        |                     |                 |                   |                |                                |                      |                 |                    |                                                                     |                   |                  |            |
| 1                                                                                                   |                     |                 |                   |                |                                |                      |                 |                    |                                                                     |                   |                  |            |
| <b>ROM - knee range of motion (better indicated by higher values) – 4 weeks post-op</b>             |                     |                 |                   |                |                                |                      |                 |                    |                                                                     |                   |                  |            |
| 1<br>Park 2019                                                                                      | randomised<br>trial | serious         | not<br>assessable | not<br>serious | very<br>serious <sup>a,b</sup> | none                 | 11              | 13                 | SMD 1.92 higher<br>(0.92 higher to 2.92 higher)                     |                   | ⊕○○○<br>Very low | IMPORTANT  |
| <b>ROM – knee range of motion (better indicated by higher values) – 8 weeks post-op</b>             |                     |                 |                   |                |                                |                      |                 |                    |                                                                     |                   |                  |            |

| Certainty assessment                                                          |                  |              |                |              |                              |                      | No of patients  |                    | Effect                                                                                                                   |                   | Certainty        | Importance |
|-------------------------------------------------------------------------------|------------------|--------------|----------------|--------------|------------------------------|----------------------|-----------------|--------------------|--------------------------------------------------------------------------------------------------------------------------|-------------------|------------------|------------|
| No of studies                                                                 | Study design     | Risk of bias | Inconsistency  | Indirectness | Imprecision                  | Other considerations | Local vibration | No local vibration | Relative (95% CI)                                                                                                        | Absolute (95% CI) |                  |            |
| 1<br>Park 2019                                                                | randomised trial | serious      | not assessable | not serious  | very serious <sup>a, b</sup> | none                 | 11              | 13                 | SMD 1.55 higher<br>(0.61 higher to 2.48 higher)                                                                          |                   | ⊕○○○<br>Very low | IMPORTANT  |
| <b>Pain</b>                                                                   |                  |              |                |              |                              |                      |                 |                    |                                                                                                                          |                   |                  |            |
| 1                                                                             |                  |              |                |              |                              |                      |                 |                    |                                                                                                                          |                   |                  |            |
| <b>Pain - pain (VAS) (better indicated by lower values) – 8 weeks post-op</b> |                  |              |                |              |                              |                      |                 |                    |                                                                                                                          |                   |                  |            |
| 1<br>Park 2019                                                                | randomised trial | very serious | not assessable | not serious  | very serious <sup>a, b</sup> | none                 | 11              | 11                 | SMD 2.04 lower<br>(3.11 lower to 0.97 lower)                                                                             |                   | ⊕○○○<br>Very low | CRITICAL   |
| <b>Adverse events</b>                                                         |                  |              |                |              |                              |                      |                 |                    |                                                                                                                          |                   |                  |            |
| Brunetti<br>2006                                                              |                  |              |                |              |                              |                      |                 |                    | "Patients receiving vibration did not report any signs of discomfort during the treatment and, in 16 out of 20 subjects" |                   |                  | CRITICAL   |
| Park 2019                                                                     |                  |              |                |              |                              |                      |                 |                    | None reported                                                                                                            |                   |                  | CRITICAL   |
| Coulondre<br>2022                                                             |                  |              |                |              |                              |                      |                 |                    | None reported                                                                                                            |                   |                  | CRITICAL   |

CI: confidence interval; SMD: standardised mean difference

Inconsistency  $I^2 > 75\%$  serious

- a. Total participants <800
- b. 95% CI of an SMD extends > 0.5 points in either direction
- c. Not reporting results or SDs

## Early mobilisation versus delayed mobilisation in rehabilitation after ACLR

Bibliography: Haggmark 1979, Henriksson 2002, Hiemstra 2009, Ito 2007, Noyes 1987, Isberg 2006, Vadala 2007, Christensen 2013

| Certainty assessment                                                                                     |                   |              |                                     |              |                              |                      | № of patients      |                      | Effect                                                                                                                                                                                                                                                                                                                                                             |                   | Certainty | Importance |
|----------------------------------------------------------------------------------------------------------|-------------------|--------------|-------------------------------------|--------------|------------------------------|----------------------|--------------------|----------------------|--------------------------------------------------------------------------------------------------------------------------------------------------------------------------------------------------------------------------------------------------------------------------------------------------------------------------------------------------------------------|-------------------|-----------|------------|
| № of studies                                                                                             | Study design      | Risk of bias | Inconsistency                       | Indirectness | Imprecision                  | Other considerations | Early mobilisation | Delayed mobilisation | Relative (95% CI)                                                                                                                                                                                                                                                                                                                                                  | Absolute (95% CI) |           |            |
| <b>Range of motion (ROM)</b>                                                                             |                   |              |                                     |              |                              |                      |                    |                      |                                                                                                                                                                                                                                                                                                                                                                    |                   |           |            |
| 7                                                                                                        |                   |              |                                     |              |                              |                      |                    |                      |                                                                                                                                                                                                                                                                                                                                                                    |                   |           |            |
| <b>ROM - flexion (better indicated by higher values) – 1 week post-op</b>                                |                   |              |                                     |              |                              |                      |                    |                      |                                                                                                                                                                                                                                                                                                                                                                    |                   |           |            |
| 1<br>Noyes 1987                                                                                          | randomised trial  | very serious | not assessable                      | not serious  | very serious <sup>a, b</sup> | none                 | 9                  | 9                    | SMD 0.37 higher<br>(0.57 lower to 1.3 higher)                                                                                                                                                                                                                                                                                                                      | ⊕○○○<br>Very low  |           | CRITICAL   |
| <b>ROM - flexion (better indicated by higher values) – 2 weeks post-op</b>                               |                   |              |                                     |              |                              |                      |                    |                      |                                                                                                                                                                                                                                                                                                                                                                    |                   |           |            |
| 1<br>Noyes 1987                                                                                          | randomised trial  | very serious | not assessable                      | not serious  | very serious <sup>a, b</sup> | none                 | 9                  | 9                    | SMD 0.72 higher<br>(0.24 lower to 1.68 higher)                                                                                                                                                                                                                                                                                                                     | ⊕○○○<br>Very low  |           | CRITICAL   |
| <b>ROM - flexion (better indicated by higher values) – 3 weeks post-op</b>                               |                   |              |                                     |              |                              |                      |                    |                      |                                                                                                                                                                                                                                                                                                                                                                    |                   |           |            |
| 2<br>Noyes 1987<br>Hiemstra 2009                                                                         | randomised trials | very serious | very serious<br>I <sup>2</sup> =85% | not serious  | very serious <sup>a, b</sup> | none                 | 49                 | 51                   | SMD 0.34 higher<br>(1.09 lower to 1.77 higher)                                                                                                                                                                                                                                                                                                                     | ⊕○○○<br>Very low  |           | CRITICAL   |
| <b>ROM - flexion (better indicated by higher values) – 1 month post-op</b>                               |                   |              |                                     |              |                              |                      |                    |                      |                                                                                                                                                                                                                                                                                                                                                                    |                   |           |            |
| 1<br>Noyes 1987                                                                                          | randomised trial  | very serious | not assessable                      | not serious  | very serious <sup>a, b</sup> | none                 | 9                  | 9                    | SMD 0.93 higher<br>(0.05 lower to 1.92 higher)                                                                                                                                                                                                                                                                                                                     | ⊕○○○<br>Very low  |           | CRITICAL   |
| <b>ROM - knee flexion difference between limbs (better indicated by lower values) – 3 months post-op</b> |                   |              |                                     |              |                              |                      |                    |                      |                                                                                                                                                                                                                                                                                                                                                                    |                   |           |            |
| 1<br>Christensen 2013                                                                                    | randomised trial  | very serious | not assessable                      | not serious  | very serious <sup>a, b</sup> | none                 | 17                 | 16                   | SMD 0.08 lower<br>(0.76 lower to 0.6 higher)                                                                                                                                                                                                                                                                                                                       | ⊕○○○<br>Very low  |           | CRITICAL   |
| <b>ROM - knee flexion difference between limbs (better indicated by lower values) – 6 months post-op</b> |                   |              |                                     |              |                              |                      |                    |                      |                                                                                                                                                                                                                                                                                                                                                                    |                   |           |            |
| 1<br>Christensen 2013                                                                                    | randomised trial  | very serious | not assessable                      | not serious  | very serious <sup>a, b</sup> | none                 | 17                 | 16                   | SMD 0.01 higher<br>(0.67 lower to 0.7 higher)                                                                                                                                                                                                                                                                                                                      | ⊕○○○<br>Very low  |           | CRITICAL   |
| Henriksson 2002                                                                                          | randomised trial  | very serious | not assessable                      | not serious  | very serious <sup>a, c</sup> | none                 | 24                 | 24                   | The authors reported no statistically significant difference between the two groups.                                                                                                                                                                                                                                                                               | ⊕○○○<br>Very low  |           | CRITICAL   |
| Isberg 2006                                                                                              | randomised trial  | very serious | not assessable                      | not serious  | very serious <sup>a, c</sup> | none                 | 11                 | 11                   | The authors reported no statistically significant difference between the two groups.                                                                                                                                                                                                                                                                               | ⊕○○○<br>Very low  |           | CRITICAL   |
| <b>ROM - knee flexion – 1 year post-op</b>                                                               |                   |              |                                     |              |                              |                      |                    |                      |                                                                                                                                                                                                                                                                                                                                                                    |                   |           |            |
| Haggmark 1979                                                                                            | randomised trial  | very serious | not assessable                      | not serious  | very serious <sup>a, c</sup> | none                 | 8                  | 8                    | "Patients with a movable cast brace regained full range of motion of the knee joint faster than did the group with a cylinder cast. The group with a cylinder cast regained full range of motion at a slower pace. On an average, it took 16 weeks for this group to achieve the same range of motion as the group with a cast brace had obtained within 8 weeks." | ⊕○○○<br>Very low  |           | CRITICAL   |
| Henriksson 2002                                                                                          | randomised trial  | very serious | not assessable                      | not serious  | very serious <sup>a, c</sup> | none                 | 23                 | 24                   | The authors reported no statistically significant difference between the two groups.                                                                                                                                                                                                                                                                               | ⊕○○○<br>Very low  |           | CRITICAL   |
| <b>ROM - knee flexion – 2 years post-op</b>                                                              |                   |              |                                     |              |                              |                      |                    |                      |                                                                                                                                                                                                                                                                                                                                                                    |                   |           |            |
| Henriksson 2002                                                                                          | randomised trial  | very serious | not assessable                      | not serious  | very serious <sup>a, c</sup> | none                 | 22                 | 23                   | The authors reported no statistically significant difference between the two groups.                                                                                                                                                                                                                                                                               | ⊕○○○<br>Very low  |           | CRITICAL   |

| Certainty assessment                                                                                       |                  |              |                |              |                             |                      | No of patients     |                      | Effect                                                                               |                                                          | Certainty        | Importance |
|------------------------------------------------------------------------------------------------------------|------------------|--------------|----------------|--------------|-----------------------------|----------------------|--------------------|----------------------|--------------------------------------------------------------------------------------|----------------------------------------------------------|------------------|------------|
| No of studies                                                                                              | Study design     | Risk of bias | Inconsistency  | Indirectness | Imprecision                 | Other considerations | Early mobilisation | Delayed mobilisation | Relative (95% CI)                                                                    | Absolute (95% CI)                                        |                  |            |
| Isberg 2006                                                                                                | randomised trial | very serious | not assessable | not serious  | very serious <sup>a,c</sup> | none                 | 11                 | 11                   | The authors reported no statistically significant difference between the two groups. |                                                          | ⊕○○○<br>Very low | CRITICAL   |
| <b>ROM - extension (better indicated by lower values) – 1 week post-op</b>                                 |                  |              |                |              |                             |                      |                    |                      |                                                                                      |                                                          |                  |            |
| 1<br>Noyes 1987                                                                                            | randomised trial | very serious | not assessable | not serious  | very serious <sup>a,b</sup> | none                 | 9                  | 9                    | SMD <b>0.38 lower</b><br>(1.31 lower to 0.55 higher)                                 |                                                          | ⊕○○○<br>Very low | CRITICAL   |
| <b>ROM - extension (better indicated by lower values) – 2 weeks post-op</b>                                |                  |              |                |              |                             |                      |                    |                      |                                                                                      |                                                          |                  |            |
| 1<br>Noyes 1987                                                                                            | randomised trial | very serious | not assessable | not serious  | very serious <sup>a,b</sup> | none                 | 9                  | 9                    | SMD <b>1.18 lower</b><br>(2.2 lower to 0.16 lower)                                   |                                                          | ⊕○○○<br>Very low | CRITICAL   |
| <b>ROM - extension (better indicated by lower values) – 3 weeks post-op</b>                                |                  |              |                |              |                             |                      |                    |                      |                                                                                      |                                                          |                  |            |
| 1<br>Noyes 1987                                                                                            | randomised trial | very serious | not assessable | not serious  | very serious <sup>a,b</sup> | none                 | 9                  | 9                    | SMD <b>0.5 lower</b><br>(1.44 lower to 0.44 higher)                                  |                                                          | ⊕○○○<br>Very low | CRITICAL   |
| <b>ROM - extension (better indicated by lower values) – 1 month post-op</b>                                |                  |              |                |              |                             |                      |                    |                      |                                                                                      |                                                          |                  |            |
| 1<br>Noyes 1987                                                                                            | randomised trial | very serious | not assessable | not serious  | very serious <sup>a,b</sup> | none                 | 9                  | 9                    | SMD <b>0.34 lower</b><br>(1.28 lower to 0.59 higher)                                 |                                                          | ⊕○○○<br>Very low | CRITICAL   |
| <b>ROM - knee extension difference between limbs (better indicated by lower values) – 3 months post-op</b> |                  |              |                |              |                             |                      |                    |                      |                                                                                      |                                                          |                  |            |
| 1<br>Christensen 2013                                                                                      | randomised trial | very serious | not assessable | not serious  | very serious <sup>a,b</sup> | none                 | 17                 | 16                   | SMD <b>0.53 lower</b><br>(1.22 lower to 0.17 higher)                                 |                                                          | ⊕○○○<br>Very low | CRITICAL   |
| <b>ROM - knee extension difference between limbs (better indicated by lower values) – 6 months post-op</b> |                  |              |                |              |                             |                      |                    |                      |                                                                                      |                                                          |                  |            |
| 1<br>Christensen 2013                                                                                      | randomised trial | very serious | not assessable | not serious  | very serious <sup>a,b</sup> | none                 | 17                 | 16                   | SMD <b>0.56 lower</b><br>(1.26 lower to 0.13 higher)                                 |                                                          | ⊕○○○<br>Very low | CRITICAL   |
| Henriksson 2002                                                                                            | randomised trial | very serious | not assessable | not serious  | very serious <sup>a,c</sup> | none                 | 23                 | 24                   | The authors reported no statistically significant difference between the two groups. |                                                          | ⊕○○○<br>Very low | CRITICAL   |
| Isberg 2006                                                                                                | randomised trial | very serious | not assessable | not serious  | very serious <sup>a,c</sup> | none                 | 11                 | 11                   | The authors reported no statistically significant difference between the two groups. |                                                          | ⊕○○○<br>Very low | CRITICAL   |
| <b>ROM-flexion achieved full flexion at 10m</b>                                                            |                  |              |                |              |                             |                      |                    |                      |                                                                                      |                                                          |                  |            |
| 1<br>Vadala 2007                                                                                           | randomised trial | very serious | not assessable | not serious  | serious <sup>a</sup>        | none                 | 17/18 (94.4%)      | 21/23 (91.3%)        | RR <b>1.03</b><br>(0.87 to 1.22)                                                     | <b>27 more per 1,000</b><br>(from 119 fewer to 201 more) | ⊕○○○<br>Very low | CRITICAL   |
| <b>ROM - knee extension – 1 year post-op</b>                                                               |                  |              |                |              |                             |                      |                    |                      |                                                                                      |                                                          |                  |            |
| Henriksson 2002                                                                                            | randomised trial | very serious | not assessable | not serious  | very serious <sup>a,c</sup> | none                 | 23                 | 24                   | The authors reported no statistically significant difference between the two groups. |                                                          | ⊕○○○<br>Very low | CRITICAL   |
| <b>ROM - knee extension – 2 years post-op</b>                                                              |                  |              |                |              |                             |                      |                    |                      |                                                                                      |                                                          |                  |            |
| Henriksson 2002                                                                                            | randomised trial | very serious | not assessable | not serious  | very serious <sup>a,c</sup> | none                 | 33                 | 34                   | The authors reported no statistically significant difference between the two groups. |                                                          | ⊕○○○<br>Very low | CRITICAL   |
| Isberg 2006                                                                                                | randomised trial | very serious | not assessable | not serious  | very serious <sup>a,c</sup> | none                 | 11                 | 11                   | The authors reported no statistically significant difference between the two groups. |                                                          | ⊕○○○<br>Very low | CRITICAL   |
| <b>Pain</b>                                                                                                |                  |              |                |              |                             |                      |                    |                      |                                                                                      |                                                          |                  |            |
| 2                                                                                                          |                  |              |                |              |                             |                      |                    |                      |                                                                                      |                                                          |                  |            |
| <b>Pain - VAS scale (better indicated by lower values) – 1 hour post-op</b>                                |                  |              |                |              |                             |                      |                    |                      |                                                                                      |                                                          |                  |            |
| 1<br>Hiemstra 2009                                                                                         | randomised trial | very serious | not assessable | not serious  | serious <sup>a</sup>        | none                 | 40                 | 42                   | SMD <b>0.04 higher</b><br>(0.4 lower to 0.47 higher)                                 |                                                          | ⊕○○○<br>Very low | CRITICAL   |
| <b>Pain - VAS scale (better indicated by lower values) – 12 hours post-op</b>                              |                  |              |                |              |                             |                      |                    |                      |                                                                                      |                                                          |                  |            |

| Certainty assessment                                                                                      |                  |              |                |              |             |                      | No of patients     |                      | Effect                                         |                   | Certainty        | Importance |
|-----------------------------------------------------------------------------------------------------------|------------------|--------------|----------------|--------------|-------------|----------------------|--------------------|----------------------|------------------------------------------------|-------------------|------------------|------------|
| No of studies                                                                                             | Study design     | Risk of bias | Inconsistency  | Indirectness | Imprecision | Other considerations | Early mobilisation | Delayed mobilisation | Relative (95% CI)                              | Absolute (95% CI) |                  |            |
| 1<br>Hiemstra 2009                                                                                        | randomised trial | very serious | not assessable | not serious  | serious *   | none                 | 40                 | 42                   | SMD 0.07 higher<br>(0.37 lower to 0.5 higher)  |                   | ⊕○○○<br>Very low | CRITICAL   |
| <b>Pain - VAS scale (better indicated by lower values) – 24 hours post-op</b>                             |                  |              |                |              |             |                      |                    |                      |                                                |                   |                  |            |
| 1<br>Hiemstra 2009                                                                                        | randomised trial | very serious | not assessable | not serious  | serious *   | none                 | 40                 | 42                   | SMD 0.21 lower<br>(0.65 lower to 0.22 higher)  |                   | ⊕○○○<br>Very low | CRITICAL   |
| <b>Pain - VAS scale (better indicated by lower values) – 36 hours post-op</b>                             |                  |              |                |              |             |                      |                    |                      |                                                |                   |                  |            |
| 1<br>Hiemstra 2009                                                                                        | randomised trial | very serious | not assessable | not serious  | serious *   | none                 | 40                 | 42                   | SMD 0.16 higher<br>(0.28 lower to 0.59 higher) |                   | ⊕○○○<br>Very low | CRITICAL   |
| <b>Pain - VAS scale (better indicated by lower values) – 2 days post-op</b>                               |                  |              |                |              |             |                      |                    |                      |                                                |                   |                  |            |
| 1<br>Hiemstra 2009                                                                                        | randomised trial | very serious | not assessable | not serious  | serious *   | none                 | 40                 | 42                   | SMD 0.23 lower<br>(0.67 lower to 0.2 higher)   |                   | ⊕○○○<br>Very low | CRITICAL   |
| <b>Pain - VAS scale (better indicated by lower values) – 2.5 days post-op</b>                             |                  |              |                |              |             |                      |                    |                      |                                                |                   |                  |            |
| 1<br>Hiemstra 2009                                                                                        | randomised trial | very serious | not assessable | not serious  | serious *   | none                 | 42                 | 42                   | SMD 0.12 higher<br>(0.31 lower to 0.55 higher) |                   | ⊕○○○<br>Very low | CRITICAL   |
| <b>Pain - VAS scale (better indicated by lower values) – 7 days post-op</b>                               |                  |              |                |              |             |                      |                    |                      |                                                |                   |                  |            |
| 1<br>Hiemstra 2009                                                                                        | randomised trial | very serious | not assessable | not serious  | serious *   | none                 | 40                 | 42                   | SMD 0.09 lower<br>(0.52 lower to 0.35 higher)  |                   | ⊕○○○<br>Very low | CRITICAL   |
| <b>Pain - VAS scale (better indicated by lower values) – 2 weeks post-op</b>                              |                  |              |                |              |             |                      |                    |                      |                                                |                   |                  |            |
| 1<br>Hiemstra 2009                                                                                        | randomised trial | very serious | not assessable | not serious  | serious *   | none                 | 40                 | 42                   | SMD 0.08 higher<br>(0.36 lower to 0.51 higher) |                   | ⊕○○○<br>Very low | CRITICAL   |
| <b>Pain - medication used oral opioids (better indicated by lower values) – 12 hour post-op</b>           |                  |              |                |              |             |                      |                    |                      |                                                |                   |                  |            |
| 1<br>Hiemstra 2009                                                                                        | randomised trial | very serious | not assessable | not serious  | serious *   | none                 | 40                 | 42                   | SMD 0.06 lower<br>(0.49 lower to 0.38 higher)  |                   | ⊕○○○<br>Very low | CRITICAL   |
| <b>Pain - medication used oral anti-inflammatory (better indicated by lower values) – 12 hour post-op</b> |                  |              |                |              |             |                      |                    |                      |                                                |                   |                  |            |
| 1<br>Hiemstra 2009                                                                                        | randomised trial | very serious | not assessable | not serious  | serious *   | none                 | 40                 | 42                   | SMD 0.12 lower<br>(0.55 lower to 0.32 higher)  |                   | ⊕○○○<br>Very low | CRITICAL   |
| <b>Pain - medication used oral opioids (better indicated by lower values) – 1 day post-op</b>             |                  |              |                |              |             |                      |                    |                      |                                                |                   |                  |            |
| 1<br>Hiemstra 2009                                                                                        | randomised trial | very serious | not assessable | not serious  | serious *   | none                 | 40                 | 42                   | SMD 0.41 lower<br>(0.85 lower to 0.03 higher)  |                   | ⊕○○○<br>Very low | CRITICAL   |
| <b>Pain - medication used oral anti-inflammatory (better indicated by lower values) – 1 day post-op</b>   |                  |              |                |              |             |                      |                    |                      |                                                |                   |                  |            |
| 1<br>Hiemstra 2009                                                                                        | randomised trial | very serious | not assessable | not serious  | serious *   | none                 | 40                 | 42                   | SMD 0.12 lower<br>(0.55 lower to 0.31 higher)  |                   | ⊕○○○<br>Very low | CRITICAL   |
| <b>Pain - medication used Tylenol (better indicated by lower values) – 1 day post-op</b>                  |                  |              |                |              |             |                      |                    |                      |                                                |                   |                  |            |
| 1<br>Hiemstra 2009                                                                                        | randomised trial | very serious | not assessable | not serious  | serious *   | none                 | 40                 | 42                   | SMD 0.21 higher<br>(0.22 lower to 0.65 higher) |                   | ⊕○○○<br>Very low | CRITICAL   |
| <b>Pain - medication used oral opioids (better indicated by lower values) – 2 days post-op</b>            |                  |              |                |              |             |                      |                    |                      |                                                |                   |                  |            |
| 1<br>Hiemstra 2009                                                                                        | randomised trial | very serious | not assessable | not serious  | serious *   | none                 | 40                 | 42                   | SMD 0.22 lower<br>(0.66 lower to 0.21 higher)  |                   | ⊕○○○<br>Very low | CRITICAL   |
| <b>Pain - medication used oral anti-inflammatory (better indicated by lower values) – 2 days post-op</b>  |                  |              |                |              |             |                      |                    |                      |                                                |                   |                  |            |
| 1<br>Hiemstra 2009                                                                                        | randomised trial | very serious | not assessable | not serious  | serious *   | none                 | 40                 | 42                   | SMD 0.06 lower<br>(0.49 lower to 0.37 higher)  |                   | ⊕○○○<br>Very low | CRITICAL   |
| <b>Pain - medication used Tylenol (better indicated by lower values) – 2 days post-op</b>                 |                  |              |                |              |             |                      |                    |                      |                                                |                   |                  |            |
| 1<br>Hiemstra 2009                                                                                        | randomised trial | very serious | not assessable | not serious  | serious *   | none                 | 40                 | 42                   | SMD 0.22 higher<br>(0.21 lower to 0.66 higher) |                   | ⊕○○○<br>Very low | CRITICAL   |
| <b>Pain - medication used – frequency of pain medication during hospital stay (3d)</b>                    |                  |              |                |              |             |                      |                    |                      |                                                |                   |                  |            |

| Certainty assessment                                                                                          |                   |              |                                     |              |                              |                      | No of patients     |                      | Effect                                                                                                     |                   | Certainty        | Importance |
|---------------------------------------------------------------------------------------------------------------|-------------------|--------------|-------------------------------------|--------------|------------------------------|----------------------|--------------------|----------------------|------------------------------------------------------------------------------------------------------------|-------------------|------------------|------------|
| No of studies                                                                                                 | Study design      | Risk of bias | Inconsistency                       | Indirectness | Imprecision                  | Other considerations | Early mobilisation | Delayed mobilisation | Relative (95% CI)                                                                                          | Absolute (95% CI) |                  |            |
| Noyes 1987                                                                                                    | randomised trial  | very serious | not assessable                      | not serious  | very serious <sup>a, c</sup> | none                 | 9                  | 9                    | SDs are not reported. The authors reported no statistically significant difference between the two groups. |                   | ⊕○○○<br>Very low | CRITICAL   |
| <b>Pain - medication used oral opioids (better indicated by lower values) – 1 week post-op</b>                |                   |              |                                     |              |                              |                      |                    |                      |                                                                                                            |                   |                  |            |
| 1 Hiemstra 2009                                                                                               | randomised trial  | very serious | not assessable                      | not serious  | serious <sup>a</sup>         | none                 | 40                 | 42                   | SMD 0.19 higher<br>(0.24 lower to 0.62 higher)                                                             |                   | ⊕○○○<br>Very low | CRITICAL   |
| <b>Pain - medication used oral anti-inflammatory (better indicated by lower values) – 1 week post-op</b>      |                   |              |                                     |              |                              |                      |                    |                      |                                                                                                            |                   |                  |            |
| 1 Hiemstra 2009                                                                                               | randomised trial  | very serious | not assessable                      | not serious  | serious <sup>a</sup>         | none                 | 40                 | 42                   | SMD 0<br>(0.43 lower to 0.43 higher)                                                                       |                   | ⊕○○○<br>Very low | CRITICAL   |
| <b>Pain - medication used Tylenol (better indicated by lower values) – 1 week post-op</b>                     |                   |              |                                     |              |                              |                      |                    |                      |                                                                                                            |                   |                  |            |
| 1 Hiemstra 2009                                                                                               | randomised trial  | very serious | not assessable                      | not serious  | serious <sup>a</sup>         | none                 | 40                 | 42                   | SMD 0.29 lower<br>(0.72 lower to 0.15 higher)                                                              |                   | ⊕○○○<br>Very low | CRITICAL   |
| <b>Pain - medication used oral opioids (better indicated by lower values) – 2 weeks post-op</b>               |                   |              |                                     |              |                              |                      |                    |                      |                                                                                                            |                   |                  |            |
| 1 Hiemstra 2009                                                                                               | randomised trial  | very serious | not assessable                      | not serious  | serious <sup>b</sup>         | none                 | 40                 | 42                   | SMD 0.07 higher<br>(0.37 lower to 0.5 higher)                                                              |                   | ⊕○○○<br>Very low | CRITICAL   |
| <b>Pain - medication used oral anti-inflammatory (better indicated by lower values) – 2 weeks post-op</b>     |                   |              |                                     |              |                              |                      |                    |                      |                                                                                                            |                   |                  |            |
| 1 Hiemstra 2009                                                                                               | randomised trial  | very serious | not assessable                      | not serious  | serious <sup>a</sup>         | none                 | 40                 | 42                   | SMD 0.16 lower<br>(0.6 lower to 0.27 higher)                                                               |                   | ⊕○○○<br>Very low | CRITICAL   |
| <b>Pain - medication used Tylenol (better indicated by lower values) – 2 weeks post-op</b>                    |                   |              |                                     |              |                              |                      |                    |                      |                                                                                                            |                   |                  |            |
| 1 Hiemstra 2009                                                                                               | randomised trial  | very serious | not assessable                      | not serious  | serious <sup>a</sup>         | none                 | 40                 | 42                   | SMD 0.36 lower<br>(0.80 lower to 0.07 higher)                                                              |                   | ⊕○○○<br>Very low | CRITICAL   |
| <b>Laxity</b>                                                                                                 |                   |              |                                     |              |                              |                      |                    |                      |                                                                                                            |                   |                  |            |
| 7                                                                                                             |                   |              |                                     |              |                              |                      |                    |                      |                                                                                                            |                   |                  |            |
| <b>Laxity - laxity (better indicated by lower values) – 3 months post-op</b>                                  |                   |              |                                     |              |                              |                      |                    |                      |                                                                                                            |                   |                  |            |
| 2 Christensen 2013 Ito 2007                                                                                   | randomised trials | very serious | not serious<br>I <sup>2</sup> =0%   | not serious  | serious <sup>a</sup>         | none                 | 32                 | 31                   | SMD 0.29 higher<br>(0.21 lower to 0.79 higher)                                                             |                   | ⊕○○○<br>Very low | CRITICAL   |
| Noyes 1987                                                                                                    | randomised trial  | very serious | not assessable                      | not serious  | very serious <sup>a, c</sup> | none                 | 9                  | 9                    | SDs are not reported. The authors reported no statistically significant difference between the two groups. |                   | ⊕○○○<br>Very low | CRITICAL   |
| <b>Laxity - (better indicated by lower values) – 6 months post-op</b>                                         |                   |              |                                     |              |                              |                      |                    |                      |                                                                                                            |                   |                  |            |
| 3 Henriksson 2002 Isberg 2006 Ito 2007                                                                        | randomised trials | very serious | very serious<br>I <sup>2</sup> =83% | not serious  | very serious <sup>a, b</sup> | none                 | 50                 | 50                   | SMD 0.25 lower<br>(1.28 lower to 0.77 higher)                                                              |                   | ⊕○○○<br>Very low | CRITICAL   |
| <b>Laxity – laxity using radiostereometric analysis (better indicated by lower values) – 6 months post-op</b> |                   |              |                                     |              |                              |                      |                    |                      |                                                                                                            |                   |                  |            |
| Isberg 2006                                                                                                   | randomised trial  | very serious | not assessable                      | not serious  | very serious <sup>a, b</sup> | none                 | 11                 | 11                   | SMD 0.50 higher<br>(0.35 lower to 1.35 higher)                                                             |                   | ⊕○○○<br>Very low | CRITICAL   |
| <b>Laxity - laxity (better indicated by lower values) – 1 year post-op</b>                                    |                   |              |                                     |              |                              |                      |                    |                      |                                                                                                            |                   |                  |            |
| 2 Henriksson 2002 Ito 2007                                                                                    | randomised trials | very serious | not serious<br>I <sup>2</sup> =2%   | not serious  | serious <sup>a</sup>         | none                 | 38                 | 39                   | SMD 0.37 higher<br>(0.09 lower to 0.83 higher)                                                             |                   | ⊕○○○<br>Very low | CRITICAL   |
| Noyes 1987                                                                                                    | randomised trial  | very serious | not assessable                      | not serious  | very serious <sup>a, c</sup> | none                 | 9                  | 9                    | SDs are not reported. The authors reported no statistically significant difference between the two groups. |                   | ⊕○○○<br>Very low | CRITICAL   |
| <b>Stability - stability O'Donoghue – 9-12 months post-op</b>                                                 |                   |              |                                     |              |                              |                      |                    |                      |                                                                                                            |                   |                  |            |

| Certainty assessment                                                                                         |                      |              |                                    |              |                              |                      | No of patients     |                      | Effect                                                                               |                   | Certainty        | Importance |
|--------------------------------------------------------------------------------------------------------------|----------------------|--------------|------------------------------------|--------------|------------------------------|----------------------|--------------------|----------------------|--------------------------------------------------------------------------------------|-------------------|------------------|------------|
| No of studies                                                                                                | Study design         | Risk of bias | Inconsistency                      | Indirectness | Imprecision                  | Other considerations | Early mobilisation | Delayed mobilisation | Relative (95% CI)                                                                    | Absolute (95% CI) |                  |            |
| 1<br>Haggmark<br>1979                                                                                        | randomised<br>trial  | very serious | not assessable                     | not serious  | very serious <sup>a, b</sup> | none                 | 8                  | 8                    | SMD 0.16 higher<br>(0.82 lower to 1.14 higher)                                       |                   | ⊕○○○<br>Very low | CRITICAL   |
| <b>Laxity - laxity (better indicated by lower values) – 2 years post-op</b>                                  |                      |              |                                    |              |                              |                      |                    |                      |                                                                                      |                   |                  |            |
| 2<br>Henriksson<br>2002<br>Isberg 2006                                                                       | randomised<br>trials | very serious | not serious<br>I <sup>2</sup> =4%  | not serious  | serious <sup>a</sup>         | none                 | 33                 | 34                   | SMD 0.32 higher<br>(0.18 lower to 0.82 higher)                                       |                   | ⊕○○○<br>Very low | CRITICAL   |
| <b>Laxity - laxity using radiostereometric analysis (better indicated by lower values) – 2 years post-op</b> |                      |              |                                    |              |                              |                      |                    |                      |                                                                                      |                   |                  |            |
| Isberg 2006                                                                                                  | randomised<br>trial  | very serious | not assessable                     | not serious  | very serious <sup>a, b</sup> | none                 | 11                 | 11                   | SMD 0.23 higher<br>(0.61 lower to 1.07 higher)                                       |                   | ⊕○○○<br>Very low | CRITICAL   |
| <b>laxity - laxity femoral tunnel diameter (better indicated by lower values) – 10 months post-op</b>        |                      |              |                                    |              |                              |                      |                    |                      |                                                                                      |                   |                  |            |
| 1<br>Vadala 2007                                                                                             | randomised<br>trial  | very serious | not assessable                     | not serious  | very serious <sup>a, b</sup> | none                 | 18                 | 23                   | SMD 0.81 higher<br>(0.17 higher to 1.45 higher)                                      |                   | ⊕○○○<br>Very low | CRITICAL   |
| <b>laxity - laxity tibial tunnel diameter (better indicated by lower values) – 10 months post-op</b>         |                      |              |                                    |              |                              |                      |                    |                      |                                                                                      |                   |                  |            |
| 1<br>Vadala 2007                                                                                             | randomised<br>trial  | very serious | not assessable                     | not serious  | very serious <sup>a, b</sup> | none                 | 18                 | 23                   | SMD 0.78 higher<br>(0.13 higher to 1.42 higher)                                      |                   | ⊕○○○<br>Very low | CRITICAL   |
| <b>Patient reported outcomes (PROM)</b>                                                                      |                      |              |                                    |              |                              |                      |                    |                      |                                                                                      |                   |                  |            |
| 4                                                                                                            |                      |              |                                    |              |                              |                      |                    |                      |                                                                                      |                   |                  |            |
| <b>PROM – Lysholm scale – 3 months post-op</b>                                                               |                      |              |                                    |              |                              |                      |                    |                      |                                                                                      |                   |                  |            |
| 1<br>Ito 2007                                                                                                | randomised<br>trial  | very serious | not assessable                     | not serious  | very serious <sup>a, c</sup> | none                 | 15                 | 15                   | The authors reported no statistically significant difference between the two groups. |                   | ⊕○○○<br>Very low | CRITICAL   |
| <b>PROM - Lysholm scale – 3 months post-op</b>                                                               |                      |              |                                    |              |                              |                      |                    |                      |                                                                                      |                   |                  |            |
| 1<br>Ito 2007                                                                                                | randomised<br>trial  | very serious | not assessable                     | not serious  | very serious <sup>a, c</sup> | none                 | 15                 | 15                   | The authors reported no statistically significant difference between the two groups. |                   | ⊕○○○<br>Very low | CRITICAL   |
| <b>PROM - IKDC scale (better indicated by higher values) – 3 months post-op</b>                              |                      |              |                                    |              |                              |                      |                    |                      |                                                                                      |                   |                  |            |
| 1<br>Christensen<br>2013                                                                                     | randomised<br>trial  | very serious | not assessable                     | not serious  | very serious <sup>a, b</sup> | none                 | 17                 | 16                   | SMD 0.97 higher<br>(0.25 higher to 1.7 higher)                                       |                   | ⊕○○○<br>Very low | CRITICAL   |
| <b>PROM - IKDC scale (better indicated by higher values) – 6 months post-op</b>                              |                      |              |                                    |              |                              |                      |                    |                      |                                                                                      |                   |                  |            |
| 1<br>Christensen<br>2013                                                                                     | randomised<br>trial  | very serious | not assessable                     | not serious  | very serious <sup>a, b</sup> | none                 | 17                 | 16                   | SMD 0.71 higher<br>(0.01 higher to 1.42 higher)                                      |                   | ⊕○○○<br>Very low | CRITICAL   |
| <b>PROM - Lysholm scale (better indicated by higher values) – 1 year post-op</b>                             |                      |              |                                    |              |                              |                      |                    |                      |                                                                                      |                   |                  |            |
| 1<br>Henriksson<br>2002                                                                                      | randomised<br>trial  | very serious | not assessable                     | not serious  | very serious <sup>a, b</sup> | none                 | 23                 | 24                   | SMD 0.17 higher<br>(0.4 lower to 0.74 higher)                                        |                   | ⊕○○○<br>Very low | CRITICAL   |
| Ito 2007                                                                                                     | randomised<br>trial  | very serious | not assessable                     | not serious  | very serious <sup>a, c</sup> | none                 | 15                 | 15                   | The authors reported no statistically significant difference between the two groups. |                   | ⊕○○○<br>Very low | CRITICAL   |
| <b>PROM - Tegner scale (better indicated by higher values) – 1 year post-op</b>                              |                      |              |                                    |              |                              |                      |                    |                      |                                                                                      |                   |                  |            |
| 1<br>Henriksson<br>2002                                                                                      | randomised<br>trial  | very serious | not assessable                     | not serious  | very serious <sup>a, b</sup> | none                 | 23                 | 24                   | SMD 0.31 higher<br>(0.26 lower to 0.89 higher)                                       |                   | ⊕○○○<br>Very low | CRITICAL   |
| <b>PROM - Lysholm scale (better indicated by higher values) – 2 years post-op</b>                            |                      |              |                                    |              |                              |                      |                    |                      |                                                                                      |                   |                  |            |
| 2<br>Henriksson<br>2002<br>Isberg 2006                                                                       | randomised<br>trials | very serious | serious<br>I <sup>2</sup> =71%     | not serious  | very serious <sup>a, b</sup> | none                 | 33                 | 34                   | SMD 0.12 higher<br>(0.83 lower to 1.07 higher)                                       |                   | ⊕○○○<br>Very low | CRITICAL   |
| <b>PROM – Tegner scale (better indicated by higher values) – 2 years post-op</b>                             |                      |              |                                    |              |                              |                      |                    |                      |                                                                                      |                   |                  |            |
| 2<br>Henriksson<br>2002<br>Isberg 2006                                                                       | randomised<br>trials | very serious | not serious<br>I <sup>2</sup> =25% | not serious  | very serious <sup>a, b</sup> | none                 | 33                 | 34                   | SMD 0.08 lower<br>(0.65 lower to 0.49 higher)                                        |                   | ⊕○○○<br>Very low | CRITICAL   |
| <b>Swelling</b>                                                                                              |                      |              |                                    |              |                              |                      |                    |                      |                                                                                      |                   |                  |            |

| Certainty assessment                                                                                                       |                   |              |                                   |              |                             |                      | No of patients     |                      | Effect                                         |                   | Certainty | Importance |
|----------------------------------------------------------------------------------------------------------------------------|-------------------|--------------|-----------------------------------|--------------|-----------------------------|----------------------|--------------------|----------------------|------------------------------------------------|-------------------|-----------|------------|
| No of studies                                                                                                              | Study design      | Risk of bias | Inconsistency                     | Indirectness | Imprecision                 | Other considerations | Early mobilisation | Delayed mobilisation | Relative (95% CI)                              | Absolute (95% CI) |           |            |
| 1                                                                                                                          |                   |              |                                   |              |                             |                      |                    |                      |                                                |                   |           |            |
| <b>Swelling - (better indicated by lower values) – 1 week post-op</b>                                                      |                   |              |                                   |              |                             |                      |                    |                      |                                                |                   |           |            |
| 1<br>Noyes 1987                                                                                                            | randomised trial  | very serious | not assessable                    | not serious  | very serious <sup>a,b</sup> | none                 | 9                  | 9                    | SMD 0.07 higher<br>(0.86 lower to 0.99 higher) | ⊕○○○<br>Very low  |           | CRITICAL   |
| <b>Swelling - (better indicated by lower values) – 2 weeks post-op</b>                                                     |                   |              |                                   |              |                             |                      |                    |                      |                                                |                   |           |            |
| 1<br>Noyes 1987                                                                                                            | randomised trial  | very serious | not assessable                    | not serious  | very serious <sup>a,b</sup> | none                 | 9                  | 9                    | SMD 0.29 lower<br>(1.22 lower to 0.64 higher)  | ⊕○○○<br>Very low  |           | CRITICAL   |
| <b>Swelling - (better indicated by lower values) – 3 weeks post-op</b>                                                     |                   |              |                                   |              |                             |                      |                    |                      |                                                |                   |           |            |
| 1<br>Noyes 1987                                                                                                            | randomised trial  | very serious | not assessable                    | not serious  | very serious <sup>a,b</sup> | none                 | 9                  | 9                    | SMD 0.52 lower<br>(1.47 lower to 0.42 higher)  | ⊕○○○<br>Very low  |           | CRITICAL   |
| <b>Swelling - (better indicated by lower values) – 4 weeks post-op</b>                                                     |                   |              |                                   |              |                             |                      |                    |                      |                                                |                   |           |            |
| 1<br>Noyes 1987                                                                                                            | randomised trial  | very serious | not assessable                    | not serious  | very serious <sup>a,b</sup> | none                 | 9                  | 9                    | SMD 0.56 lower<br>(1.51 lower to 0.38 higher)  | ⊕○○○<br>Very low  |           | CRITICAL   |
| <b>Atrophy</b>                                                                                                             |                   |              |                                   |              |                             |                      |                    |                      |                                                |                   |           |            |
| 2                                                                                                                          |                   |              |                                   |              |                             |                      |                    |                      |                                                |                   |           |            |
| <b>atrophy - thigh circumference difference 15cm above patella (better indicated by lower values) – 1 week post-op</b>     |                   |              |                                   |              |                             |                      |                    |                      |                                                |                   |           |            |
| 1<br>Noyes 1987                                                                                                            | randomised trial  | very serious | not assessable                    | not serious  | very serious <sup>a,b</sup> | none                 | 9                  | 9                    | SMD 0.21 higher<br>(0.72 lower to 1.14 higher) | ⊕○○○<br>Very low  |           | IMPORTANT  |
| <b>atrophy - thigh circumference difference 15cm above patella (better indicated by lower values) – 2 weeks post-op</b>    |                   |              |                                   |              |                             |                      |                    |                      |                                                |                   |           |            |
| 1<br>Noyes 1987                                                                                                            | randomised trial  | very serious | not assessable                    | not serious  | very serious <sup>a,b</sup> | none                 | 9                  | 9                    | SMD 0.37 higher<br>(0.56 lower to 1.31 higher) | ⊕○○○<br>Very low  |           | IMPORTANT  |
| <b>atrophy - thigh circumference difference 15cm above patella (better indicated by lower values) – 3 weeks post-op</b>    |                   |              |                                   |              |                             |                      |                    |                      |                                                |                   |           |            |
| 1<br>Noyes 1987                                                                                                            | randomised trial  | very serious | not assessable                    | not serious  | very serious <sup>a,b</sup> | none                 | 9                  | 9                    | SMD 0.3 higher<br>(0.63 lower to 1.23 higher)  | ⊕○○○<br>Very low  |           | IMPORTANT  |
| <b>atrophy - thigh circumference difference 15cm above patella (better indicated by lower values) – 4 weeks post-op</b>    |                   |              |                                   |              |                             |                      |                    |                      |                                                |                   |           |            |
| 1<br>Noyes 1987                                                                                                            | randomised trial  | very serious | not assessable                    | not serious  | very serious <sup>a,b</sup> | none                 | 9                  | 9                    | SMD 0.36 higher<br>(0.58 lower to 1.29 higher) | ⊕○○○<br>Very low  |           | IMPORTANT  |
| <b>atrophy - vastus lateralis cross-sectional area difference (better indicated by lower values) – 5 weeks post-op</b>     |                   |              |                                   |              |                             |                      |                    |                      |                                                |                   |           |            |
| 1<br>Haggmark 1979                                                                                                         | randomised trial  | very serious | not assessable                    | not serious  | very serious <sup>a,b</sup> | none                 | 8                  | 8                    | SMD 1.53 lower<br>(2.68 lower to 0.37 lower)   | ⊕○○○<br>Very low  |           | IMPORTANT  |
| <b>Strength</b>                                                                                                            |                   |              |                                   |              |                             |                      |                    |                      |                                                |                   |           |            |
| 3                                                                                                                          |                   |              |                                   |              |                             |                      |                    |                      |                                                |                   |           |            |
| <b>Strength - leg press isometric test difference between limbs (better indicated by higher values) – 3 months post-op</b> |                   |              |                                   |              |                             |                      |                    |                      |                                                |                   |           |            |
| 1<br>Christensen 2013                                                                                                      | randomised trial  | very serious | not assessable                    | not serious  | very serious <sup>a,b</sup> | none                 | 17                 | 16                   | SMD 0.64 higher<br>(0.06 lower to 1.35 higher) | ⊕○○○<br>Very low  |           | IMPORTANT  |
| <b>Strength – Quadriceps CON 60°/s (better indicated by higher values) – 6 months post-op</b>                              |                   |              |                                   |              |                             |                      |                    |                      |                                                |                   |           |            |
| 2<br>Henriksson 2002<br>Ito 2007                                                                                           | randomised trials | very serious | not serious<br>I <sup>2</sup> =0% | not serious  | serious <sup>a</sup>        | none                 | 39                 | 39                   | SMD 0.23 higher<br>(0.22 lower to 0.68 higher) | ⊕○○○<br>Very low  |           | IMPORTANT  |
| <b>Strength - Quadriceps CON 60°/s (better indicated by higher values) – 1 year post-op</b>                                |                   |              |                                   |              |                             |                      |                    |                      |                                                |                   |           |            |
| 2<br>Henriksson 2002<br>Ito 2007                                                                                           | randomised trials | very serious | not serious<br>I <sup>2</sup> =0% | not serious  | serious <sup>a</sup>        | none                 | 38                 | 39                   | SMD 0.08 higher<br>(0.37 lower to 0.53 higher) | ⊕○○○<br>Very low  |           | IMPORTANT  |
| <b>Strength - Quadriceps CON 60°/s (better indicated by higher values) – 2 years post-op</b>                               |                   |              |                                   |              |                             |                      |                    |                      |                                                |                   |           |            |
| 1<br>Henriksson 2002                                                                                                       | randomised trial  | very serious | not assessable                    | not serious  | very serious <sup>a,b</sup> | none                 | 22                 | 23                   | SMD 0.13 higher<br>(0.45 lower to 0.72 higher) | ⊕○○○<br>Very low  |           | IMPORTANT  |
| <b>Strength - Hamstring CON 60°/s (better indicated by higher values) – 6 months post-op</b>                               |                   |              |                                   |              |                             |                      |                    |                      |                                                |                   |           |            |

| Certainty assessment                                                                                  |                   |              |                                   |              |                              |                      | No of patients     |                      | Effect                                                                                                                                                                                                                                                                                                                                                                                           |                   | Certainty        | Importance |
|-------------------------------------------------------------------------------------------------------|-------------------|--------------|-----------------------------------|--------------|------------------------------|----------------------|--------------------|----------------------|--------------------------------------------------------------------------------------------------------------------------------------------------------------------------------------------------------------------------------------------------------------------------------------------------------------------------------------------------------------------------------------------------|-------------------|------------------|------------|
| No of studies                                                                                         | Study design      | Risk of bias | Inconsistency                     | Indirectness | Imprecision                  | Other considerations | Early mobilisation | Delayed mobilisation | Relative (95% CI)                                                                                                                                                                                                                                                                                                                                                                                | Absolute (95% CI) |                  |            |
| 2<br>Henriksson 2002<br>Ito 2007                                                                      | randomised trials | very serious | not serious<br>I <sup>2</sup> =0% | not serious  | serious <sup>a</sup>         | none                 | 39                 | 39                   | SMD 0.09 higher<br>(0.35 lower to 0.53 higher)                                                                                                                                                                                                                                                                                                                                                   |                   | ⊕○○○<br>Very low | IMPORTANT  |
| <b>Strength - Hamstring CON 60°/s (better indicated by higher values) – 1 year post-op</b>            |                   |              |                                   |              |                              |                      |                    |                      |                                                                                                                                                                                                                                                                                                                                                                                                  |                   |                  |            |
| 2<br>Henriksson 2002<br>Ito 2007                                                                      | randomised trials | very serious | not serious<br>I <sup>2</sup> =0% | not serious  | serious <sup>a</sup>         | none                 | 38                 | 39                   | SMD 0.02 lower<br>(0.46 lower to 0.43 higher)                                                                                                                                                                                                                                                                                                                                                    |                   | ⊕○○○<br>Very low | IMPORTANT  |
| <b>Strength - Hamstring CON 60°/s (better indicated by higher values) – 2 years post-op</b>           |                   |              |                                   |              |                              |                      |                    |                      |                                                                                                                                                                                                                                                                                                                                                                                                  |                   |                  |            |
| 1<br>Henriksson 2002                                                                                  | randomised trial  | very serious | not assessable                    | not serious  | very serious <sup>a, b</sup> | none                 | 22                 | 23                   | SMD 0.14 higher<br>(0.45 lower to 0.72 higher)                                                                                                                                                                                                                                                                                                                                                   |                   | ⊕○○○<br>Very low | IMPORTANT  |
| <b>Functional activities</b>                                                                          |                   |              |                                   |              |                              |                      |                    |                      |                                                                                                                                                                                                                                                                                                                                                                                                  |                   |                  |            |
| 1                                                                                                     |                   |              |                                   |              |                              |                      |                    |                      |                                                                                                                                                                                                                                                                                                                                                                                                  |                   |                  |            |
| <b>Functional - single leg hop for distance (better indicated by higher values) – 2 years post-op</b> |                   |              |                                   |              |                              |                      |                    |                      |                                                                                                                                                                                                                                                                                                                                                                                                  |                   |                  |            |
| 1<br>Isberg 2006                                                                                      | randomised trial  | very serious | not assessable                    | not serious  | very serious <sup>a, b</sup> | none                 | 11                 | 11                   | SMD 0.16 higher<br>(0.68 lower to 1 higher)                                                                                                                                                                                                                                                                                                                                                      |                   | ⊕○○○<br>Very low | IMPORTANT  |
| <b>Proprioception</b>                                                                                 |                   |              |                                   |              |                              |                      |                    |                      |                                                                                                                                                                                                                                                                                                                                                                                                  |                   |                  |            |
| 1                                                                                                     |                   |              |                                   |              |                              |                      |                    |                      |                                                                                                                                                                                                                                                                                                                                                                                                  |                   |                  |            |
| <b>Proprioception – joint position sense – 3 months post-op</b>                                       |                   |              |                                   |              |                              |                      |                    |                      |                                                                                                                                                                                                                                                                                                                                                                                                  |                   |                  |            |
| 1<br>Ito 2007                                                                                         | randomised trial  | very serious | not assessable                    | not serious  | very serious <sup>a, c</sup> | none                 | 15                 | 15                   | The authors reported no statistically significant difference between the two groups.                                                                                                                                                                                                                                                                                                             |                   | ⊕○○○<br>Very low | IMPORTANT  |
| <b>Proprioception - joint position sense – 6 months post-op</b>                                       |                   |              |                                   |              |                              |                      |                    |                      |                                                                                                                                                                                                                                                                                                                                                                                                  |                   |                  |            |
| 1<br>Ito 2007                                                                                         | randomised trial  | very serious | not assessable                    | not serious  | very serious <sup>a, c</sup> | none                 | 15                 | 15                   | The authors reported no statistically significant difference between the two groups.                                                                                                                                                                                                                                                                                                             |                   | ⊕○○○<br>Very low | IMPORTANT  |
| <b>Proprioception - joint position sense (better indicated by lower values) – 1 year post-op</b>      |                   |              |                                   |              |                              |                      |                    |                      |                                                                                                                                                                                                                                                                                                                                                                                                  |                   |                  |            |
| 1<br>Ito 2007                                                                                         | randomised trial  | very serious | not assessable                    | not serious  | very serious <sup>a, b</sup> | none                 | 15                 | 15                   | SMD 0.08 higher<br>(0.64 lower to 0.8 higher)                                                                                                                                                                                                                                                                                                                                                    |                   | ⊕○○○<br>Very low | IMPORTANT  |
| <b>Adverse events</b>                                                                                 |                   |              |                                   |              |                              |                      |                    |                      |                                                                                                                                                                                                                                                                                                                                                                                                  |                   |                  |            |
| Hiemstra 2009                                                                                         |                   |              |                                   |              |                              |                      |                    |                      | Six patients (7.3%) were documented as experiencing a complication postoperatively. Five patients (4 immobilizer, 1 nonimmobilizer) were seen by an emergency or family physician with diagnosed cellulitis/periostitis and were treated with antibiotics with resolution of their symptoms. One patient (nonimmobilizer) presented with a hematoma at the harvest site that resolved with time. |                   |                  | CRITICAL   |
| Haggmark 1979                                                                                         |                   |              |                                   |              |                              |                      |                    |                      | None reported                                                                                                                                                                                                                                                                                                                                                                                    |                   |                  | CRITICAL   |
| Henriksson 2002                                                                                       |                   |              |                                   |              |                              |                      |                    |                      | None reported                                                                                                                                                                                                                                                                                                                                                                                    |                   |                  | CRITICAL   |
| Ito 2007                                                                                              |                   |              |                                   |              |                              |                      |                    |                      | None reported                                                                                                                                                                                                                                                                                                                                                                                    |                   |                  | CRITICAL   |
| Noyes 1987                                                                                            |                   |              |                                   |              |                              |                      |                    |                      | None reported                                                                                                                                                                                                                                                                                                                                                                                    |                   |                  | CRITICAL   |
| Isberg 2006                                                                                           |                   |              |                                   |              |                              |                      |                    |                      | None reported                                                                                                                                                                                                                                                                                                                                                                                    |                   |                  | CRITICAL   |
| Vadala 2007                                                                                           |                   |              |                                   |              |                              |                      |                    |                      | None reported                                                                                                                                                                                                                                                                                                                                                                                    |                   |                  | CRITICAL   |
| Christensen 2013                                                                                      |                   |              |                                   |              |                              |                      |                    |                      | None reported                                                                                                                                                                                                                                                                                                                                                                                    |                   |                  | CRITICAL   |

**CI:** confidence interval; **SMD:** standardised mean difference; **RR:** risk ratio

- a. Total participants <800
- b. 95% CI of an SMD extends > 0.5 points in either direction
- c. Not reporting results or SDs
- d. 95% CI boundaries cross the arbitrary thresholds of 0.75 and 1.25

## Immediate weight-bearing versus delayed weight-bearing in rehabilitation after ACLR

Bibliography: Tyler 1998

| Certainty assessment                                                                                                    |                  |              |                |              |                             |                      | No of patients           |                        | Effect                                                                                                    |                                                      | Certainty        | Importance |
|-------------------------------------------------------------------------------------------------------------------------|------------------|--------------|----------------|--------------|-----------------------------|----------------------|--------------------------|------------------------|-----------------------------------------------------------------------------------------------------------|------------------------------------------------------|------------------|------------|
| No of studies                                                                                                           | Study design     | Risk of bias | Inconsistency  | Indirectness | Imprecision                 | Other considerations | Immediate weight-bearing | Delayed weight-bearing | Relative (95% CI)                                                                                         | Absolute (95% CI)                                    |                  |            |
| <b>ROM</b>                                                                                                              |                  |              |                |              |                             |                      |                          |                        |                                                                                                           |                                                      |                  |            |
| 1                                                                                                                       |                  |              |                |              |                             |                      |                          |                        |                                                                                                           |                                                      |                  |            |
| <b>ROM - flexion loss at follow-up (better indicated by lower values) – 1 year post-op</b>                              |                  |              |                |              |                             |                      |                          |                        |                                                                                                           |                                                      |                  |            |
| 1<br>Tyler 1998                                                                                                         | randomised trial | very serious | not assessable | not serious  | very serious <sup>a,b</sup> | none                 | 25                       | 20                     | SMD 0.12 lower<br>(0.71 lower to 0.47 higher)                                                             |                                                      | ⊕○○○<br>Very low | CRITICAL   |
| <b>ROM - number of patients with knee extension deficit &gt;5° at 2 weeks post-op</b>                                   |                  |              |                |              |                             |                      |                          |                        |                                                                                                           |                                                      |                  |            |
| 1<br>Tyler 1998                                                                                                         | randomised trial | very serious | not assessable | not serious  | very serious <sup>a,d</sup> | none                 | 10/27 (37.0%)            | 17/22 (77.3%)          | RR 0.48<br>(0.28 to 0.82)                                                                                 | 402 fewer per 1,000<br>(from 556 fewer to 139 fewer) | ⊕○○○<br>Very low | CRITICAL   |
| <b>ROM - number of patients with knee extension deficit at 1 year post-op</b>                                           |                  |              |                |              |                             |                      |                          |                        |                                                                                                           |                                                      |                  |            |
| 1<br>Tyler 1998                                                                                                         | randomised trial | very serious | not assessable | not serious  | very serious <sup>a,d</sup> | none                 | 5/25 (20%)               | 3/20 (15%)             | RR 1.33<br>(0.36 to 4.92)                                                                                 | 50 more per 1,000<br>(from 96 fewer to 588 more)     | ⊕○○○<br>Very low | CRITICAL   |
| <b>Laxity</b>                                                                                                           |                  |              |                |              |                             |                      |                          |                        |                                                                                                           |                                                      |                  |            |
| 1                                                                                                                       |                  |              |                |              |                             |                      |                          |                        |                                                                                                           |                                                      |                  |            |
| <b>Laxity – laxity difference between limbs measured by KT-1000 (better indicated by lower values) – 1 year post-op</b> |                  |              |                |              |                             |                      |                          |                        |                                                                                                           |                                                      |                  |            |
| 1<br>Tyler 1998                                                                                                         | randomised trial | very serious | not assessable | not serious  | very serious <sup>a,b</sup> | none                 | 25                       | 20                     | SMD 0.03 higher<br>(0.55 lower to 0.62 higher)                                                            |                                                      | ⊕○○○<br>Very low | CRITICAL   |
| <b>Lachman – clinical examination at follow-up – 1 year post-op</b>                                                     |                  |              |                |              |                             |                      |                          |                        |                                                                                                           |                                                      |                  |            |
| Tyler 1998                                                                                                              | randomised trial | very serious | not assessable | not serious  | very serious <sup>a,c</sup> | none                 | 25                       | 20                     | SDs are not reported. The authors reported no statistically significant difference between the two groups |                                                      | ⊕○○○<br>Very low | CRITICAL   |
| <b>Pivot shift – clinical examination at follow-up – 1 year post-op</b>                                                 |                  |              |                |              |                             |                      |                          |                        |                                                                                                           |                                                      |                  |            |
| Tyler 1998                                                                                                              | randomised trial | very serious | not assessable | not serious  | very serious <sup>a,c</sup> | none                 | 25                       | 20                     | SDs are not reported. The authors reported no statistically significant difference between the two groups |                                                      | ⊕○○○<br>Very low | CRITICAL   |
| <b>Patient reported outcomes (PROM)</b>                                                                                 |                  |              |                |              |                             |                      |                          |                        |                                                                                                           |                                                      |                  |            |
| 1                                                                                                                       |                  |              |                |              |                             |                      |                          |                        |                                                                                                           |                                                      |                  |            |
| <b>PROM – Lysholm scale (better indicated by higher values) – 1 year post-op</b>                                        |                  |              |                |              |                             |                      |                          |                        |                                                                                                           |                                                      |                  |            |
| 1<br>Tyler 1998                                                                                                         | randomised trial | very serious | not assessable | not serious  | very serious <sup>a,b</sup> | none                 | 25                       | 20                     | SMD 0.31 higher<br>(0.28 lower to 0.90 higher)                                                            |                                                      | ⊕○○○<br>Very low | CRITICAL   |
| <b>PROM - Tegner (better indicated by higher values) – 1 year post-op</b>                                               |                  |              |                |              |                             |                      |                          |                        |                                                                                                           |                                                      |                  |            |
| 1<br>Tyler 1998                                                                                                         | randomised trial | very serious | not assessable | not serious  | very serious <sup>a,b</sup> | none                 | 25                       | 20                     | SMD 0.49 lower<br>(1.09 lower to 0.11 higher)                                                             |                                                      | ⊕○○○<br>Very low | CRITICAL   |
| <b>Anterior knee pain – number of patients that reported knee pain at 1 year post-op</b>                                |                  |              |                |              |                             |                      |                          |                        |                                                                                                           |                                                      |                  |            |
| Tyler 1998                                                                                                              | randomised trial | very serious | not assessable | not serious  | very serious <sup>a,d</sup> | none                 | 2/25 (8.0%)              | 7/20 (35%)             | RR 0.23<br>(0.05 to 0.98)                                                                                 | 269 fewer per 1,000<br>(from 332 fewer to 7 fewer)   | ⊕○○○<br>Very low | CRITICAL   |
| <b>Adverse events</b>                                                                                                   |                  |              |                |              |                             |                      |                          |                        |                                                                                                           |                                                      |                  |            |
| Tyler 1998                                                                                                              |                  |              |                |              |                             |                      |                          |                        | None reported                                                                                             |                                                      |                  | CRITICAL   |

CI: confidence interval; SMD: standardised mean difference; RR: risk ratio

- a. Total participants <800  
b. 95% CI of an SMD extends > 0.5 points in either direction  
c. Not reporting results or SDs  
d. 95% CI boundaries cross the arbitrary thresholds of 0.75 and 1.25

## Early start of OKC versus delayed start of OKC exercises in rehabilitation after ACLR

Bibliography: Heijne 2007, Fukuda 2013

| Certainty assessment                                                                          |                  |              |                |              |                             |                      | № of patients      |                   | Effect                                         |                   | Certainty        | Importance |
|-----------------------------------------------------------------------------------------------|------------------|--------------|----------------|--------------|-----------------------------|----------------------|--------------------|-------------------|------------------------------------------------|-------------------|------------------|------------|
| № of studies                                                                                  | Study design     | Risk of bias | Inconsistency  | Indirectness | Imprecision                 | Other considerations | Early start of OKC | Late start of OKC | Relative (95% CI)                              | Absolute (95% CI) |                  |            |
| <b>Strength</b>                                                                               |                  |              |                |              |                             |                      |                    |                   |                                                |                   |                  |            |
| 2                                                                                             |                  |              |                |              |                             |                      |                    |                   |                                                |                   |                  |            |
| <b>Strength – Quadriceps ISOM 60° (better indicated by higher values) – 3 months post-op</b>  |                  |              |                |              |                             |                      |                    |                   |                                                |                   |                  |            |
| 1<br>Fukuda 2013                                                                              | randomised trial | very serious | not assessable | not serious  | very serious <sup>a,b</sup> | none                 | 18                 | 17                | SMD 0.03 lower<br>(0.69 lower to 0.64 higher)  |                   | ⊕○○○<br>Very low | CRITICAL   |
| <b>Strength – Quadriceps CON 90°/s (better indicated by higher values) – 3 months post-op</b> |                  |              |                |              |                             |                      |                    |                   |                                                |                   |                  |            |
| 1<br>Heijne 2007                                                                              | randomised trial | very serious | not assessable | not serious  | very serious <sup>a,b</sup> | none                 | 34                 | 28                | SMD 0.47 lower<br>(0.97 lower to 0.04 higher)  |                   | ⊕○○○<br>Very low | CRITICAL   |
| <b>Strength – Quadriceps ISOM 60° (better indicated by higher values) – 5 months post-op</b>  |                  |              |                |              |                             |                      |                    |                   |                                                |                   |                  |            |
| 1<br>Fukuda 2013                                                                              | randomised trial | very serious | not assessable | not serious  | very serious <sup>a,b</sup> | none                 | 18                 | 17                | SMD 0.37 higher<br>(0.30 lower to 1.04 higher) |                   | ⊕○○○<br>Very low | CRITICAL   |
| <b>Strength – Quadriceps CON 90°/s (better indicated by higher values) – 5 months post-op</b> |                  |              |                |              |                             |                      |                    |                   |                                                |                   |                  |            |
| 1<br>Heijne 2007                                                                              | randomised trial | very serious | not assessable | not serious  | very serious <sup>a,b</sup> | none                 | 29                 | 26                | SMD 0.18 lower<br>(0.71 lower to 0.35 higher)  |                   | ⊕○○○<br>Very low | CRITICAL   |
| <b>Strength – Quadriceps ISOM 60° (better indicated by higher values) – 7 months post-op</b>  |                  |              |                |              |                             |                      |                    |                   |                                                |                   |                  |            |
| 1<br>Fukuda 2013                                                                              | randomised trial | very serious | not assessable | not serious  | very serious <sup>a,b</sup> | none                 | 18                 | 17                | SMD 0.39 higher<br>(0.28 lower to 1.06 higher) |                   | ⊕○○○<br>Very low | CRITICAL   |
| <b>Strength – Quadriceps CON 90°/s (better indicated by higher values) – 7 months post-op</b> |                  |              |                |              |                             |                      |                    |                   |                                                |                   |                  |            |
| 1<br>Heijne 2007                                                                              | randomised trial | very serious | not assessable | not serious  | very serious <sup>a,b</sup> | none                 | 27                 | 27                | SMD 0.05 higher<br>(0.48 lower to 0.58 higher) |                   | ⊕○○○<br>Very low | CRITICAL   |
| <b>Strength – Quadriceps ISOM 60° (better indicated by higher values) – 17 months post-op</b> |                  |              |                |              |                             |                      |                    |                   |                                                |                   |                  |            |
| 1<br>Fukuda 2013                                                                              | randomised trial | very serious | not assessable | not serious  | very serious <sup>a,b</sup> | none                 | 18                 | 17                | SMD 0.46 higher<br>(0.21 lower to 1.14 higher) |                   | ⊕○○○<br>Very low | CRITICAL   |
| <b>Strength – Hamstring ISOM 60° (better indicated by higher values) – 3 months post-op</b>   |                  |              |                |              |                             |                      |                    |                   |                                                |                   |                  |            |
| 1<br>Fukuda 2013                                                                              | randomised trial | very serious | not assessable | not serious  | very serious <sup>a,b</sup> | none                 | 18                 | 17                | SMD 0.25 lower<br>(0.92 lower to 0.41 higher)  |                   | ⊕○○○<br>Very low | CRITICAL   |
| <b>Strength – Hamstring CON 90°/s (better indicated by higher values) – 3 months post-op</b>  |                  |              |                |              |                             |                      |                    |                   |                                                |                   |                  |            |
| 1<br>Heijne 2007                                                                              | randomised trial | very serious | not assessable | not serious  | very serious <sup>a,b</sup> | none                 | 34                 | 28                | SMD 0.11 higher<br>(0.39 lower to 0.61 higher) |                   | ⊕○○○<br>Very low | CRITICAL   |
| <b>Strength – Hamstring ISOM 60° (better indicated by higher values) – 5 months post-op</b>   |                  |              |                |              |                             |                      |                    |                   |                                                |                   |                  |            |
| 1<br>Fukuda 2013                                                                              | randomised trial | very serious | not assessable | not serious  | very serious <sup>a,b</sup> | none                 | 18                 | 17                | SMD 0.37 lower<br>(1.04 lower to 0.30 higher)  |                   | ⊕○○○<br>Very low | CRITICAL   |
| <b>Strength – Hamstring CON 90°/s (better indicated by higher values) – 5 months post-op</b>  |                  |              |                |              |                             |                      |                    |                   |                                                |                   |                  |            |
| 1<br>Heijne 2007                                                                              | randomised trial | very serious | not assessable | not serious  | very serious <sup>a,b</sup> | none                 | 29                 | 26                | SMD 0.12 higher<br>(0.41 lower to 0.65 higher) |                   | ⊕○○○<br>Very low | CRITICAL   |
| <b>Strength – Hamstring ISOM 60° (better indicated by higher values) – 7 months post-op</b>   |                  |              |                |              |                             |                      |                    |                   |                                                |                   |                  |            |
| 1<br>Fukuda 2013                                                                              | randomised trial | very serious | not assessable | not serious  | very serious <sup>a,b</sup> | none                 | 18                 | 17                | SMD 0.19 lower<br>(0.85 lower to 0.48 higher)  |                   | ⊕○○○<br>Very low | CRITICAL   |
| <b>Strength – Hamstring CON 90°/s (better indicated by higher values) – 7 months post-op</b>  |                  |              |                |              |                             |                      |                    |                   |                                                |                   |                  |            |
| 1<br>Heijne 2007                                                                              | randomised trial | very serious | not assessable | not serious  | very serious <sup>a,b</sup> | none                 | 27                 | 27                | SMD 0.16 higher<br>(0.38 lower to 0.69 higher) |                   | ⊕○○○<br>Very low | CRITICAL   |
| <b>Strength – Hamstring ISOM 60° (better indicated by higher values) – 17 months post-op</b>  |                  |              |                |              |                             |                      |                    |                   |                                                |                   |                  |            |
| 1<br>Fukuda 2013                                                                              | randomised trial | very serious | not assessable | not serious  | very serious <sup>a,b</sup> | none                 | 18                 | 17                | SMD 0.49 lower<br>(1.17 lower to 0.18 higher)  |                   | ⊕○○○<br>Very low | CRITICAL   |
| <b>Laxity</b>                                                                                 |                  |              |                |              |                             |                      |                    |                   |                                                |                   |                  |            |

| Certainty assessment                                                                                                       |                   |              |                                   |              |                             |                      | No of patients     |                   | Effect                                                                               |                   | Certainty        | Importance |
|----------------------------------------------------------------------------------------------------------------------------|-------------------|--------------|-----------------------------------|--------------|-----------------------------|----------------------|--------------------|-------------------|--------------------------------------------------------------------------------------|-------------------|------------------|------------|
| No of studies                                                                                                              | Study design      | Risk of bias | Inconsistency                     | Indirectness | Imprecision                 | Other considerations | Early start of OKC | Late start of OKC | Relative (95% CI)                                                                    | Absolute (95% CI) |                  |            |
| 2                                                                                                                          |                   |              |                                   |              |                             |                      |                    |                   |                                                                                      |                   |                  |            |
| <b>Laxity - laxity difference between limbs measured by KT-1000 (better indicated by lower values) – 3 months post-op</b>  |                   |              |                                   |              |                             |                      |                    |                   |                                                                                      |                   |                  |            |
| 2<br>Fukuda 2013<br>Heijne 2007                                                                                            | randomised trials | very serious | not serious<br>I <sup>2</sup> =0% | not serious  | serious <sup>a</sup>        | none                 | 52                 | 45                | SMD 0.29 higher<br>(0.11 lower to 0.69 higher)                                       |                   | ⊕○○○<br>Very low | CRITICAL   |
| <b>Laxity - laxity difference between limbs measured by KT-1000 (better indicated by lower values) – 5 months post-op</b>  |                   |              |                                   |              |                             |                      |                    |                   |                                                                                      |                   |                  |            |
| 2<br>Fukuda 2013<br>Heijne 2007                                                                                            | randomised trials | very serious | not serious<br>I <sup>2</sup> =0% | not serious  | serious <sup>a</sup>        | none                 | 47                 | 43                | SMD 0.37 higher<br>(0.05 lower to 0.79 higher)                                       |                   | ⊕○○○<br>Very low | CRITICAL   |
| <b>Laxity - laxity difference between limbs measured by KT-1000 (better indicated by lower values) – 7 months post-op</b>  |                   |              |                                   |              |                             |                      |                    |                   |                                                                                      |                   |                  |            |
| 2<br>Fukuda 2013<br>Heijne 2007                                                                                            | randomised trials | very serious | not serious<br>I <sup>2</sup> =0% | not serious  | serious <sup>a</sup>        | none                 | 45                 | 44                | SMD 0.24 higher<br>(0.18 lower to 0.66 higher)                                       |                   | ⊕○○○<br>Very low | CRITICAL   |
| <b>Laxity - laxity difference between limbs measured by KT-1000 (better indicated by lower values) – 17 months post-op</b> |                   |              |                                   |              |                             |                      |                    |                   |                                                                                      |                   |                  |            |
| 1<br>Fukuda 2013                                                                                                           | randomised trial  | very serious | not assessable                    | not serious  | very serious <sup>a,b</sup> | none                 | 18                 | 17                | SMD 0.49 lower<br>(1.16 lower to 0.19 higher)                                        |                   | ⊕○○○<br>Very low | CRITICAL   |
| <b>Pain</b>                                                                                                                |                   |              |                                   |              |                             |                      |                    |                   |                                                                                      |                   |                  |            |
| 2                                                                                                                          |                   |              |                                   |              |                             |                      |                    |                   |                                                                                      |                   |                  |            |
| <b>Pain VAS scale (better indicated by lower values) – 3 months post-op</b>                                                |                   |              |                                   |              |                             |                      |                    |                   |                                                                                      |                   |                  |            |
| 1<br>Fukuda 2013                                                                                                           | randomised trial  | very serious | not assessable                    | not serious  | very serious <sup>a,b</sup> | none                 | 18                 | 17                | SMD 0.81 lower<br>(1.5 lower to 0.12 lower)                                          |                   | ⊕○○○<br>Very low | CRITICAL   |
| Heijne 2007                                                                                                                | randomised trial  | very serious | not assessable                    | not serious  | very serious <sup>a,c</sup> | none                 | 34                 | 28                | The authors reported no statistically significant difference between the two groups  |                   | ⊕○○○<br>Very low | CRITICAL   |
| <b>Pain VAS scale (better indicated by lower values) – 5 months post-op</b>                                                |                   |              |                                   |              |                             |                      |                    |                   |                                                                                      |                   |                  |            |
| 1<br>Fukuda 2013                                                                                                           | randomised trial  | very serious | not assessable                    | not serious  | very serious <sup>a,b</sup> | none                 | 18                 | 17                | SMD 0.25 lower<br>(0.92 lower to 0.41 higher)                                        |                   | ⊕○○○<br>Very low | CRITICAL   |
| Heijne 2007                                                                                                                | randomised trial  | very serious | not assessable                    | not serious  | very serious <sup>a,c</sup> | none                 | 34                 | 28                | The authors reported no statistically significant difference between the two groups  |                   | ⊕○○○<br>Very low | CRITICAL   |
| <b>Pain VAS scale (better indicated by lower values) – 7 months post-op</b>                                                |                   |              |                                   |              |                             |                      |                    |                   |                                                                                      |                   |                  |            |
| 1<br>Fukuda 2013                                                                                                           | randomised trial  | very serious | not assessable                    | not serious  | very serious <sup>a,b</sup> | none                 | 18                 | 17                | SMD 0.29 higher<br>(0.38 lower to 0.96 higher)                                       |                   | ⊕○○○<br>Very low | CRITICAL   |
| Heijne 2007                                                                                                                | randomised trial  | very serious | not assessable                    | not serious  | very serious <sup>a,c</sup> | none                 | 34                 | 28                | The authors reported no statistically significant difference between the two groups. |                   | ⊕○○○<br>Very low | CRITICAL   |
| <b>Pain VAS scale (better indicated by lower values) – 17 months post-op</b>                                               |                   |              |                                   |              |                             |                      |                    |                   |                                                                                      |                   |                  |            |
| 1<br>Fukuda 2013                                                                                                           | randomised trial  | very serious | not assessable                    | not serious  | very serious <sup>a,b</sup> | none                 | 18                 | 17                | SMD 0.33 higher<br>(0.34 lower to 1 higher)                                          |                   | ⊕○○○<br>Very low | CRITICAL   |
| <b>Patient reported outcomes (PROM)</b>                                                                                    |                   |              |                                   |              |                             |                      |                    |                   |                                                                                      |                   |                  |            |
| 1                                                                                                                          |                   |              |                                   |              |                             |                      |                    |                   |                                                                                      |                   |                  |            |
| <b>PROM - Lysholm scale (better indicated by higher values) – 3 months post-op</b>                                         |                   |              |                                   |              |                             |                      |                    |                   |                                                                                      |                   |                  |            |
| 1<br>Fukuda 2013                                                                                                           | randomised trial  | very serious | not assessable                    | not serious  | very serious <sup>a,b</sup> | none                 | 18                 | 17                | SMD 0.12 lower<br>(0.78 lower to 0.55 higher)                                        |                   | ⊕○○○<br>Very low | CRITICAL   |
| <b>PROM - Lysholm scale (better indicated by higher values) – 5 months post-op</b>                                         |                   |              |                                   |              |                             |                      |                    |                   |                                                                                      |                   |                  |            |
| 1<br>Fukuda 2013                                                                                                           | randomised trial  | very serious | not assessable                    | not serious  | very serious <sup>a,b</sup> | none                 | 18                 | 17                | SMD 0.12 higher<br>(0.54 lower to 0.78 higher)                                       |                   | ⊕○○○<br>Very low | CRITICAL   |
| <b>PROM - Lysholm scale (better indicated by higher values) – 6 months post-op</b>                                         |                   |              |                                   |              |                             |                      |                    |                   |                                                                                      |                   |                  |            |
| 1<br>Fukuda 2013                                                                                                           | randomised trial  | very serious | not assessable                    | not serious  | very serious <sup>a,b</sup> | none                 | 18                 | 17                | SMD 0.16 higher<br>(0.51 lower to 0.82 higher)                                       |                   | ⊕○○○<br>Very low | CRITICAL   |
| <b>PROM - Lysholm scale (better indicated by higher values) – 17 months post-op</b>                                        |                   |              |                                   |              |                             |                      |                    |                   |                                                                                      |                   |                  |            |

| Certainty assessment                                                                                          |                  |              |                |              |                             |                      | № of patients      |                   | Effect                                                                                                                     |                   | Certainty        | Importance |
|---------------------------------------------------------------------------------------------------------------|------------------|--------------|----------------|--------------|-----------------------------|----------------------|--------------------|-------------------|----------------------------------------------------------------------------------------------------------------------------|-------------------|------------------|------------|
| № of studies                                                                                                  | Study design     | Risk of bias | Inconsistency  | Indirectness | Imprecision                 | Other considerations | Early start of OKC | Late start of OKC | Relative (95% CI)                                                                                                          | Absolute (95% CI) |                  |            |
| 1<br>Fukuda 2013                                                                                              | randomised trial | very serious | not assessable | not serious  | very serious <sup>a,b</sup> | none                 | 18                 | 17                | SMD 0.51 lower<br>(1.19 lower to 0.16 higher)                                                                              |                   | ⊕○○○<br>Very low | CRITICAL   |
| <b>Functional activities</b>                                                                                  |                  |              |                |              |                             |                      |                    |                   |                                                                                                                            |                   |                  |            |
| 1                                                                                                             |                  |              |                |              |                             |                      |                    |                   |                                                                                                                            |                   |                  |            |
| <b>Functional - single leg hop for distance scale (better indicated by higher values) – 3 months post-op</b>  |                  |              |                |              |                             |                      |                    |                   |                                                                                                                            |                   |                  |            |
| 1<br>Fukuda 2013                                                                                              | randomised trial | very serious | not assessable | not serious  | very serious <sup>a,b</sup> | none                 | 18                 | 17                | SMD 0.2 higher<br>(0.46 lower to 0.87 higher)                                                                              |                   | ⊕○○○<br>Very low | IMPORTANT  |
| <b>Functional - crossover hop scale (better indicated by higher values) – 3 months post-op</b>                |                  |              |                |              |                             |                      |                    |                   |                                                                                                                            |                   |                  |            |
| 1<br>Fukuda 2013                                                                                              | randomised trial | very serious | not assessable | not serious  | very serious <sup>a,b</sup> | none                 | 18                 | 17                | SMD 0.2 higher<br>(0.47 lower to 0.86 higher)                                                                              |                   | ⊕○○○<br>Very low | IMPORTANT  |
| <b>Functional - single leg hop for distance scale (better indicated by higher values) – 5 months post-op</b>  |                  |              |                |              |                             |                      |                    |                   |                                                                                                                            |                   |                  |            |
| 1<br>Fukuda 2013                                                                                              | randomised trial | very serious | not assessable | not serious  | very serious <sup>a,b</sup> | none                 | 18                 | 17                | SMD 0.06 higher<br>(0.6 lower to 0.73 higher)                                                                              |                   | ⊕○○○<br>Very low | IMPORTANT  |
| <b>Functional - crossover hop scale (better indicated by higher values) – 5 months post-op</b>                |                  |              |                |              |                             |                      |                    |                   |                                                                                                                            |                   |                  |            |
| 1<br>Fukuda 2013                                                                                              | randomised trial | very serious | not assessable | not serious  | very serious <sup>a,b</sup> | none                 | 18                 | 17                | SMD 0.33 higher<br>(0.33 lower to 1 higher)                                                                                |                   | ⊕○○○<br>Very low | IMPORTANT  |
| <b>Functional - single leg hop for distance scale (better indicated by higher values) – 7 months post-op</b>  |                  |              |                |              |                             |                      |                    |                   |                                                                                                                            |                   |                  |            |
| 1<br>Fukuda 2013                                                                                              | randomised trial | very serious | not assessable | not serious  | very serious <sup>a,b</sup> | none                 | 18                 | 17                | SMD 0.34 lower<br>(1.01 lower to 0.33 higher)                                                                              |                   | ⊕○○○<br>Very low | IMPORTANT  |
| <b>Functional - crossover hop scale (better indicated by higher values) – 7 months post-op</b>                |                  |              |                |              |                             |                      |                    |                   |                                                                                                                            |                   |                  |            |
| 1<br>Fukuda 2013                                                                                              | randomised trial | very serious | not assessable | not serious  | very serious <sup>a,b</sup> | none                 | 18                 | 17                | SMD 0.21 higher<br>(0.46 lower to 0.87 higher)                                                                             |                   | ⊕○○○<br>Very low | IMPORTANT  |
| <b>Functional - single leg hop for distance scale (better indicated by higher values) – 17 months post-op</b> |                  |              |                |              |                             |                      |                    |                   |                                                                                                                            |                   |                  |            |
| 1<br>Fukuda 2013                                                                                              | randomised trial | very serious | not assessable | not serious  | very serious <sup>a,b</sup> | none                 | 18                 | 17                | SMD 0.22 higher<br>(0.45 lower to 0.88 higher)                                                                             |                   | ⊕○○○<br>Very low | IMPORTANT  |
| <b>Functional - crossover hop scale (better indicated by higher values) – 17 months post-op</b>               |                  |              |                |              |                             |                      |                    |                   |                                                                                                                            |                   |                  |            |
| 1<br>Fukuda 2013                                                                                              | randomised trial | very serious | not assessable | not serious  | very serious <sup>a,b</sup> | none                 | 18                 | 17                | SMD 0.34 higher<br>(0.33 lower to 1.01 higher)                                                                             |                   | ⊕○○○<br>Very low | IMPORTANT  |
| <b>Balance</b>                                                                                                |                  |              |                |              |                             |                      |                    |                   |                                                                                                                            |                   |                  |            |
| 1                                                                                                             |                  |              |                |              |                             |                      |                    |                   |                                                                                                                            |                   |                  |            |
| <b>Balance – postural sway – 3 months post-op</b>                                                             |                  |              |                |              |                             |                      |                    |                   |                                                                                                                            |                   |                  |            |
| Heijne 2007                                                                                                   | randomised trial | very serious | not assessable | not serious  | very serious <sup>a,c</sup> | none                 | 34                 | 28                | The authors reported no statistically significant difference between the two groups.                                       |                   | ⊕○○○<br>Very low | IMPORTANT  |
| <b>Balance - postural sway – 5 months post-op</b>                                                             |                  |              |                |              |                             |                      |                    |                   |                                                                                                                            |                   |                  |            |
| Heijne 2007                                                                                                   | randomised trial | very serious | not assessable | not serious  | very serious <sup>a,c</sup> | none                 | 29                 | 26                | The authors reported no statistically significant difference between the two groups.                                       |                   | ⊕○○○<br>Very low | IMPORTANT  |
| <b>Balance - postural sway – 7 months post-op</b>                                                             |                  |              |                |              |                             |                      |                    |                   |                                                                                                                            |                   |                  |            |
| Heijne 2007                                                                                                   | randomised trial | very serious | not assessable | not serious  | very serious <sup>a,c</sup> | none                 | 27                 | 27                | The authors reported no statistically significant difference between the two groups.                                       |                   | ⊕○○○<br>Very low | IMPORTANT  |
| <b>ROM</b>                                                                                                    |                  |              |                |              |                             |                      |                    |                   |                                                                                                                            |                   |                  |            |
| 1                                                                                                             |                  |              |                |              |                             |                      |                    |                   |                                                                                                                            |                   |                  |            |
| <b>Knee flexion and extension</b>                                                                             |                  |              |                |              |                             |                      |                    |                   |                                                                                                                            |                   |                  |            |
| Heijne 2007                                                                                                   | randomised trial | very serious | not assessable | not serious  | very serious <sup>a,c</sup> | none                 | 27                 | 27                | No significant group differences were found in terms of knee extension and knee flexion 3, 5 and 7 months postoperatively. |                   | ⊕○○○<br>Very low | CRITICAL   |
| <b>Adverse events</b>                                                                                         |                  |              |                |              |                             |                      |                    |                   |                                                                                                                            |                   |                  |            |

| Certainty assessment |              |              |               |              |             |                      | No of patients     |                   | Effect            |                   | Certainty | Importance |
|----------------------|--------------|--------------|---------------|--------------|-------------|----------------------|--------------------|-------------------|-------------------|-------------------|-----------|------------|
| No of studies        | Study design | Risk of bias | Inconsistency | Indirectness | Imprecision | Other considerations | Early start of OKC | Late start of OKC | Relative (95% CI) | Absolute (95% CI) |           |            |
| Heijne 2007          |              |              |               |              |             |                      |                    |                   | None reported     |                   |           | CRITICAL   |
| Fukuda 2013          |              |              |               |              |             |                      |                    |                   | None reported     |                   |           | CRITICAL   |

CI: confidence interval; SMD: standardised mean difference

- Total participants <800
- 95% CI of an SMD extends > 0.5 points in either direction
- Not reporting results or SDs
- 95% CI boundaries cross the arbitrary thresholds of 0.75 and 1.25

## Early isometric strengthening versus usual care in rehabilitation after ACLR

Bibliography: Shaw 2005

| Certainty assessment                                                                                                           |                  |                  |                |                |                             |                      | No of patients                |               | Effect                                                                                                                                               |                                                     | Certainty        | Importance |
|--------------------------------------------------------------------------------------------------------------------------------|------------------|------------------|----------------|----------------|-----------------------------|----------------------|-------------------------------|---------------|------------------------------------------------------------------------------------------------------------------------------------------------------|-----------------------------------------------------|------------------|------------|
| No of studies                                                                                                                  | Study design     | Risk of bias     | Inconsistency  | Indirectness   | Imprecision                 | Other considerations | Early isometric strengthening | Usual care    | Relative (95% CI)                                                                                                                                    | Absolute (95% CI)                                   |                  |            |
| <b>Strength</b>                                                                                                                |                  |                  |                |                |                             |                      |                               |               |                                                                                                                                                      |                                                     |                  |            |
| 1                                                                                                                              |                  |                  |                |                |                             |                      |                               |               |                                                                                                                                                      |                                                     |                  |            |
| <b>Strength - Quadriceps CON 60°/s (better indicated by higher values) – 6 months post-op</b>                                  |                  |                  |                |                |                             |                      |                               |               |                                                                                                                                                      |                                                     |                  |            |
| 1                                                                                                                              | Shaw 2005        | randomised trial | very serious   | not assessable | not serious                 | serious <sup>a</sup> | none                          | 55            | 48                                                                                                                                                   | SMD 0.13 lower<br>(0.52 lower to 0.26 higher)       | ⊕○○○<br>Very low | CRITICAL   |
| <b>Strength - Quadriceps ECC 60°/s (better indicated by higher values) – 6 months post-op</b>                                  |                  |                  |                |                |                             |                      |                               |               |                                                                                                                                                      |                                                     |                  |            |
| 1                                                                                                                              | Shaw 2005        | randomised trial | very serious   | not assessable | not serious                 | serious <sup>a</sup> | none                          | 55            | 48                                                                                                                                                   | SMD 0.15 lower<br>(0.54 lower to 0.24 higher)       | ⊕○○○<br>Very low | CRITICAL   |
| <b>Laxity</b>                                                                                                                  |                  |                  |                |                |                             |                      |                               |               |                                                                                                                                                      |                                                     |                  |            |
| <b>Laxity – KT1000 mean difference – 3 months post-op</b>                                                                      |                  |                  |                |                |                             |                      |                               |               |                                                                                                                                                      |                                                     |                  |            |
| Shaw 2005                                                                                                                      | randomised trial | very serious     | not assessable | not serious    | very serious <sup>a,c</sup> | none                 | 55                            | 48            | Authors reported no significant difference between groups.                                                                                           |                                                     | ⊕○○○<br>Very low | CRITICAL   |
| <b>Laxity – KT1000 mean difference – 6 months post-op</b>                                                                      |                  |                  |                |                |                             |                      |                               |               |                                                                                                                                                      |                                                     |                  |            |
| Shaw 2005                                                                                                                      | randomised trial | very serious     | not assessable | not serious    | very serious <sup>a,c</sup> | none                 | 55                            | 48            | Authors reported that a significantly greater proportion of subjects in the "no quadriceps" exercise group demonstrated abnormal laxity at 6 months. |                                                     | ⊕○○○<br>Very low | CRITICAL   |
| <b>Laxity - KT1000 15lb - subjects who displayed abnormal laxity &gt;3mm difference between limbs – 6 months post-op</b>       |                  |                  |                |                |                             |                      |                               |               |                                                                                                                                                      |                                                     |                  |            |
| Shaw 2005                                                                                                                      | randomised trial | very serious     | not assessable | not serious    | very serious <sup>a,d</sup> | none                 | 3/47 (6.4%)                   | 12/44 (27.3%) | RR 0.23<br>(0.07 to 0.77)                                                                                                                            | 210 fewer per 1,000<br>(from 254 fewer to 63 fewer) | ⊕○○○<br>Very low | CRITICAL   |
| <b>Laxity - KT1000 15lb - subjects who displayed abnormal laxity &gt;5mm difference between limbs – 6 months post-op</b>       |                  |                  |                |                |                             |                      |                               |               |                                                                                                                                                      |                                                     |                  |            |
| Shaw 2005                                                                                                                      | randomised trial | very serious     | not assessable | not serious    | very serious <sup>a,d</sup> | none                 | 0/47 (0.0%)                   | 2/44 (4.5%)   | RR 0.19<br>(0.01 to 3.80)                                                                                                                            | 37 fewer per 1,000<br>(from 45 fewer to 127 more)   | ⊕○○○<br>Very low | CRITICAL   |
| <b>Laxity - KT1000 20lb - subjects who displayed abnormal laxity &gt;3mm difference between limbs – 6 months post-op</b>       |                  |                  |                |                |                             |                      |                               |               |                                                                                                                                                      |                                                     |                  |            |
| Shaw 2005                                                                                                                      | randomised trial | very serious     | not assessable | not serious    | very serious <sup>a,d</sup> | none                 | 10/47 (21.3%)                 | 13/44 (29.5%) | RR 0.72<br>(0.35 to 1.47)                                                                                                                            | 83 fewer per 1,000<br>(from 192 fewer to 139 more)  | ⊕○○○<br>Very low | CRITICAL   |
| <b>Laxity - KT1000 20lb - subjects who displayed abnormal laxity &gt;5mm difference between limbs – 6 months post-op</b>       |                  |                  |                |                |                             |                      |                               |               |                                                                                                                                                      |                                                     |                  |            |
| Shaw 2005                                                                                                                      | randomised trial | very serious     | not assessable | not serious    | very serious <sup>a,d</sup> | none                 | 1/47 (2.1%)                   | 7/44 (15.9%)  | RR 0.13<br>(0.02 to 1.04)                                                                                                                            | 138 fewer per 1,000<br>(from 156 fewer to 6 more)   | ⊕○○○<br>Very low | CRITICAL   |
| <b>Laxity - KT1000 max manual - subjects who displayed abnormal laxity &gt;3mm difference between limbs – 6 months post-op</b> |                  |                  |                |                |                             |                      |                               |               |                                                                                                                                                      |                                                     |                  |            |
| Shaw 2005                                                                                                                      | randomised trial | very serious     | not assessable | not serious    | very serious <sup>a,d</sup> | none                 | 17/47 (36.2%)                 | 16/44 (36.4%) | RR 0.99<br>(0.58 to 1.72)                                                                                                                            | 4 fewer per 1,000<br>(from 153 fewer to 262 more)   | ⊕○○○<br>Very low | CRITICAL   |
| <b>Laxity - KT1000 max manual - subjects who displayed abnormal laxity &gt;5mm difference between limbs – 6 months post-op</b> |                  |                  |                |                |                             |                      |                               |               |                                                                                                                                                      |                                                     |                  |            |
| Shaw 2005                                                                                                                      | randomised trial | very serious     | not assessable | not serious    | very serious <sup>a,d</sup> | none                 | 1/47 (2.1%)                   | 9/44 (20.5%)  | RR 0.10<br>(0.01 to 0.79)                                                                                                                            | 184 fewer per 1,000<br>(from 203 fewer to 43 fewer) | ⊕○○○<br>Very low | CRITICAL   |
| <b>ROM</b>                                                                                                                     |                  |                  |                |                |                             |                      |                               |               |                                                                                                                                                      |                                                     |                  |            |
| 1                                                                                                                              |                  |                  |                |                |                             |                      |                               |               |                                                                                                                                                      |                                                     |                  |            |
| <b>ROM - active knee flexion (better indicated by higher values) – 2 weeks post-op</b>                                         |                  |                  |                |                |                             |                      |                               |               |                                                                                                                                                      |                                                     |                  |            |

109

Aspetar clinical practice guideline on rehabilitation after ACLR: Supplementary file

| Certainty assessment                                                                      |                  |              |                |              |                      |                      | № of patients                 |            | Effect                                          |                   | Certainty        | Importance |
|-------------------------------------------------------------------------------------------|------------------|--------------|----------------|--------------|----------------------|----------------------|-------------------------------|------------|-------------------------------------------------|-------------------|------------------|------------|
| № of studies                                                                              | Study design     | Risk of bias | Inconsistency  | Indirectness | Imprecision          | Other considerations | Early isometric strengthening | Usual care | Relative (95% CI)                               | Absolute (95% CI) |                  |            |
| 1<br>Shaw 2005                                                                            | randomised trial | very serious | not assessable | not serious  | serious <sup>a</sup> | none                 | 55                            | 48         | SMD 0.2 higher<br>(0.19 lower to 0.59 higher)   |                   | ⊕○○○<br>Very low | CRITICAL   |
| <b>ROM - active knee flexion (better indicated by higher values) – 1 month post-op</b>    |                  |              |                |              |                      |                      |                               |            |                                                 |                   |                  |            |
| 1<br>Shaw 2005                                                                            | randomised trial | very serious | not assessable | not serious  | serious <sup>a</sup> | none                 | 55                            | 48         | SMD 0.43 higher<br>(0.04 higher to 0.82 higher) |                   | ⊕○○○<br>Very low | CRITICAL   |
| <b>ROM - active knee flexion (better indicated by higher values) – 3 months post-op</b>   |                  |              |                |              |                      |                      |                               |            |                                                 |                   |                  |            |
| 1<br>Shaw 2005                                                                            | randomised trial | very serious | not assessable | not serious  | serious <sup>a</sup> | none                 | 55                            | 48         | SMD 0.12 lower<br>(0.51 lower to 0.26 higher)   |                   | ⊕○○○<br>Very low | CRITICAL   |
| <b>ROM - active knee flexion (better indicated by higher values) – 6 months post-op</b>   |                  |              |                |              |                      |                      |                               |            |                                                 |                   |                  |            |
| 1<br>Shaw 2005                                                                            | randomised trial | very serious | not assessable | not serious  | serious <sup>a</sup> | none                 | 55                            | 48         | SMD 0.14 lower<br>(0.52 lower to 0.25 higher)   |                   | ⊕○○○<br>Very low | CRITICAL   |
| <b>ROM - active knee extension (better indicated by lower values) – 2 weeks post-op</b>   |                  |              |                |              |                      |                      |                               |            |                                                 |                   |                  |            |
| 1<br>Shaw 2005                                                                            | randomised trial | very serious | not assessable | not serious  | serious <sup>a</sup> | none                 | 55                            | 48         | SMD 0.44 higher<br>(0.05 higher to 0.83 higher) |                   | ⊕○○○<br>Very low | CRITICAL   |
| <b>ROM - passive knee extension (better indicated by lower values) – 2 weeks post-op</b>  |                  |              |                |              |                      |                      |                               |            |                                                 |                   |                  |            |
| 1<br>Shaw 2005                                                                            | randomised trial | very serious | not assessable | not serious  | serious <sup>a</sup> | none                 | 55                            | 48         | SMD 0<br>(0.39 lower to 0.39 higher)            |                   | ⊕○○○<br>Very low | CRITICAL   |
| <b>ROM - active knee extension (better indicated by lower values) – 1 month post-op</b>   |                  |              |                |              |                      |                      |                               |            |                                                 |                   |                  |            |
| 1<br>Shaw 2005                                                                            | randomised trial | very serious | not assessable | not serious  | serious <sup>a</sup> | none                 | 55                            | 48         | SMD 0.48 higher<br>(0.09 higher to 0.87 higher) |                   | ⊕○○○<br>Very low | CRITICAL   |
| <b>ROM - passive knee extension (better indicated by lower values) – 1 month post-op</b>  |                  |              |                |              |                      |                      |                               |            |                                                 |                   |                  |            |
| 1<br>Shaw 2005                                                                            | randomised trial | very serious | not assessable | not serious  | serious <sup>a</sup> | none                 | 55                            | 48         | SMD 0.26 higher<br>(0.13 lower to 0.65 higher)  |                   | ⊕○○○<br>Very low | CRITICAL   |
| <b>ROM - active knee extension (better indicated by lower values) – 3 months post-op</b>  |                  |              |                |              |                      |                      |                               |            |                                                 |                   |                  |            |
| 1<br>Shaw 2005                                                                            | randomised trial | very serious | not assessable | not serious  | serious <sup>a</sup> | none                 | 55                            | 48         | SMD 0.07 higher<br>(0.32 lower to 0.45 higher)  |                   | ⊕○○○<br>Very low | CRITICAL   |
| <b>ROM - passive knee extension (better indicated by lower values) – 3 months post-op</b> |                  |              |                |              |                      |                      |                               |            |                                                 |                   |                  |            |
| 1<br>Shaw 2005                                                                            | randomised trial | very serious | not assessable | not serious  | serious <sup>a</sup> | none                 | 55                            | 48         | SMD 0.12 lower<br>(0.5 lower to 0.27 higher)    |                   | ⊕○○○<br>Very low | CRITICAL   |
| <b>ROM - active knee extension (better indicated by lower values) – 6 months post-op</b>  |                  |              |                |              |                      |                      |                               |            |                                                 |                   |                  |            |
| 1<br>Shaw 2005                                                                            | randomised trial | very serious | not assessable | not serious  | serious <sup>a</sup> | none                 | 55                            | 48         | SMD 0.19 lower<br>(0.58 lower to 0.2 higher)    |                   | ⊕○○○<br>Very low | CRITICAL   |
| <b>ROM - passive knee extension (better indicated by lower values) – 6 months post-op</b> |                  |              |                |              |                      |                      |                               |            |                                                 |                   |                  |            |
| 1<br>Shaw 2005                                                                            | randomised trial | very serious | not assessable | not serious  | serious <sup>a</sup> | none                 | 55                            | 48         | SMD 0.24 lower<br>(0.63 lower to 0.15 higher)   |                   | ⊕○○○<br>Very low | CRITICAL   |
| <b>Patient reported outcomes (PROM)</b>                                                   |                  |              |                |              |                      |                      |                               |            |                                                 |                   |                  |            |
| 1                                                                                         |                  |              |                |              |                      |                      |                               |            |                                                 |                   |                  |            |
| <b>PROM - Cincinnati symptoms (better indicated by higher values) – 1 month post-op</b>   |                  |              |                |              |                      |                      |                               |            |                                                 |                   |                  |            |
| 1<br>Shaw 2005                                                                            | randomised trial | very serious | not assessable | not serious  | serious <sup>a</sup> | none                 | 55                            | 48         | SMD 0.1 higher<br>(0.29 lower to 0.49 higher)   |                   | ⊕○○○<br>Very low | CRITICAL   |
| <b>PROM - Cincinnati ADL (better indicated by higher values) – 1 month post-op</b>        |                  |              |                |              |                      |                      |                               |            |                                                 |                   |                  |            |
| 1<br>Shaw 2005                                                                            | randomised trial | very serious | not assessable | not serious  | serious <sup>a</sup> | none                 | 55                            | 48         | SMD 0.31 higher<br>(0.08 lower to 0.7 higher)   |                   | ⊕○○○<br>Very low | CRITICAL   |
| <b>PROM - Cincinnati symptoms (better indicated by higher values) – 3 months post-op</b>  |                  |              |                |              |                      |                      |                               |            |                                                 |                   |                  |            |
| 1<br>Shaw 2005                                                                            | randomised trial | very serious | not assessable | not serious  | serious <sup>a</sup> | none                 | 55                            | 48         | SMD 0.09 lower<br>(0.47 lower to 0.3 higher)    |                   | ⊕○○○<br>Very low | CRITICAL   |
| <b>PROM - Cincinnati ADL (better indicated by higher values) – 3 months post-op</b>       |                  |              |                |              |                      |                      |                               |            |                                                 |                   |                  |            |
| 1<br>Shaw 2005                                                                            | randomised trial | very serious | not assessable | not serious  | serious <sup>a</sup> | none                 | 55                            | 48         | SMD 0.22 higher<br>(0.17 lower to 0.61 higher)  |                   | ⊕○○○<br>Very low | CRITICAL   |

| Certainty assessment                                                                                   |                  |              |                |              |                      |                      | No of patients                |            | Effect                                         |                   | Certainty        | Importance |
|--------------------------------------------------------------------------------------------------------|------------------|--------------|----------------|--------------|----------------------|----------------------|-------------------------------|------------|------------------------------------------------|-------------------|------------------|------------|
| No of studies                                                                                          | Study design     | Risk of bias | Inconsistency  | Indirectness | Imprecision          | Other considerations | Early isometric strengthening | Usual care | Relative (95% CI)                              | Absolute (95% CI) |                  |            |
| <b>PROM - Cincinnati symptoms (better indicated by higher values) – 6 months post-op</b>               |                  |              |                |              |                      |                      |                               |            |                                                |                   |                  |            |
| 1<br>Shaw 2005                                                                                         | randomised trial | very serious | not assessable | not serious  | serious <sup>a</sup> | none                 | 55                            | 48         | SMD 0.6 higher<br>(0.21 higher to 1 higher)    |                   | ⊕○○○<br>Very low | CRITICAL   |
| <b>PROM - Cincinnati ADL (better indicated by higher values) – 6 months post-op</b>                    |                  |              |                |              |                      |                      |                               |            |                                                |                   |                  |            |
| 1<br>Shaw 2005                                                                                         | randomised trial | very serious | not assessable | not serious  | serious <sup>a</sup> | none                 | 55                            | 48         | SMD 0.29 higher<br>(0.1 lower to 0.68 higher)  |                   | ⊕○○○<br>Very low | CRITICAL   |
| <b>Pain</b>                                                                                            |                  |              |                |              |                      |                      |                               |            |                                                |                   |                  |            |
| 1                                                                                                      |                  |              |                |              |                      |                      |                               |            |                                                |                   |                  |            |
| <b>Pain - pain at rest (better indicated by lower values) – 2 weeks post-op</b>                        |                  |              |                |              |                      |                      |                               |            |                                                |                   |                  |            |
| 1<br>Shaw 2005                                                                                         | randomised trial | very serious | not assessable | not serious  | serious <sup>a</sup> | none                 | 55                            | 48         | SMD 0.17 higher<br>(0.22 lower to 0.55 higher) |                   | ⊕○○○<br>Very low | CRITICAL   |
| <b>Pain - pain with exercise (better indicated by lower values) – 2 weeks post-op</b>                  |                  |              |                |              |                      |                      |                               |            |                                                |                   |                  |            |
| 1<br>Shaw 2005                                                                                         | randomised trial | very serious | not assessable | not serious  | serious <sup>a</sup> | none                 | 55                            | 48         | SMD 0.35 higher<br>(0.04 lower to 0.74 higher) |                   | ⊕○○○<br>Very low | CRITICAL   |
| <b>Pain - pain at rest (better indicated by lower values) – 1 month post-op</b>                        |                  |              |                |              |                      |                      |                               |            |                                                |                   |                  |            |
| 1<br>Shaw 2005                                                                                         | randomised trial | very serious | not assessable | not serious  | serious <sup>a</sup> | none                 | 55                            | 48         | SMD 0<br>(0.39 lower to 0.39 higher)           |                   | ⊕○○○<br>Very low | CRITICAL   |
| <b>Pain - pain with exercise (better indicated by lower values) – 1 month post-op</b>                  |                  |              |                |              |                      |                      |                               |            |                                                |                   |                  |            |
| 1<br>Shaw 2005                                                                                         | randomised trial | very serious | not assessable | not serious  | serious <sup>a</sup> | none                 | 55                            | 48         | SMD 0.23 lower<br>(0.62 lower to 0.16 higher)  |                   | ⊕○○○<br>Very low | CRITICAL   |
| <b>Pain - pain at rest (better indicated by lower values) – 3 months post-op</b>                       |                  |              |                |              |                      |                      |                               |            |                                                |                   |                  |            |
| 1<br>Shaw 2005                                                                                         | randomised trial | very serious | not assessable | not serious  | serious <sup>a</sup> | none                 | 55                            | 48         | SMD 0.14 lower<br>(0.53 lower to 0.25 higher)  |                   | ⊕○○○<br>Very low | CRITICAL   |
| <b>Pain - pain with exercise (better indicated by lower values) – 3 months post-op</b>                 |                  |              |                |              |                      |                      |                               |            |                                                |                   |                  |            |
| 1<br>Shaw 2005                                                                                         | randomised trial | very serious | not assessable | not serious  | serious <sup>a</sup> | none                 | 55                            | 48         | SMD 0.15 higher<br>(0.24 lower to 0.53 higher) |                   | ⊕○○○<br>Very low | CRITICAL   |
| <b>Pain - pain at rest (better indicated by lower values) – 6 months post-op</b>                       |                  |              |                |              |                      |                      |                               |            |                                                |                   |                  |            |
| 1<br>Shaw 2005                                                                                         | randomised trial | very serious | not assessable | not serious  | serious <sup>a</sup> | none                 | 55                            | 48         | SMD 0<br>(0.39 lower to 0.39 higher)           |                   | ⊕○○○<br>Very low | CRITICAL   |
| <b>Pain - pain with exercise (better indicated by lower values) – 6 months post-op</b>                 |                  |              |                |              |                      |                      |                               |            |                                                |                   |                  |            |
| 1<br>Shaw 2005                                                                                         | randomised trial | very serious | not assessable | not serious  | serious <sup>a</sup> | none                 | 55                            | 48         | SMD 0.05 lower<br>(0.44 lower to 0.33 higher)  |                   | ⊕○○○<br>Very low | CRITICAL   |
| <b>Functional</b>                                                                                      |                  |              |                |              |                      |                      |                               |            |                                                |                   |                  |            |
| 1                                                                                                      |                  |              |                |              |                      |                      |                               |            |                                                |                   |                  |            |
| <b>Functional - single leg hop for distance (better indicated by higher values) – 6 months post-op</b> |                  |              |                |              |                      |                      |                               |            |                                                |                   |                  |            |
| 1<br>Shaw 2005                                                                                         | randomised trial | very serious | not assessable | not serious  | serious <sup>a</sup> | none                 | 55                            | 48         | SMD 0.18 higher<br>(0.2 lower to 0.57 higher)  |                   | ⊕○○○<br>Very low | IMPORTANT  |
| <b>Functional - triple hop for distance (better indicated by higher values) – 6 months post-op</b>     |                  |              |                |              |                      |                      |                               |            |                                                |                   |                  |            |
| 1<br>Shaw 2005                                                                                         | randomised trial | very serious | not assessable | not serious  | serious <sup>a</sup> | none                 | 55                            | 48         | SMD 0.15 higher<br>(0.24 lower to 0.54 higher) |                   | ⊕○○○<br>Very low | IMPORTANT  |
| <b>Adverse events</b>                                                                                  |                  |              |                |              |                      |                      |                               |            |                                                |                   |                  |            |
| Shaw 2005                                                                                              |                  |              |                |              |                      |                      |                               |            | None reported                                  |                   |                  | CRITICAL   |

CI: confidence interval; SMD: standardised mean difference; RR: risk ratio

- Total participants <800
- 95% CI of an SMD extends > 0.5 points in either direction
- Not reporting results or SDs
- 95% CI boundaries cross the arbitrary thresholds of 0.75 and 1.25

## Early leg press strengthening versus usual care in rehabilitation after ACLR

Bibliography: Kinikli 2014

| Certainty assessment                                                                                   |                  |              |                |              |                              |                      | No of patients              |            | Effect                                          |                   | Certainty        | Importance |
|--------------------------------------------------------------------------------------------------------|------------------|--------------|----------------|--------------|------------------------------|----------------------|-----------------------------|------------|-------------------------------------------------|-------------------|------------------|------------|
| No of studies                                                                                          | Study design     | Risk of bias | Inconsistency  | Indirectness | Imprecision                  | Other considerations | Early CON/ECC strengthening | Usual care | Relative (95% CI)                               | Absolute (95% CI) |                  |            |
| <b>Strength</b>                                                                                        |                  |              |                |              |                              |                      |                             |            |                                                 |                   |                  |            |
| 1                                                                                                      |                  |              |                |              |                              |                      |                             |            |                                                 |                   |                  |            |
| <b>Strength - Quadriceps CON 60°/s (better indicated by higher values) – 4 months post-op</b>          |                  |              |                |              |                              |                      |                             |            |                                                 |                   |                  |            |
| 1 Kinikli 2014                                                                                         | randomised trial | very serious | not assessable | not serious  | very serious <sup>a, b</sup> | none                 | 16                          | 17         | SMD 0.03 lower<br>(0.71 lower to 0.66 higher)   |                   | ⊕○○○<br>Very low | CRITICAL   |
| <b>Strength - Quadriceps CON 180°/s (better indicated by higher values) – 4 months post-op</b>         |                  |              |                |              |                              |                      |                             |            |                                                 |                   |                  |            |
| 1 Kinikli 2014                                                                                         | randomised trial | very serious | not assessable | not serious  | very serious <sup>a, b</sup> | none                 | 16                          | 17         | SMD 0.53 higher<br>(0.17 lower to 1.23 higher)  |                   | ⊕○○○<br>Very low | CRITICAL   |
| <b>Strength - Hamstring CON 60°/s (better indicated by higher values) – 4 months post-op</b>           |                  |              |                |              |                              |                      |                             |            |                                                 |                   |                  |            |
| 1 Kinikli 2014                                                                                         | randomised trial | very serious | not assessable | not serious  | very serious <sup>a, b</sup> | none                 | 16                          | 17         | SMD 0.45 higher<br>(0.24 lower to 1.14 higher)  |                   | ⊕○○○<br>Very low | CRITICAL   |
| <b>Strength - Hamstring CON 180°/s (better indicated by higher values) – 4 months post-op</b>          |                  |              |                |              |                              |                      |                             |            |                                                 |                   |                  |            |
| 1 Kinikli 2014                                                                                         | randomised trial | very serious | not assessable | not serious  | very serious <sup>a, b</sup> | none                 | 16                          | 17         | SMD 0.46 higher<br>(0.23 lower to 1.15 higher)  |                   | ⊕○○○<br>Very low | CRITICAL   |
| <b>Patient reported outcomes (PROM)</b>                                                                |                  |              |                |              |                              |                      |                             |            |                                                 |                   |                  |            |
| 1                                                                                                      |                  |              |                |              |                              |                      |                             |            |                                                 |                   |                  |            |
| <b>PROM - Lysholm scale (better indicated by higher values) – 4 months post-op</b>                     |                  |              |                |              |                              |                      |                             |            |                                                 |                   |                  |            |
| 1 Kinikli 2014                                                                                         | randomised trial | very serious | not assessable | not serious  | very serious <sup>a, b</sup> | none                 | 16                          | 17         | SMD 1.14 higher<br>(0.4 higher to 1.89 higher)  |                   | ⊕○○○<br>Very low | CRITICAL   |
| <b>PROM - ACL-QOL (better indicated by higher values) – 4 months post-op</b>                           |                  |              |                |              |                              |                      |                             |            |                                                 |                   |                  |            |
| 1 Kinikli 2014                                                                                         | randomised trial | very serious | not assessable | not serious  | very serious <sup>a, b</sup> | none                 | 16                          | 17         | SMD 1.61 higher<br>(0.81 higher to 2.41 higher) |                   | ⊕○○○<br>Very low | CRITICAL   |
| <b>Functional activities</b>                                                                           |                  |              |                |              |                              |                      |                             |            |                                                 |                   |                  |            |
| 1                                                                                                      |                  |              |                |              |                              |                      |                             |            |                                                 |                   |                  |            |
| <b>Functional - Single leg hop for distance (better indicated by higher values) – 4 months post-op</b> |                  |              |                |              |                              |                      |                             |            |                                                 |                   |                  |            |
| 1 Kinikli 2014                                                                                         | randomised trial | very serious | not assessable | not serious  | very serious <sup>a, b</sup> | none                 | 16                          | 17         | SMD 0.8 higher<br>(0.09 higher to 1.51 higher)  |                   | ⊕○○○<br>Very low | IMPORTANT  |
| <b>Functional - vertical hop (better indicated by higher values) – 4 months post-op</b>                |                  |              |                |              |                              |                      |                             |            |                                                 |                   |                  |            |
| 1 Kinikli 2014                                                                                         | randomised trial | very serious | not assessable | not serious  | very serious <sup>a, b</sup> | none                 | 16                          | 17         | SMD 0.9 higher<br>(0.18 higher to 1.62 higher)  |                   | ⊕○○○<br>Very low | IMPORTANT  |
| <b>Adverse events</b>                                                                                  |                  |              |                |              |                              |                      |                             |            |                                                 |                   |                  |            |
| Kinikli 2014                                                                                           |                  |              |                |              |                              |                      |                             |            | None reported                                   |                   |                  | CRITICAL   |

CI: confidence interval; SMD: standardised mean difference

a. Total participants &lt;800

b. 95% CI of an SMD extends &gt; 0.5 points in either direction

## Early hamstring isokinetic training versus late strengthening in rehabilitation after ACLR

Bibliography: Sekir 2010

| Certainty assessment                                                                           |                  |              |                |              |                              |                      | No of patients                |                              | Effect                                          |                   | Certainty        | Importance |
|------------------------------------------------------------------------------------------------|------------------|--------------|----------------|--------------|------------------------------|----------------------|-------------------------------|------------------------------|-------------------------------------------------|-------------------|------------------|------------|
| No of studies                                                                                  | Study design     | Risk of bias | Inconsistency  | Indirectness | Imprecision                  | Other considerations | Early H/S isokinetic training | Late H/S isokinetic training | Relative (95% CI)                               | Absolute (95% CI) |                  |            |
| <b>Strength</b>                                                                                |                  |              |                |              |                              |                      |                               |                              |                                                 |                   |                  |            |
| 1                                                                                              |                  |              |                |              |                              |                      |                               |                              |                                                 |                   |                  |            |
| <b>Strength - Quadriceps ISOM 60° (better indicated by higher values) – 1 month post-op</b>    |                  |              |                |              |                              |                      |                               |                              |                                                 |                   |                  |            |
| 1<br>Sekir 2010                                                                                | randomised trial | very serious | not assessable | not serious  | very serious <sup>a, b</sup> | none                 | 26                            | 22                           | SMD 0.2 lower<br>(0.77 lower to 0.37 higher)    |                   | ⊕○○○<br>Very low | CRITICAL   |
| <b>Strength - Quadriceps ISOM 60° (better indicated by higher values) – 2 months post-op</b>   |                  |              |                |              |                              |                      |                               |                              |                                                 |                   |                  |            |
| 1<br>Sekir 2010                                                                                | randomised trial | very serious | not assessable | not serious  | very serious <sup>a, b</sup> | none                 | 26                            | 22                           | SMD 0.06 lower<br>(0.63 lower to 0.51 higher)   |                   | ⊕○○○<br>Very low | CRITICAL   |
| <b>Strength - Quadriceps CON 60°/s (better indicated by higher values) – 2 months post-op</b>  |                  |              |                |              |                              |                      |                               |                              |                                                 |                   |                  |            |
| 1<br>Sekir 2010                                                                                | randomised trial | very serious | not assessable | not serious  | very serious <sup>a, b</sup> | none                 | 26                            | 22                           | SMD 0.19 lower<br>(0.76 lower to 0.38 higher)   |                   | ⊕○○○<br>Very low | CRITICAL   |
| <b>Strength - Quadriceps CON 180°/s (better indicated by higher values) – 2 months post-op</b> |                  |              |                |              |                              |                      |                               |                              |                                                 |                   |                  |            |
| 1<br>Sekir 2010                                                                                | randomised trial | very serious | not assessable | not serious  | very serious <sup>a, b</sup> | none                 | 26                            | 22                           | SMD 0.23 lower<br>(0.8 lower to 0.34 higher)    |                   | ⊕○○○<br>Very low | CRITICAL   |
| <b>Strength - Quadriceps CON 60°/s (better indicated by higher values) – 3 months post-op</b>  |                  |              |                |              |                              |                      |                               |                              |                                                 |                   |                  |            |
| 1<br>Sekir 2010                                                                                | randomised trial | very serious | not assessable | not serious  | very serious <sup>a, b</sup> | none                 | 26                            | 22                           | SMD 0.34 lower<br>(0.92 lower to 0.23 higher)   |                   | ⊕○○○<br>Very low | CRITICAL   |
| <b>Strength - Quadriceps CON 180°/s (better indicated by higher values) – 3 months post-op</b> |                  |              |                |              |                              |                      |                               |                              |                                                 |                   |                  |            |
| 1<br>Sekir 2010                                                                                | randomised trial | very serious | not assessable | not serious  | very serious <sup>a, b</sup> | none                 | 26                            | 22                           | SMD 0.34 lower<br>(0.91 lower to 0.23 higher)   |                   | ⊕○○○<br>Very low | CRITICAL   |
| <b>Strength - Quadriceps CON 60°/s (better indicated by higher values) – 4 months post-op</b>  |                  |              |                |              |                              |                      |                               |                              |                                                 |                   |                  |            |
| 1<br>Sekir 2010                                                                                | randomised trial | very serious | not assessable | not serious  | very serious <sup>a, b</sup> | none                 | 26                            | 22                           | SMD 0.45 lower<br>(1.02 lower to 0.13 higher)   |                   | ⊕○○○<br>Very low | CRITICAL   |
| <b>Strength - Quadriceps CON 180°/s (better indicated by higher values) – 4 months post-op</b> |                  |              |                |              |                              |                      |                               |                              |                                                 |                   |                  |            |
| 1<br>Sekir 2010                                                                                | randomised trial | very serious | not assessable | not serious  | very serious <sup>a, b</sup> | none                 | 26                            | 22                           | SMD 0.42 lower<br>(1 lower to 0.15 higher)      |                   | ⊕○○○<br>Very low | CRITICAL   |
| <b>Strength - Quadriceps CON 60°/s (better indicated by higher values) – 1 year post-op</b>    |                  |              |                |              |                              |                      |                               |                              |                                                 |                   |                  |            |
| 1<br>Sekir 2010                                                                                | randomised trial | very serious | not assessable | not serious  | very serious <sup>a, b</sup> | none                 | 12                            | 14                           | SMD 0.54 lower<br>(1.33 lower to 0.25 higher)   |                   | ⊕○○○<br>Very low | CRITICAL   |
| <b>Strength - Quadriceps CON 180°/s (better indicated by higher values) – 1 year post-op</b>   |                  |              |                |              |                              |                      |                               |                              |                                                 |                   |                  |            |
| 1<br>Sekir 2010                                                                                | randomised trial | very serious | not assessable | not serious  | very serious <sup>a, b</sup> | none                 | 12                            | 14                           | SMD 0.67 lower<br>(1.47 lower to 0.12 higher)   |                   | ⊕○○○<br>Very low | CRITICAL   |
| <b>Strength - Hamstring ISOM 30° (better indicated by higher values) – 1 month post-op</b>     |                  |              |                |              |                              |                      |                               |                              |                                                 |                   |                  |            |
| 1<br>Sekir 2010                                                                                | randomised trial | very serious | not assessable | not serious  | very serious <sup>a, b</sup> | none                 | 26                            | 22                           | SMD 0.6 higher<br>(0.02 higher to 1.19 higher)  |                   | ⊕○○○<br>Very low | CRITICAL   |
| <b>Strength - Hamstring ISOM 30° (better indicated by higher values) – 2 months post-op</b>    |                  |              |                |              |                              |                      |                               |                              |                                                 |                   |                  |            |
| 1<br>Sekir 2010                                                                                | randomised trial | very serious | not assessable | not serious  | very serious <sup>a, b</sup> | none                 | 26                            | 22                           | SMD 0.77 higher<br>(0.18 higher to 1.36 higher) |                   | ⊕○○○<br>Very low | CRITICAL   |
| <b>Strength - Hamstring CON 60°/s (better indicated by higher values) – 2 months post-op</b>   |                  |              |                |              |                              |                      |                               |                              |                                                 |                   |                  |            |
| 1<br>Sekir 2010                                                                                | randomised trial | very serious | not assessable | not serious  | very serious <sup>a, b</sup> | none                 | 26                            | 22                           | SMD 0.58 higher<br>(0 to 1.16 higher)           |                   | ⊕○○○<br>Very low | CRITICAL   |
| <b>Strength - Hamstring CON 180°/s (better indicated by higher values) – 2 months post-op</b>  |                  |              |                |              |                              |                      |                               |                              |                                                 |                   |                  |            |
| 1<br>Sekir 2010                                                                                | randomised trial | very serious | not assessable | not serious  | very serious <sup>a, b</sup> | none                 | 26                            | 22                           | SMD 0.16 higher<br>(0.41 lower to 0.72 higher)  |                   | ⊕○○○<br>Very low | CRITICAL   |
| <b>Strength - Hamstring CON 60°/s (better indicated by higher values) – 3 months post-op</b>   |                  |              |                |              |                              |                      |                               |                              |                                                 |                   |                  |            |

| Certainty assessment                                                                          |              |                  |               |                |             |                             | No of patients                |                              | Effect            |                                                 | Certainty        | Importance |
|-----------------------------------------------------------------------------------------------|--------------|------------------|---------------|----------------|-------------|-----------------------------|-------------------------------|------------------------------|-------------------|-------------------------------------------------|------------------|------------|
| No of studies                                                                                 | Study design | Risk of bias     | Inconsistency | Indirectness   | Imprecision | Other considerations        | Early H/S isokinetic training | Late H/S isokinetic training | Relative (95% CI) | Absolute (95% CI)                               |                  |            |
| 1                                                                                             | Sekir 2010   | randomised trial | very serious  | not assessable | not serious | very serious <sup>a,b</sup> | none                          | 26                           | 22                | SMD 0.66 higher<br>(0.08 higher to 1.25 higher) | ⊕○○○<br>Very low | CRITICAL   |
| <b>Strength - Hamstring CON 180°/s (better indicated by higher values) – 3 months post-op</b> |              |                  |               |                |             |                             |                               |                              |                   |                                                 |                  |            |
| 1                                                                                             | Sekir 2010   | randomised trial | very serious  | not assessable | not serious | very serious <sup>a,b</sup> | none                          | 26                           | 22                | SMD 0.45 higher<br>(0.13 lower to 1.02 higher)  | ⊕○○○<br>Very low | CRITICAL   |
| <b>Strength - Hamstring CON 60°/s (better indicated by higher values) – 4 months post-op</b>  |              |                  |               |                |             |                             |                               |                              |                   |                                                 |                  |            |
| 1                                                                                             | Sekir 2010   | randomised trial | very serious  | not assessable | not serious | very serious <sup>a,b</sup> | none                          | 26                           | 22                | SMD 0.55 higher<br>(0.03 lower to 1.13 higher)  | ⊕○○○<br>Very low | CRITICAL   |
| <b>Strength - Hamstring CON 180°/s (better indicated by higher values) – 4 months post-op</b> |              |                  |               |                |             |                             |                               |                              |                   |                                                 |                  |            |
| 1                                                                                             | Sekir 2010   | randomised trial | very serious  | not assessable | not serious | very serious <sup>a,b</sup> | none                          | 26                           | 22                | SMD 0.39 higher<br>(0.18 lower to 0.97 higher)  | ⊕○○○<br>Very low | CRITICAL   |
| <b>Strength - Hamstring CON 60°/s (better indicated by higher values) – 1 year post-op</b>    |              |                  |               |                |             |                             |                               |                              |                   |                                                 |                  |            |
| 1                                                                                             | Sekir 2010   | randomised trial | very serious  | not assessable | not serious | very serious <sup>a,b</sup> | none                          | 12                           | 14                | SMD 0.9 higher<br>(0.08 higher to 1.71 higher)  | ⊕○○○<br>Very low | CRITICAL   |
| <b>Strength - Hamstring CON 180°/s (better indicated by higher values) – 1 year post-op</b>   |              |                  |               |                |             |                             |                               |                              |                   |                                                 |                  |            |
| 1                                                                                             | Sekir 2010   | randomised trial | very serious  | not assessable | not serious | very serious <sup>a,b</sup> | none                          | 12                           | 14                | SMD 0.05 higher<br>(0.72 lower to 0.82 higher)  | ⊕○○○<br>Very low | CRITICAL   |
| <b>Patient reported outcomes (PROM)</b>                                                       |              |                  |               |                |             |                             |                               |                              |                   |                                                 |                  |            |
| 1                                                                                             |              |                  |               |                |             |                             |                               |                              |                   |                                                 |                  |            |
| <b>PROM - Cincinnati symptoms (better indicated by higher values) – 1 month post-op</b>       |              |                  |               |                |             |                             |                               |                              |                   |                                                 |                  |            |
| 1                                                                                             | Sekir 2010   | randomised trial | very serious  | not assessable | not serious | very serious <sup>a,b</sup> | none                          | 26                           | 22                | SMD 1.2 higher<br>(0.58 higher to 1.82 higher)  | ⊕○○○<br>Very low | CRITICAL   |
| <b>PROM - Cincinnati ADL (better indicated by higher values) – 1 month post-op</b>            |              |                  |               |                |             |                             |                               |                              |                   |                                                 |                  |            |
| 1                                                                                             | Sekir 2010   | randomised trial | very serious  | not assessable | not serious | very serious <sup>a,b</sup> | none                          | 26                           | 22                | SMD 1.19 higher<br>(0.57 higher to 1.81 higher) | ⊕○○○<br>Very low | CRITICAL   |
| <b>PROM - Cincinnati symptoms (better indicated by higher values) – 2 months post-op</b>      |              |                  |               |                |             |                             |                               |                              |                   |                                                 |                  |            |
| 1                                                                                             | Sekir 2010   | randomised trial | very serious  | not assessable | not serious | very serious <sup>a,b</sup> | none                          | 26                           | 22                | SMD 1.08 higher<br>(0.47 higher to 1.69 higher) | ⊕○○○<br>Very low | CRITICAL   |
| <b>PROM - Cincinnati ADL (better indicated by higher values) – 2 months post-op</b>           |              |                  |               |                |             |                             |                               |                              |                   |                                                 |                  |            |
| 1                                                                                             | Sekir 2010   | randomised trial | very serious  | not assessable | not serious | very serious <sup>a,b</sup> | none                          | 26                           | 22                | SMD 1.08 higher<br>(0.47 higher to 1.69 higher) | ⊕○○○<br>Very low | CRITICAL   |
| <b>PROM - Cincinnati symptoms (better indicated by higher values) – 3 months post-op</b>      |              |                  |               |                |             |                             |                               |                              |                   |                                                 |                  |            |
| 1                                                                                             | Sekir 2010   | randomised trial | very serious  | not assessable | not serious | very serious <sup>a,b</sup> | none                          | 26                           | 22                | SMD 1.14 higher<br>(0.52 higher to 1.75 higher) | ⊕○○○<br>Very low | CRITICAL   |
| <b>PROM - Cincinnati ADL (better indicated by higher values) – 3 months post-op</b>           |              |                  |               |                |             |                             |                               |                              |                   |                                                 |                  |            |
| 1                                                                                             | Sekir 2010   | randomised trial | very serious  | not assessable | not serious | very serious <sup>a,b</sup> | none                          | 26                           | 22                | SMD 1.22 higher<br>(0.59 higher to 1.84 higher) | ⊕○○○<br>Very low | CRITICAL   |
| <b>PROM - Cincinnati symptoms (better indicated by higher values) – 4 months post-op</b>      |              |                  |               |                |             |                             |                               |                              |                   |                                                 |                  |            |
| 1                                                                                             | Sekir 2010   | randomised trial | very serious  | not assessable | not serious | very serious <sup>a,b</sup> | none                          | 26                           | 22                | SMD 0.53 higher<br>(0.05 lower to 1.11 higher)  | ⊕○○○<br>Very low | CRITICAL   |
| <b>PROM - Cincinnati ADL (better indicated by higher values) – 4 months post-op</b>           |              |                  |               |                |             |                             |                               |                              |                   |                                                 |                  |            |
| 1                                                                                             | Sekir 2010   | randomised trial | very serious  | not assessable | not serious | very serious <sup>a,b</sup> | none                          | 26                           | 22                | SMD 1.54 higher<br>(0.88 higher to 2.19 higher) | ⊕○○○<br>Very low | CRITICAL   |
| <b>PROM - Cincinnati symptoms (better indicated by higher values) – 1 year post-op</b>        |              |                  |               |                |             |                             |                               |                              |                   |                                                 |                  |            |
| 1                                                                                             | Sekir 2010   | randomised trial | very serious  | not assessable | not serious | very serious <sup>a,b</sup> | none                          | 12                           | 14                | SMD 0.93 higher<br>(0.12 higher to 1.75 higher) | ⊕○○○<br>Very low | CRITICAL   |
| <b>PROM - Cincinnati ADL (better indicated by higher values) – 1 year post-op</b>             |              |                  |               |                |             |                             |                               |                              |                   |                                                 |                  |            |
| 1                                                                                             | Sekir 2010   | randomised trial | very serious  | not assessable | not serious | very serious <sup>a,b</sup> | none                          | 12                           | 14                | SMD 0.95 higher<br>(0.13 higher to 1.77 higher) | ⊕○○○<br>Very low | CRITICAL   |

| Certainty assessment                                                       |                  |              |                |              |                              |                      | No of patients                |                              | Effect                               |                   | Certainty | Importance |
|----------------------------------------------------------------------------|------------------|--------------|----------------|--------------|------------------------------|----------------------|-------------------------------|------------------------------|--------------------------------------|-------------------|-----------|------------|
| No of studies                                                              | Study design     | Risk of bias | Inconsistency  | Indirectness | Imprecision                  | Other considerations | Early H/S isokinetic training | Late H/S isokinetic training | Relative (95% CI)                    | Absolute (95% CI) |           |            |
| <b>PROM - Lysholm (better indicated by higher values) – 1 year post-op</b> |                  |              |                |              |                              |                      |                               |                              |                                      |                   |           |            |
| 1<br>Sekir 2010                                                            | randomised trial | very serious | not assessable | not serious  | very serious <sup>a, b</sup> | none                 | 20                            | 20                           | SMD 0<br>(0.62 lower to 0.62 higher) | ⊕○○○<br>Very low  | CRITICAL  |            |
| <b>Adverse events</b>                                                      |                  |              |                |              |                              |                      |                               |                              |                                      |                   |           |            |
| Sekir 2010                                                                 |                  |              |                |              |                              |                      |                               |                              | None reported                        |                   | CRITICAL  |            |

CI: confidence interval; SMD: standardised mean difference

- a. Total participants <800  
b. 95% CI of an SMD extends > 0.5 points in either direction

## Early eccentric training versus usual care in rehabilitation after ACLR

Bibliography: Gerber 2007a, Gerber 2007b, Gerber 2009

| Ne of studies                                                                                                | Study design     | Certainty assessment |                |              |                              |                      | Ne of patients           |            | Effect                                          |                   | Certainty | Importance |
|--------------------------------------------------------------------------------------------------------------|------------------|----------------------|----------------|--------------|------------------------------|----------------------|--------------------------|------------|-------------------------------------------------|-------------------|-----------|------------|
|                                                                                                              |                  | Risk of bias         | Inconsistency  | Indirectness | Imprecision                  | Other considerations | Early eccentric training | Usual care | Relative (95% CI)                               | Absolute (95% CI) |           |            |
| <b>Strength</b>                                                                                              |                  |                      |                |              |                              |                      |                          |            |                                                 |                   |           |            |
| 3                                                                                                            |                  |                      |                |              |                              |                      |                          |            |                                                 |                   |           |            |
| <b>Strength - Quadriceps CON 60°/s (better indicated by higher values) – 4 months post-op</b>                |                  |                      |                |              |                              |                      |                          |            |                                                 |                   |           |            |
| 1                                                                                                            | randomised trial | very serious         | not assessable | not serious  | very serious <sup>a, b</sup> | none                 | 20                       | 20         | SMD 0.74 higher<br>(0.1 higher to 1.38 higher)  | ⊕○○○<br>Very low  | CRITICAL  |            |
| <b>Strength - Quadriceps CON 60°/s (better indicated by higher values) – 6 months post-op</b>                |                  |                      |                |              |                              |                      |                          |            |                                                 |                   |           |            |
| 1                                                                                                            | randomised trial | very serious         | not assessable | not serious  | very serious <sup>a, b</sup> | none                 | 16                       | 16         | SMD 0.51 higher<br>(0.2 lower to 1.21 higher)   | ⊕○○○<br>Very low  | CRITICAL  |            |
| <b>Strength - Quadriceps CON 60°/s (better indicated by higher values) – 1 year post-op</b>                  |                  |                      |                |              |                              |                      |                          |            |                                                 |                   |           |            |
| 1                                                                                                            | randomised trial | very serious         | not assessable | not serious  | very serious <sup>a, b</sup> | none                 | 20                       | 20         | SMD 0.68 higher<br>(0.04 higher to 1.31 higher) | ⊕○○○<br>Very low  | CRITICAL  |            |
| <b>Strength - Hamstring CON 60°/s (better indicated by higher values) – 4 months post-op</b>                 |                  |                      |                |              |                              |                      |                          |            |                                                 |                   |           |            |
| 1                                                                                                            | randomised trial | very serious         | not assessable | not serious  | very serious <sup>a, b</sup> | none                 | 20                       | 20         | SMD 0.24 higher<br>(0.38 lower to 0.86 higher)  | ⊕○○○<br>Very low  | CRITICAL  |            |
| <b>Strength - Hamstring CON 60°/s (better indicated by higher values) – 1 year post-op</b>                   |                  |                      |                |              |                              |                      |                          |            |                                                 |                   |           |            |
| 1                                                                                                            | randomised trial | very serious         | not assessable | not serious  | very serious <sup>a, b</sup> | none                 | 20                       | 20         | SMD 0.52 higher<br>(0.11 lower to 1.15 higher)  | ⊕○○○<br>Very low  | CRITICAL  |            |
| <b>Atrophy</b>                                                                                               |                  |                      |                |              |                              |                      |                          |            |                                                 |                   |           |            |
| 2                                                                                                            |                  |                      |                |              |                              |                      |                          |            |                                                 |                   |           |            |
| <b>Atrophy - Quadriceps muscle volume change (better indicated by higher values) – 4 months post-op</b>      |                  |                      |                |              |                              |                      |                          |            |                                                 |                   |           |            |
| 1                                                                                                            | randomised trial | very serious         | not assessable | not serious  | very serious <sup>a, b</sup> | none                 | 20                       | 20         | SMD 1.25 higher<br>(0.56 higher to 1.93 higher) | ⊕○○○<br>Very low  | CRITICAL  |            |
| <b>Atrophy - Gluteus maximus muscle volume change (better indicated by higher values) – 4 months post-op</b> |                  |                      |                |              |                              |                      |                          |            |                                                 |                   |           |            |
| 1                                                                                                            | randomised trial | very serious         | not assessable | not serious  | very serious <sup>a, b</sup> | none                 | 20                       | 20         | SMD 1.35 higher<br>(0.66 higher to 2.04 higher) | ⊕○○○<br>Very low  | CRITICAL  |            |
| <b>Atrophy - Hamstring muscle volume change (better indicated by higher values) – 4 months post-op</b>       |                  |                      |                |              |                              |                      |                          |            |                                                 |                   |           |            |
| 1                                                                                                            | randomised trial | very serious         | not assessable | not serious  | very serious <sup>a, b</sup> | none                 | 20                       | 20         | SMD 0.14 lower<br>(0.76 lower to 0.48 higher)   | ⊕○○○<br>Very low  | CRITICAL  |            |
| <b>Atrophy - Gracilis muscle volume change (better indicated by higher values) – 4 months post-op</b>        |                  |                      |                |              |                              |                      |                          |            |                                                 |                   |           |            |
| 1                                                                                                            | randomised trial | very serious         | not assessable | not serious  | very serious <sup>a, b</sup> | none                 | 20                       | 20         | SMD 0.1 higher<br>(0.52 lower to 0.72 higher)   | ⊕○○○<br>Very low  | CRITICAL  |            |
| <b>Atrophy - Quadriceps muscle volume (better indicated by higher values) – 1 year post-op</b>               |                  |                      |                |              |                              |                      |                          |            |                                                 |                   |           |            |
| 1                                                                                                            | randomised trial | very serious         | not assessable | not serious  | very serious <sup>a, b</sup> | none                 | 20                       | 20         | SMD 0.49 higher<br>(0.14 lower to 1.12 higher)  | ⊕○○○<br>Very low  | CRITICAL  |            |
| <b>Atrophy - Quadriceps muscle volume change (better indicated by higher values) – 1 year post-op</b>        |                  |                      |                |              |                              |                      |                          |            |                                                 |                   |           |            |
| 1                                                                                                            | randomised trial | very serious         | not assessable | not serious  | very serious <sup>a, b</sup> | none                 | 20                       | 20         | SMD 0.79 higher<br>(0.14 higher to 1.43 higher) | ⊕○○○<br>Very low  | CRITICAL  |            |
| <b>Atrophy - Gluteus Maximus muscle volume (better indicated by higher values) – 1 year post-op</b>          |                  |                      |                |              |                              |                      |                          |            |                                                 |                   |           |            |
| 1                                                                                                            | randomised trial | very serious         | not assessable | not serious  | very serious <sup>a, b</sup> | none                 | 20                       | 20         | SMD 0.14 higher<br>(0.48 lower to 0.76 higher)  | ⊕○○○<br>Very low  | CRITICAL  |            |
| <b>Atrophy - Gluteus Maximus muscle volume change (better indicated by higher values) – 1 year post-op</b>   |                  |                      |                |              |                              |                      |                          |            |                                                 |                   |           |            |
| 1                                                                                                            | randomised trial | very serious         | not assessable | not serious  | very serious <sup>a, b</sup> | none                 | 20                       | 20         | SMD 0.75 higher<br>(0.11 higher to 1.4 higher)  | ⊕○○○<br>Very low  | CRITICAL  |            |
| <b>Atrophy - Hamstring muscle volume change (better indicated by higher values) – 1 year post-op</b>         |                  |                      |                |              |                              |                      |                          |            |                                                 |                   |           |            |
| 1                                                                                                            | randomised trial | very serious         | not assessable | not serious  | very serious <sup>a, b</sup> | none                 | 20                       | 20         | SMD 0.14 higher<br>(0.48 lower to 0.76 higher)  | ⊕○○○<br>Very low  | CRITICAL  |            |

116

Aspetar clinical practice guideline on rehabilitation after ACLR: Supplementary file

| No of studies                                                                                                             | Study design     | Risk of bias | Certainty assessment |              |                             |                      | No of patients           |            | Effect                                         |                   | Certainty | Importance |
|---------------------------------------------------------------------------------------------------------------------------|------------------|--------------|----------------------|--------------|-----------------------------|----------------------|--------------------------|------------|------------------------------------------------|-------------------|-----------|------------|
|                                                                                                                           |                  |              | Inconsistency        | Indirectness | Imprecision                 | Other considerations | Early eccentric training | Usual care | Relative (95% CI)                              | Absolute (95% CI) |           |            |
| <b>Atrophy - Gracilis muscle volume change (better indicated by higher values) – 1 year post-op</b>                       |                  |              |                      |              |                             |                      |                          |            |                                                |                   |           |            |
| 1<br>Gerber 2009                                                                                                          | randomised trial | very serious | not assessable       | not serious  | very serious <sup>a,b</sup> | none                 | 20                       | 20         | SMD 0.09 higher<br>(0.53 lower to 0.71 higher) | ⊕○○○<br>Very low  | CRITICAL  |            |
| <b>Patient reported outcomes (PROM)</b>                                                                                   |                  |              |                      |              |                             |                      |                          |            |                                                |                   |           |            |
| 3                                                                                                                         |                  |              |                      |              |                             |                      |                          |            |                                                |                   |           |            |
| <b>PROM - ADLS-KOOS (better indicated by higher values) – 4 months post-op</b>                                            |                  |              |                      |              |                             |                      |                          |            |                                                |                   |           |            |
| 1<br>Gerber 2007b                                                                                                         | randomised trial | very serious | not assessable       | not serious  | very serious <sup>a,b</sup> | none                 | 20                       | 20         | SMD 0.2 lower<br>(0.82 lower to 0.43 higher)   | ⊕○○○<br>Very low  | CRITICAL  |            |
| <b>PROM - Lysholm (better indicated by higher values) – 4 months post-op</b>                                              |                  |              |                      |              |                             |                      |                          |            |                                                |                   |           |            |
| 1<br>Gerber 2007b                                                                                                         | randomised trial | very serious | not assessable       | not serious  | very serious <sup>a,b</sup> | none                 | 20                       | 20         | SMD 0<br>(0.62 lower to 0.62 higher)           | ⊕○○○<br>Very low  | CRITICAL  |            |
| <b>PROM - ADLS-KOOS (better indicated by higher values) – 6 months post-op</b>                                            |                  |              |                      |              |                             |                      |                          |            |                                                |                   |           |            |
| 1<br>Gerber 2007a                                                                                                         | randomised trial | very serious | not assessable       | not serious  | very serious <sup>a,b</sup> | none                 | 16                       | 16         | SMD 0.18 higher<br>(0.52 lower to 0.87 higher) | ⊕○○○<br>Very low  | CRITICAL  |            |
| <b>PROM - ADLS-KOOS (better indicated by higher values) – 1 year post-op</b>                                              |                  |              |                      |              |                             |                      |                          |            |                                                |                   |           |            |
| 1<br>Gerber 2009                                                                                                          | randomised trial | very serious | not assessable       | not serious  | very serious <sup>a,b</sup> | none                 | 20                       | 20         | SMD 0<br>(0.62 lower to 0.62 higher)           | ⊕○○○<br>Very low  | CRITICAL  |            |
| <b>PROM - Lysholm scale (better indicated by higher values) – 1 year post-op</b>                                          |                  |              |                      |              |                             |                      |                          |            |                                                |                   |           |            |
| 1<br>Gerber 2009                                                                                                          | randomised trial | very serious | not assessable       | not serious  | very serious <sup>a,b</sup> | none                 | 20                       | 20         | SMD 0<br>(0.62 lower to 0.62 higher)           | ⊕○○○<br>Very low  | CRITICAL  |            |
| <b>Laxity</b>                                                                                                             |                  |              |                      |              |                             |                      |                          |            |                                                |                   |           |            |
| 3                                                                                                                         |                  |              |                      |              |                             |                      |                          |            |                                                |                   |           |            |
| <b>laxity - laxity difference between limbs measured by KT-1000 (better indicated by lower values) – 4 months post-op</b> |                  |              |                      |              |                             |                      |                          |            |                                                |                   |           |            |
| 1<br>Gerber 2007b                                                                                                         | randomised trial | very serious | not assessable       | not serious  | very serious <sup>a,b</sup> | none                 | 20                       | 20         | SMD 0.07 lower<br>(0.69 lower to 0.55 higher)  | ⊕○○○<br>Very low  | CRITICAL  |            |
| <b>laxity - laxity difference between limbs measured by KT-1000 (better indicated by lower values) – 6 months post-op</b> |                  |              |                      |              |                             |                      |                          |            |                                                |                   |           |            |
| 1<br>Gerber 2007a                                                                                                         | randomised trial | very serious | not assessable       | not serious  | very serious <sup>a,b</sup> | none                 | 16                       | 16         | SMD 0.07 lower<br>(0.76 lower to 0.62 higher)  | ⊕○○○<br>Very low  | CRITICAL  |            |
| <b>laxity - laxity difference between limbs measured by KT-1000 (better indicated by lower values) – 1 year post-op</b>   |                  |              |                      |              |                             |                      |                          |            |                                                |                   |           |            |
| 1<br>Gerber 2009                                                                                                          | randomised trial | very serious | not assessable       | not serious  | very serious <sup>a,b</sup> | none                 | 20                       | 20         | SMD 0.15 lower<br>(0.77 lower to 0.47 higher)  | ⊕○○○<br>Very low  | CRITICAL  |            |
| <b>Pain</b>                                                                                                               |                  |              |                      |              |                             |                      |                          |            |                                                |                   |           |            |
| 1                                                                                                                         |                  |              |                      |              |                             |                      |                          |            |                                                |                   |           |            |
| <b>Pain - knee pain (better indicated by lower values) – 4 months post-op</b>                                             |                  |              |                      |              |                             |                      |                          |            |                                                |                   |           |            |
| 1<br>Gerber 2007a                                                                                                         | randomised trial | very serious | not assessable       | not serious  | very serious <sup>a,b</sup> | none                 | 16                       | 16         | SMD 0.07 lower<br>(0.77 lower to 0.62 higher)  | ⊕○○○<br>Very low  | CRITICAL  |            |
| <b>Pain - thigh pain (better indicated by lower values) – 4 months post-op</b>                                            |                  |              |                      |              |                             |                      |                          |            |                                                |                   |           |            |
| 1<br>Gerber 2007a                                                                                                         | randomised trial | very serious | not assessable       | not serious  | very serious <sup>a,b</sup> | none                 | 16                       | 16         | SMD 0.03 higher<br>(0.66 lower to 0.72 higher) | ⊕○○○<br>Very low  | CRITICAL  |            |
| <b>Swelling</b>                                                                                                           |                  |              |                      |              |                             |                      |                          |            |                                                |                   |           |            |
| 1                                                                                                                         |                  |              |                      |              |                             |                      |                          |            |                                                |                   |           |            |
| <b>Swelling - Joint circumference difference mid patella (better indicated by lower values) – 4 months post-op</b>        |                  |              |                      |              |                             |                      |                          |            |                                                |                   |           |            |
| 1<br>Gerber 2007a                                                                                                         | randomised trial | very serious | not assessable       | not serious  | very serious <sup>a,b</sup> | none                 | 16                       | 16         | SMD 0.19 higher<br>(0.51 lower to 0.88 higher) | ⊕○○○<br>Very low  | CRITICAL  |            |
| <b>Swelling - Joint circumference difference mid patella (better indicated by lower values) – 6 months post-op</b>        |                  |              |                      |              |                             |                      |                          |            |                                                |                   |           |            |
| 1<br>Gerber 2007a                                                                                                         | randomised trial | very serious | not assessable       | not serious  | very serious <sup>a,b</sup> | none                 | 16                       | 16         | SMD 0.08 lower<br>(0.77 lower to 0.62 higher)  | ⊕○○○<br>Very low  | CRITICAL  |            |
| <b>Functional activities</b>                                                                                              |                  |              |                      |              |                             |                      |                          |            |                                                |                   |           |            |

| Certainty assessment                                                                                   |                  |              |                |              |                              |                      | No of patients           |            | Effect                                          |                   | Certainty | Importance |
|--------------------------------------------------------------------------------------------------------|------------------|--------------|----------------|--------------|------------------------------|----------------------|--------------------------|------------|-------------------------------------------------|-------------------|-----------|------------|
| No of studies                                                                                          | Study design     | Risk of bias | Inconsistency  | Indirectness | Imprecision                  | Other considerations | Early eccentric training | Usual care | Relative (95% CI)                               | Absolute (95% CI) |           |            |
| 3                                                                                                      |                  |              |                |              |                              |                      |                          |            |                                                 |                   |           |            |
| <b>Functional - single leg hop for distance (better indicated by higher values) – 4 months post-op</b> |                  |              |                |              |                              |                      |                          |            |                                                 |                   |           |            |
| 1<br>Gerber 2007b                                                                                      | randomised trial | very serious | not assessable | not serious  | very serious <sup>a, b</sup> | none                 | 20                       | 20         | SMD 0.53 higher<br>(0.1 lower to 1.17 higher)   | ⊕○○○<br>Very low  |           | IMPORTANT  |
| <b>Functional - single leg hop for distance (better indicated by higher values) – 6 months post-op</b> |                  |              |                |              |                              |                      |                          |            |                                                 |                   |           |            |
| 1<br>Gerber 2007a                                                                                      | randomised trial | very serious | not assessable | not serious  | very serious <sup>a, b</sup> | none                 | 16                       | 16         | SMD 0.43 higher<br>(0.27 lower to 1.14 higher)  | ⊕○○○<br>Very low  |           | IMPORTANT  |
| <b>Functional - single leg hop for distance (better indicated by higher values) – 1 year post-op</b>   |                  |              |                |              |                              |                      |                          |            |                                                 |                   |           |            |
| 1<br>Gerber 2009                                                                                       | randomised trial | very serious | not assessable | not serious  | very serious <sup>a, b</sup> | none                 | 20                       | 20         | SMD 0.72 higher<br>(0.08 higher to 1.36 higher) | ⊕○○○<br>Very low  |           | IMPORTANT  |
| <b>Adverse events</b>                                                                                  |                  |              |                |              |                              |                      |                          |            |                                                 |                   |           |            |
| Gerber 2007a                                                                                           |                  |              |                |              |                              |                      |                          |            | None reported                                   |                   |           | CRITICAL   |
| Gerber 2007b                                                                                           |                  |              |                |              |                              |                      |                          |            | None reported                                   |                   |           | CRITICAL   |
| Gerber 2009                                                                                            |                  |              |                |              |                              |                      |                          |            | None reported                                   |                   |           | CRITICAL   |

CI: confidence interval; SMD: standardised mean difference

- a. Total participants <800  
b. 95% CI of an SMD extends > 0.5 points in either direction

## Open Kinetic Chain versus Close Kinetic Chain in rehabilitation after ACLR

Bibliography: Bynum 1995, Morrissey 2000, Mikkelsen 2000, Hooper 2001, Morrissey 2002, Perry 2005, Kang 2012, Chrzan 2013, Ucar 2014

| No of studies                                                                                      | Study design      | Certainty assessment |                                     |              |                             |                      | No of patients     |                     | Effect                                                                                                     |                   | Certainty | Importance |
|----------------------------------------------------------------------------------------------------|-------------------|----------------------|-------------------------------------|--------------|-----------------------------|----------------------|--------------------|---------------------|------------------------------------------------------------------------------------------------------------|-------------------|-----------|------------|
|                                                                                                    |                   | Risk of bias         | Inconsistency                       | Indirectness | Imprecision                 | Other considerations | Open Kinetic Chain | Close Kinetic Chain | Relative (95% CI)                                                                                          | Absolute (95% CI) |           |            |
| <b>Strength</b>                                                                                    |                   |                      |                                     |              |                             |                      |                    |                     |                                                                                                            |                   |           |            |
| 3                                                                                                  |                   |                      |                                     |              |                             |                      |                    |                     |                                                                                                            |                   |           |            |
| <b>Strength - Quadriceps ISOM 60° (better indicated by higher values) – 6 weeks post-op</b>        |                   |                      |                                     |              |                             |                      |                    |                     |                                                                                                            |                   |           |            |
| 1<br>Morrissey 2002                                                                                | randomised trial  | serious              | not assessable                      | not serious  | very serious <sup>a,b</sup> | none                 | 22                 | 21                  | SMD 0.14 lower<br>(0.74 lower to 0.46 higher)                                                              | ⊕○○○<br>Very low  | CRITICAL  |            |
| <b>Strength - Quadriceps CON 30-60°/s (better indicated by higher values) – 6 months post-op</b>   |                   |                      |                                     |              |                             |                      |                    |                     |                                                                                                            |                   |           |            |
| 2<br>Mikkelsen 2000<br>Kang 2012                                                                   | randomised trials | very serious         | not serious<br>I <sup>2</sup> = 0%  | not serious  | serious <sup>a</sup>        | none                 | 40                 | 40                  | SMD 0.52 higher<br>(0.07 higher to 0.97 higher)                                                            | ⊕○○○<br>Very low  | CRITICAL  |            |
| <b>Strength - Quadriceps ECC 30°/s (better indicated by higher values) – 6 months post-op</b>      |                   |                      |                                     |              |                             |                      |                    |                     |                                                                                                            |                   |           |            |
| 1<br>Mikkelsen 2000                                                                                | randomised trial  | very serious         | not assessable                      | not serious  | very serious <sup>a,b</sup> | none                 | 22                 | 22                  | SMD 0.27 higher<br>(0.33 lower to 0.86 higher)                                                             | ⊕○○○<br>Very low  | CRITICAL  |            |
| <b>Strength - Quadriceps CON 120-180°/s (better indicated by higher values) – 6 months post-op</b> |                   |                      |                                     |              |                             |                      |                    |                     |                                                                                                            |                   |           |            |
| 2<br>Mikkelsen 2000<br>Kang 2012                                                                   | randomised trials | very serious         | not serious<br>I <sup>2</sup> = 14% | not serious  | serious <sup>a</sup>        | none                 | 40                 | 40                  | SMD 0.48 higher<br>(0.00 lower to 0.96 higher)                                                             | ⊕○○○<br>Very low  | CRITICAL  |            |
| <b>Strength - Quadriceps ECC 120°/s (better indicated by higher values) – 6 months post-op</b>     |                   |                      |                                     |              |                             |                      |                    |                     |                                                                                                            |                   |           |            |
| 1<br>Mikkelsen 2000                                                                                | randomised trial  | very serious         | not assessable                      | not serious  | very serious <sup>a,b</sup> | none                 | 22                 | 22                  | SMD 0.2 higher<br>(0.4 lower to 0.79 higher)                                                               | ⊕○○○<br>Very low  | CRITICAL  |            |
| <b>Strength - Quadriceps CON 240°/s (better indicated by higher values) – 6 months post-op</b>     |                   |                      |                                     |              |                             |                      |                    |                     |                                                                                                            |                   |           |            |
| 1<br>Mikkelsen 2000                                                                                | randomised trial  | very serious         | not assessable                      | not serious  | very serious <sup>a,b</sup> | none                 | 22                 | 22                  | SMD 0.12 higher<br>(0.47 lower to 0.71 higher)                                                             | ⊕○○○<br>Very low  | CRITICAL  |            |
| <b>Strength - Quadriceps ECC 240°/s (better indicated by higher values) – 6 months post-op</b>     |                   |                      |                                     |              |                             |                      |                    |                     |                                                                                                            |                   |           |            |
| 1<br>Mikkelsen 2000                                                                                | randomised trial  | very serious         | not assessable                      | not serious  | very serious <sup>a,b</sup> | none                 | 22                 | 22                  | SMD 0.15 higher<br>(0.44 lower to 0.74 higher)                                                             | ⊕○○○<br>Very low  | CRITICAL  |            |
| <b>Strength - Hamstring CON 60°/s (better indicated by higher values) – 6 months post-op</b>       |                   |                      |                                     |              |                             |                      |                    |                     |                                                                                                            |                   |           |            |
| 1<br>Kang 2012                                                                                     | randomised trial  | very serious         | not assessable                      | not serious  | very serious <sup>a,b</sup> | none                 | 18                 | 18                  | SMD 0.57 higher<br>(0.09 lower to 1.24 higher)                                                             | ⊕○○○<br>Very low  | CRITICAL  |            |
| Mikkelsen 2000                                                                                     | randomised trial  | very serious         | not assessable                      | not serious  | very serious <sup>a,c</sup> | none                 | 22                 | 22                  | SDs are not reported. The authors reported no statistically significant difference between the two groups. | ⊕○○○<br>Very low  | CRITICAL  |            |
| <b>Strength - Hamstring ECC 60°/s (better indicated by higher values) – 6 months post-op</b>       |                   |                      |                                     |              |                             |                      |                    |                     |                                                                                                            |                   |           |            |
| Mikkelsen 2000                                                                                     | randomised trial  | very serious         | not assessable                      | not serious  | very serious <sup>a,c</sup> | none                 | 22                 | 22                  | SDs are not reported. The authors reported no statistically significant difference between the two groups. | ⊕○○○<br>Very low  | CRITICAL  |            |
| <b>Strength - Hamstring CON 180°/s (better indicated by higher values) – 6 months post-op</b>      |                   |                      |                                     |              |                             |                      |                    |                     |                                                                                                            |                   |           |            |
| 1<br>Kang 2012                                                                                     | randomised trial  | very serious         | not assessable                      | not serious  | very serious <sup>a,b</sup> | none                 | 18                 | 18                  | SMD 0.66 higher<br>(0.01 lower to 1.33 higher)                                                             | ⊕○○○<br>Very low  | CRITICAL  |            |
| <b>Strength - 1RM squat leg press (better indicated by higher values) – 6 months post-op</b>       |                   |                      |                                     |              |                             |                      |                    |                     |                                                                                                            |                   |           |            |
| 1<br>Kang 2012                                                                                     | randomised trial  | very serious         | not assessable                      | not serious  | very serious <sup>a,b</sup> | none                 | 18                 | 18                  | SMD 0.42 higher<br>(0.24 lower to 1.08 higher)                                                             | ⊕○○○<br>Very low  | CRITICAL  |            |
| <b>Laxity</b>                                                                                      |                   |                      |                                     |              |                             |                      |                    |                     |                                                                                                            |                   |           |            |
| 4                                                                                                  |                   |                      |                                     |              |                             |                      |                    |                     |                                                                                                            |                   |           |            |
| <b>Laxity – 6 weeks post-op</b>                                                                    |                   |                      |                                     |              |                             |                      |                    |                     |                                                                                                            |                   |           |            |

| Certainty assessment                                                                                          |                  |              |                |              |                              |                      | No of patients     |                     | Effect                                                                                                     |                                                  | Certainty        | Importance |
|---------------------------------------------------------------------------------------------------------------|------------------|--------------|----------------|--------------|------------------------------|----------------------|--------------------|---------------------|------------------------------------------------------------------------------------------------------------|--------------------------------------------------|------------------|------------|
| No of studies                                                                                                 | Study design     | Risk of bias | Inconsistency  | Indirectness | Imprecision                  | Other considerations | Open Kinetic Chain | Close Kinetic Chain | Relative (95% CI)                                                                                          | Absolute (95% CI)                                |                  |            |
| Morrissey 2000                                                                                                | randomised trial | serious      | not assessable | not serious  | very serious <sup>a, c</sup> | none                 | 18                 | 18                  | SDs are not reported. The authors reported no statistically significant difference between the two groups. |                                                  | ⊕○○○<br>Very low | CRITICAL   |
| <b>Laxity - (better indicated by lower values) – 3 months post-op</b>                                         |                  |              |                |              |                              |                      |                    |                     |                                                                                                            |                                                  |                  |            |
| 1 Perry 2005                                                                                                  | randomised trial | serious      | not assessable | not serious  | very serious <sup>a, b</sup> | none                 | 23                 | 24                  | SMD 0<br>(0.57 lower to 0.57 higher)                                                                       |                                                  | ⊕○○○<br>Very low | CRITICAL   |
| <b>Laxity - (better indicated by lower values) – 6 months post-op</b>                                         |                  |              |                |              |                              |                      |                    |                     |                                                                                                            |                                                  |                  |            |
| 1 Mikkelsen 2000                                                                                              | randomised trial | very serious | not assessable | not serious  | very serious <sup>a, b</sup> | none                 | 22                 | 22                  | SMD 0.21 lower<br>(0.81 lower to 0.38 higher)                                                              |                                                  | ⊕○○○<br>Very low | CRITICAL   |
| <b>Laxity - laxity 90N – more than 1 year post-op</b>                                                         |                  |              |                |              |                              |                      |                    |                     |                                                                                                            |                                                  |                  |            |
| Bynum 1995                                                                                                    | randomised trial | very serious | not assessable | not serious  | very serious <sup>a, c</sup> | none                 | 32                 | 32                  | SDs are not reported. The authors reported no statistically significant difference between the two groups. |                                                  | ⊕○○○<br>Very low | CRITICAL   |
| <b>Laxity - laxity max – more than 1 year post-op</b>                                                         |                  |              |                |              |                              |                      |                    |                     |                                                                                                            |                                                  |                  |            |
| Bynum 1995                                                                                                    | randomised trial | very serious | not assessable | not serious  | very serious <sup>a, c</sup> | none                 | 32                 | 32                  | SDs are not reported. The authors reported no statistically significant difference between the two groups. |                                                  | ⊕○○○<br>Very low | CRITICAL   |
| <b>Pain</b>                                                                                                   |                  |              |                |              |                              |                      |                    |                     |                                                                                                            |                                                  |                  |            |
| 3                                                                                                             |                  |              |                |              |                              |                      |                    |                     |                                                                                                            |                                                  |                  |            |
| <b>Pain VAS scale (better indicated by lower values) – 6 weeks post-op</b>                                    |                  |              |                |              |                              |                      |                    |                     |                                                                                                            |                                                  |                  |            |
| 1 Morrissey 2002                                                                                              | randomised trial | serious      | not assessable | not serious  | very serious <sup>a, b</sup> | none                 | 22                 | 21                  | SMD 0.18 lower<br>(0.78 lower to 0.41 higher)                                                              |                                                  | ⊕○○○<br>Very low | CRITICAL   |
| <b>Pain VAS scale (better indicated by lower values) – 3 months post-op</b>                                   |                  |              |                |              |                              |                      |                    |                     |                                                                                                            |                                                  |                  |            |
| 1 Ucar 2014                                                                                                   | randomised trial | very serious | not assessable | not serious  | very serious <sup>a, b</sup> | none                 | 30                 | 30                  | SMD 0.58 higher<br>(0.07 higher to 1.1 higher)                                                             |                                                  | ⊕○○○<br>Very low | CRITICAL   |
| <b>Pain VAS scale (better indicated by lower values) – 6 months post-op</b>                                   |                  |              |                |              |                              |                      |                    |                     |                                                                                                            |                                                  |                  |            |
| 1 Ucar 2014                                                                                                   | randomised trial | very serious | not assessable | not serious  | very serious <sup>a, b</sup> | none                 | 28                 | 28                  | SMD 0.49 higher<br>(0.04 lower to 1.03 higher)                                                             |                                                  | ⊕○○○<br>Very low | CRITICAL   |
| <b>Patellofemoral pain – number of patients with patellofemoral pain – more than 1 year post-op</b>           |                  |              |                |              |                              |                      |                    |                     |                                                                                                            |                                                  |                  |            |
| 1 Bynum 1995                                                                                                  | randomised trial | very serious | not assessable | not serious  | very serious <sup>a, d</sup> | none                 | 10/41 (24.4%)      | 8/44 (18.2%)        | RR 1.34<br>(0.59 to 3.07)                                                                                  | 62 more per 1,000<br>(from 75 fewer to 376 more) | ⊕○○○<br>Very low | CRITICAL   |
| <b>Patient reported outcomes (PROM)</b>                                                                       |                  |              |                |              |                              |                      |                    |                     |                                                                                                            |                                                  |                  |            |
| 6                                                                                                             |                  |              |                |              |                              |                      |                    |                     |                                                                                                            |                                                  |                  |            |
| <b>PROM - Hughston Clinic Questionnaire (better indicated by higher values) – 6 weeks post-op</b>             |                  |              |                |              |                              |                      |                    |                     |                                                                                                            |                                                  |                  |            |
| 1 Hooper 2001                                                                                                 | randomised trial | serious      | not assessable | not serious  | very serious <sup>a, b</sup> | none                 | 18                 | 18                  | SMD 0<br>(0.65 lower to 0.65 higher)                                                                       |                                                  | ⊕○○○<br>Very low | CRITICAL   |
| <b>PROM - Hughston Clinic Questionnaire Question 1 (better indicated by higher values) – 6 weeks post-op</b>  |                  |              |                |              |                              |                      |                    |                     |                                                                                                            |                                                  |                  |            |
| 1 Morrissey 2002                                                                                              | randomised trial | serious      | not assessable | not serious  | very serious <sup>a, b</sup> | none                 | 22                 | 21                  | SMD 0.31 lower<br>(0.91 lower to 0.29 higher)                                                              |                                                  | ⊕○○○<br>Very low | CRITICAL   |
| <b>PROM - Hughston Clinic Questionnaire Question 2 (better indicated by higher values) – 6 weeks post-op</b>  |                  |              |                |              |                              |                      |                    |                     |                                                                                                            |                                                  |                  |            |
| 1 Morrissey 2002                                                                                              | randomised trial | serious      | not assessable | not serious  | very serious <sup>a, b</sup> | none                 | 22                 | 21                  | SMD 0.47 lower<br>(1.08 lower to 0.14 higher)                                                              |                                                  | ⊕○○○<br>Very low | CRITICAL   |
| <b>PROM - Hughston Clinic Questionnaire Question 25 (better indicated by higher values) – 6 weeks post-op</b> |                  |              |                |              |                              |                      |                    |                     |                                                                                                            |                                                  |                  |            |
| 1 Morrissey 2002                                                                                              | randomised trial | serious      | not assessable | not serious  | very serious <sup>a, b</sup> | none                 | 22                 | 21                  | SMD 0.16 lower<br>(0.76 lower to 0.44 higher)                                                              |                                                  | ⊕○○○<br>Very low | CRITICAL   |
| <b>PROM - IKDC (better indicated by higher values) – 2 months post-op</b>                                     |                  |              |                |              |                              |                      |                    |                     |                                                                                                            |                                                  |                  |            |

| Certainty assessment                                                                                  |                   |              |                               |              |                              |                      | No of patients     |                     | Effect                                                                                                     |                                                   | Certainty        | Importance |
|-------------------------------------------------------------------------------------------------------|-------------------|--------------|-------------------------------|--------------|------------------------------|----------------------|--------------------|---------------------|------------------------------------------------------------------------------------------------------------|---------------------------------------------------|------------------|------------|
| No of studies                                                                                         | Study design      | Risk of bias | Inconsistency                 | Indirectness | Imprecision                  | Other considerations | Open Kinetic Chain | Close Kinetic Chain | Relative (95% CI)                                                                                          | Absolute (95% CI)                                 |                  |            |
| 1<br>Chrzan 2013                                                                                      | randomised trial  | very serious | not assessable                | not serious  | very serious <sup>a, b</sup> | none                 | 20                 | 20                  | SMD 1.5 higher<br>(0.79 higher to 2.21 higher)                                                             |                                                   | ⊕○○○<br>Very low | CRITICAL   |
| <b>PROM - Lysholm (better indicated by higher values) – 2-3 months post-op</b>                        |                   |              |                               |              |                              |                      |                    |                     |                                                                                                            |                                                   |                  |            |
| 2<br>Chrzan 2013<br>Ucar 2014                                                                         | randomised trials | very serious | serious<br>I <sup>2</sup> =0% | not serious  | very serious <sup>a, b</sup> | none                 | 50                 | 50                  | SMD 0.24 higher<br>(0.54 lower to 1.02 higher)                                                             |                                                   | ⊕○○○<br>Very low | CRITICAL   |
| <b>PROM - Hughston Clinic Questionnaire (better indicated by higher values) – 3 months post-op</b>    |                   |              |                               |              |                              |                      |                    |                     |                                                                                                            |                                                   |                  |            |
| 1<br>Perry 2005                                                                                       | randomised trial  | serious      | not assessable                | not serious  | very serious <sup>a, b</sup> | none                 | 24                 | 25                  | SMD 0.23 lower<br>(0.79 lower to 0.33 higher)                                                              |                                                   | ⊕○○○<br>Very low | CRITICAL   |
| <b>PROM - Lysholm (better indicated by higher values) – 6 months post-op</b>                          |                   |              |                               |              |                              |                      |                    |                     |                                                                                                            |                                                   |                  |            |
| 1<br>Ucar 2014                                                                                        | randomised trial  | very serious | not assessable                | not serious  | very serious <sup>a, b</sup> | none                 | 28                 | 28                  | SMD 1.1 lower<br>(1.66 lower to 0.53 lower)                                                                |                                                   | ⊕○○○<br>Very low | CRITICAL   |
| <b>PROM - Lysholm scale – more than 1 year post-op</b>                                                |                   |              |                               |              |                              |                      |                    |                     |                                                                                                            |                                                   |                  |            |
| Bynum 1995                                                                                            | randomised trial  | very serious | not assessable                | not serious  | very serious <sup>a, c</sup> | none                 | 41                 | 44                  | SDs are not reported. The authors reported no statistically significant difference between the two groups. |                                                   | ⊕○○○<br>Very low | CRITICAL   |
| <b>PROM - Tegner – more than 1 year post-op</b>                                                       |                   |              |                               |              |                              |                      |                    |                     |                                                                                                            |                                                   |                  |            |
| Bynum 1995                                                                                            | randomised trial  | very serious | not assessable                | not serious  | very serious <sup>a, c</sup> | none                 | 41                 | 44                  | SDs are not reported. The authors reported no statistically significant difference between the two groups. |                                                   | ⊕○○○<br>Very low | CRITICAL   |
| <b>PROM - Overall patient assessment rating – more than 1 year post-op</b>                            |                   |              |                               |              |                              |                      |                    |                     |                                                                                                            |                                                   |                  |            |
| Bynum 1995                                                                                            | randomised trial  | very serious | not assessable                | not serious  | very serious <sup>a, c</sup> | none                 | 41                 | 44                  | SDs are not reported. The authors reported no statistically significant difference between the two groups. |                                                   | ⊕○○○<br>Very low | CRITICAL   |
| <b>Atrophy</b>                                                                                        |                   |              |                               |              |                              |                      |                    |                     |                                                                                                            |                                                   |                  |            |
| 1                                                                                                     |                   |              |                               |              |                              |                      |                    |                     |                                                                                                            |                                                   |                  |            |
| <b>Atrophy - thigh circumference difference (better indicated by lower values) – 3 months post-op</b> |                   |              |                               |              |                              |                      |                    |                     |                                                                                                            |                                                   |                  |            |
| 1<br>Ucar 2014                                                                                        | randomised trial  | very serious | not assessable                | not serious  | very serious <sup>a, b</sup> | none                 | 30                 | 30                  | SMD 0.45 higher<br>(0.06 lower to 0.97 higher)                                                             |                                                   | ⊕○○○<br>Very low | CRITICAL   |
| <b>Atrophy - thigh circumference difference (better indicated by lower values) – 6 months post-op</b> |                   |              |                               |              |                              |                      |                    |                     |                                                                                                            |                                                   |                  |            |
| 1<br>Ucar 2014                                                                                        | randomised trial  | very serious | not assessable                | not serious  | very serious <sup>a, b</sup> | none                 | 28                 | 28                  | SMD 0.2 higher<br>(0.32 lower to 0.73 higher)                                                              |                                                   | ⊕○○○<br>Very low | CRITICAL   |
| <b>Range of motion (ROM)</b>                                                                          |                   |              |                               |              |                              |                      |                    |                     |                                                                                                            |                                                   |                  |            |
| 2                                                                                                     |                   |              |                               |              |                              |                      |                    |                     |                                                                                                            |                                                   |                  |            |
| <b>ROM - knee flexion (better indicated by higher values) – 3 months post-op</b>                      |                   |              |                               |              |                              |                      |                    |                     |                                                                                                            |                                                   |                  |            |
| 1<br>Ucar 2014                                                                                        | randomised trial  | very serious | not assessable                | not serious  | very serious <sup>a, b</sup> | none                 | 30                 | 30                  | SMD 0.57 lower<br>(1.08 lower to 0.05 lower)                                                               |                                                   | ⊕○○○<br>Very low | IMPORTANT  |
| <b>ROM - knee flexion (better indicated by higher values) – 6 months post-op</b>                      |                   |              |                               |              |                              |                      |                    |                     |                                                                                                            |                                                   |                  |            |
| 1<br>Ucar 2014                                                                                        | randomised trial  | very serious | not assessable                | not serious  | very serious <sup>a, b</sup> | none                 | 28                 | 28                  | SMD 0.38 lower<br>(0.91 lower to 0.15 higher)                                                              |                                                   | ⊕○○○<br>Very low | IMPORTANT  |
| <b>ROM – patients with extension deficit &gt;5deg – 1 year post-op</b>                                |                   |              |                               |              |                              |                      |                    |                     |                                                                                                            |                                                   |                  |            |
| 1<br>Bynum 1995                                                                                       | randomised trial  | very serious | not assessable                | not serious  | very serious <sup>a, d</sup> | none                 | 1/32 (3.1%)        | 2/32 (6.3%)         | RR 0.50<br>(0.05 to 5.24)                                                                                  | 31 fewer per 1,000<br>(from 59 fewer to 265 more) | ⊕○○○<br>Very low | IMPORTANT  |
| <b>ROM - patients with flexion deficit &gt;10deg – 1 year post-op</b>                                 |                   |              |                               |              |                              |                      |                    |                     |                                                                                                            |                                                   |                  |            |
| 1<br>Bynum 1995                                                                                       | randomised trial  | very serious | not assessable                | not serious  | very serious <sup>a, d</sup> | none                 | 0/32 (0.0%)        | 2/32 (6.3%)         | RR 0.20<br>(0.01 to 4.01)                                                                                  | 50 fewer per 1,000<br>(from 62 fewer to 188 more) | ⊕○○○<br>Very low | IMPORTANT  |
| <b>Functional activities</b>                                                                          |                   |              |                               |              |                              |                      |                    |                     |                                                                                                            |                                                   |                  |            |

| Certainty assessment                                                                                                 |                  |              |                |              |                              |                      | No of patients     |                     | Effect                                                                                                                                                  |                                                   | Certainty        | Importance |
|----------------------------------------------------------------------------------------------------------------------|------------------|--------------|----------------|--------------|------------------------------|----------------------|--------------------|---------------------|---------------------------------------------------------------------------------------------------------------------------------------------------------|---------------------------------------------------|------------------|------------|
| No of studies                                                                                                        | Study design     | Risk of bias | Inconsistency  | Indirectness | Imprecision                  | Other considerations | Open Kinetic Chain | Close Kinetic Chain | Relative (95% CI)                                                                                                                                       | Absolute (95% CI)                                 |                  |            |
| 2                                                                                                                    |                  |              |                |              |                              |                      |                    |                     |                                                                                                                                                         |                                                   |                  |            |
| <b>Functional - knee flexion at heel-strike during walking (better indicated by higher values) – 6 weeks post-op</b> |                  |              |                |              |                              |                      |                    |                     |                                                                                                                                                         |                                                   |                  |            |
| 1 Hooper 2001                                                                                                        | randomised trial | serious      | not assessable | not serious  | very serious <sup>a, b</sup> | none                 | 17                 | 18                  | SMD 0.31 higher<br>(0.36 lower to 0.97 higher)                                                                                                          |                                                   | ⊕○○○<br>Very low | IMPORTANT  |
| <b>Functional - Midstance excursion angle during walking (better indicated by higher values) – 6 weeks post-op</b>   |                  |              |                |              |                              |                      |                    |                     |                                                                                                                                                         |                                                   |                  |            |
| 1 Hooper 2001                                                                                                        | randomised trial | serious      | not assessable | not serious  | very serious <sup>a, b</sup> | none                 | 17                 | 18                  | SMD 0.49 lower<br>(1.16 lower to 0.19 higher)                                                                                                           |                                                   | ⊕○○○<br>Very low | IMPORTANT  |
| <b>Functional - Knee flexion at toe-off during walking (better indicated by higher values) – 6 weeks post-op</b>     |                  |              |                |              |                              |                      |                    |                     |                                                                                                                                                         |                                                   |                  |            |
| 1 Hooper 2001                                                                                                        | randomised trial | serious      | not assessable | not serious  | very serious <sup>a, b</sup> | none                 | 17                 | 18                  | SMD 0.24 higher<br>(0.42 lower to 0.91 higher)                                                                                                          |                                                   | ⊕○○○<br>Very low | IMPORTANT  |
| <b>Functional - Flexor impulse during walking (better indicated by higher values) – 6 weeks post-op</b>              |                  |              |                |              |                              |                      |                    |                     |                                                                                                                                                         |                                                   |                  |            |
| Hooper 2001                                                                                                          | randomised trial | serious      | not assessable | not serious  | very serious <sup>a, b</sup> | none                 | 17                 | 18                  | SMD 0.54 higher<br>(0.14 lower to 1.21 higher)                                                                                                          |                                                   | ⊕○○○<br>Very low | IMPORTANT  |
| <b>Functional - Extensor impulse during walking (better indicated by higher values) – 6 weeks post-op</b>            |                  |              |                |              |                              |                      |                    |                     |                                                                                                                                                         |                                                   |                  |            |
| 1 Hooper 2001                                                                                                        | randomised trial | serious      | not assessable | not serious  | very serious <sup>a, b</sup> | none                 | 17                 | 18                  | SMD 0.29 lower<br>(0.96 lower to 0.38 higher)                                                                                                           |                                                   | ⊕○○○<br>Very low | IMPORTANT  |
| <b>Functional - Eccentric energy during walking (better indicated by higher values) – 6 weeks post-op</b>            |                  |              |                |              |                              |                      |                    |                     |                                                                                                                                                         |                                                   |                  |            |
| 1 Hooper 2001                                                                                                        | randomised trial | serious      | not assessable | not serious  | very serious <sup>a, b</sup> | none                 | 17                 | 18                  | SMD 0.55 lower<br>(1.23 lower to 0.13 higher)                                                                                                           |                                                   | ⊕○○○<br>Very low | IMPORTANT  |
| <b>Functional - Concentric energy during walking (better indicated by higher values) – 6 weeks post-op</b>           |                  |              |                |              |                              |                      |                    |                     |                                                                                                                                                         |                                                   |                  |            |
| 1 Hooper 2001                                                                                                        | randomised trial | serious      | not assessable | not serious  | very serious <sup>a, b</sup> | none                 | 17                 | 18                  | SMD 0<br>(0.66 lower to 0.66 higher)                                                                                                                    |                                                   | ⊕○○○<br>Very low | IMPORTANT  |
| <b>Functional - single leg hop for distance (better indicated by higher values) – 3 months post-op</b>               |                  |              |                |              |                              |                      |                    |                     |                                                                                                                                                         |                                                   |                  |            |
| 1 Perry 2005                                                                                                         | randomised trial | very serious | not assessable | not serious  | very serious <sup>a, b</sup> | none                 | 14                 | 15                  | SMD 0.18 higher<br>(0.55 lower to 0.91 higher)                                                                                                          |                                                   | ⊕○○○<br>Very low | IMPORTANT  |
| <b>Functional - single leg vertical jump (better indicated by higher values) – 3 months post-op</b>                  |                  |              |                |              |                              |                      |                    |                     |                                                                                                                                                         |                                                   |                  |            |
| 1 Perry 2005                                                                                                         | randomised trial | very serious | not assessable | not serious  | very serious <sup>a, b</sup> | none                 | 15                 | 15                  | SMD 0.22 lower<br>(0.94 lower to 0.5 higher)                                                                                                            |                                                   | ⊕○○○<br>Very low | IMPORTANT  |
| <b>Functional - single leg crossover jump (better indicated by higher values) – 3 months post-op</b>                 |                  |              |                |              |                              |                      |                    |                     |                                                                                                                                                         |                                                   |                  |            |
| 1 Perry 2005                                                                                                         | randomised trial | very serious | not assessable | not serious  | very serious <sup>a, b</sup> | none                 | 9                  | 8                   | SMD 0.09 lower<br>(1.04 lower to 0.86 higher)                                                                                                           |                                                   | ⊕○○○<br>Very low | IMPORTANT  |
| <b>Functional – biomechanics during stair ascent and descent</b>                                                     |                  |              |                |              |                              |                      |                    |                     |                                                                                                                                                         |                                                   |                  |            |
| Hooper 2001                                                                                                          | randomised trial | serious      | not assessable | not serious  | very serious <sup>a, c</sup> | none                 | 17                 | 18                  | The authors reported no statistically significant difference between the two groups.                                                                    |                                                   | ⊕○○○<br>Very low | IMPORTANT  |
| <b>Time to return to sport (better indicated by lower values)</b>                                                    |                  |              |                |              |                              |                      |                    |                     |                                                                                                                                                         |                                                   |                  |            |
| 1 Mikkelsen 2000                                                                                                     | randomised trial | very serious | not assessable | not serious  | very serious <sup>a, b</sup> | none                 | 12                 | 5                   | SMD 1.07 lower<br>(2.19 lower to 0.05 higher)                                                                                                           |                                                   | ⊕○○○<br>Very low | CRITICAL   |
| <b>Number of patients that returned to sport at the same level</b>                                                   |                  |              |                |              |                              |                      |                    |                     |                                                                                                                                                         |                                                   |                  |            |
| 1 Mikkelsen 2000                                                                                                     | randomised trial | very serious | not assessable | not serious  | serious <sup>a</sup>         | none                 | 12/22 (54.5%)      | 5/22 (22.7%)        | RR 2.40<br>(1.02 to 5.67)                                                                                                                               | 318 more per 1,000<br>(from 5 more to 1,000 more) | ⊕○○○<br>Very low | CRITICAL   |
| <b>Adverse events</b>                                                                                                |                  |              |                |              |                              |                      |                    |                     |                                                                                                                                                         |                                                   |                  |            |
| Bynum 1995                                                                                                           |                  |              |                |              |                              |                      |                    |                     | 2 subjects in the OKC group had early graft failure, one occurred as a result of a fall several weeks after surgery, the cause of the other is unknown. |                                                   |                  | CRITICAL   |

| Certainty assessment |              |              |               |              |             |                      | No of patients     |                     | Effect            |                   | Certainty | Importance |
|----------------------|--------------|--------------|---------------|--------------|-------------|----------------------|--------------------|---------------------|-------------------|-------------------|-----------|------------|
| No of studies        | Study design | Risk of bias | Inconsistency | Indirectness | Imprecision | Other considerations | Open Kinetic Chain | Close Kinetic Chain | Relative (95% CI) | Absolute (95% CI) |           |            |
| Morrissey 2000       |              |              |               |              |             |                      |                    |                     | None reported     |                   |           | CRITICAL   |
| Mikkelsen 2000       |              |              |               |              |             |                      |                    |                     | None reported     |                   |           | CRITICAL   |
| Hooper 2001          |              |              |               |              |             |                      |                    |                     | None reported     |                   |           | CRITICAL   |
| Morrissey 2002       |              |              |               |              |             |                      |                    |                     | None reported     |                   |           | CRITICAL   |
| Perry 2005           |              |              |               |              |             |                      |                    |                     | None reported     |                   |           | CRITICAL   |
| Kang 2012            |              |              |               |              |             |                      |                    |                     | None reported     |                   |           | CRITICAL   |
| Chrzan 2013          |              |              |               |              |             |                      |                    |                     | None reported     |                   |           | CRITICAL   |
| Ucar 2014            |              |              |               |              |             |                      |                    |                     | None reported     |                   |           | CRITICAL   |

CI: confidence interval; SMD: standardised mean difference; RR: risk ratio

- Total participants <800
- 95% CI of an SMD extends > 0.5 points in either direction
- Not reporting results or SDs
- 95% CI boundaries cross the arbitrary thresholds of 0.75 and 1.25

## Eccentric training versus usual care in rehabilitation after ACLR

Bibliography: Friedmann-bette 2018, Milandri 2021, Kasmi 2021

| Certainty assessment                                                                                                                     |                   |              |                                   |              |                             |                      | No of patients     |            | Effect                                         |                   | Certainty        | Importance |
|------------------------------------------------------------------------------------------------------------------------------------------|-------------------|--------------|-----------------------------------|--------------|-----------------------------|----------------------|--------------------|------------|------------------------------------------------|-------------------|------------------|------------|
| No of studies                                                                                                                            | Study design      | Risk of bias | Inconsistency                     | Indirectness | Imprecision                 | Other considerations | Eccentric training | Usual care | Relative (95% CI)                              | Absolute (95% CI) |                  |            |
| <b>Strength</b>                                                                                                                          |                   |              |                                   |              |                             |                      |                    |            |                                                |                   |                  |            |
| 2                                                                                                                                        |                   |              |                                   |              |                             |                      |                    |            |                                                |                   |                  |            |
| <b>Strength - Quadriceps CON 60°/s (better indicated by higher values) – 5-6 months post-op</b>                                          |                   |              |                                   |              |                             |                      |                    |            |                                                |                   |                  |            |
| 2<br>Friedmann-bette 2018<br>Milandri 2021                                                                                               | randomised trials | very serious | not serious<br>I <sup>2</sup> =0% | not serious  | very serious <sup>a,b</sup> | none                 | 33                 | 26         | SMD 0.08 lower<br>(0.6 lower to 0.43 higher)   |                   | ⊕○○○<br>Very low | CRITICAL   |
| <b>Strength - Quadriceps CON 60°/s LSI% (better indicated by higher values) – 5-6 months post-op</b>                                     |                   |              |                                   |              |                             |                      |                    |            |                                                |                   |                  |            |
| 2<br>Friedmann-bette 2018<br>Milandri 2021                                                                                               | randomised trials | very serious | not serious<br>I <sup>2</sup> =0% | not serious  | very serious <sup>a,b</sup> | none                 | 33                 | 26         | SMD 0.22 lower<br>(0.74 lower to 0.29 higher)  |                   | ⊕○○○<br>Very low | CRITICAL   |
| <b>Strength - Quadriceps CON 180°/s (better indicated by higher values) – 5-6 months post-op</b>                                         |                   |              |                                   |              |                             |                      |                    |            |                                                |                   |                  |            |
| 2<br>Friedmann-bette 2018<br>Milandri 2021                                                                                               | randomised trials | very serious | not serious<br>I <sup>2</sup> =0% | not serious  | very serious <sup>a,b</sup> | none                 | 33                 | 26         | SMD 0.04 lower<br>(0.56 lower to 0.47 higher)  |                   | ⊕○○○<br>Very low | CRITICAL   |
| <b>Strength - Quadriceps CON 180°/s LSI% (better indicated by higher values) – 5-6 months post-op</b>                                    |                   |              |                                   |              |                             |                      |                    |            |                                                |                   |                  |            |
| 2<br>Friedmann-bette 2018<br>Milandri 2021                                                                                               | randomised trials | very serious | not serious<br>I <sup>2</sup> =0% | not serious  | very serious <sup>a,b</sup> | none                 | 33                 | 26         | SMD 0.13 lower<br>(0.65 lower to 0.38 higher)  |                   | ⊕○○○<br>Very low | CRITICAL   |
| <b>Strength - Quadriceps ECC 60°/s LSI% (better indicated by higher values) – 5 months post-op</b>                                       |                   |              |                                   |              |                             |                      |                    |            |                                                |                   |                  |            |
| 1<br>Milandri 2021                                                                                                                       | randomised trial  | not serious  | not assessable                    | not serious  | very serious <sup>a,b</sup> | none                 | 12                 | 10         | SMD 0.1 lower<br>(0.94 lower to 0.74 higher)   |                   | ⊕⊕○○<br>Low      | CRITICAL   |
| <b>Strength - Quadriceps ECC 120°/s LSI% (better indicated by higher values) – 5 months post-op</b>                                      |                   |              |                                   |              |                             |                      |                    |            |                                                |                   |                  |            |
| 1<br>Milandri 2021                                                                                                                       | randomised trial  | not serious  | not assessable                    | not serious  | very serious <sup>a,b</sup> | none                 | 12                 | 10         | SMD 0.21 lower<br>(1.06 lower to 0.63 higher)  |                   | ⊕⊕○○<br>Low      | CRITICAL   |
| <b>Strength - Hamstring CON 60°/s LSI% (better indicated by higher values) – 5 months post-op</b>                                        |                   |              |                                   |              |                             |                      |                    |            |                                                |                   |                  |            |
| 1<br>Milandri 2021                                                                                                                       | randomised trial  | not serious  | not assessable                    | not serious  | very serious <sup>a,b</sup> | none                 | 12                 | 10         | SMD 0.17 higher<br>(0.67 lower to 1.01 higher) |                   | ⊕⊕○○<br>Low      | CRITICAL   |
| <b>Strength - Hamstring CON 120°/s LSI% (better indicated by higher values) – 5 months post-op</b>                                       |                   |              |                                   |              |                             |                      |                    |            |                                                |                   |                  |            |
| 1<br>Milandri 2021                                                                                                                       | randomised trial  | not serious  | not assessable                    | not serious  | very serious <sup>a,b</sup> | none                 | 12                 | 10         | SMD 0.26 lower<br>(1.11 lower to 0.58 higher)  |                   | ⊕⊕○○<br>Low      | CRITICAL   |
| <b>Strength - Hamstring ECC 60°/s LSI% (better indicated by higher values) – 5 months post-op</b>                                        |                   |              |                                   |              |                             |                      |                    |            |                                                |                   |                  |            |
| 1<br>Milandri 2021                                                                                                                       | randomised trial  | not serious  | not assessable                    | not serious  | very serious <sup>a,b</sup> | none                 | 12                 | 10         | SMD 0.1 lower<br>(0.94 lower to 0.74 higher)   |                   | ⊕⊕○○<br>Low      | CRITICAL   |
| <b>Strength - Hamstring ECC 120°/s LSI% (better indicated by higher values) – 5 months post-op</b>                                       |                   |              |                                   |              |                             |                      |                    |            |                                                |                   |                  |            |
| 1<br>Milandri 2021                                                                                                                       | randomised trial  | not serious  | not assessable                    | not serious  | very serious <sup>a,b</sup> | none                 | 12                 | 10         | SMD 0.01 higher<br>(0.83 lower to 0.85 higher) |                   | ⊕⊕○○<br>Low      | CRITICAL   |
| <b>Atrophy</b>                                                                                                                           |                   |              |                                   |              |                             |                      |                    |            |                                                |                   |                  |            |
| 2                                                                                                                                        |                   |              |                                   |              |                             |                      |                    |            |                                                |                   |                  |            |
| <b>Atrophy - lean thigh volume LSI% (better indicated by higher values) – 5 months post-op</b>                                           |                   |              |                                   |              |                             |                      |                    |            |                                                |                   |                  |            |
| 1<br>Milandri 2021                                                                                                                       | randomised trial  | not serious  | not assessable                    | not serious  | very serious <sup>a,b</sup> | none                 | 12                 | 10         | SMD 0.53 lower<br>(1.39 lower to 0.33 higher)  |                   | ⊕⊕○○<br>Low      | CRITICAL   |
| <b>Atrophy - cross-sectional area of both quadriceps femoris muscles MRI LSI% (better indicated by higher values) – 6 months post-op</b> |                   |              |                                   |              |                             |                      |                    |            |                                                |                   |                  |            |

| Certainty assessment                                                                                                 |                  |              |                |              |                              |                      | No of patients     |            | Effect                                          |                   | Certainty        | Importance |
|----------------------------------------------------------------------------------------------------------------------|------------------|--------------|----------------|--------------|------------------------------|----------------------|--------------------|------------|-------------------------------------------------|-------------------|------------------|------------|
| No of studies                                                                                                        | Study design     | Risk of bias | Inconsistency  | Indirectness | Imprecision                  | Other considerations | Eccentric training | Usual care | Relative (95% CI)                               | Absolute (95% CI) |                  |            |
| 1<br>Friedmann-bette 2018                                                                                            | randomised trial | very serious | not assessable | not serious  | very serious <sup>a, b</sup> | none                 | 21                 | 16         | SMD 0.47 higher<br>(0.19 lower to 1.13 higher)  |                   | ⊕○○○<br>Very low | CRITICAL   |
| <b>Patient reported outcomes (PROM)</b>                                                                              |                  |              |                |              |                              |                      |                    |            |                                                 |                   |                  |            |
| 2                                                                                                                    |                  |              |                |              |                              |                      |                    |            |                                                 |                   |                  |            |
| <b>PROM - Lysholm (better indicated by higher values) – 4 months post-op</b>                                         |                  |              |                |              |                              |                      |                    |            |                                                 |                   |                  |            |
| 1<br>Kasmi 2021                                                                                                      | randomised trial | serious      | not assessable | not serious  | very serious <sup>a, b</sup> | none                 | 10                 | 10         | SMD 0.59 higher<br>(0.31 lower to 1.49 higher)  |                   | ⊕○○○<br>Very low | CRITICAL   |
| <b>PROM - ACL-RSI (better indicated by higher values) – 4 months post-op</b>                                         |                  |              |                |              |                              |                      |                    |            |                                                 |                   |                  |            |
| 1<br>Kasmi 2021                                                                                                      | randomised trial | serious      | not assessable | not serious  | very serious <sup>a, b</sup> | none                 | 10                 | 10         | SMD 1.23 higher<br>(0.26 higher to 2.21 higher) |                   | ⊕○○○<br>Very low | CRITICAL   |
| <b>PROM - IKDC (better indicated by higher values) – 5 months post-op</b>                                            |                  |              |                |              |                              |                      |                    |            |                                                 |                   |                  |            |
| 1<br>Milandri 2021                                                                                                   | randomised trial | serious      | not assessable | not serious  | very serious <sup>a, b</sup> | none                 | 12                 | 10         | SMD 0.14 lower<br>(0.98 lower to 0.7 higher)    |                   | ⊕○○○<br>Very low | CRITICAL   |
| <b>PROM - KOOS pain (better indicated by higher values) – 5 months post-op</b>                                       |                  |              |                |              |                              |                      |                    |            |                                                 |                   |                  |            |
| 1<br>Milandri 2021                                                                                                   | randomised trial | serious      | not assessable | not serious  | very serious <sup>a, b</sup> | none                 | 12                 | 10         | SMD 0.19 lower<br>(1.03 lower to 0.65 higher)   |                   | ⊕○○○<br>Very low | CRITICAL   |
| <b>PROM - KOOS symptoms (better indicated by higher values) – 5 months post-op</b>                                   |                  |              |                |              |                              |                      |                    |            |                                                 |                   |                  |            |
| 1<br>Milandri 2021                                                                                                   | randomised trial | serious      | not assessable | not serious  | very serious <sup>a, b</sup> | none                 | 12                 | 10         | SMD 0.16 higher<br>(0.68 lower to 1 higher)     |                   | ⊕○○○<br>Very low | CRITICAL   |
| <b>PROM - KOOS ADL (better indicated by higher values) – 5 months post-op</b>                                        |                  |              |                |              |                              |                      |                    |            |                                                 |                   |                  |            |
| 1<br>Milandri 2021                                                                                                   | randomised trial | serious      | not assessable | not serious  | very serious <sup>a, b</sup> | none                 | 12                 | 10         | SMD 0.26 lower<br>(1.1 lower to 0.58 higher)    |                   | ⊕○○○<br>Very low | CRITICAL   |
| <b>PROM - KOOS Sport (better indicated by higher values) – 5 months post-op</b>                                      |                  |              |                |              |                              |                      |                    |            |                                                 |                   |                  |            |
| 1<br>Milandri 2021                                                                                                   | randomised trial | serious      | not assessable | not serious  | very serious <sup>a, b</sup> | none                 | 12                 | 10         | SMD 0.21 lower<br>(1.05 lower to 0.63 higher)   |                   | ⊕○○○<br>Very low | CRITICAL   |
| <b>PROM - KOOS QOL (better indicated by higher values) – 5 months post-op</b>                                        |                  |              |                |              |                              |                      |                    |            |                                                 |                   |                  |            |
| 1<br>Milandri 2021                                                                                                   | randomised trial | serious      | not assessable | not serious  | very serious <sup>a, b</sup> | none                 | 12                 | 10         | SMD 0.2 lower<br>(1.04 lower to 0.64 higher)    |                   | ⊕○○○<br>Very low | CRITICAL   |
| <b>PROM - SF-36 PCL (better indicated by higher values) – 5 months post-op</b>                                       |                  |              |                |              |                              |                      |                    |            |                                                 |                   |                  |            |
| 1<br>Milandri 2021                                                                                                   | randomised trial | serious      | not assessable | not serious  | very serious <sup>a, b</sup> | none                 | 12                 | 10         | SMD 0.1 lower<br>(0.94 lower to 0.74 higher)    |                   | ⊕○○○<br>Very low | CRITICAL   |
| <b>PROM - SF-36 MCS (better indicated by higher values) – 5 months post-op</b>                                       |                  |              |                |              |                              |                      |                    |            |                                                 |                   |                  |            |
| 1<br>Milandri 2021                                                                                                   | randomised trial | serious      | not assessable | not serious  | very serious <sup>a, b</sup> | none                 | 12                 | 10         | SMD 0.09 higher<br>(0.75 lower to 0.92 higher)  |                   | ⊕○○○<br>Very low | CRITICAL   |
| <b>Functional activities</b>                                                                                         |                  |              |                |              |                              |                      |                    |            |                                                 |                   |                  |            |
| 1                                                                                                                    |                  |              |                |              |                              |                      |                    |            |                                                 |                   |                  |            |
| <b>Functional - single leg hop for distance (better indicated by higher values) – 4 months post-op</b>               |                  |              |                |              |                              |                      |                    |            |                                                 |                   |                  |            |
| 1<br>Kasmi 2021                                                                                                      | randomised trial | serious      | not assessable | not serious  | very serious <sup>a, b</sup> | none                 | 10                 | 10         | SMD 5.93 higher<br>(3.7 higher to 8.15 higher)  |                   | ⊕○○○<br>Very low | IMPORTANT  |
| <b>Functional - single leg hop for distance without hands (better indicated by higher values) – 4 months post-op</b> |                  |              |                |              |                              |                      |                    |            |                                                 |                   |                  |            |
| 1<br>Kasmi 2021                                                                                                      | randomised trial | serious      | not assessable | not serious  | very serious <sup>a, b</sup> | none                 | 10                 | 10         | SMD 4.96 higher<br>(3.03 higher to 6.88 higher) |                   | ⊕○○○<br>Very low | IMPORTANT  |
| <b>Functional - triple hop (better indicated by higher values) – 4 months post-op</b>                                |                  |              |                |              |                              |                      |                    |            |                                                 |                   |                  |            |
| 1<br>Kasmi 2021                                                                                                      | randomised trial | serious      | not assessable | not serious  | very serious <sup>a, b</sup> | none                 | 10                 | 10         | SMD 4.82 higher<br>(2.94 higher to 6.7 higher)  |                   | ⊕○○○<br>Very low | IMPORTANT  |

| Certainty assessment                                                                     |                     |              |                |              |                              |                      | No of patients     |            | Effect                                          |                   | Certainty | Importance |
|------------------------------------------------------------------------------------------|---------------------|--------------|----------------|--------------|------------------------------|----------------------|--------------------|------------|-------------------------------------------------|-------------------|-----------|------------|
| No of studies                                                                            | Study design        | Risk of bias | Inconsistency  | Indirectness | Imprecision                  | Other considerations | Eccentric training | Usual care | Relative (95% CI)                               | Absolute (95% CI) |           |            |
| <b>Functional - crossover hop (better indicated by higher values) – 4 months post-op</b> |                     |              |                |              |                              |                      |                    |            |                                                 |                   |           |            |
| 1<br>Kasmi<br>2021                                                                       | randomised<br>trial | serious      | not assessable | not serious  | very serious <sup>a, b</sup> | none                 | 10                 | 10         | SMD 5.4 higher<br>(3.34 higher to 7.47 higher)  | ⊕○○○<br>Very low  | IMPORTANT |            |
| <b>Functional - 6m-timed hop (better indicated by higher values) – 4 months post-op</b>  |                     |              |                |              |                              |                      |                    |            |                                                 |                   |           |            |
| 1<br>Kasmi<br>2021                                                                       | randomised<br>trial | serious      | not assessable | not serious  | very serious <sup>a, b</sup> | none                 | 10                 | 10         | SMD 5.15 higher<br>(3.17 higher to 7.14 higher) | ⊕○○○<br>Very low  | IMPORTANT |            |
| <b>Balance</b>                                                                           |                     |              |                |              |                              |                      |                    |            |                                                 |                   |           |            |
| 1                                                                                        |                     |              |                |              |                              |                      |                    |            |                                                 |                   |           |            |
| <b>Balance - Y balance test (better indicated by higher values) – 4 months post-op</b>   |                     |              |                |              |                              |                      |                    |            |                                                 |                   |           |            |
| 1<br>Kasmi<br>2021                                                                       | randomised<br>trial | serious      | not assessable | not serious  | very serious <sup>a, b</sup> | none                 | 10                 | 10         | SMD 0<br>(0.88 lower to 0.88 higher)            | ⊕○○○<br>Very low  | IMPORTANT |            |
| <b>Adverse events</b>                                                                    |                     |              |                |              |                              |                      |                    |            |                                                 |                   |           |            |
| Friedmann-<br>bette 2018                                                                 |                     |              |                |              |                              |                      |                    |            | None reported                                   |                   | CRITICAL  |            |
| Milandri<br>2021                                                                         |                     |              |                |              |                              |                      |                    |            | None reported                                   |                   | CRITICAL  |            |
| Kasmi<br>2021                                                                            |                     |              |                |              |                              |                      |                    |            | None reported                                   |                   | CRITICAL  |            |

CI: confidence interval; SMD: standardised mean difference

- a. Total participants <800  
b. 95% CI of an SMD extends > 0.5 points in either direction

## Isokinetic training versus isotonic training in rehabilitation after ACLR

Bibliography: Tsaklis 2002, Vidmar 2020

| Certainty assessment                                                                                                             |                     |              |                |              |                             |                      | No of patients      |                   | Effect                                                                                                       |                   | Certainty | Importance |
|----------------------------------------------------------------------------------------------------------------------------------|---------------------|--------------|----------------|--------------|-----------------------------|----------------------|---------------------|-------------------|--------------------------------------------------------------------------------------------------------------|-------------------|-----------|------------|
| No of studies                                                                                                                    | Study design        | Risk of bias | Inconsistency  | Indirectness | Imprecision                 | Other considerations | Isokinetic training | Isotonic training | Relative (95% CI)                                                                                            | Absolute (95% CI) |           |            |
| <b>Strength</b>                                                                                                                  |                     |              |                |              |                             |                      |                     |                   |                                                                                                              |                   |           |            |
| 2                                                                                                                                |                     |              |                |              |                             |                      |                     |                   |                                                                                                              |                   |           |            |
| <b>Strength - Quadriceps ISOM 60° (better indicated by higher values) – 3 months post-op</b>                                     |                     |              |                |              |                             |                      |                     |                   |                                                                                                              |                   |           |            |
| 1<br>Vidmar<br>2020                                                                                                              | randomised<br>trial | not serious  | not assessable | not serious  | very serious <sup>a,b</sup> | none                 | 15                  | 15                | SMD 1.2 higher<br>(0.41 higher to 1.99 higher)                                                               | ⊕⊕○○<br>Low       |           | CRITICAL   |
| Tsaklis<br>2002                                                                                                                  | randomised<br>trial | very serious | not assessable | not serious  | very serious <sup>a,c</sup> | none                 | 15                  | 15                | Isotonic training showed significant better results compared to isokinetic training.                         | ⊕○○○<br>Very low  |           | CRITICAL   |
| <b>Strength - Quadriceps CON 60°/s (better indicated by higher values) – 3 months post-op</b>                                    |                     |              |                |              |                             |                      |                     |                   |                                                                                                              |                   |           |            |
| 1<br>Vidmar<br>2020                                                                                                              | randomised<br>trial | not serious  | not assessable | not serious  | very serious <sup>a,b</sup> | none                 | 15                  | 15                | SMD 0.01 higher<br>(0.71 lower to 0.72 higher)                                                               | ⊕⊕○○<br>Low       |           | CRITICAL   |
| Tsaklis<br>2002                                                                                                                  | randomised<br>trial | very serious | not assessable | not serious  | very serious <sup>a,c</sup> | none                 | 15                  | 15                | Isokinetic training showed significant better results compared to isotonic training.                         | ⊕○○○<br>Very low  |           | CRITICAL   |
| <b>Strength - Quadriceps ECC 60°/s (better indicated by higher values) – 3 months post-op</b>                                    |                     |              |                |              |                             |                      |                     |                   |                                                                                                              |                   |           |            |
| 1<br>Vidmar<br>2020                                                                                                              | randomised<br>trial | not serious  | not assessable | not serious  | very serious <sup>a,b</sup> | none                 | 15                  | 15                | SMD 0.93 higher<br>(0.17 higher to 1.69 higher)                                                              | ⊕⊕○○<br>Low       |           | CRITICAL   |
| <b>Strength - H/Q ratio CON 60°/s – 3 months post-op</b>                                                                         |                     |              |                |              |                             |                      |                     |                   |                                                                                                              |                   |           |            |
| Tsaklis<br>2002                                                                                                                  | randomised<br>trial | very serious | not assessable | not serious  | very serious <sup>a,c</sup> | none                 | 15                  | 15                | Isokinetic training showed significant better results compared to isotonic training.                         | ⊕○○○<br>Very low  |           | CRITICAL   |
| <b>Strength - 1RM of quadriceps – 3 months post-op</b>                                                                           |                     |              |                |              |                             |                      |                     |                   |                                                                                                              |                   |           |            |
| Tsaklis<br>2002                                                                                                                  | randomised<br>trial | very serious | not assessable | not serious  | very serious <sup>a,c</sup> | none                 | 15                  | 15                | Combination of isotonic and isokinetic training showed significant differences compared to the other groups. | ⊕○○○<br>Very low  |           | CRITICAL   |
| <b>Atrophy</b>                                                                                                                   |                     |              |                |              |                             |                      |                     |                   |                                                                                                              |                   |           |            |
| 2                                                                                                                                |                     |              |                |              |                             |                      |                     |                   |                                                                                                              |                   |           |            |
| <b>Atrophy - vastus lateralis cross-sectional area (cm<sup>2</sup>) (better indicated by higher values) – 3 months post-op</b>   |                     |              |                |              |                             |                      |                     |                   |                                                                                                              |                   |           |            |
| 1<br>Vidmar<br>2020                                                                                                              | randomised<br>trial | not serious  | not assessable | not serious  | very serious <sup>a,b</sup> | none                 | 15                  | 15                | SMD 0.48 lower<br>(1.21 lower to 0.25 higher)                                                                | ⊕⊕○○<br>Low       |           | CRITICAL   |
| <b>Atrophy - vastus intermedius cross-sectional area (cm<sup>2</sup>) (better indicated by higher values) – 3 months post-op</b> |                     |              |                |              |                             |                      |                     |                   |                                                                                                              |                   |           |            |
| 1<br>Vidmar<br>2020                                                                                                              | randomised<br>trial | not serious  | not assessable | not serious  | very serious <sup>a,b</sup> | none                 | 15                  | 15                | SMD 0.18 lower<br>(0.89 lower to 0.54 higher)                                                                | ⊕⊕○○<br>Low       |           | CRITICAL   |
| <b>Atrophy - vastus medialis cross-sectional area (cm<sup>2</sup>) (better indicated by higher values) – 3 months post-op</b>    |                     |              |                |              |                             |                      |                     |                   |                                                                                                              |                   |           |            |
| 1<br>Vidmar<br>2020                                                                                                              | randomised<br>trial | not serious  | not assessable | not serious  | very serious <sup>a,b</sup> | none                 | 15                  | 15                | SMD 0.31 lower<br>(1.03 lower to 0.41 higher)                                                                | ⊕⊕○○<br>Low       |           | CRITICAL   |
| <b>Atrophy - rectus femoris cross-sectional area (cm<sup>2</sup>) (better indicated by higher values) – 3 months post-op</b>     |                     |              |                |              |                             |                      |                     |                   |                                                                                                              |                   |           |            |
| 1<br>Vidmar<br>2020                                                                                                              | randomised<br>trial | not serious  | not assessable | not serious  | very serious <sup>a,b</sup> | none                 | 15                  | 15                | SMD 0<br>(0.72 lower to 0.72 higher)                                                                         | ⊕⊕○○<br>Low       |           | CRITICAL   |
| <b>Atrophy - quadriceps cross-sectional area (cm<sup>2</sup>) (better indicated by higher values) – 3 months post-op</b>         |                     |              |                |              |                             |                      |                     |                   |                                                                                                              |                   |           |            |
| 1<br>Vidmar<br>2020                                                                                                              | randomised<br>trial | not serious  | not assessable | not serious  | very serious <sup>a,b</sup> | none                 | 15                  | 15                | SMD 0.42 lower<br>(1.15 lower to 0.3 higher)                                                                 | ⊕⊕○○<br>Low       |           | CRITICAL   |
| <b>Atrophy - thigh circumference – 3 months post-op</b>                                                                          |                     |              |                |              |                             |                      |                     |                   |                                                                                                              |                   |           |            |

| Certainty assessment                                                                                   |                  |              |                |              |                             |                      | No of patients      |                   | Effect                                                                                                                                                                                                |                   | Certainty        | Importance |
|--------------------------------------------------------------------------------------------------------|------------------|--------------|----------------|--------------|-----------------------------|----------------------|---------------------|-------------------|-------------------------------------------------------------------------------------------------------------------------------------------------------------------------------------------------------|-------------------|------------------|------------|
| No of studies                                                                                          | Study design     | Risk of bias | Inconsistency  | Indirectness | Imprecision                 | Other considerations | Isokinetic training | Isotonic training | Relative (95% CI)                                                                                                                                                                                     | Absolute (95% CI) |                  |            |
| Tsaklis 2002                                                                                           | randomised trial | very serious | not assessable | not serious  | very serious <sup>a,c</sup> | none                 | 15                  | 15                | The authors reported no difference between groups. Combination of isotonic and isokinetic training showed significant thigh circumference increase compared to the two training methods in isolation. |                   | ⊕○○○<br>Very low | CRITICAL   |
| <b>Patient reported outcomes (PROM)</b>                                                                |                  |              |                |              |                             |                      |                     |                   |                                                                                                                                                                                                       |                   |                  |            |
| 1                                                                                                      |                  |              |                |              |                             |                      |                     |                   |                                                                                                                                                                                                       |                   |                  |            |
| <b>PROM – Lysholm scale (better indicated by higher values) – 3 months post-op</b>                     |                  |              |                |              |                             |                      |                     |                   |                                                                                                                                                                                                       |                   |                  |            |
| 1 Vidmar 2020                                                                                          | randomised trial | serious      | not assessable | not serious  | very serious <sup>a,b</sup> | none                 | 15                  | 15                | SMD 1.05 higher<br>(0.28 higher to 1.82 higher)                                                                                                                                                       |                   | ⊕○○○<br>Very low | CRITICAL   |
| <b>Functional activities</b>                                                                           |                  |              |                |              |                             |                      |                     |                   |                                                                                                                                                                                                       |                   |                  |            |
| 1                                                                                                      |                  |              |                |              |                             |                      |                     |                   |                                                                                                                                                                                                       |                   |                  |            |
| <b>Functional - single leg hop for distance (better indicated by higher values) – 3 months post-op</b> |                  |              |                |              |                             |                      |                     |                   |                                                                                                                                                                                                       |                   |                  |            |
| 1 Vidmar 2020                                                                                          | randomised trial | serious      | not assessable | not serious  | very serious <sup>a,b</sup> | none                 | 15                  | 15                | SMD 0.16 higher<br>(0.56 lower to 0.88 higher)                                                                                                                                                        |                   | ⊕○○○<br>Very low | IMPORTANT  |
| <b>Adverse events</b>                                                                                  |                  |              |                |              |                             |                      |                     |                   |                                                                                                                                                                                                       |                   |                  |            |
| Tsaklis 2002                                                                                           |                  |              |                |              |                             |                      |                     |                   | None reported                                                                                                                                                                                         |                   |                  | CRITICAL   |
| Vidmar 2020                                                                                            |                  |              |                |              |                             |                      |                     |                   | None reported                                                                                                                                                                                         |                   |                  | CRITICAL   |

CI: confidence interval; SMD: standardised mean difference

- a. Total participants <800  
b. 95% CI of an SMD extends > 0.5 points in either direction  
c. Not reporting results or SDs

## Low intensity versus high intensity resistance training in rehabilitation after ACLR

Bibliography: Bieler 2014

| Certainty assessment                                                                                                   |                  |              |                |              |                             |                      | No of patients |                | Effect                                          |                   | Certainty        | Importance |
|------------------------------------------------------------------------------------------------------------------------|------------------|--------------|----------------|--------------|-----------------------------|----------------------|----------------|----------------|-------------------------------------------------|-------------------|------------------|------------|
| No of studies                                                                                                          | Study design     | Risk of bias | Inconsistency  | Indirectness | Imprecision                 | Other considerations | Low intensity  | High intensity | Relative (95% CI)                               | Absolute (95% CI) |                  |            |
| <b>Strength</b>                                                                                                        |                  |              |                |              |                             |                      |                |                |                                                 |                   |                  |            |
| 1                                                                                                                      |                  |              |                |              |                             |                      |                |                |                                                 |                   |                  |            |
| <b>Strength - Quadriceps power using leg extensor power rig (better indicated by higher values) – 5 months post-op</b> |                  |              |                |              |                             |                      |                |                |                                                 |                   |                  |            |
| 1<br>Bieler 2014                                                                                                       | randomised trial | very serious | not assessable | not serious  | very serious <sup>a,b</sup> | none                 | 20             | 18             | SMD 0<br>(0.64 lower to 0.64 higher)            |                   | ⊕○○○<br>Very low | CRITICAL   |
| <b>Patient reported outcomes (PROM)</b>                                                                                |                  |              |                |              |                             |                      |                |                |                                                 |                   |                  |            |
| 1                                                                                                                      |                  |              |                |              |                             |                      |                |                |                                                 |                   |                  |            |
| <b>PROM - Tegner Activity Scale (better indicated by higher values) – 5 months post-op</b>                             |                  |              |                |              |                             |                      |                |                |                                                 |                   |                  |            |
| 1<br>Bieler 2014                                                                                                       | randomised trial | very serious | not assessable | not serious  | very serious <sup>a,b</sup> | none                 | 20             | 18             | SMD 1.15 lower<br>(1.84 lower to 0.46 lower)    |                   | ⊕○○○<br>Very low | CRITICAL   |
| <b>PROM - Lysholm Score (better indicated by higher values) – 5 months post-op</b>                                     |                  |              |                |              |                             |                      |                |                |                                                 |                   |                  |            |
| 1<br>Bieler 2014                                                                                                       | randomised trial | very serious | not assessable | not serious  | very serious <sup>a,b</sup> | none                 | 20             | 18             | SMD 0.66 higher<br>(0 to 1.32 higher)           |                   | ⊕○○○<br>Very low | CRITICAL   |
| <b>PROM - KOOS Pain (better indicated by higher values) – 5 months post-op</b>                                         |                  |              |                |              |                             |                      |                |                |                                                 |                   |                  |            |
| 1<br>Bieler 2014                                                                                                       | randomised trial | very serious | not assessable | not serious  | very serious <sup>a,b</sup> | none                 | 20             | 18             | SMD 0.27 higher<br>(0.37 lower to 0.91 higher)  |                   | ⊕○○○<br>Very low | CRITICAL   |
| <b>PROM - KOOS Symptoms (better indicated by higher values) – 5 months post-op</b>                                     |                  |              |                |              |                             |                      |                |                |                                                 |                   |                  |            |
| 1<br>Bieler 2014                                                                                                       | randomised trial | very serious | not assessable | not serious  | very serious <sup>a,b</sup> | none                 | 20             | 18             | SMD 0.9 lower<br>(1.57 lower to 0.23 lower)     |                   | ⊕○○○<br>Very low | CRITICAL   |
| <b>PROM - KOOS ADL (better indicated by higher values) – 5 months post-op</b>                                          |                  |              |                |              |                             |                      |                |                |                                                 |                   |                  |            |
| 1<br>Bieler 2014                                                                                                       | randomised trial | very serious | not assessable | not serious  | very serious <sup>a,b</sup> | none                 | 20             | 18             | SMD 0.79 higher<br>(0.13 higher to 1.45 higher) |                   | ⊕○○○<br>Very low | CRITICAL   |
| <b>PROM - KOOS Sport (better indicated by higher values) – 5 months post-op</b>                                        |                  |              |                |              |                             |                      |                |                |                                                 |                   |                  |            |
| 1<br>Bieler 2014                                                                                                       | randomised trial | very serious | not assessable | not serious  | very serious <sup>a,b</sup> | none                 | 20             | 18             | SMD 0.37 lower<br>(1.02 lower to 0.27 higher)   |                   | ⊕○○○<br>Very low | CRITICAL   |
| <b>PROM - KOOS QOL (better indicated by higher values) – 5 months post-op</b>                                          |                  |              |                |              |                             |                      |                |                |                                                 |                   |                  |            |
| 1<br>Bieler 2014                                                                                                       | randomised trial | very serious | not assessable | not serious  | very serious <sup>a,b</sup> | none                 | 20             | 18             | SMD 0.28 higher<br>(0.36 lower to 0.92 higher)  |                   | ⊕○○○<br>Very low | CRITICAL   |
| <b>Functional activities</b>                                                                                           |                  |              |                |              |                             |                      |                |                |                                                 |                   |                  |            |
| 1                                                                                                                      |                  |              |                |              |                             |                      |                |                |                                                 |                   |                  |            |
| <b>Functional - Single leg hop for distance (better indicated by higher values) – 5 months post-op</b>                 |                  |              |                |              |                             |                      |                |                |                                                 |                   |                  |            |
| 1<br>Bieler 2014                                                                                                       | randomised trial | very serious | not assessable | not serious  | very serious <sup>a,b</sup> | none                 | 20             | 18             | SMD 0.17 lower<br>(0.81 lower to 0.46 higher)   |                   | ⊕○○○<br>Very low | IMPORTANT  |
| <b>Functional - Triple hop (better indicated by higher values) – 5 months post-op</b>                                  |                  |              |                |              |                             |                      |                |                |                                                 |                   |                  |            |
| 1<br>Bieler 2014                                                                                                       | randomised trial | very serious | not assessable | not serious  | very serious <sup>a,b</sup> | none                 | 20             | 18             | SMD 0.42 lower<br>(1.06 lower to 0.23 higher)   |                   | ⊕○○○<br>Very low | IMPORTANT  |
| <b>Laxity</b>                                                                                                          |                  |              |                |              |                             |                      |                |                |                                                 |                   |                  |            |
| 1                                                                                                                      |                  |              |                |              |                             |                      |                |                |                                                 |                   |                  |            |
| <b>Laxity - laxity (better indicated by lower values) – 5 months post-op</b>                                           |                  |              |                |              |                             |                      |                |                |                                                 |                   |                  |            |
| 1<br>Bieler 2014                                                                                                       | randomised trial | very serious | not assessable | not serious  | very serious <sup>a,b</sup> | none                 | 20             | 18             | SMD 0.22 lower<br>(0.86 lower to 0.41 higher)   |                   | ⊕○○○<br>Very low | CRITICAL   |
| <b>Adverse events</b>                                                                                                  |                  |              |                |              |                             |                      |                |                |                                                 |                   |                  |            |
| Bieler 2014                                                                                                            |                  |              |                |              |                             |                      |                |                | None reported                                   |                   |                  | CRITICAL   |

CI: confidence interval; SMD: standardised mean difference

129

Aspetar clinical practice guideline on rehabilitation after ACLR: Supplementary file

- a. Total participants <800
- b. 95% CI of an SMD extends > 0.5 points in either direction

## Motor control training versus usual care in rehabilitation after ACLR

**Bibliography:** Cappellino 2012, Cho 2013, Kaya 2019, Shen 2021, Hajouj 2021, Baltaci 2013, Bartels 2016

| No of studies                                                                                                                             | Study design     | Risk of bias | Certainty assessment |              |                             |                           | No of patients         |            | Effect                                         |                   | Certainty | Importance |
|-------------------------------------------------------------------------------------------------------------------------------------------|------------------|--------------|----------------------|--------------|-----------------------------|---------------------------|------------------------|------------|------------------------------------------------|-------------------|-----------|------------|
|                                                                                                                                           |                  |              | Inconsistency        | Indirectness | Imprecision                 | Other considerations      | Motor control training | Usual care | Relative (95% CI)                              | Absolute (95% CI) |           |            |
| <b>Proprioception</b>                                                                                                                     |                  |              |                      |              |                             |                           |                        |            |                                                |                   |           |            |
| 5                                                                                                                                         |                  |              |                      |              |                             |                           |                        |            |                                                |                   |           |            |
| <b>Proprioception - Angle reproduction test 20° (better indicated by lower values) – 4 weeks post-op</b>                                  |                  |              |                      |              |                             |                           |                        |            |                                                |                   |           |            |
| 1<br>Shen 2021                                                                                                                            | randomised trial | very serious | not assessable       | not serious  | very serious <sup>a,b</sup> | none                      | 10                     | 10         | SMD 1.97 lower<br>(3.08 lower to 0.86 lower)   | ⊕○○○<br>Very low  | CRITICAL  |            |
| <b>Proprioception - Angle reproduction test 50° (better indicated by lower values) – 4 weeks post-op</b>                                  |                  |              |                      |              |                             |                           |                        |            |                                                |                   |           |            |
| 1<br>Shen 2021                                                                                                                            | randomised trial | very serious | not assessable       | not serious  | very serious <sup>a,b</sup> | none                      | 10                     | 10         | SMD 2.16 lower<br>(3.31 lower to 1.01 lower)   | ⊕○○○<br>Very low  | CRITICAL  |            |
| <b>Proprioception - Angle reproduction test 80° (better indicated by lower values) – 4 weeks post-op</b>                                  |                  |              |                      |              |                             |                           |                        |            |                                                |                   |           |            |
| 1<br>Shen 2021                                                                                                                            | randomised trial | very serious | not assessable       | not serious  | very serious <sup>a,b</sup> | none                      | 10                     | 10         | SMD 1.77 lower<br>(2.84 lower to 0.7 lower)    | ⊕○○○<br>Very low  | CRITICAL  |            |
| <b>Proprioception - Passive motion perception test 20° (better indicated by lower values) – 4 weeks post-op</b>                           |                  |              |                      |              |                             |                           |                        |            |                                                |                   |           |            |
| 1<br>Shen 2021                                                                                                                            | randomised trial | very serious | not assessable       | not serious  | very serious <sup>a,b</sup> | none                      | 10                     | 10         | SMD 2.11 lower<br>(3.25 lower to 0.97 lower)   | ⊕○○○<br>Very low  | CRITICAL  |            |
| <b>Proprioception - Passive motion perception test 50° (better indicated by lower values) – 4 weeks post-op</b>                           |                  |              |                      |              |                             |                           |                        |            |                                                |                   |           |            |
| 1<br>Shen 2021                                                                                                                            | randomised trial | very serious | not assessable       | not serious  | very serious <sup>a,b</sup> | none                      | 10                     | 10         | SMD 2.16 lower<br>(3.31 lower to 1.01 lower)   | ⊕○○○<br>Very low  | CRITICAL  |            |
| <b>Proprioception - Passive motion perception test 80° (better indicated by lower values) – 4 weeks post-op</b>                           |                  |              |                      |              |                             |                           |                        |            |                                                |                   |           |            |
| 1<br>Shen 2021                                                                                                                            | randomised trial | very serious | not assessable       | not serious  | very serious <sup>a,b</sup> | very serious <sup>a</sup> | 10                     | 10         | SMD 1.5 lower<br>(2.52 lower to 0.49 lower)    | ⊕○○○<br>Very low  | CRITICAL  |            |
| <b>Proprioception - first movement deviation difference between limbs (better indicated by lower values) – 2 months post-op</b>           |                  |              |                      |              |                             |                           |                        |            |                                                |                   |           |            |
| 1<br>Baltaci 2013                                                                                                                         | randomised trial | serious      | not assessable       | not serious  | very serious <sup>a,b</sup> | none                      | 15                     | 15         | SMD 0.23 lower<br>(0.95 lower to 0.49 higher)  | ⊕○○○<br>Very low  | CRITICAL  |            |
| <b>Proprioception - first movement deviation difference between limbs (better indicated by lower values) – 3 months post-op</b>           |                  |              |                      |              |                             |                           |                        |            |                                                |                   |           |            |
| 1<br>Baltaci 2013                                                                                                                         | randomised trial | serious      | not assessable       | not serious  | very serious <sup>a,b</sup> | none                      | 15                     | 15         | SMD 0.06 higher<br>(0.65 lower to 0.78 higher) | ⊕○○○<br>Very low  | CRITICAL  |            |
| <b>Proprioception - second movement deviation difference between limbs (better indicated by lower values) – 2 months post-op</b>          |                  |              |                      |              |                             |                           |                        |            |                                                |                   |           |            |
| 1<br>Baltaci 2013                                                                                                                         | randomised trial | serious      | not assessable       | not serious  | very serious <sup>a,b</sup> | none                      | 15                     | 15         | SMD 0.52 lower<br>(1.25 lower to 0.21 higher)  | ⊕○○○<br>Very low  | CRITICAL  |            |
| <b>Proprioception - second movement deviation difference between limbs (better indicated by lower values) – 3 months post-op</b>          |                  |              |                      |              |                             |                           |                        |            |                                                |                   |           |            |
| 1<br>Baltaci 2013                                                                                                                         | randomised trial | serious      | not assessable       | not serious  | very serious <sup>a,b</sup> | none                      | 15                     | 15         | SMD 0.38 higher<br>(0.34 lower to 1.1 higher)  | ⊕○○○<br>Very low  | CRITICAL  |            |
| <b>Proprioception - joint position sense 45° - Absolute error (better indicated by lower values) – 15 weeks post-op</b>                   |                  |              |                      |              |                             |                           |                        |            |                                                |                   |           |            |
| 1<br>Hajouj 2021                                                                                                                          | randomised trial | very serious | not assessable       | not serious  | very serious <sup>a,b</sup> | none                      | 15                     | 15         | SMD 2.41 lower<br>(3.38 lower to 1.44 lower)   | ⊕○○○<br>Very low  | CRITICAL  |            |
| <b>proprioception - joint position sense 45° - Variable error (better indicated by lower values) – 15 weeks post-op</b>                   |                  |              |                      |              |                             |                           |                        |            |                                                |                   |           |            |
| 1<br>Hajouj 2021                                                                                                                          | randomised trial | very serious | not assessable       | not serious  | very serious <sup>a,b</sup> | none                      | 15                     | 15         | SMD 2.58 lower<br>(3.58 lower to 1.58 lower)   | ⊕○○○<br>Very low  | CRITICAL  |            |
| <b>Proprioception - joint position sense 45° - Constant error (better indicated by lower values) – 15 weeks post-op</b>                   |                  |              |                      |              |                             |                           |                        |            |                                                |                   |           |            |
| 1<br>Hajouj 2021                                                                                                                          | randomised trial | very serious | not assessable       | not serious  | very serious <sup>a,b</sup> | none                      | 15                     | 15         | SMD 0.1 higher<br>(0.61 lower to 0.82 higher)  | ⊕○○○<br>Very low  | CRITICAL  |            |
| <b>Proprioception - joint position sense at 15° (better indicated by lower values) post intervention; duration of program was 6 weeks</b> |                  |              |                      |              |                             |                           |                        |            |                                                |                   |           |            |
| 1<br>Cho 2013                                                                                                                             | randomised trial | very serious | not assessable       | not serious  | very serious <sup>a,b</sup> | none                      | 14                     | 14         | SMD 0.12 higher<br>(0.62 lower to 0.86 higher) | ⊕○○○<br>Very low  | CRITICAL  |            |
| <b>Proprioception - joint position sense at 45° (better indicated by lower values) post intervention; duration of program was 6 weeks</b> |                  |              |                      |              |                             |                           |                        |            |                                                |                   |           |            |

| Certainty assessment                                                                                                                                  |                 |                  |               |                |             |                             | No of patients         |            | Effect            |                                                | Certainty        | Importance |
|-------------------------------------------------------------------------------------------------------------------------------------------------------|-----------------|------------------|---------------|----------------|-------------|-----------------------------|------------------------|------------|-------------------|------------------------------------------------|------------------|------------|
| No of studies                                                                                                                                         | Study design    | Risk of bias     | Inconsistency | Indirectness   | Imprecision | Other considerations        | Motor control training | Usual care | Relative (95% CI) | Absolute (95% CI)                              |                  |            |
| 1                                                                                                                                                     | Cho 2013        | randomised trial | very serious  | not assessable | not serious | very serious <sup>a,b</sup> | none                   | 14         | 14                | SMD 0.6 lower<br>(1.36 lower to 0.16 higher)   | ⊕○○○<br>Very low | CRITICAL   |
| <b>Proprioception - joint position sense 15° (better indicated by lower values), 2 years after surgery</b>                                            |                 |                  |               |                |             |                             |                        |            |                   |                                                |                  |            |
| 1                                                                                                                                                     | Kaya 2019       | randomised trial | very serious  | not assessable | not serious | very serious <sup>a,b</sup> | none                   | 17         | 15                | SMD 0.59 lower<br>(1.3 lower to 0.12 higher)   | ⊕○○○<br>Very low | CRITICAL   |
| <b>Proprioception - joint position sense 45° (better indicated by lower values), 2 years after surgery</b>                                            |                 |                  |               |                |             |                             |                        |            |                   |                                                |                  |            |
| 1                                                                                                                                                     | Kaya 2019       | randomised trial | very serious  | not assessable | not serious | very serious <sup>a,b</sup> | none                   | 17         | 15                | SMD 0.35 lower<br>(1.05 lower to 0.35 higher)  | ⊕○○○<br>Very low | CRITICAL   |
| <b>Proprioception - joint position sense 75° (better indicated by lower values), 2 years after surgery</b>                                            |                 |                  |               |                |             |                             |                        |            |                   |                                                |                  |            |
| 1                                                                                                                                                     | Kaya 2019       | randomised trial | very serious  | not assessable | not serious | very serious <sup>a,b</sup> | none                   | 17         | 15                | SMD 0.45 lower<br>(1.16 lower to 0.25 higher)  | ⊕○○○<br>Very low | CRITICAL   |
| <b>Balance</b>                                                                                                                                        |                 |                  |               |                |             |                             |                        |            |                   |                                                |                  |            |
| 2                                                                                                                                                     |                 |                  |               |                |             |                             |                        |            |                   |                                                |                  |            |
| <b>Balance - star excursion balance test anterior direction, difference between limbs (better indicated by lower values) – 2 months post-op</b>       |                 |                  |               |                |             |                             |                        |            |                   |                                                |                  |            |
| 1                                                                                                                                                     | Baltaci 2013    | randomised trial | serious       | not assessable | not serious | very serious <sup>a,b</sup> | none                   | 15         | 15                | SMD 0.08 higher<br>(0.64 lower to 0.79 higher) | ⊕○○○<br>Very low | CRITICAL   |
| <b>Balance - star excursion balance test anterior direction, difference between limbs (better indicated by lower values) – 3 months post-op</b>       |                 |                  |               |                |             |                             |                        |            |                   |                                                |                  |            |
| 1                                                                                                                                                     | Baltaci 2013    | randomised trial | serious       | not assessable | not serious | very serious <sup>a,b</sup> | none                   | 15         | 15                | SMD 0.28 lower<br>(1 lower to 0.44 higher)     | ⊕○○○<br>Very low | CRITICAL   |
| <b>Balance - star excursion balance test posteromedial direction, difference between limbs (better indicated by lower values) – 2 months post-op</b>  |                 |                  |               |                |             |                             |                        |            |                   |                                                |                  |            |
| 1                                                                                                                                                     | Baltaci 2013    | randomised trial | serious       | not assessable | not serious | very serious <sup>a,b</sup> | none                   | 15         | 15                | SMD 0.54 lower<br>(1.27 lower to 0.19 higher)  | ⊕○○○<br>Very low | CRITICAL   |
| <b>Balance - star excursion balance test posteromedial direction, difference between limbs (better indicated by lower values) – 3 months post-op</b>  |                 |                  |               |                |             |                             |                        |            |                   |                                                |                  |            |
| 1                                                                                                                                                     | Baltaci 2013    | randomised trial | serious       | not assessable | not serious | very serious <sup>a,b</sup> | none                   | 15         | 15                | SMD 0.38 lower<br>(1.1 lower to 0.34 higher)   | ⊕○○○<br>Very low | CRITICAL   |
| <b>Balance - star excursion balance test posterolateral direction, difference between limbs (better indicated by lower values) – 2 months post-op</b> |                 |                  |               |                |             |                             |                        |            |                   |                                                |                  |            |
| 1                                                                                                                                                     | Baltaci 2013    | randomised trial | serious       | not assessable | not serious | very serious <sup>a,b</sup> | none                   | 15         | 15                | SMD 0.55 lower<br>(1.28 lower to 0.19 higher)  | ⊕○○○<br>Very low | CRITICAL   |
| <b>Balance - star excursion balance test posterolateral direction, difference between limbs (better indicated by lower values) – 3 months post-op</b> |                 |                  |               |                |             |                             |                        |            |                   |                                                |                  |            |
| 1                                                                                                                                                     | Baltaci 2013    | randomised trial | serious       | not assessable | not serious | very serious <sup>a,b</sup> | none                   | 15         | 15                | SMD 0.72 lower<br>(1.47 lower to 0.02 higher)  | ⊕○○○<br>Very low | CRITICAL   |
| <b>Balance - Static baropodometric test (difference in loading between limbs) (better indicated by lower values) – 3 months post-op</b>               |                 |                  |               |                |             |                             |                        |            |                   |                                                |                  |            |
| 1                                                                                                                                                     | Cappellino 2012 | randomised trial | very serious  | not assessable | not serious | very serious <sup>a,b</sup> | none                   | 7          | 7                 | SMD 0.63 higher<br>(0.45 lower to 1.72 higher) | ⊕○○○<br>Very low | CRITICAL   |
| <b>Balance - Static baropodometric test (difference in loading between limbs) (better indicated by lower values) – 6 months post-op</b>               |                 |                  |               |                |             |                             |                        |            |                   |                                                |                  |            |
| 1                                                                                                                                                     | Cappellino 2012 | randomised trial | very serious  | not assessable | not serious | very serious <sup>a,b</sup> | none                   | 7          | 7                 | SMD 1.08 lower<br>(2.22 lower to 0.07 higher)  | ⊕○○○<br>Very low | CRITICAL   |
| <b>Balance - Dynamic baropodometric test (difference in loading between limbs) (better indicated by lower values) – 3 months post-op</b>              |                 |                  |               |                |             |                             |                        |            |                   |                                                |                  |            |
| 1                                                                                                                                                     | Cappellino 2012 | randomised trial | very serious  | not assessable | not serious | very serious <sup>a,b</sup> | none                   | 7          | 7                 | SMD 0.16 higher<br>(0.89 lower to 1.21 higher) | ⊕○○○<br>Very low | CRITICAL   |
| <b>Balance - Dynamic baropodometric test (difference in loading between limbs) (better indicated by lower values) – 6 months post-op</b>              |                 |                  |               |                |             |                             |                        |            |                   |                                                |                  |            |
| 1                                                                                                                                                     | Cappellino 2012 | randomised trial | very serious  | not assessable | not serious | very serious <sup>a,b</sup> | none                   | 7          | 7                 | SMD 0.57 lower<br>(1.64 lower to 0.51 higher)  | ⊕○○○<br>Very low | CRITICAL   |
| <b>Coordination</b>                                                                                                                                   |                 |                  |               |                |             |                             |                        |            |                   |                                                |                  |            |
| 1                                                                                                                                                     |                 |                  |               |                |             |                             |                        |            |                   |                                                |                  |            |
| <b>Coordination - concentric deviation difference between limbs (better indicated by lower values) – 2 months post-op</b>                             |                 |                  |               |                |             |                             |                        |            |                   |                                                |                  |            |

| Certainty assessment                                                                                                                   |                  |              |                |              |                             |                      | No of patients         |            | Effect                                          |                   | Certainty        | Importance |
|----------------------------------------------------------------------------------------------------------------------------------------|------------------|--------------|----------------|--------------|-----------------------------|----------------------|------------------------|------------|-------------------------------------------------|-------------------|------------------|------------|
| No of studies                                                                                                                          | Study design     | Risk of bias | Inconsistency  | Indirectness | Imprecision                 | Other considerations | Motor control training | Usual care | Relative (95% CI)                               | Absolute (95% CI) |                  |            |
| 1<br>Baltaci 2013                                                                                                                      | randomised trial | serious      | not assessable | not serious  | very serious <sup>a,b</sup> | none                 | 15                     | 15         | SMD 0.28 lower<br>(1 lower to 0.44 higher)      |                   | ⊕○○○<br>Very low | CRITICAL   |
| <b>Coordination - coordination concentric deviation difference between limbs (better indicated by lower values) – 3 months post-op</b> |                  |              |                |              |                             |                      |                        |            |                                                 |                   |                  |            |
| 1<br>Baltaci 2013                                                                                                                      | randomised trial | serious      | not assessable | not serious  | very serious <sup>a,b</sup> | none                 | 15                     | 15         | SMD 0.21 higher<br>(0.51 lower to 0.93 higher)  |                   | ⊕○○○<br>Very low | CRITICAL   |
| <b>Coordination - eccentric deviation deficit difference between limbs (better indicated by lower values) – 2 months post-op</b>       |                  |              |                |              |                             |                      |                        |            |                                                 |                   |                  |            |
| 1<br>Baltaci 2013                                                                                                                      | randomised trial | serious      | not assessable | not serious  | very serious <sup>a,b</sup> | none                 | 15                     | 15         | SMD 0.04 higher<br>(0.68 lower to 0.75 higher)  |                   | ⊕○○○<br>Very low | CRITICAL   |
| <b>Coordination - eccentric deviation deficit difference between limbs (better indicated by lower values) – 3 months post-op</b>       |                  |              |                |              |                             |                      |                        |            |                                                 |                   |                  |            |
| 1<br>Baltaci 2013                                                                                                                      | randomised trial | serious      | not assessable | not serious  | very serious <sup>a,b</sup> | none                 | 15                     | 15         | SMD 0.38 lower<br>(1.1 lower to 0.34 higher)    |                   | ⊕○○○<br>Very low | CRITICAL   |
| <b>Reactivity</b>                                                                                                                      |                  |              |                |              |                             |                      |                        |            |                                                 |                   |                  |            |
| 2                                                                                                                                      |                  |              |                |              |                             |                      |                        |            |                                                 |                   |                  |            |
| <b>Reactivity - response label time to finish difference between limbs (better indicated by lower values) – 2 months post-op</b>       |                  |              |                |              |                             |                      |                        |            |                                                 |                   |                  |            |
| 1<br>Baltaci 2013                                                                                                                      | randomised trial | serious      | not assessable | not serious  | very serious <sup>a,b</sup> | none                 | 15                     | 15         | SMD 0.07 higher<br>(0.64 lower to 0.79 higher)  |                   | ⊕○○○<br>Very low | CRITICAL   |
| <b>Reactivity - response label time to finish difference between limbs (better indicated by lower values) – 3 months post-op</b>       |                  |              |                |              |                             |                      |                        |            |                                                 |                   |                  |            |
| 1<br>Baltaci 2013                                                                                                                      | randomised trial | serious      | not assessable | not serious  | very serious <sup>a,b</sup> | none                 | 15                     | 15         | SMD 0.25 lower<br>(0.97 lower to 0.47 higher)   |                   | ⊕○○○<br>Very low | CRITICAL   |
| <b>Reactivity - response time difference between limbs (better indicated by lower values) – 2 months post-op</b>                       |                  |              |                |              |                             |                      |                        |            |                                                 |                   |                  |            |
| 1<br>Baltaci 2013                                                                                                                      | randomised trial | serious      | not assessable | not serious  | very serious <sup>a,b</sup> | none                 | 15                     | 15         | SMD 0.2 higher<br>(0.52 lower to 0.92 higher)   |                   | ⊕○○○<br>Very low | CRITICAL   |
| <b>Reactivity - response time difference between limbs (better indicated by lower values) – 3 months post-op</b>                       |                  |              |                |              |                             |                      |                        |            |                                                 |                   |                  |            |
| 1<br>Baltaci 2013                                                                                                                      | randomised trial | serious      | not assessable | not serious  | very serious <sup>a,b</sup> | none                 | 15                     | 15         | SMD 0.25 lower<br>(0.97 lower to 0.46 higher)   |                   | ⊕○○○<br>Very low | CRITICAL   |
| <b>Reactivity - ground contact time during a reaction test (better indicated by lower values) – 6 months post-op</b>                   |                  |              |                |              |                             |                      |                        |            |                                                 |                   |                  |            |
| 1<br>Bartels 2016                                                                                                                      | randomised trial | very serious | not assessable | not serious  | very serious <sup>a,b</sup> | none                 | 28                     | 22         | SMD 0.36 lower<br>(0.92 lower to 0.2 higher)    |                   | ⊕○○○<br>Very low | CRITICAL   |
| <b>Reactivity - reaction time (better indicated by lower values) – 6 months post-op</b>                                                |                  |              |                |              |                             |                      |                        |            |                                                 |                   |                  |            |
| 1<br>Bartels 2016                                                                                                                      | randomised trial | very serious | not assessable | not serious  | very serious <sup>a,b</sup> | none                 | 28                     | 22         | SMD 1.21 lower<br>(1.82 lower to 0.60 lower)    |                   | ⊕○○○<br>Very low | CRITICAL   |
| <b>Patient reported outcome measures (PROM)</b>                                                                                        |                  |              |                |              |                             |                      |                        |            |                                                 |                   |                  |            |
| 3                                                                                                                                      |                  |              |                |              |                             |                      |                        |            |                                                 |                   |                  |            |
| <b>PROM - SF-36 Physical activity (better indicated by higher values) – 3 months post-op</b>                                           |                  |              |                |              |                             |                      |                        |            |                                                 |                   |                  |            |
| 1<br>Cappellino 2012                                                                                                                   | randomised trial | very serious | not assessable | not serious  | very serious <sup>a,b</sup> | none                 | 7                      | 7          | SMD 1.73 higher<br>(0.44 higher to 3.02 higher) |                   | ⊕○○○<br>Very low | CRITICAL   |
| <b>PROM - SF-36 Physical activity (better indicated by higher values) – 6 months post-op</b>                                           |                  |              |                |              |                             |                      |                        |            |                                                 |                   |                  |            |
| 1<br>Cappellino 2012                                                                                                                   | randomised trial | very serious | not assessable | not serious  | very serious <sup>a,b</sup> | none                 | 7                      | 7          | SMD 0.71 higher<br>(0.38 lower to 1.8 higher)   |                   | ⊕○○○<br>Very low | CRITICAL   |
| <b>PROM - SF-36 Physical role (better indicated by higher values) – 3 months post-op</b>                                               |                  |              |                |              |                             |                      |                        |            |                                                 |                   |                  |            |
| 1<br>Cappellino 2012                                                                                                                   | randomised trial | very serious | not assessable | not serious  | very serious <sup>a,b</sup> | none                 | 7                      | 7          | SMD 0.73 lower<br>(1.83 lower to 0.36 higher)   |                   | ⊕○○○<br>Very low | CRITICAL   |
| <b>PROM - SF-36 Physical role (better indicated by higher values) – 6 months post-op</b>                                               |                  |              |                |              |                             |                      |                        |            |                                                 |                   |                  |            |

| Certainty assessment                                                                                     |                  |              |                |              |                             |                      | No of patients         |            | Effect                                         |                   | Certainty        | Importance |
|----------------------------------------------------------------------------------------------------------|------------------|--------------|----------------|--------------|-----------------------------|----------------------|------------------------|------------|------------------------------------------------|-------------------|------------------|------------|
| No of studies                                                                                            | Study design     | Risk of bias | Inconsistency  | Indirectness | Imprecision                 | Other considerations | Motor control training | Usual care | Relative (95% CI)                              | Absolute (95% CI) |                  |            |
| 1<br>Cappellino 2012                                                                                     | randomised trial | very serious | not assessable | not serious  | very serious <sup>a,b</sup> | none                 | 7                      | 7          | SMD 0.3 higher<br>(0.75 lower to 1.36 higher)  |                   | ⊕○○○<br>Very low | CRITICAL   |
| <b>PROM - SF-36 Bodily pain (better indicated by higher values) – 3 months post-op</b>                   |                  |              |                |              |                             |                      |                        |            |                                                |                   |                  |            |
| 1<br>Cappellino 2012                                                                                     | randomised trial | very serious | not assessable | not serious  | very serious <sup>a,b</sup> | none                 | 7                      | 7          | SMD 0.49 higher<br>(0.58 lower to 1.56 higher) |                   | ⊕○○○<br>Very low | CRITICAL   |
| <b>PROM - SF-36 Bodily pain (better indicated by higher values) – 6 months post-op</b>                   |                  |              |                |              |                             |                      |                        |            |                                                |                   |                  |            |
| 1<br>Cappellino 2012                                                                                     | randomised trial | very serious | not assessable | not serious  | very serious <sup>a,b</sup> | none                 | 7                      | 7          | SMD 0.42 higher<br>(0.64 lower to 1.49 higher) |                   | ⊕○○○<br>Very low | CRITICAL   |
| <b>PROM - SF-36 General health (better indicated by higher values) – 3 months post-op</b>                |                  |              |                |              |                             |                      |                        |            |                                                |                   |                  |            |
| 1<br>Cappellino 2012                                                                                     | randomised trial | very serious | not assessable | not serious  | very serious <sup>a,b</sup> | none                 | 7                      | 7          | SMD 0<br>(1.05 lower to 1.05 higher)           |                   | ⊕○○○<br>Very low | CRITICAL   |
| <b>PROM - SF-36 General health (better indicated by higher values) – 6 months post-op</b>                |                  |              |                |              |                             |                      |                        |            |                                                |                   |                  |            |
| 1<br>Cappellino 2012                                                                                     | randomised trial | very serious | not assessable | not serious  | very serious <sup>a,b</sup> | none                 | 7                      | 7          | SMD 0.6 lower<br>(1.68 lower to 0.48 higher)   |                   | ⊕○○○<br>Very low | CRITICAL   |
| <b>PROM - SF-36 Vitality (better indicated by higher values) – 3 months post-op</b>                      |                  |              |                |              |                             |                      |                        |            |                                                |                   |                  |            |
| 1<br>Cappellino 2012                                                                                     | randomised trial | very serious | not assessable | not serious  | very serious <sup>a,b</sup> | none                 | 7                      | 7          | SMD 0.73 lower<br>(1.82 lower to 0.37 higher)  |                   | ⊕○○○<br>Very low | CRITICAL   |
| <b>PROM - SF-36 Vitality (better indicated by higher values) – 6 months post-op</b>                      |                  |              |                |              |                             |                      |                        |            |                                                |                   |                  |            |
| 1<br>Cappellino 2012                                                                                     | randomised trial | very serious | not assessable | not serious  | very serious <sup>a,b</sup> | none                 | 7                      | 7          | SMD 0.26 lower<br>(1.32 lower to 0.79 higher)  |                   | ⊕○○○<br>Very low | CRITICAL   |
| <b>PROM - SF-36 Social activity (better indicated by higher values) – 3 months post-op</b>               |                  |              |                |              |                             |                      |                        |            |                                                |                   |                  |            |
| 1<br>Cappellino 2012                                                                                     | randomised trial | very serious | not assessable | not serious  | very serious <sup>a,b</sup> | none                 | 7                      | 7          | SMD 0.2 higher<br>(0.85 lower to 1.26 higher)  |                   | ⊕○○○<br>Very low | CRITICAL   |
| <b>PROM - SF-36 Social activity (better indicated by higher values) – 6 months post-op</b>               |                  |              |                |              |                             |                      |                        |            |                                                |                   |                  |            |
| 1<br>Cappellino 2012                                                                                     | randomised trial | very serious | not assessable | not serious  | very serious <sup>a,b</sup> | none                 | 7                      | 7          | SMD 0.48 higher<br>(0.59 lower to 1.55 higher) |                   | ⊕○○○<br>Very low | CRITICAL   |
| <b>PROM - SF-36 Emotional role (better indicated by higher values) – 3 months post-op</b>                |                  |              |                |              |                             |                      |                        |            |                                                |                   |                  |            |
| 1<br>Cappellino 2012                                                                                     | randomised trial | very serious | not assessable | not serious  | very serious <sup>a,b</sup> | none                 | 7                      | 7          | SMD 0.48 higher<br>(0.59 lower to 1.55 higher) |                   | ⊕○○○<br>Very low | CRITICAL   |
| <b>PROM - SF-36 Emotional role (better indicated by higher values) – 6 months post-op</b>                |                  |              |                |              |                             |                      |                        |            |                                                |                   |                  |            |
| 1<br>Cappellino 2012                                                                                     | randomised trial | very serious | not assessable | not serious  | very serious <sup>a,b</sup> | none                 | 7                      | 7          | SMD 0<br>(1.05 lower to 1.05 higher)           |                   | ⊕○○○<br>Very low | CRITICAL   |
| <b>PROM - SF-36 Mental health (better indicated by higher values) – 3 months post-op</b>                 |                  |              |                |              |                             |                      |                        |            |                                                |                   |                  |            |
| 1<br>Cappellino 2012                                                                                     | randomised trial | very serious | not assessable | not serious  | very serious <sup>a,b</sup> | none                 | 7                      | 7          | SMD 0.21 lower<br>(1.27 lower to 0.84 higher)  |                   | ⊕○○○<br>Very low | CRITICAL   |
| <b>PROM - SF-36 Mental health (better indicated by higher values) – 6 months post-op</b>                 |                  |              |                |              |                             |                      |                        |            |                                                |                   |                  |            |
| 1<br>Cappellino 2012                                                                                     | randomised trial | very serious | not assessable | not serious  | very serious <sup>a,b</sup> | none                 | 7                      | 7          | SMD 0.13 higher<br>(0.92 lower to 1.18 higher) |                   | ⊕○○○<br>Very low | CRITICAL   |
| <b>PROM - Lysholm (better indicated by higher values) post intervention; duration program is 6 weeks</b> |                  |              |                |              |                             |                      |                        |            |                                                |                   |                  |            |
| 1<br>Cho 2013                                                                                            | randomised trial | very serious | not assessable | not serious  | very serious <sup>a,b</sup> | none                 | 14                     | 14         | SMD 0.08 lower<br>(0.82 lower to 0.66 higher)  |                   | ⊕○○○<br>Very low | CRITICAL   |
| <b>PROM - IKDC (better indicated by higher values) – 15 weeks post-op</b>                                |                  |              |                |              |                             |                      |                        |            |                                                |                   |                  |            |
| 1<br>Hajouj 2021                                                                                         | randomised trial | very serious | not assessable | not serious  | very serious <sup>a,b</sup> | none                 | 15                     | 15         | SMD 1.65 higher<br>(0.81 higher to 2.5 higher) |                   | ⊕○○○<br>Very low | CRITICAL   |
| <b>Functional activities</b>                                                                             |                  |              |                |              |                             |                      |                        |            |                                                |                   |                  |            |
| 3                                                                                                        |                  |              |                |              |                             |                      |                        |            |                                                |                   |                  |            |

| Certainty assessment                                                                                      |                  |              |                |              |                             |                      | No of patients         |            | Effect                                         |                   | Certainty        | Importance |
|-----------------------------------------------------------------------------------------------------------|------------------|--------------|----------------|--------------|-----------------------------|----------------------|------------------------|------------|------------------------------------------------|-------------------|------------------|------------|
| No of studies                                                                                             | Study design     | Risk of bias | Inconsistency  | Indirectness | Imprecision                 | Other considerations | Motor control training | Usual care | Relative (95% CI)                              | Absolute (95% CI) |                  |            |
| <b>Functional - Walking Speed (better indicated by higher values) – 3 months post-op</b>                  |                  |              |                |              |                             |                      |                        |            |                                                |                   |                  |            |
| 1 Cappellino 2012                                                                                         | randomised trial | very serious | not assessable | not serious  | very serious <sup>a,b</sup> | none                 | 7                      | 7          | SMD 0.41 lower<br>(1.47 lower to 0.65 higher)  |                   | ⊕○○○<br>Very low | IMPORTANT  |
| <b>Functional - Stride length (better indicated by higher values) – 3 months post-op</b>                  |                  |              |                |              |                             |                      |                        |            |                                                |                   |                  |            |
| 1 Cappellino 2012                                                                                         | randomised trial | very serious | not assessable | not serious  | very serious <sup>a,b</sup> | none                 | 7                      | 7          | SMD 0.09 higher<br>(0.96 lower to 1.13 higher) |                   | ⊕○○○<br>Very low | IMPORTANT  |
| <b>Functional - Cadence (strides/min) (better indicated by higher values) – 3 months post-op</b>          |                  |              |                |              |                             |                      |                        |            |                                                |                   |                  |            |
| 1 Cappellino 2012                                                                                         | randomised trial | very serious | not assessable | not serious  | very serious <sup>a,b</sup> | none                 | 7                      | 7          | SMD 1.14 lower<br>(2.3 lower to 0.02 higher)   |                   | ⊕○○○<br>Very low | IMPORTANT  |
| <b>Functional - Step Width (better indicated by lower values) – 3 months post-op</b>                      |                  |              |                |              |                             |                      |                        |            |                                                |                   |                  |            |
| 1 Cappellino 2012                                                                                         | randomised trial | very serious | not assessable | not serious  | very serious <sup>a,b</sup> | none                 | 7                      | 7          | SMD 0.34 higher<br>(0.72 lower to 1.4 higher)  |                   | ⊕○○○<br>Very low | IMPORTANT  |
| <b>Functional - Walking Speed (better indicated by higher values) – 6 months post-op</b>                  |                  |              |                |              |                             |                      |                        |            |                                                |                   |                  |            |
| 1 Cappellino 2012                                                                                         | randomised trial | very serious | not assessable | not serious  | very serious <sup>a,b</sup> | none                 | 7                      | 7          | SMD 0.66 lower<br>(1.75 lower to 0.42 higher)  |                   | ⊕○○○<br>Very low | IMPORTANT  |
| <b>Functional - Stride length (better indicated by higher values) – 6 months post-op</b>                  |                  |              |                |              |                             |                      |                        |            |                                                |                   |                  |            |
| 1 Cappellino 2012                                                                                         | randomised trial | very serious | not assessable | not serious  | very serious <sup>a,b</sup> | none                 | 7                      | 7          | SMD 0.1 higher<br>(0.95 lower to 1.14 higher)  |                   | ⊕○○○<br>Very low | IMPORTANT  |
| <b>Functional - Cadence (strides/min) (better indicated by higher values) – 6 months post-op</b>          |                  |              |                |              |                             |                      |                        |            |                                                |                   |                  |            |
| 1 Cappellino 2012                                                                                         | randomised trial | very serious | not assessable | not serious  | very serious <sup>a,b</sup> | none                 | 7                      | 7          | SMD 2.39 lower<br>(3.87 lower to 0.91 lower)   |                   | ⊕○○○<br>Very low | IMPORTANT  |
| <b>Functional - Step Width (better indicated by lower values) – 6 months post-op</b>                      |                  |              |                |              |                             |                      |                        |            |                                                |                   |                  |            |
| 1 Cappellino 2012                                                                                         | randomised trial | very serious | not assessable | not serious  | very serious <sup>a,b</sup> | none                 | 7                      | 7          | SMD 1.01 lower<br>(2.14 lower to 0.13 higher)  |                   | ⊕○○○<br>Very low | IMPORTANT  |
| <b>Functional - one leg vertical jump height (better indicated by higher values) – 6 months post-op</b>   |                  |              |                |              |                             |                      |                        |            |                                                |                   |                  |            |
| 1 Bartels 2016                                                                                            | randomised trial | very serious | not assessable | not serious  | very serious <sup>a,b</sup> | none                 | 28                     | 22         | SMD 0.11 higher<br>(0.44 lower to 0.67 higher) |                   | ⊕○○○<br>Very low | IMPORTANT  |
| <b>Functional - Single leg hop for distance (cm) (better indicated by higher values), 2 years post-op</b> |                  |              |                |              |                             |                      |                        |            |                                                |                   |                  |            |
| 1 Kaya 2019                                                                                               | randomised trial | very serious | not assessable | not serious  | very serious <sup>a,b</sup> | none                 | 17                     | 15         | SMD 0.18 lower<br>(0.87 lower to 0.52 higher)  |                   | ⊕○○○<br>Very low | IMPORTANT  |
| <b>Strength</b>                                                                                           |                  |              |                |              |                             |                      |                        |            |                                                |                   |                  |            |
| 2                                                                                                         |                  |              |                |              |                             |                      |                        |            |                                                |                   |                  |            |
| <b>Strength - Quadriceps CON 60°/s LSI% (better indicated by higher values) – 3 months post-op</b>        |                  |              |                |              |                             |                      |                        |            |                                                |                   |                  |            |
| 1 Baltaci 2013                                                                                            | randomised trial | serious      | not assessable | not serious  | very serious <sup>a,b</sup> | none                 | 15                     | 15         | SMD 0.04 lower<br>(0.76 lower to 0.68 higher)  |                   | ⊕○○○<br>Very low | CRITICAL   |
| <b>Strength - Quadriceps CON 180°/s LSI% (better indicated by higher values) – 3 months post-op</b>       |                  |              |                |              |                             |                      |                        |            |                                                |                   |                  |            |
| 1 Baltaci 2013                                                                                            | randomised trial | serious      | not assessable | not serious  | very serious <sup>a,b</sup> | none                 | 15                     | 15         | SMD 0.68 higher<br>(0.06 lower to 1.42 higher) |                   | ⊕○○○<br>Very low | CRITICAL   |
| <b>Strength - Quadriceps CON 30°/s (better indicated by higher values), 2 years post-op</b>               |                  |              |                |              |                             |                      |                        |            |                                                |                   |                  |            |
| 1 Kaya 2019                                                                                               | randomised trial | very serious | not assessable | not serious  | very serious <sup>a,b</sup> | none                 | 17                     | 15         | SMD 0<br>(0.69 lower to 0.7 higher)            |                   | ⊕○○○<br>Very low | CRITICAL   |
| <b>Strength - Quadriceps CON 60°/s (better indicated by higher values), 2 years post-op</b>               |                  |              |                |              |                             |                      |                        |            |                                                |                   |                  |            |
| 1 Kaya 2019                                                                                               | randomised trial | very serious | not assessable | not serious  | very serious <sup>a,b</sup> | none                 | 17                     | 15         | SMD 0.22 higher<br>(0.48 lower to 0.92 higher) |                   | ⊕○○○<br>Very low | CRITICAL   |
| <b>Strength - Quadriceps CON 180°/s (better indicated by higher values), 2 years post-op</b>              |                  |              |                |              |                             |                      |                        |            |                                                |                   |                  |            |

| Certainty assessment                                                                                                     |                                 |                   |               |                                     |             |                             | No of patients         |            | Effect            |                                                | Certainty        | Importance |
|--------------------------------------------------------------------------------------------------------------------------|---------------------------------|-------------------|---------------|-------------------------------------|-------------|-----------------------------|------------------------|------------|-------------------|------------------------------------------------|------------------|------------|
| No of studies                                                                                                            | Study design                    | Risk of bias      | Inconsistency | Indirectness                        | Imprecision | Other considerations        | Motor control training | Usual care | Relative (95% CI) | Absolute (95% CI)                              |                  |            |
| 1                                                                                                                        | Kaya 2019                       | randomised trial  | very serious  | not assessable                      | not serious | very serious <sup>a,b</sup> | none                   | 17         | 15                | SMD 0.18 lower<br>(0.88 lower to 0.52 higher)  | ⊕○○○<br>Very low | CRITICAL   |
| <b>Strength - Quadriceps CON 330°/s (better indicated by higher values), 2 years post-op</b>                             |                                 |                   |               |                                     |             |                             |                        |            |                   |                                                |                  |            |
| 1                                                                                                                        | Kaya 2019                       | randomised trial  | very serious  | not assessable                      | not serious | very serious <sup>a,b</sup> | none                   | 17         | 15                | SMD 0.3 lower<br>(1 lower to 0.4 higher)       | ⊕○○○<br>Very low | CRITICAL   |
| <b>Strength - Hamstring CON 60°/s LSI% (better indicated by higher values) – 3 months post-op</b>                        |                                 |                   |               |                                     |             |                             |                        |            |                   |                                                |                  |            |
| 1                                                                                                                        | Baltaci 2013                    | randomised trial  | serious       | not assessable                      | not serious | very serious <sup>a,b</sup> | none                   | 15         | 15                | SMD 0.56 higher<br>(0.17 lower to 1.29 higher) | ⊕○○○<br>Very low | CRITICAL   |
| <b>Strength - Hamstring CON 180°/s LSI% (better indicated by higher values) – 3 months post-op</b>                       |                                 |                   |               |                                     |             |                             |                        |            |                   |                                                |                  |            |
| 1                                                                                                                        | Baltaci 2013                    | randomised trial  | serious       | not assessable                      | not serious | very serious <sup>a,b</sup> | none                   | 15         | 15                | SMD 1.1 lower<br>(1.87 lower to 0.32 lower)    | ⊕○○○<br>Very low | CRITICAL   |
| <b>Strength - Hamstring CON 30°/s (better indicated by higher values) – 2 years post-op</b>                              |                                 |                   |               |                                     |             |                             |                        |            |                   |                                                |                  |            |
| 1                                                                                                                        | Kaya 2019                       | randomised trial  | very serious  | not assessable                      | not serious | very serious <sup>a,b</sup> | none                   | 17         | 15                | SMD 0.08 higher<br>(0.61 lower to 0.78 higher) | ⊕○○○<br>Very low | CRITICAL   |
| <b>Strength - Hamstring CON 60°/s (better indicated by higher values) – 2 years post-op</b>                              |                                 |                   |               |                                     |             |                             |                        |            |                   |                                                |                  |            |
| 1                                                                                                                        | Kaya 2019                       | randomised trial  | very serious  | not assessable                      | not serious | very serious <sup>a,b</sup> | none                   | 17         | 15                | SMD 0.3 higher<br>(0.4 lower to 0.99 higher)   | ⊕○○○<br>Very low | CRITICAL   |
| <b>Strength - Hamstring CON 180°/s (better indicated by higher values) – 2 years post-op</b>                             |                                 |                   |               |                                     |             |                             |                        |            |                   |                                                |                  |            |
| 1                                                                                                                        | Kaya 2019                       | randomised trial  | very serious  | not assessable                      | not serious | very serious <sup>a,b</sup> | none                   | 17         | 15                | SMD 0.01 higher<br>(0.68 lower to 0.71 higher) | ⊕○○○<br>Very low | CRITICAL   |
| <b>Strength - Hamstring CON 330°/s (better indicated by higher values) – 2 years post-op</b>                             |                                 |                   |               |                                     |             |                             |                        |            |                   |                                                |                  |            |
| 1                                                                                                                        | Kaya 2019                       | randomised trial  | very serious  | not assessable                      | not serious | very serious <sup>a,b</sup> | none                   | 17         | 15                | SMD 0.17 lower<br>(0.87 lower to 0.52 higher)  | ⊕○○○<br>Very low | CRITICAL   |
| <b>Atrophy</b>                                                                                                           |                                 |                   |               |                                     |             |                             |                        |            |                   |                                                |                  |            |
| 2                                                                                                                        |                                 |                   |               |                                     |             |                             |                        |            |                   |                                                |                  |            |
| <b>Atrophy - thigh circumference difference between limbs (cm) (better indicated by lower values) – 3 months post-op</b> |                                 |                   |               |                                     |             |                             |                        |            |                   |                                                |                  |            |
| 1                                                                                                                        | Cappellino 2012                 | randomised trial  | very serious  | not assessable                      | not serious | very serious <sup>c</sup>   | none                   | 7          | 7                 | SMD 0.41 lower<br>(0.65 lower to 1.48 higher)  | ⊕○○○<br>Very low | CRITICAL   |
| <b>Atrophy - thigh circumference difference between limbs (cm) (better indicated by lower values) – 6 months post-op</b> |                                 |                   |               |                                     |             |                             |                        |            |                   |                                                |                  |            |
| 2                                                                                                                        | Cappellino 2012<br>Bartels 2016 | randomised trials | very serious  | not serious<br>I <sup>2</sup> =36%  | not serious | very serious <sup>a,b</sup> | none                   | 35         | 29                | SMD 0.51 lower<br>(1.22 lower to 0.19 higher)  | ⊕○○○<br>Very low | CRITICAL   |
| <b>Atrophy – calf circumference 10cm below knee (cm) (better indicated by lower values) – 6 months post-op</b>           |                                 |                   |               |                                     |             |                             |                        |            |                   |                                                |                  |            |
| 1                                                                                                                        | Bartels 2016                    | randomised trial  | very serious  | not assessable                      | not serious | very serious <sup>a,b</sup> | none                   | 28         | 22                | SMD 0.52 lower<br>(1.09 lower to 0.04 higher)  | ⊕○○○<br>Very low | CRITICAL   |
| <b>Pain</b>                                                                                                              |                                 |                   |               |                                     |             |                             |                        |            |                   |                                                |                  |            |
| 2                                                                                                                        |                                 |                   |               |                                     |             |                             |                        |            |                   |                                                |                  |            |
| <b>Pain - pain (VAS) (better indicated by lower values) – 3-4 months post-op</b>                                         |                                 |                   |               |                                     |             |                             |                        |            |                   |                                                |                  |            |
| 2                                                                                                                        | Cappellino 2012<br>Hajouj 2021  | randomised trials | very serious  | very serious<br>I <sup>2</sup> =82% | not serious | very serious <sup>a,b</sup> | none                   | 22         | 22                | SMD 0.33 lower<br>(1.93 lower to 1.27 higher)  | ⊕○○○<br>Very low | CRITICAL   |
| <b>Pain - pain (VAS) (better indicated by lower values) – 6 months post-op</b>                                           |                                 |                   |               |                                     |             |                             |                        |            |                   |                                                |                  |            |
| 1                                                                                                                        | Cappellino 2012                 | randomised trial  | very serious  | not assessable                      | not serious | very serious <sup>a,b</sup> | none                   | 7          | 7                 | SMD 0.3 lower<br>(1.36 lower to 0.75 higher)   | ⊕○○○<br>Very low | CRITICAL   |
| <b>Range of motion (ROM)</b>                                                                                             |                                 |                   |               |                                     |             |                             |                        |            |                   |                                                |                  |            |
| 2                                                                                                                        |                                 |                   |               |                                     |             |                             |                        |            |                   |                                                |                  |            |
| <b>ROM - flexion (better indicated by higher values) – 3 months post-op</b>                                              |                                 |                   |               |                                     |             |                             |                        |            |                   |                                                |                  |            |

| Certainty assessment                                                                                                                                             |                   |              |                                    |              |                             |                      | No of patients         |            | Effect                                                                                                                                      |                   | Certainty        | Importance |
|------------------------------------------------------------------------------------------------------------------------------------------------------------------|-------------------|--------------|------------------------------------|--------------|-----------------------------|----------------------|------------------------|------------|---------------------------------------------------------------------------------------------------------------------------------------------|-------------------|------------------|------------|
| No of studies                                                                                                                                                    | Study design      | Risk of bias | Inconsistency                      | Indirectness | Imprecision                 | Other considerations | Motor control training | Usual care | Relative (95% CI)                                                                                                                           | Absolute (95% CI) |                  |            |
| 1<br>Cappellino 2012                                                                                                                                             | randomised trial  | very serious | not assessable                     | not serious  | very serious <sup>a,b</sup> | none                 | 7                      | 7          | SMD 1.26 higher<br>(0.07 higher to 2.44 higher)                                                                                             |                   | ⊕○○○<br>Very low | IMPORTANT  |
| <b>ROM - flexion (better indicated by higher values) – 6 months post-op</b>                                                                                      |                   |              |                                    |              |                             |                      |                        |            |                                                                                                                                             |                   |                  |            |
| 2<br>Cappellino 2012<br>Bartels 2016                                                                                                                             | randomised trials | very serious | not serious<br>I <sup>2</sup> =31% | not serious  | very serious <sup>a,b</sup> | none                 | 35                     | 29         | SMD 0.50 higher<br>(0.1 lower to 1.2 higher)                                                                                                |                   | ⊕○○○<br>Very low | IMPORTANT  |
| <b>ROM - extension (better indicated by lower values) – 3 months post-op</b>                                                                                     |                   |              |                                    |              |                             |                      |                        |            |                                                                                                                                             |                   |                  |            |
| 1<br>Cappellino 2012                                                                                                                                             | randomised trial  | very serious | not assessable                     | not serious  | very serious <sup>a,b</sup> | none                 | 7                      | 7          | SMD 0.66 lower<br>(1.75 lower to 0.42 higher)                                                                                               |                   | ⊕○○○<br>Very low | IMPORTANT  |
| <b>ROM - extension (better indicated by lower values) – 6 months post-op</b>                                                                                     |                   |              |                                    |              |                             |                      |                        |            |                                                                                                                                             |                   |                  |            |
| 2<br>Cappellino 2012<br>Bartels 2016                                                                                                                             | randomised trials | very serious | not serious<br>I <sup>2</sup> =0%  | not serious  | serious <sup>a</sup>        | none                 | 35                     | 29         | SMD 0.37 lower<br>(0.87 lower to 0.13 higher)                                                                                               |                   | ⊕○○○<br>Very low | IMPORTANT  |
| <b>Swelling</b>                                                                                                                                                  |                   |              |                                    |              |                             |                      |                        |            |                                                                                                                                             |                   |                  |            |
| 1                                                                                                                                                                |                   |              |                                    |              |                             |                      |                        |            |                                                                                                                                             |                   |                  |            |
| <b>Swelling - mid-patella knee joint circumference (cm) using measuring tape; difference between limbs (better indicated by lower values) – 3 months post-op</b> |                   |              |                                    |              |                             |                      |                        |            |                                                                                                                                             |                   |                  |            |
| 1<br>Cappellino 2012                                                                                                                                             | randomised trial  | very serious | not assessable                     | not serious  | very serious <sup>a,b</sup> | none                 | 7                      | 7          | SMD 1.85 lower<br>(3.18 lower to 0.53 lower)                                                                                                |                   | ⊕○○○<br>Very low | IMPORTANT  |
| <b>Swelling - mid-patella knee joint circumference (cm) using measuring tape; difference between limbs (better indicated by lower values) – 6 months post-op</b> |                   |              |                                    |              |                             |                      |                        |            |                                                                                                                                             |                   |                  |            |
| 1<br>Cappellino 2012                                                                                                                                             | randomised trial  | very serious | not assessable                     | not serious  | very serious <sup>a,b</sup> | none                 | 7                      | 7          | SMD 0.37 lower<br>(1.43 lower to 0.69 higher)                                                                                               |                   | ⊕○○○<br>Very low | IMPORTANT  |
| <b>Laxity (pivot shift, anterior drawer, and valgus stress tests)</b>                                                                                            |                   |              |                                    |              |                             |                      |                        |            |                                                                                                                                             |                   |                  |            |
| Kaya 2019                                                                                                                                                        | randomised trial  | very serious | not assessable                     | not serious  | very serious <sup>a,c</sup> | none                 | 17                     | 15         | No significant differences were reported                                                                                                    |                   | ⊕○○○<br>Very low | CRITICAL   |
| <b>Adverse events</b>                                                                                                                                            |                   |              |                                    |              |                             |                      |                        |            |                                                                                                                                             |                   |                  |            |
| Cappellino 2012                                                                                                                                                  |                   |              |                                    |              |                             |                      |                        |            | "1 subject of TG was unable to return to amateur sport previously carried out, while three subjects of CG could not return to practice it." |                   |                  | CRITICAL   |
| Cho 2013                                                                                                                                                         |                   |              |                                    |              |                             |                      |                        |            | None reported                                                                                                                               |                   |                  | CRITICAL   |
| Kaya 2019                                                                                                                                                        |                   |              |                                    |              |                             |                      |                        |            | None reported                                                                                                                               |                   |                  | CRITICAL   |
| Shen 2021                                                                                                                                                        |                   |              |                                    |              |                             |                      |                        |            | None reported                                                                                                                               |                   |                  | CRITICAL   |
| Hajouj 2021                                                                                                                                                      |                   |              |                                    |              |                             |                      |                        |            | None reported                                                                                                                               |                   |                  | CRITICAL   |
| Baltaci 2013                                                                                                                                                     |                   |              |                                    |              |                             |                      |                        |            | None reported                                                                                                                               |                   |                  | CRITICAL   |
| Bartels 2016                                                                                                                                                     |                   |              |                                    |              |                             |                      |                        |            | None reported                                                                                                                               |                   |                  | CRITICAL   |

CI: confidence interval; SMD: standardised mean difference

- a. Total participants <800
- b. 95% CI of an SMD extends > 0.5 points in either direction

## Motor control training versus strength training in rehabilitation after ACLR

Bibliography: Liu-ambrose 2003, Cooper 2005

| Certainty assessment                                                                                                     |                  |              |                |              |                             |                      | No of patients         |                   | Effect                                          |                   | Certainty        | Importance |
|--------------------------------------------------------------------------------------------------------------------------|------------------|--------------|----------------|--------------|-----------------------------|----------------------|------------------------|-------------------|-------------------------------------------------|-------------------|------------------|------------|
| No of studies                                                                                                            | Study design     | Risk of bias | Inconsistency  | Indirectness | Imprecision                 | Other considerations | Motor control training | Strength training | Relative (95% CI)                               | Absolute (95% CI) |                  |            |
| <b>Strength</b>                                                                                                          |                  |              |                |              |                             |                      |                        |                   |                                                 |                   |                  |            |
| 1                                                                                                                        |                  |              |                |              |                             |                      |                        |                   |                                                 |                   |                  |            |
| <b>Strength - Quadriceps CON 45°/s (better indicated by higher values) – 1 year post-op</b>                              |                  |              |                |              |                             |                      |                        |                   |                                                 |                   |                  |            |
| 1<br>Liu-ambrose 2003                                                                                                    | randomised trial | very serious | not assessable | not serious  | very serious <sup>a,b</sup> | none                 | 5                      | 5                 | SMD 1.56 higher<br>(0.04 higher to 3.08 higher) |                   | ⊕○○○<br>Very low | CRITICAL   |
| <b>Strength - Quadriceps ECC 45°/s (better indicated by higher values) – 1 year post-op</b>                              |                  |              |                |              |                             |                      |                        |                   |                                                 |                   |                  |            |
| 1<br>Liu-ambrose 2003                                                                                                    | randomised trial | very serious | not assessable | not serious  | very serious <sup>a,b</sup> | none                 | 5                      | 5                 | SMD 0.91 higher<br>(0.43 lower to 2.25 higher)  |                   | ⊕○○○<br>Very low | CRITICAL   |
| <b>Strength - Hamstring CON 45°/s (better indicated by higher values) – 1 year post-op</b>                               |                  |              |                |              |                             |                      |                        |                   |                                                 |                   |                  |            |
| 1<br>Liu-ambrose 2003                                                                                                    | randomised trial | very serious | not assessable | not serious  | very serious <sup>a,b</sup> | none                 | 5                      | 5                 | SMD 0.35 higher<br>(0.91 lower to 1.6 higher)   |                   | ⊕○○○<br>Very low | CRITICAL   |
| <b>Strength - Hamstring ECC 45°/s (better indicated by higher values) – 1 year post-op</b>                               |                  |              |                |              |                             |                      |                        |                   |                                                 |                   |                  |            |
| 1<br>Liu-ambrose 2003                                                                                                    | randomised trial | very serious | not assessable | not serious  | very serious <sup>a,b</sup> | none                 | 5                      | 5                 | SMD 0.99 higher<br>(0.37 lower to 2.35 higher)  |                   | ⊕○○○<br>Very low | CRITICAL   |
| <b>Strength - Hamstring Peak torque time (better indicated by lower values) – 1 year post-op</b>                         |                  |              |                |              |                             |                      |                        |                   |                                                 |                   |                  |            |
| 1<br>Liu-ambrose 2003                                                                                                    | randomised trial | very serious | not assessable | not serious  | very serious <sup>a,b</sup> | none                 | 5                      | 5                 | SMD 0.46 lower<br>(1.73 lower to 0.8 higher)    |                   | ⊕○○○<br>Very low | CRITICAL   |
| <b>Patient reported outcome measures (PROM)</b>                                                                          |                  |              |                |              |                             |                      |                        |                   |                                                 |                   |                  |            |
| 2                                                                                                                        |                  |              |                |              |                             |                      |                        |                   |                                                 |                   |                  |            |
| <b>PROM – Patient Specific Functional Scale (PSFS) activity 1 (better indicated by higher values) – 3 months post-op</b> |                  |              |                |              |                             |                      |                        |                   |                                                 |                   |                  |            |
| 1<br>Cooper 2005                                                                                                         | randomised trial | serious      | not assessable | not serious  | very serious <sup>a,b</sup> | none                 | 14                     | 15                | SMD 0.36 higher<br>(0.38 lower to 1.09 higher)  |                   | ⊕○○○<br>Very low | CRITICAL   |
| <b>PROM – Patient Specific Functional Scale (PSFS) activity 2 (better indicated by higher values) – 3 months post-op</b> |                  |              |                |              |                             |                      |                        |                   |                                                 |                   |                  |            |
| 1<br>Cooper 2005                                                                                                         | randomised trial | serious      | not assessable | not serious  | very serious <sup>a,b</sup> | none                 | 14                     | 15                | SMD 0.1 lower<br>(0.83 lower to 0.63 higher)    |                   | ⊕○○○<br>Very low | CRITICAL   |
| <b>PROM – Patient Specific Functional Scale (PSFS) activity 3 (better indicated by higher values) – 3 months post-op</b> |                  |              |                |              |                             |                      |                        |                   |                                                 |                   |                  |            |
| 1<br>Cooper 2005                                                                                                         | randomised trial | serious      | not assessable | not serious  | very serious <sup>a,b</sup> | none                 | 14                     | 15                | SMD 0.18 lower<br>(0.91 lower to 0.55 higher)   |                   | ⊕○○○<br>Very low | CRITICAL   |
| <b>PROM - Cincinnati knee rating scale - pain (better indicated by higher values) – 3 months post-op</b>                 |                  |              |                |              |                             |                      |                        |                   |                                                 |                   |                  |            |
| 1<br>Cooper 2005                                                                                                         | randomised trial | serious      | not assessable | not serious  | very serious <sup>a,b</sup> | none                 | 14                     | 15                | SMD 0.28 higher<br>(0.45 lower to 1.01 higher)  |                   | ⊕○○○<br>Very low | CRITICAL   |
| <b>PROM - Cincinnati knee rating scale - swelling (better indicated by higher values) – 3 months post-op</b>             |                  |              |                |              |                             |                      |                        |                   |                                                 |                   |                  |            |
| 1<br>Cooper 2005                                                                                                         | randomised trial | serious      | not assessable | not serious  | very serious <sup>a,b</sup> | none                 | 14                     | 15                | SMD 0.24 lower<br>(0.97 lower to 0.49 higher)   |                   | ⊕○○○<br>Very low | CRITICAL   |
| <b>PROM - Cincinnati knee rating scale - overall condition (better indicated by higher values) – 3 months post-op</b>    |                  |              |                |              |                             |                      |                        |                   |                                                 |                   |                  |            |
| 1<br>Cooper 2005                                                                                                         | randomised trial | serious      | not assessable | not serious  | very serious <sup>a,b</sup> | none                 | 14                     | 15                | SMD 0.29 lower<br>(1.02 lower to 0.45 higher)   |                   | ⊕○○○<br>Very low | CRITICAL   |
| <b>PROM - Cincinnati knee rating scale - walking (better indicated by higher values) – 3 months post-op</b>              |                  |              |                |              |                             |                      |                        |                   |                                                 |                   |                  |            |

| Certainty assessment                                                                                                   |                     |              |                |              |                             |                      | No of patients         |                   | Effect                                         |                   | Certainty        | Importance |
|------------------------------------------------------------------------------------------------------------------------|---------------------|--------------|----------------|--------------|-----------------------------|----------------------|------------------------|-------------------|------------------------------------------------|-------------------|------------------|------------|
| No of studies                                                                                                          | Study design        | Risk of bias | Inconsistency  | Indirectness | Imprecision                 | Other considerations | Motor control training | Strength training | Relative (95% CI)                              | Absolute (95% CI) |                  |            |
| 1<br>Cooper<br>2005                                                                                                    | randomised<br>trial | serious      | not assessable | not serious  | very serious <sup>a,b</sup> | none                 | 14                     | 15                | SMD 0<br>(0.73 lower to 0.73 higher)           |                   | ⊕○○○<br>Very low | CRITICAL   |
| <b>PROM - Cincinnati knee rating scale - stairs (better indicated by higher values) – 3 months post-op</b>             |                     |              |                |              |                             |                      |                        |                   |                                                |                   |                  |            |
| 1<br>Cooper<br>2005                                                                                                    | randomised<br>trial | serious      | not assessable | not serious  | very serious <sup>a,b</sup> | none                 | 14                     | 15                | SMD 0<br>(0.73 lower to 0.73 higher)           |                   | ⊕○○○<br>Very low | CRITICAL   |
| <b>PROM - Cincinnati knee rating scale - squatting/kneeling (better indicated by higher values) – 3 months post-op</b> |                     |              |                |              |                             |                      |                        |                   |                                                |                   |                  |            |
| 1<br>Cooper<br>2005                                                                                                    | randomised<br>trial | serious      | not assessable | not serious  | very serious <sup>a,b</sup> | none                 | 14                     | 15                | SMD 0<br>(0.73 lower to 0.73 higher)           |                   | ⊕○○○<br>Very low | CRITICAL   |
| <b>PROM - Lysholm (better indicated by higher values) – 1 year post-op</b>                                             |                     |              |                |              |                             |                      |                        |                   |                                                |                   |                  |            |
| 1<br>Liu-<br>ambrose<br>2003                                                                                           | randomised<br>trial | very serious | not assessable | not serious  | very serious <sup>a,b</sup> | none                 | 5                      | 5                 | SMD 0.07 higher<br>(1.17 lower to 1.31 higher) |                   | ⊕○○○<br>Very low | CRITICAL   |
| <b>PROM - Tegner (better indicated by higher values) – 1 year post-op</b>                                              |                     |              |                |              |                             |                      |                        |                   |                                                |                   |                  |            |
| 1<br>Liu-<br>ambrose<br>2003                                                                                           | randomised<br>trial | very serious | not assessable | not serious  | very serious <sup>a,b</sup> | none                 | 5                      | 5                 | SMD 0.34 higher<br>(0.91 lower to 1.6 higher)  |                   | ⊕○○○<br>Very low | CRITICAL   |
| <b>Functional activities</b>                                                                                           |                     |              |                |              |                             |                      |                        |                   |                                                |                   |                  |            |
| 2                                                                                                                      |                     |              |                |              |                             |                      |                        |                   |                                                |                   |                  |            |
| <b>Functional - single leg hop for distance (m) (better indicated by higher values) – 3 months post-op</b>             |                     |              |                |              |                             |                      |                        |                   |                                                |                   |                  |            |
| 1<br>Cooper<br>2005                                                                                                    | randomised<br>trial | serious      | not assessable | not serious  | very serious <sup>a,b</sup> | none                 | 14                     | 15                | SMD 0.6 higher<br>(0.15 lower to 1.34 higher)  |                   | ⊕○○○<br>Very low | IMPORTANT  |
| <b>Functional - Triple crossover hop LSI% (better indicated by higher values) – 3 months post-op</b>                   |                     |              |                |              |                             |                      |                        |                   |                                                |                   |                  |            |
| 1<br>Cooper<br>2005                                                                                                    | randomised<br>trial | serious      | not assessable | not serious  | very serious <sup>a,b</sup> | none                 | 14                     | 15                | SMD 0.04 lower<br>(0.77 lower to 0.69 higher)  |                   | ⊕○○○<br>Very low | IMPORTANT  |
| <b>Functional - Timed 6m LSI% (better indicated by higher values) – 3 months post-op</b>                               |                     |              |                |              |                             |                      |                        |                   |                                                |                   |                  |            |
| 1<br>Cooper<br>2005                                                                                                    | randomised<br>trial | serious      | not assessable | not serious  | very serious <sup>a,b</sup> | none                 | 14                     | 15                | SMD 0.3 higher<br>(0.43 lower to 1.04 higher)  |                   | ⊕○○○<br>Very low | IMPORTANT  |
| <b>Functional - single leg hop for distance (m) (better indicated by higher values) – 1 year post-op</b>               |                     |              |                |              |                             |                      |                        |                   |                                                |                   |                  |            |
| 1<br>Liu-<br>ambrose<br>2003                                                                                           | randomised<br>trial | very serious | not assessable | not serious  | very serious <sup>a,b</sup> | none                 | 5                      | 5                 | SMD 0.13 lower<br>(1.37 lower to 1.11 higher)  |                   | ⊕○○○<br>Very low | IMPORTANT  |
| <b>Functional - Timed 6m LSI% (better indicated by higher values) – 1 year post-op</b>                                 |                     |              |                |              |                             |                      |                        |                   |                                                |                   |                  |            |
| 1<br>Liu-<br>ambrose<br>2003                                                                                           | randomised<br>trial | very serious | not assessable | not serious  | very serious <sup>a,b</sup> | none                 | 5                      | 5                 | SMD 0.18 lower<br>(1.43 lower to 1.06 higher)  |                   | ⊕○○○<br>Very low | IMPORTANT  |
| <b>Range of motion (ROM)</b>                                                                                           |                     |              |                |              |                             |                      |                        |                   |                                                |                   |                  |            |
| 1                                                                                                                      |                     |              |                |              |                             |                      |                        |                   |                                                |                   |                  |            |
| <b>ROM - knee flexion (°) (better indicated by higher values) – 3 months post-op</b>                                   |                     |              |                |              |                             |                      |                        |                   |                                                |                   |                  |            |
| 1<br>Cooper<br>2005                                                                                                    | randomised<br>trial | serious      | not assessable | not serious  | very serious <sup>a,b</sup> | none                 | 14                     | 15                | SMD 0.72 higher<br>(0.03 lower to 1.48 higher) |                   | ⊕○○○<br>Very low | IMPORTANT  |
| <b>ROM - knee extension deficit (cm) (better indicated by lower values) – 3 months post-op</b>                         |                     |              |                |              |                             |                      |                        |                   |                                                |                   |                  |            |
| 1<br>Cooper<br>2005                                                                                                    | randomised<br>trial | serious      | not assessable | not serious  | very serious <sup>a,b</sup> | none                 | 14                     | 15                | SMD 0.11 higher<br>(0.61 lower to 0.84 higher) |                   | ⊕○○○<br>Very low | IMPORTANT  |
| <b>Adverse events</b>                                                                                                  |                     |              |                |              |                             |                      |                        |                   |                                                |                   |                  |            |
| Liu-<br>ambrose<br>2003                                                                                                |                     |              |                |              |                             |                      |                        |                   | None reported                                  |                   |                  | CRITICAL   |

| Certainty assessment |              |              |               |              |             |                      | No of patients         |                   | Effect            |                   | Certainty | Importance |
|----------------------|--------------|--------------|---------------|--------------|-------------|----------------------|------------------------|-------------------|-------------------|-------------------|-----------|------------|
| No of studies        | Study design | Risk of bias | Inconsistency | Indirectness | Imprecision | Other considerations | Motor control training | Strength training | Relative (95% CI) | Absolute (95% CI) |           |            |
| Cooper 2005          |              |              |               |              |             |                      |                        |                   | None reported     |                   |           | CRITICAL   |

CI: confidence interval; SMD: standardised mean difference

- a. Total participants <800
- b. 95% CI of an SMD extends > 0.5 points in either direction

## Plyometric and agility training versus usual care in rehabilitation after ACLR

Bibliography: Risberg 2007, Risberg 2009, Souissi 2011, Kasmi 2021

| Certainty assessment                                                                                                                              |              |                  |               |                |             |                      | No of patients                |            | Effect            |                                                | Certainty   | Importance |
|---------------------------------------------------------------------------------------------------------------------------------------------------|--------------|------------------|---------------|----------------|-------------|----------------------|-------------------------------|------------|-------------------|------------------------------------------------|-------------|------------|
| No of studies                                                                                                                                     | Study design | Risk of bias     | Inconsistency | Indirectness   | Imprecision | Other considerations | Plyometric + agility training | Usual care | Relative (95% CI) | Absolute (95% CI)                              |             |            |
| <b>Strength</b>                                                                                                                                   |              |                  |               |                |             |                      |                               |            |                   |                                                |             |            |
| 1                                                                                                                                                 |              |                  |               |                |             |                      |                               |            |                   |                                                |             |            |
| <b>Strength - Quadriceps work CON 60°/s (better indicated by higher values) – 6 months post-op</b>                                                |              |                  |               |                |             |                      |                               |            |                   |                                                |             |            |
| 1                                                                                                                                                 | Risberg 2009 | randomised trial | serious       | not assessable | not serious | serious <sup>a</sup> | none                          | 34         | 31                | SMD 0.17 higher<br>(0.32 lower to 0.65 higher) | ⊕⊕○○<br>Low | CRITICAL   |
| <b>Strength - Quadriceps work CON 240°/s (better indicated by higher values) – 6 months post-op</b>                                               |              |                  |               |                |             |                      |                               |            |                   |                                                |             |            |
| 1                                                                                                                                                 | Risberg 2009 | randomised trial | serious       | not assessable | not serious | serious <sup>a</sup> | none                          | 34         | 31                | SMD 0.06 higher<br>(0.43 lower to 0.55 higher) | ⊕⊕○○<br>Low | CRITICAL   |
| <b>Strength - Quadriceps work CON 60°/s (better indicated by higher values) – 1 year post-op</b>                                                  |              |                  |               |                |             |                      |                               |            |                   |                                                |             |            |
| 1                                                                                                                                                 | Risberg 2009 | randomised trial | serious       | not assessable | not serious | serious <sup>a</sup> | none                          | 36         | 33                | SMD 0.09 higher<br>(0.38 lower to 0.56 higher) | ⊕⊕○○<br>Low | CRITICAL   |
| <b>Strength - Quadriceps work CON 240°/s (better indicated by higher values) – 1 year post-op</b>                                                 |              |                  |               |                |             |                      |                               |            |                   |                                                |             |            |
| 1                                                                                                                                                 | Risberg 2009 | randomised trial | serious       | not assessable | not serious | serious <sup>a</sup> | none                          | 36         | 33                | SMD 0.12 higher<br>(0.35 lower to 0.59 higher) | ⊕⊕○○<br>Low | CRITICAL   |
| <b>Strength - Quadriceps work CON 60°/s (better indicated by higher values) – 2 years post-op</b>                                                 |              |                  |               |                |             |                      |                               |            |                   |                                                |             |            |
| 1                                                                                                                                                 | Risberg 2009 | randomised trial | serious       | not assessable | not serious | serious <sup>a</sup> | none                          | 36         | 33                | SMD 0.11 higher<br>(0.36 lower to 0.59 higher) | ⊕⊕○○<br>Low | CRITICAL   |
| <b>Strength - Quadriceps work CON 240°/s (better indicated by higher values) – 2 years post-op</b>                                                |              |                  |               |                |             |                      |                               |            |                   |                                                |             |            |
| 1                                                                                                                                                 | Risberg 2009 | randomised trial | serious       | not assessable | not serious | serious <sup>a</sup> | none                          | 36         | 33                | SMD 0.16 lower<br>(0.63 lower to 0.32 higher)  | ⊕⊕○○<br>Low | CRITICAL   |
| <b>Strength - Hamstring work CON 60°/s (better indicated by higher values) – 6 months post-op</b>                                                 |              |                  |               |                |             |                      |                               |            |                   |                                                |             |            |
| 1                                                                                                                                                 | Risberg 2009 | randomised trial | serious       | not assessable | not serious | serious <sup>a</sup> | none                          | 34         | 31                | SMD 0.14 lower<br>(0.63 lower to 0.35 higher)  | ⊕⊕○○<br>Low | CRITICAL   |
| <b>Strength - Hamstring work CON 240°/s (better indicated by higher values) – 6 months post-op</b>                                                |              |                  |               |                |             |                      |                               |            |                   |                                                |             |            |
| 1                                                                                                                                                 | Risberg 2009 | randomised trial | serious       | not assessable | not serious | serious <sup>a</sup> | none                          | 34         | 31                | SMD 0.2 lower<br>(0.69 lower to 0.28 higher)   | ⊕⊕○○<br>Low | CRITICAL   |
| <b>Strength - Hamstring work CON 60°/s (better indicated by higher values) – 1 year post-op</b>                                                   |              |                  |               |                |             |                      |                               |            |                   |                                                |             |            |
| 1                                                                                                                                                 | Risberg 2009 | randomised trial | serious       | not assessable | not serious | serious <sup>a</sup> | none                          | 36         | 33                | SMD 0.09 lower<br>(0.56 lower to 0.38 higher)  | ⊕⊕○○<br>Low | CRITICAL   |
| <b>Strength - Hamstring work CON 240°/s (better indicated by higher values) – 1 year post-op</b>                                                  |              |                  |               |                |             |                      |                               |            |                   |                                                |             |            |
| 1                                                                                                                                                 | Risberg 2009 | randomised trial | serious       | not assessable | not serious | serious <sup>a</sup> | none                          | 36         | 33                | SMD 0.51 lower<br>(0.99 lower to 0.03 lower)   | ⊕⊕○○<br>Low | CRITICAL   |
| <b>Strength - Hamstring work CON 60°/s (better indicated by higher values) – 2 years post-op</b>                                                  |              |                  |               |                |             |                      |                               |            |                   |                                                |             |            |
| 1                                                                                                                                                 | Risberg 2009 | randomised trial | serious       | not assessable | not serious | serious <sup>a</sup> | none                          | 36         | 33                | SMD 0.22 higher<br>(0.25 lower to 0.7 higher)  | ⊕⊕○○<br>Low | CRITICAL   |
| <b>Strength - Hamstring work CON 240°/s (better indicated by higher values) – 2 years post-op</b>                                                 |              |                  |               |                |             |                      |                               |            |                   |                                                |             |            |
| 1                                                                                                                                                 | Risberg 2009 | randomised trial | serious       | not assessable | not serious | serious <sup>a</sup> | none                          | 36         | 33                | SMD 0.74 lower<br>(1.23 lower to 0.25 lower)   | ⊕⊕○○<br>Low | CRITICAL   |
| <b>Balance</b>                                                                                                                                    |              |                  |               |                |             |                      |                               |            |                   |                                                |             |            |
| 2                                                                                                                                                 |              |                  |               |                |             |                      |                               |            |                   |                                                |             |            |
| <b>Balance - Balance index, static measured on instrumented unstable platform (KAT2000) (better indicated by lower values) – 3 months post-op</b> |              |                  |               |                |             |                      |                               |            |                   |                                                |             |            |

| Certainty assessment                                                                                                                               |              |                  |               |                |             |                             | No of patients                |            | Effect            |                                                 | Certainty        | Importance |
|----------------------------------------------------------------------------------------------------------------------------------------------------|--------------|------------------|---------------|----------------|-------------|-----------------------------|-------------------------------|------------|-------------------|-------------------------------------------------|------------------|------------|
| No of studies                                                                                                                                      | Study design | Risk of bias     | Inconsistency | Indirectness   | Imprecision | Other considerations        | Plyometric + agility training | Usual care | Relative (95% CI) | Absolute (95% CI)                               |                  |            |
| 1                                                                                                                                                  | Risberg 2007 | randomised trial | serious       | not assessable | not serious | serious <sup>a</sup>        | none                          | 36         | 31                | SMD 0.4 lower<br>(0.89 lower to 0.08 higher)    | ⊕⊕○○<br>Low      | IMPORTANT  |
| <b>Balance - Balance index, dynamic measured on instrumented unstable platform (KAT2000) (better indicated by lower values) – 3 months post-op</b> |              |                  |               |                |             |                             |                               |            |                   |                                                 |                  |            |
| 1                                                                                                                                                  | Risberg 2007 | randomised trial | serious       | not assessable | not serious | serious <sup>a</sup>        | none                          | 36         | 31                | SMD 0.19 lower<br>(0.67 lower to 0.29 higher)   | ⊕⊕○○<br>Low      | IMPORTANT  |
| <b>Balance - Y balance test (better indicated by higher values) – 4 months post-op</b>                                                             |              |                  |               |                |             |                             |                               |            |                   |                                                 |                  |            |
| 1                                                                                                                                                  | Kasmi 2021   | randomised trial | serious       | not assessable | not serious | very serious <sup>a,b</sup> | none                          | 10         | 10                | SMD 5.43 higher<br>(3.36 higher to 7.51 higher) | ⊕○○○<br>Very low | IMPORTANT  |
| <b>Balance - Balance index, static measured on instrumented unstable platform (KAT2000) (better indicated by lower values) – 6 months post-op</b>  |              |                  |               |                |             |                             |                               |            |                   |                                                 |                  |            |
| 1                                                                                                                                                  | Risberg 2007 | randomised trial | serious       | not assessable | not serious | serious <sup>a</sup>        | none                          | 34         | 31                | SMD 0.08 lower<br>(0.57 lower to 0.4 higher)    | ⊕⊕○○<br>Low      | IMPORTANT  |
| <b>Balance - Balance index, dynamic measured on instrumented unstable platform (KAT2000) (better indicated by lower values) – 6 months post-op</b> |              |                  |               |                |             |                             |                               |            |                   |                                                 |                  |            |
| 1                                                                                                                                                  | Risberg 2007 | randomised trial | serious       | not assessable | not serious | serious <sup>a</sup>        | none                          | 34         | 31                | SMD 0.46 lower<br>(0.95 lower to 0.04 higher)   | ⊕⊕○○<br>Low      | IMPORTANT  |
| <b>Proprioception</b>                                                                                                                              |              |                  |               |                |             |                             |                               |            |                   |                                                 |                  |            |
| 1                                                                                                                                                  |              |                  |               |                |             |                             |                               |            |                   |                                                 |                  |            |
| <b>Proprioception – threshold to detection of passive motion (better indicated by lower values) – 3 months post-op</b>                             |              |                  |               |                |             |                             |                               |            |                   |                                                 |                  |            |
| 1                                                                                                                                                  | Risberg 2007 | randomised trial | serious       | not assessable | not serious | serious <sup>a</sup>        | none                          | 36         | 31                | SMD 0.37 lower<br>(0.85 lower to 0.11 higher)   | ⊕⊕○○<br>Low      | IMPORTANT  |
| <b>Proprioception - threshold to detection of passive motion (better indicated by lower values) – 6 months post-op</b>                             |              |                  |               |                |             |                             |                               |            |                   |                                                 |                  |            |
| 1                                                                                                                                                  | Risberg 2007 | randomised trial | serious       | not assessable | not serious | serious <sup>a</sup>        | none                          | 34         | 31                | SMD 0.03 lower<br>(0.52 lower to 0.46 higher)   | ⊕⊕○○<br>Low      | IMPORTANT  |
| <b>Patient reported outcome measures (PROM)</b>                                                                                                    |              |                  |               |                |             |                             |                               |            |                   |                                                 |                  |            |
| 3                                                                                                                                                  |              |                  |               |                |             |                             |                               |            |                   |                                                 |                  |            |
| <b>PROM - Cincinnati knee rating scale - (better indicated by higher values) – 3 months post-op</b>                                                |              |                  |               |                |             |                             |                               |            |                   |                                                 |                  |            |
| 1                                                                                                                                                  | Risberg 2007 | randomised trial | serious       | not assessable | not serious | serious <sup>a</sup>        | none                          | 31         | 31                | SMD 0.48 higher<br>(0.03 lower to 0.98 higher)  | ⊕⊕○○<br>Low      | CRITICAL   |
| <b>PROM - Lysholm (better indicated by higher values) – 4 months post-op</b>                                                                       |              |                  |               |                |             |                             |                               |            |                   |                                                 |                  |            |
| 1                                                                                                                                                  | Kasmi 2021   | randomised trial | serious       | not assessable | not serious | very serious <sup>a,b</sup> | none                          | 10         | 10                | SMD 0.80 higher<br>(0.12 lower to 1.72 higher)  | ⊕○○○<br>Very low | CRITICAL   |
| <b>PROM - ACL-RSI (better indicated by higher values) – 4 months post-op</b>                                                                       |              |                  |               |                |             |                             |                               |            |                   |                                                 |                  |            |
| 1                                                                                                                                                  | Kasmi 2021   | randomised trial | serious       | not assessable | not serious | very serious <sup>a,b</sup> | none                          | 10         | 10                | SMD 3.29 higher<br>(1.85 higher to 4.72 higher) | ⊕○○○<br>Very low | CRITICAL   |
| <b>PROM - Cincinnati knee rating scale - (better indicated by higher values) – 6 months post-op</b>                                                |              |                  |               |                |             |                             |                               |            |                   |                                                 |                  |            |
| 1                                                                                                                                                  | Risberg 2009 | randomised trial | serious       | not assessable | not serious | serious <sup>a</sup>        | none                          | 34         | 31                | SMD 0.63 higher<br>(0.13 higher to 1.13 higher) | ⊕⊕○○<br>Low      | CRITICAL   |
| <b>PROM - Cincinnati knee rating scale - (better indicated by higher values) – 1 year post-op</b>                                                  |              |                  |               |                |             |                             |                               |            |                   |                                                 |                  |            |
| 1                                                                                                                                                  | Risberg 2009 | randomised trial | serious       | not assessable | not serious | serious <sup>a</sup>        | none                          | 36         | 33                | SMD 0.43 higher<br>(0.05 lower to 0.91 higher)  | ⊕⊕○○<br>Low      | CRITICAL   |
| <b>PROM - Cincinnati knee rating scale - (better indicated by higher values) – 2 years post-op</b>                                                 |              |                  |               |                |             |                             |                               |            |                   |                                                 |                  |            |
| 1                                                                                                                                                  | Risberg 2009 | randomised trial | serious       | not assessable | not serious | serious <sup>a</sup>        | none                          | 36         | 33                | SMD 0.32 higher<br>(0.15 lower to 0.8 higher)   | ⊕⊕○○<br>Low      | CRITICAL   |
| <b>Functional activities</b>                                                                                                                       |              |                  |               |                |             |                             |                               |            |                   |                                                 |                  |            |
| 3                                                                                                                                                  |              |                  |               |                |             |                             |                               |            |                   |                                                 |                  |            |
| <b>Functional - single leg hop for distance (better indicated by higher values) – 4 months post-op</b>                                             |              |                  |               |                |             |                             |                               |            |                   |                                                 |                  |            |

| Certainty assessment                                                                                                   |                   |              |                                   |              |                             |                      | No of patients                |            | Effect                                        |                   | Certainty        | Importance |
|------------------------------------------------------------------------------------------------------------------------|-------------------|--------------|-----------------------------------|--------------|-----------------------------|----------------------|-------------------------------|------------|-----------------------------------------------|-------------------|------------------|------------|
| No of studies                                                                                                          | Study design      | Risk of bias | Inconsistency                     | Indirectness | Imprecision                 | Other considerations | Plyometric + agility training | Usual care | Relative (95% CI)                             | Absolute (95% CI) |                  |            |
| 1 Kasmi 2021                                                                                                           | randomised trial  | serious      | not assessable                    | not serious  | very serious <sup>a,b</sup> | none                 | 10                            | 10         | SMD 9.8 higher (6.3 higher to 13.3 higher)    |                   | ⊕○○○<br>Very low | CRITICAL   |
| <b>Functional - single leg hop for distance without hands (better indicated by higher values) – 4 months post-op</b>   |                   |              |                                   |              |                             |                      |                               |            |                                               |                   |                  |            |
| 1 Kasmi 2021                                                                                                           | randomised trial  | serious      | not assessable                    | not serious  | very serious <sup>a,b</sup> | none                 | 10                            | 10         | SMD 8.58 higher (5.49 higher to 11.68 higher) |                   | ⊕○○○<br>Very low | CRITICAL   |
| <b>Functional - triple hop (better indicated by higher values) – 4 months post-op</b>                                  |                   |              |                                   |              |                             |                      |                               |            |                                               |                   |                  |            |
| 1 Kasmi 2021                                                                                                           | randomised trial  | serious      | not assessable                    | not serious  | very serious <sup>a,b</sup> | none                 | 10                            | 10         | SMD 8.01 higher (5.11 higher to 10.92 higher) |                   | ⊕○○○<br>Very low | CRITICAL   |
| <b>Functional - crossover hop (better indicated by higher values) – 4 months post-op</b>                               |                   |              |                                   |              |                             |                      |                               |            |                                               |                   |                  |            |
| 1 Kasmi 2021                                                                                                           | randomised trial  | serious      | not assessable                    | not serious  | very serious <sup>a,b</sup> | none                 | 10                            | 10         | SMD 9.68 higher (6.22 higher to 13.14 higher) |                   | ⊕○○○<br>Very low | CRITICAL   |
| <b>Functional - 6m-timed hop (better indicated by higher values) – 4 months post-op</b>                                |                   |              |                                   |              |                             |                      |                               |            |                                               |                   |                  |            |
| 1 Kasmi 2021                                                                                                           | randomised trial  | serious      | not assessable                    | not serious  | very serious <sup>a,b</sup> | none                 | 10                            | 10         | SMD 8.83 higher (5.65 higher to 12.00 higher) |                   | ⊕○○○<br>Very low | CRITICAL   |
| <b>Functional - single leg hop for distance (m) (better indicated by higher values) – 6 months post-op</b>             |                   |              |                                   |              |                             |                      |                               |            |                                               |                   |                  |            |
| 2 Risberg 2009<br>Souissi 2011                                                                                         | randomised trials | serious      | serious<br>I <sup>2</sup> =58%    | not serious  | very serious <sup>a,b</sup> | none                 | 42                            | 39         | SMD 0.60 higher (0.29 lower to 1.49 higher)   |                   | ⊕○○○<br>Very low | CRITICAL   |
| <b>Functional - triple hop for distance (m) (better indicated by higher values) – 6 months post-op</b>                 |                   |              |                                   |              |                             |                      |                               |            |                                               |                   |                  |            |
| 2 Risberg 2009<br>Souissi 2011                                                                                         | randomised trials | serious      | not serious<br>I <sup>2</sup> =0% | not serious  | serious <sup>a</sup>        | none                 | 42                            | 39         | SMD 0.46 higher (0.02 higher to 0.90 higher)  |                   | ⊕⊕○○<br>Low      | CRITICAL   |
| <b>Functional - stairs hop test (m) (better indicated by higher values) – 6 months post-op</b>                         |                   |              |                                   |              |                             |                      |                               |            |                                               |                   |                  |            |
| 1 Risberg 2009                                                                                                         | randomised trial  | serious      | not assessable                    | not serious  | serious <sup>a</sup>        | none                 | 34                            | 31         | SMD 0 (0.49 lower to 0.49 higher)             |                   | ⊕⊕○○<br>Low      | CRITICAL   |
| <b>Functional – five jump test distance (m) (better indicated by higher values) – 6 months post-op</b>                 |                   |              |                                   |              |                             |                      |                               |            |                                               |                   |                  |            |
| Souissi 2011                                                                                                           | randomised trial  | serious      | not assessable                    | not serious  | very serious <sup>a,b</sup> | none                 | 8                             | 8          | SMD 0.69 higher (0.33 lower to 1.71 higher)   |                   | ⊕○○○<br>Very low | CRITICAL   |
| <b>Functional – agility t-test (s) reported as improvement (better indicated by higher values) – 6 months post-op</b>  |                   |              |                                   |              |                             |                      |                               |            |                                               |                   |                  |            |
| Souissi 2011                                                                                                           | randomised trial  | serious      | not assessable                    | not serious  | very serious <sup>a,b</sup> | none                 | 8                             | 8          | SMD 0.49 higher (0.51 lower to 1.49 higher)   |                   | ⊕○○○<br>Very low | CRITICAL   |
| <b>Functional – squat jump height (cm) (better indicated by higher values) – 6 months post-op</b>                      |                   |              |                                   |              |                             |                      |                               |            |                                               |                   |                  |            |
| Souissi 2011                                                                                                           | randomised trial  | serious      | not assessable                    | not serious  | very serious <sup>a,b</sup> | none                 | 8                             | 8          | SMD 0.53 higher (0.47 lower to 1.54 higher)   |                   | ⊕○○○<br>Very low | CRITICAL   |
| <b>Functional – countermovement jump height (cm) (better indicated by higher values) – 6 months post-op</b>            |                   |              |                                   |              |                             |                      |                               |            |                                               |                   |                  |            |
| Souissi 2011                                                                                                           | randomised trial  | serious      | not assessable                    | not serious  | very serious <sup>a,b</sup> | none                 | 8                             | 8          | SMD 0.15 higher (0.83 lower to 1.13 higher)   |                   | ⊕○○○<br>Very low | CRITICAL   |
| <b>Functional – arm countermovement jump height (cm) (better indicated by higher values) – 6 months post-op</b>        |                   |              |                                   |              |                             |                      |                               |            |                                               |                   |                  |            |
| Souissi 2011                                                                                                           | randomised trial  | serious      | not assessable                    | not serious  | very serious <sup>a,b</sup> | none                 | 8                             | 8          | SMD 0.75 higher (0.27 lower to 1.78 higher)   |                   | ⊕○○○<br>Very low | CRITICAL   |
| <b>Functional – single leg countermovement jump height (cm) (better indicated by higher values) – 6 months post-op</b> |                   |              |                                   |              |                             |                      |                               |            |                                               |                   |                  |            |
| Souissi 2011                                                                                                           | randomised trial  | serious      | not assessable                    | not serious  | very serious <sup>a,b</sup> | none                 | 8                             | 8          | SMD 1.05 higher (0.02 lower to 2.11 higher)   |                   | ⊕○○○<br>Very low | CRITICAL   |
| <b>Functional - single leg hop for distance (m) (better indicated by higher values) – 1 year post-op</b>               |                   |              |                                   |              |                             |                      |                               |            |                                               |                   |                  |            |
| 1 Risberg 2009                                                                                                         | randomised trials | serious      | not assessable                    | not serious  | serious <sup>a</sup>        | none                 | 36                            | 33         | SMD 0.16 higher (0.31 lower to 0.63 higher)   |                   | ⊕⊕○○<br>Low      | CRITICAL   |
| <b>Functional - single leg hop for distance (m) (better indicated by higher values) – 1 year post-op</b>               |                   |              |                                   |              |                             |                      |                               |            |                                               |                   |                  |            |

| Certainty assessment                                                                                  |              |                  |               |                |             |                      | No of patients                |            | Effect            |                                                | Certainty        | Importance |
|-------------------------------------------------------------------------------------------------------|--------------|------------------|---------------|----------------|-------------|----------------------|-------------------------------|------------|-------------------|------------------------------------------------|------------------|------------|
| No of studies                                                                                         | Study design | Risk of bias     | Inconsistency | Indirectness   | Imprecision | Other considerations | Plyometric + agility training | Usual care | Relative (95% CI) | Absolute (95% CI)                              |                  |            |
| 1                                                                                                     | Risberg 2009 | randomised trial | serious       | not assessable | not serious | serious <sup>a</sup> | none                          | 36         | 33                | SMD 0.01 higher<br>(0.46 lower to 0.48 higher) | ⊕⊕○○<br>Low      | CRITICAL   |
| <b>Functional - triple hop for distance (m) (better indicated by higher values) – 1 year post-op</b>  |              |                  |               |                |             |                      |                               |            |                   |                                                |                  |            |
| 1                                                                                                     | Risberg 2009 | randomised trial | serious       | not assessable | not serious | serious <sup>a</sup> | none                          | 36         | 33                | SMD 0.07 higher<br>(0.4 lower to 0.54 higher)  | ⊕⊕○○<br>Low      | CRITICAL   |
| <b>Functional - stairs hop test (better indicated by higher values) – 1 year post-op</b>              |              |                  |               |                |             |                      |                               |            |                   |                                                |                  |            |
| 1                                                                                                     | Risberg 2009 | randomised trial | serious       | not assessable | not serious | serious <sup>a</sup> | none                          | 36         | 33                | SMD 0.11 higher<br>(0.37 lower to 0.58 higher) | ⊕⊕○○<br>Low      | CRITICAL   |
| <b>functional - triple hop for distance (m) (better indicated by higher values) – 2 years post-op</b> |              |                  |               |                |             |                      |                               |            |                   |                                                |                  |            |
| 1                                                                                                     | Risberg 2009 | randomised trial | serious       | not assessable | not serious | serious <sup>a</sup> | none                          | 36         | 33                | SMD 0.02 higher<br>(0.45 lower to 0.49 higher) | ⊕⊕○○<br>Low      | CRITICAL   |
| <b>Functional - stairs hop test (better indicated by higher values) – 2 year post-op</b>              |              |                  |               |                |             |                      |                               |            |                   |                                                |                  |            |
| 1                                                                                                     | Risberg 2009 | randomised trial | serious       | not assessable | not serious | serious <sup>a</sup> | none                          | 36         | 33                | SMD 0.08 lower<br>(0.56 lower to 0.39 higher)  | ⊕⊕○○<br>Low      | CRITICAL   |
| <b>Pain</b>                                                                                           |              |                  |               |                |             |                      |                               |            |                   |                                                |                  |            |
| 2                                                                                                     |              |                  |               |                |             |                      |                               |            |                   |                                                |                  |            |
| <b>Pain - pain VAS (better indicated by lower values) – 3 months post-op</b>                          |              |                  |               |                |             |                      |                               |            |                   |                                                |                  |            |
| 1                                                                                                     | Risberg 2007 | randomised trial | very serious  | not assessable | not serious | serious <sup>a</sup> | none                          | 36         | 31                | SMD 0.28 higher<br>(0.2 lower to 0.76 higher)  | ⊕○○○<br>Very low | CRITICAL   |
| <b>Pain - pain VAS (better indicated by lower values) – 6 months post-op</b>                          |              |                  |               |                |             |                      |                               |            |                   |                                                |                  |            |
| 1                                                                                                     | Risberg 2009 | randomised trial | serious       | not assessable | not serious | serious <sup>a</sup> | none                          | 36         | 33                | SMD 0.19 lower<br>(0.66 lower to 0.29 higher)  | ⊕⊕○○<br>Low      | CRITICAL   |
| <b>Pain - pain VAS (better indicated by lower values) – 1 year post-op</b>                            |              |                  |               |                |             |                      |                               |            |                   |                                                |                  |            |
| 1                                                                                                     | Risberg 2009 | randomised trial | serious       | not assessable | not serious | serious <sup>a</sup> | none                          | 36         | 33                | SMD 0.52 lower<br>(1 lower to 0.04 lower)      | ⊕⊕○○<br>Low      | CRITICAL   |
| <b>Pain - pain VAS (better indicated by lower values) – 2 years post-op</b>                           |              |                  |               |                |             |                      |                               |            |                   |                                                |                  |            |
| 1                                                                                                     | Risberg 2009 | randomised trial | serious       | not assessable | not serious | serious <sup>a</sup> | none                          | 36         | 33                | SMD 0.33 lower<br>(0.81 lower to 0.15 higher)  | ⊕⊕○○<br>Low      | CRITICAL   |
| <b>Laxity</b>                                                                                         |              |                  |               |                |             |                      |                               |            |                   |                                                |                  |            |
| 2                                                                                                     |              |                  |               |                |             |                      |                               |            |                   |                                                |                  |            |
| <b>Laxity - difference between limbs (mm) (better indicated by lower values) – 3 months post-op</b>   |              |                  |               |                |             |                      |                               |            |                   |                                                |                  |            |
| 1                                                                                                     | Risberg 2007 | randomised trial | serious       | not assessable | not serious | serious <sup>a</sup> | none                          | 36         | 31                | SMD 0.1 higher<br>(0.38 lower to 0.58 higher)  | ⊕⊕○○<br>Low      | CRITICAL   |
| <b>Laxity - difference between limbs (mm) (better indicated by lower values) – 6 months post-op</b>   |              |                  |               |                |             |                      |                               |            |                   |                                                |                  |            |
| 1                                                                                                     | Risberg 2009 | randomised trial | serious       | not assessable | not serious | serious <sup>a</sup> | none                          | 34         | 31                | SMD 0.14 higher<br>(0.34 lower to 0.63 higher) | ⊕⊕○○<br>Low      | CRITICAL   |
| <b>Laxity - difference between limbs (mm) (better indicated by lower values) – 1 year post-op</b>     |              |                  |               |                |             |                      |                               |            |                   |                                                |                  |            |
| 1                                                                                                     | Risberg 2009 | randomised trial | serious       | not assessable | not serious | serious <sup>a</sup> | none                          | 36         | 33                | SMD 0.18 higher<br>(0.29 lower to 0.66 higher) | ⊕⊕○○<br>Low      | CRITICAL   |
| <b>Laxity - difference between limbs (mm) (better indicated by lower values) – 2 years post-op</b>    |              |                  |               |                |             |                      |                               |            |                   |                                                |                  |            |
| 1                                                                                                     | Risberg 2009 | randomised trial | serious       | not assessable | not serious | serious <sup>a</sup> | none                          | 36         | 33                | SMD 0.35 higher<br>(0.12 lower to 0.83 higher) | ⊕⊕○○<br>Low      | CRITICAL   |
| <b>Adverse events</b>                                                                                 |              |                  |               |                |             |                      |                               |            |                   |                                                |                  |            |
| Risberg 2007                                                                                          |              |                  |               |                |             |                      |                               |            |                   | None reported                                  |                  | CRITICAL   |

| Certainty assessment |              |              |               |              |             |                      | No of patients                |            | Effect            |                   | Certainty | Importance |
|----------------------|--------------|--------------|---------------|--------------|-------------|----------------------|-------------------------------|------------|-------------------|-------------------|-----------|------------|
| No of studies        | Study design | Risk of bias | Inconsistency | Indirectness | Imprecision | Other considerations | Plyometric + agility training | Usual care | Relative (95% CI) | Absolute (95% CI) |           |            |
| Risberg 2009         |              |              |               |              |             |                      |                               |            | None reported     |                   |           | CRITICAL   |
| Souissi 2011         |              |              |               |              |             |                      |                               |            | None reported     |                   |           | CRITICAL   |
| Kasmi 2021           |              |              |               |              |             |                      |                               |            | None reported     |                   |           | CRITICAL   |

CI: confidence interval; SMD: standardised mean difference

- a. Total participants <800  
b. 95% CI of an SMD extends > 0.5 points in either direction

## Plyometric and eccentric training versus usual care in rehabilitation after ACLR

Bibliography: Kasmi 2021

| Certainty assessment                                                                                                 |                  |              |                |              |                             |                      | No of patients                  |            | Effect                                            |                   | Certainty        | Importance |
|----------------------------------------------------------------------------------------------------------------------|------------------|--------------|----------------|--------------|-----------------------------|----------------------|---------------------------------|------------|---------------------------------------------------|-------------------|------------------|------------|
| No of studies                                                                                                        | Study design     | Risk of bias | Inconsistency  | Indirectness | Imprecision                 | Other considerations | Plyometric + eccentric training | Usual care | Relative (95% CI)                                 | Absolute (95% CI) |                  |            |
| <b>Balance</b>                                                                                                       |                  |              |                |              |                             |                      |                                 |            |                                                   |                   |                  |            |
| 1                                                                                                                    |                  |              |                |              |                             |                      |                                 |            |                                                   |                   |                  |            |
| <b>Balance - Y balance test (better indicated by higher values) – 4 months post-op</b>                               |                  |              |                |              |                             |                      |                                 |            |                                                   |                   |                  |            |
| 1<br>Kasmi 2021                                                                                                      | randomised trial | serious      | not assessable | not serious  | very serious <sup>a,b</sup> | none                 | 10                              | 10         | SMD 7.41 higher<br>(4.70 higher to 10.12 higher)  |                   | ⊕○○○<br>Very low | IMPORTANT  |
| <b>Patient reported outcome measures (PROM)</b>                                                                      |                  |              |                |              |                             |                      |                                 |            |                                                   |                   |                  |            |
| 1                                                                                                                    |                  |              |                |              |                             |                      |                                 |            |                                                   |                   |                  |            |
| <b>PROM - Lysholm (better indicated by higher values) – 4 months post-op</b>                                         |                  |              |                |              |                             |                      |                                 |            |                                                   |                   |                  |            |
| 1<br>Kasmi 2021                                                                                                      | randomised trial | serious      | not assessable | not serious  | very serious <sup>a,b</sup> | none                 | 10                              | 10         | SMD 2.50 higher<br>(1.27 higher to 3.73 higher)   |                   | ⊕○○○<br>Very low | CRITICAL   |
| <b>PROM - ACL-RSI (better indicated by higher values) – 4 months post-op</b>                                         |                  |              |                |              |                             |                      |                                 |            |                                                   |                   |                  |            |
| 1<br>Kasmi 2021                                                                                                      | randomised trial | serious      | not assessable | not serious  | very serious <sup>a,b</sup> | none                 | 10                              | 10         | SMD 6.68 higher<br>(4.21 higher to 9.15 higher)   |                   | ⊕○○○<br>Very low | CRITICAL   |
| <b>Functional activities</b>                                                                                         |                  |              |                |              |                             |                      |                                 |            |                                                   |                   |                  |            |
| 1                                                                                                                    |                  |              |                |              |                             |                      |                                 |            |                                                   |                   |                  |            |
| <b>Functional - single leg hop for distance (better indicated by higher values) – 4 months post-op</b>               |                  |              |                |              |                             |                      |                                 |            |                                                   |                   |                  |            |
| 1<br>Kasmi 2021                                                                                                      | randomised trial | serious      | not assessable | not serious  | very serious <sup>a,b</sup> | none                 | 10                              | 10         | SMD 12.67 higher<br>(8.20 higher to 17.14 higher) |                   | ⊕○○○<br>Very low | CRITICAL   |
| <b>Functional - single leg hop for distance without hands (better indicated by higher values) – 4 months post-op</b> |                  |              |                |              |                             |                      |                                 |            |                                                   |                   |                  |            |
| 1<br>Kasmi 2021                                                                                                      | randomised trial | serious      | not assessable | not serious  | very serious <sup>a,b</sup> | none                 | 10                              | 10         | SMD 11.96 higher<br>(7.73 higher to 16.19 higher) |                   | ⊕○○○<br>Very low | CRITICAL   |
| <b>Functional - triple hop for distance (better indicated by higher values) – 4 months post-op</b>                   |                  |              |                |              |                             |                      |                                 |            |                                                   |                   |                  |            |
| 1<br>Kasmi 2021                                                                                                      | randomised trial | serious      | not assessable | not serious  | very serious <sup>a,b</sup> | none                 | 10                              | 10         | SMD 10.79 higher<br>(6.96 higher to 14.62 higher) |                   | ⊕○○○<br>Very low | CRITICAL   |
| <b>Functional - crossover hop (better indicated by higher values) – 4 months post-op</b>                             |                  |              |                |              |                             |                      |                                 |            |                                                   |                   |                  |            |
| 1<br>Kasmi 2021                                                                                                      | randomised trial | serious      | not assessable | not serious  | very serious <sup>a,b</sup> | none                 | 10                              | 10         | SMD 13.41 higher<br>(8.69 higher to 18.12 higher) |                   | ⊕○○○<br>Very low | CRITICAL   |
| <b>Functional - 6m-timed hop (better indicated by higher values) – 4 months post-op</b>                              |                  |              |                |              |                             |                      |                                 |            |                                                   |                   |                  |            |
| 1<br>Kasmi 2021                                                                                                      | randomised trial | serious      | not assessable | not serious  | very serious <sup>a,b</sup> | none                 | 10                              | 10         | SMD 11.59 higher<br>(7.49 higher to 15.70 higher) |                   | ⊕○○○<br>Very low | CRITICAL   |
| <b>Adverse events</b>                                                                                                |                  |              |                |              |                             |                      |                                 |            |                                                   |                   |                  |            |
| Kasmi 2021                                                                                                           |                  |              |                |              |                             |                      |                                 |            | None reported                                     |                   |                  | CRITICAL   |

CI: confidence interval; SMD: standardised mean difference

- a. Total participants <800  
b. 95% CI of an SMD extends > 0.5 points in either direction

## Low intensity versus high intensity plyometric training in rehabilitation after ACLR

Bibliography: Chmielewski 2016

| Certainty assessment                                                                                            |                     |              |                |              |                              |                      | No of patients |                | Effect                                         |                   | Certainty        | Importance |
|-----------------------------------------------------------------------------------------------------------------|---------------------|--------------|----------------|--------------|------------------------------|----------------------|----------------|----------------|------------------------------------------------|-------------------|------------------|------------|
| No of studies                                                                                                   | Study design        | Risk of bias | Inconsistency  | Indirectness | Imprecision                  | Other considerations | Low intensity  | High intensity | Relative (95% CI)                              | Absolute (95% CI) |                  |            |
| <b>Strength</b>                                                                                                 |                     |              |                |              |                              |                      |                |                |                                                |                   |                  |            |
| 1                                                                                                               |                     |              |                |              |                              |                      |                |                |                                                |                   |                  |            |
| <b>Strength - Quadriceps CON 60°/s LSI% change (better indicated by higher values) – 5 months post-op</b>       |                     |              |                |              |                              |                      |                |                |                                                |                   |                  |            |
| 1<br>Chmielewski<br>2016                                                                                        | randomised<br>trial | not serious  | not assessable | not serious  | very serious <sup>a, b</sup> | none                 | 12             | 12             | SMD 0.2 higher<br>(0.6 lower to 1 higher)      |                   | ⊕⊕○○<br>Low      | CRITICAL   |
| <b>Patient reported outcomes (PROM)</b>                                                                         |                     |              |                |              |                              |                      |                |                |                                                |                   |                  |            |
| 1                                                                                                               |                     |              |                |              |                              |                      |                |                |                                                |                   |                  |            |
| <b>PROM - IKDC (better indicated by higher values) – 5 months post-op</b>                                       |                     |              |                |              |                              |                      |                |                |                                                |                   |                  |            |
| 1<br>Chmielewski<br>2016                                                                                        | randomised<br>trial | serious      | not assessable | not serious  | very serious <sup>a, b</sup> | none                 | 12             | 12             | SMD 0.46 higher<br>(0.35 lower to 1.27 higher) |                   | ⊕○○○<br>Very low | CRITICAL   |
| <b>PROM – Tampa scale of kinesiophobia (TSK-11) Score (better indicated by lower values) – 5 months post-op</b> |                     |              |                |              |                              |                      |                |                |                                                |                   |                  |            |
| 1<br>Chmielewski<br>2016                                                                                        | randomised<br>trial | serious      | not assessable | not serious  | very serious <sup>a, b</sup> | none                 | 12             | 12             | SMD 0.07 higher<br>(0.73 lower to 0.87 higher) |                   | ⊕○○○<br>Very low | CRITICAL   |
| <b>PROM – knee activity self-efficacy score (better indicated by higher values) – 5 months post-op</b>          |                     |              |                |              |                              |                      |                |                |                                                |                   |                  |            |
| 1<br>Chmielewski<br>2016                                                                                        | randomised<br>trial | serious      | not assessable | not serious  | very serious <sup>a, b</sup> | none                 | 12             | 12             | SMD 0.47 lower<br>(1.28 lower to 0.34 higher)  |                   | ⊕○○○<br>Very low | CRITICAL   |
| <b>PROM – pain catastrophizing scale (better indicated by lower values) – 5 months post-op</b>                  |                     |              |                |              |                              |                      |                |                |                                                |                   |                  |            |
| 1<br>Chmielewski<br>2016                                                                                        | randomised<br>trial | serious      | not assessable | not serious  | very serious <sup>a, b</sup> | none                 | 12             | 12             | SMD 0.32 higher<br>(0.49 lower to 1.12 higher) |                   | ⊕○○○<br>Very low | CRITICAL   |
| <b>Functional activities</b>                                                                                    |                     |              |                |              |                              |                      |                |                |                                                |                   |                  |            |
| 1                                                                                                               |                     |              |                |              |                              |                      |                |                |                                                |                   |                  |            |
| <b>Functional - Single leg hop for distance (better indicated by higher values) – 5 months post-op</b>          |                     |              |                |              |                              |                      |                |                |                                                |                   |                  |            |
| 1<br>Chmielewski<br>2016                                                                                        | randomised<br>trial | not serious  | not assessable | not serious  | very serious <sup>a, b</sup> | none                 | 12             | 12             | SMD 0.46 higher<br>(0.36 lower to 1.27 higher) |                   | ⊕⊕○○<br>Low      | CRITICAL   |
| <b>Laxity</b>                                                                                                   |                     |              |                |              |                              |                      |                |                |                                                |                   |                  |            |
| 1                                                                                                               |                     |              |                |              |                              |                      |                |                |                                                |                   |                  |            |
| <b>Laxity - laxity (better indicated by lower values) – 5 months post-op</b>                                    |                     |              |                |              |                              |                      |                |                |                                                |                   |                  |            |
| 1<br>Chmielewski<br>2016                                                                                        | randomised<br>trial | not serious  | not assessable | not serious  | very serious <sup>a, b</sup> | none                 | 12             | 12             | SMD 0.35 higher<br>(0.46 lower to 1.16 higher) |                   | ⊕⊕○○<br>Low      | CRITICAL   |
| <b>Pain</b>                                                                                                     |                     |              |                |              |                              |                      |                |                |                                                |                   |                  |            |
| 1                                                                                                               |                     |              |                |              |                              |                      |                |                |                                                |                   |                  |            |
| <b>Pain - pain (better indicated by lower values) – 5 months post-op</b>                                        |                     |              |                |              |                              |                      |                |                |                                                |                   |                  |            |
| 1<br>Chmielewski<br>2016                                                                                        | randomised<br>trial | serious      | not assessable | not serious  | very serious <sup>a, b</sup> | none                 | 12             | 12             | SMD 0.17 lower<br>(0.98 lower to 0.63 higher)  |                   | ⊕○○○<br>Very low | CRITICAL   |
| <b>Adverse events</b>                                                                                           |                     |              |                |              |                              |                      |                |                |                                                |                   |                  |            |
| Chmielewski<br>2016                                                                                             |                     |              |                |              |                              |                      |                |                | None reported                                  |                   |                  | CRITICAL   |

CI: confidence interval; SMD: standardised mean difference

- a. Total participants <800  
b. 95% CI of an SMD extends > 0.5 points in either direction

Cross-education (contralateral leg strength training) versus usual care in rehabilitation after ACLR

Bibliography: Papandreu 2007, Papandreu 2009, Papandreu 2013, Zult 2018, Zult 2019, Harput 2019, Minshull 2021

| Certainty assessment                                                                             |                   |              |                                     |              |                             |                      | No of patients  |            | Effect                                          |                   | Certainty        | Importance |
|--------------------------------------------------------------------------------------------------|-------------------|--------------|-------------------------------------|--------------|-----------------------------|----------------------|-----------------|------------|-------------------------------------------------|-------------------|------------------|------------|
| No of studies                                                                                    | Study design      | Risk of bias | Inconsistency                       | Indirectness | Imprecision                 | Other considerations | Cross-education | Usual care | Relative (95% CI)                               | Absolute (95% CI) |                  |            |
| <b>Strength</b>                                                                                  |                   |              |                                     |              |                             |                      |                 |            |                                                 |                   |                  |            |
| 5                                                                                                |                   |              |                                     |              |                             |                      |                 |            |                                                 |                   |                  |            |
| <b>Strength - Quadriceps ISOM 60-65° (better indicated by higher values) – 5-8 weeks post-op</b> |                   |              |                                     |              |                             |                      |                 |            |                                                 |                   |                  |            |
| 2<br>Papandreu 2013<br>Zult 2019                                                                 | randomised trials | serious      | very serious<br>I <sup>2</sup> =91% | not serious  | very serious <sup>a,b</sup> | none                 | 36              | 35         | SMD 0.10 higher<br>(1.61 lower to 1.81 higher)  |                   | ⊕○○○<br>Very low | CRITICAL   |
| <b>Strength - Quadriceps ISOM 45° (better indicated by higher values) – 2 months post-op</b>     |                   |              |                                     |              |                             |                      |                 |            |                                                 |                   |                  |            |
| 1<br>Papandreu 2007                                                                              | randomised trial  | serious      | not assessable                      | not serious  | very serious <sup>a,b</sup> | none                 | 14              | 14         | SMD 0.94 higher<br>(0.15 higher to 1.73 higher) |                   | ⊕○○○<br>Very low | CRITICAL   |
| <b>Strength - Quadriceps ISOM 90° (better indicated by higher values) – 2 months post-op</b>     |                   |              |                                     |              |                             |                      |                 |            |                                                 |                   |                  |            |
| 1<br>Papandreu 2007                                                                              | randomised trial  | serious      | not assessable                      | not serious  | very serious <sup>a,b</sup> | none                 | 14              | 14         | SMD 1.19 higher<br>(0.37 higher to 2 higher)    |                   | ⊕○○○<br>Very low | CRITICAL   |
| <b>Strength - Quadriceps ISOM 30-65° (better indicated by higher values) – 3 months post-op</b>  |                   |              |                                     |              |                             |                      |                 |            |                                                 |                   |                  |            |
| 3<br>Zult 2019<br>Harput 2019<br>Minshull 2021                                                   | randomised trials | very serious | very serious<br>I <sup>2</sup> =91% | not serious  | very serious <sup>a,b</sup> | none                 | 60              | 59         | SMD 0.48 higher<br>(0.83 lower to 1.79 higher)  |                   | ⊕○○○<br>Very low | CRITICAL   |
| <b>Strength - Quadriceps CON 60°/s (better indicated by higher values) – 3 months post-op</b>    |                   |              |                                     |              |                             |                      |                 |            |                                                 |                   |                  |            |
| 1<br>Zult 2019                                                                                   | randomised trial  | serious      | not assessable                      | not serious  | very serious <sup>a,b</sup> | none                 | 22              | 21         | SMD 0.64 lower<br>(1.25 lower to 0.02 lower)    |                   | ⊕○○○<br>Very low | CRITICAL   |
| <b>Strength - Quadriceps CON 120°/s (better indicated by higher values) – 3 months post-op</b>   |                   |              |                                     |              |                             |                      |                 |            |                                                 |                   |                  |            |
| 1<br>Zult 2019                                                                                   | randomised trial  | serious      | not assessable                      | not serious  | very serious <sup>a,b</sup> | none                 | 22              | 21         | SMD 0.05 higher<br>(0.55 lower to 0.64 higher)  |                   | ⊕○○○<br>Very low | CRITICAL   |
| <b>Strength - Quadriceps CON 180°/s (better indicated by higher values) – 3 months post-op</b>   |                   |              |                                     |              |                             |                      |                 |            |                                                 |                   |                  |            |
| 1<br>Zult 2019                                                                                   | randomised trial  | serious      | not assessable                      | not serious  | very serious <sup>a,b</sup> | none                 | 22              | 21         | SMD 0.06 higher<br>(0.54 lower to 0.66 higher)  |                   | ⊕○○○<br>Very low | CRITICAL   |
| <b>Strength - Quadriceps ISOM 30-65° (better indicated by higher values) – 6 months post-op</b>  |                   |              |                                     |              |                             |                      |                 |            |                                                 |                   |                  |            |
| 3<br>Zult 2019<br>Harput 2019<br>Minshull 2021                                                   | randomised trials | very serious | not serious<br>I <sup>2</sup> =0%   | not serious  | serious <sup>a</sup>        | none                 | 60              | 59         | SMD 0.06 lower<br>(0.42 lower to 0.3 higher)    |                   | ⊕○○○<br>Very low | CRITICAL   |
| <b>Strength - Quadriceps CON 60°/s (better indicated by higher values) – 6 months post-op</b>    |                   |              |                                     |              |                             |                      |                 |            |                                                 |                   |                  |            |
| 1<br>Zult 2019                                                                                   | randomised trial  | serious      | not assessable                      | not serious  | very serious <sup>a,b</sup> | none                 | 22              | 21         | SMD 0.3 lower<br>(0.9 lower to 0.3 higher)      |                   | ⊕○○○<br>Very low | CRITICAL   |
| <b>Strength - Quadriceps CON 120°/s (better indicated by higher values) – 6 months post-op</b>   |                   |              |                                     |              |                             |                      |                 |            |                                                 |                   |                  |            |
| 1<br>Zult 2019                                                                                   | randomised trial  | serious      | not assessable                      | not serious  | very serious <sup>a,b</sup> | none                 | 22              | 21         | SMD 0.17 higher<br>(0.42 lower to 0.77 higher)  |                   | ⊕○○○<br>Very low | CRITICAL   |
| <b>Strength - Quadriceps CON 180°/s (better indicated by higher values) – 6 months post-op</b>   |                   |              |                                     |              |                             |                      |                 |            |                                                 |                   |                  |            |
| 1<br>Zult 2019                                                                                   | randomised trial  | serious      | not assessable                      | not serious  | very serious <sup>a,b</sup> | none                 | 22              | 21         | SMD 0.18 higher<br>(0.42 lower to 0.78 higher)  |                   | ⊕○○○<br>Very low | CRITICAL   |
| <b>Strength - Quadriceps ECC 60°/s (better indicated by higher values) – 6 months post-op</b>    |                   |              |                                     |              |                             |                      |                 |            |                                                 |                   |                  |            |
| 1<br>Zult 2019                                                                                   | randomised trial  | serious      | not assessable                      | not serious  | very serious <sup>a,b</sup> | none                 | 22              | 21         | SMD 0.08 lower<br>(0.68 lower to 0.52 higher)   |                   | ⊕○○○<br>Very low | CRITICAL   |
| <b>Strength - Hamstring ISOM 65° (better indicated by higher values) – 5 weeks post-op</b>       |                   |              |                                     |              |                             |                      |                 |            |                                                 |                   |                  |            |

| Certainty assessment                                                                           |                            |                   |               |                                   |             |                             | No of patients  |            | Effect            |                                                 | Certainty        | Importance |
|------------------------------------------------------------------------------------------------|----------------------------|-------------------|---------------|-----------------------------------|-------------|-----------------------------|-----------------|------------|-------------------|-------------------------------------------------|------------------|------------|
| No of studies                                                                                  | Study design               | Risk of bias      | Inconsistency | Indirectness                      | Imprecision | Other considerations        | Cross-education | Usual care | Relative (95% CI) | Absolute (95% CI)                               |                  |            |
| 1                                                                                              | Zult 2019                  | randomised trial  | serious       | not assessable                    | not serious | very serious <sup>a,b</sup> | none            | 22         | 22                | SMD 0.11 lower<br>(0.69 lower to 0.49 higher)   | ⊕○○○<br>Very low | CRITICAL   |
| <b>Strength - Hamstring ISOM 30-65° (better indicated by higher values) – 3 months post-op</b> |                            |                   |               |                                   |             |                             |                 |            |                   |                                                 |                  |            |
| 2                                                                                              | Zult 2019<br>Minshull 2021 | randomised trials | serious       | not serious<br>I <sup>2</sup> =0% | not serious | serious <sup>a</sup>        | none            | 44         | 44                | SMD 0.09 higher<br>(0.33 lower to 0.5 higher)   | ⊕⊕○○<br>Low      | CRITICAL   |
| <b>Strength - Hamstring CON 60°/s (better indicated by higher values) – 3 months post-op</b>   |                            |                   |               |                                   |             |                             |                 |            |                   |                                                 |                  |            |
| 1                                                                                              | Zult 2019                  | randomised trial  | serious       | not assessable                    | not serious | very serious <sup>a,b</sup> | none            | 22         | 22                | SMD 0.62 lower<br>(1.22 lower to 0.01 lower)    | ⊕○○○<br>Very low | CRITICAL   |
| <b>Strength - Hamstring CON 120°/s (better indicated by higher values) – 3 months post-op</b>  |                            |                   |               |                                   |             |                             |                 |            |                   |                                                 |                  |            |
| 1                                                                                              | Zult 2019                  | randomised trial  | serious       | not assessable                    | not serious | very serious <sup>a,b</sup> | none            | 22         | 22                | SMD 0.41 lower<br>(1.01 lower to 0.19 higher)   | ⊕○○○<br>Very low | CRITICAL   |
| <b>Strength - Hamstring CON 180°/s (better indicated by higher values) – 3 months post-op</b>  |                            |                   |               |                                   |             |                             |                 |            |                   |                                                 |                  |            |
| 1                                                                                              | Zult 2019                  | randomised trial  | serious       | not assessable                    | not serious | very serious <sup>a,b</sup> | none            | 22         | 22                | SMD 0.15 lower<br>(0.75 lower to 0.44 higher)   | ⊕○○○<br>Very low | CRITICAL   |
| <b>Strength - Hamstring ISOM 30-65° (better indicated by higher values) – 6 months post-op</b> |                            |                   |               |                                   |             |                             |                 |            |                   |                                                 |                  |            |
| 2                                                                                              | Zult 2019<br>Minshull 2021 | randomised trials | serious       | not serious<br>I <sup>2</sup> =0% | not serious | very serious <sup>a,b</sup> | none            | 44         | 44                | SMD 0.1 lower<br>(0.52 lower to 0.32 higher)    | ⊕○○○<br>Very low | CRITICAL   |
| <b>Strength - Hamstring CON 60°/s (better indicated by higher values) – 6 months post-op</b>   |                            |                   |               |                                   |             |                             |                 |            |                   |                                                 |                  |            |
| 1                                                                                              | Zult 2019                  | randomised trial  | serious       | not assessable                    | not serious | very serious <sup>a,b</sup> | none            | 22         | 22                | SMD 0.25 lower<br>(0.84 lower to 0.34 higher)   | ⊕○○○<br>Very low | CRITICAL   |
| <b>Strength - Hamstring CON 120°/s (better indicated by higher values) – 6 months post-op</b>  |                            |                   |               |                                   |             |                             |                 |            |                   |                                                 |                  |            |
| 1                                                                                              | Zult 2019                  | randomised trial  | serious       | not assessable                    | not serious | very serious <sup>a,b</sup> | none            | 22         | 22                | SMD 0.18 lower<br>(0.77 lower to 0.41 higher)   | ⊕○○○<br>Very low | CRITICAL   |
| <b>Strength - Hamstring CON 180°/s (better indicated by higher values) – 6 months post-op</b>  |                            |                   |               |                                   |             |                             |                 |            |                   |                                                 |                  |            |
| 1                                                                                              | Zult 2019                  | randomised trial  | serious       | not assessable                    | not serious | very serious <sup>a,b</sup> | none            | 22         | 22                | SMD 0.46 higher<br>(0.14 lower to 1.06 higher)  | ⊕○○○<br>Very low | CRITICAL   |
| <b>Strength - Hamstring ECC 60°/s (better indicated by higher values) – 6 months post-op</b>   |                            |                   |               |                                   |             |                             |                 |            |                   |                                                 |                  |            |
| 1                                                                                              | Zult 2019                  | randomised trial  | serious       | not assessable                    | not serious | very serious <sup>a,b</sup> | none            | 22         | 22                | SMD 0<br>(0.59 lower to 0.59 higher)            | ⊕○○○<br>Very low | CRITICAL   |
| <b>Patient reported outcomes (PROM)</b>                                                        |                            |                   |               |                                   |             |                             |                 |            |                   |                                                 |                  |            |
| 4                                                                                              |                            |                   |               |                                   |             |                             |                 |            |                   |                                                 |                  |            |
| <b>PROM - Hughston Clinic Knee score (better indicated by lower values) – 1 month post-op</b>  |                            |                   |               |                                   |             |                             |                 |            |                   |                                                 |                  |            |
| 1                                                                                              | Zult 2019                  | randomised trial  | serious       | not assessable                    | not serious | very serious <sup>a,b</sup> | none            | 22         | 21                | SMD 0.89 higher<br>(0.26 higher to 1.52 higher) | ⊕○○○<br>Very low | CRITICAL   |
| <b>PROM - Lysholm score (better indicated by higher values) – 2 months post-op</b>             |                            |                   |               |                                   |             |                             |                 |            |                   |                                                 |                  |            |
| 1                                                                                              | Papandreou 2009            | randomised trial  | serious       | not assessable                    | not serious | very serious <sup>a,b</sup> | none            | 14         | 14                | SMD 1.26 higher<br>(0.44 higher to 2.08 higher) | ⊕○○○<br>Very low | CRITICAL   |
| <b>PROM - Hughston Clinic Knee score (better indicated by lower values) – 3 months post-op</b> |                            |                   |               |                                   |             |                             |                 |            |                   |                                                 |                  |            |
| 1                                                                                              | Zult 2019                  | randomised trial  | serious       | not assessable                    | not serious | very serious <sup>a,b</sup> | none            | 22         | 21                | SMD 0.5 higher<br>(0.11 lower to 1.11 higher)   | ⊕○○○<br>Very low | CRITICAL   |
| <b>PROM - Hughston Clinic Knee score (better indicated by lower values) – 6 months post-op</b> |                            |                   |               |                                   |             |                             |                 |            |                   |                                                 |                  |            |
| 1                                                                                              | Zult 2019                  | randomised trial  | serious       | not assessable                    | not serious | very serious <sup>a,b</sup> | none            | 22         | 21                | SMD 0.12 higher<br>(0.48 lower to 0.71 higher)  | ⊕○○○<br>Very low | CRITICAL   |
| <b>PROM - IKDC score (better indicated by higher values) – 6 months post-op</b>                |                            |                   |               |                                   |             |                             |                 |            |                   |                                                 |                  |            |
| 1                                                                                              | Harput 2019                | randomised trial  | very serious  | not assessable                    | not serious | very serious <sup>a,b</sup> | none            | 16         | 16                | SMD 0.28 higher<br>(0.42 lower to 0.98 higher)  | ⊕○○○<br>Very low | CRITICAL   |

| Certainty assessment                                                                                             |                   |              |                                            |              |                             |                      | No of patients  |            | Effect                                                                             |                   | Certainty        | Importance |
|------------------------------------------------------------------------------------------------------------------|-------------------|--------------|--------------------------------------------|--------------|-----------------------------|----------------------|-----------------|------------|------------------------------------------------------------------------------------|-------------------|------------------|------------|
| No of studies                                                                                                    | Study design      | Risk of bias | Inconsistency                              | Indirectness | Imprecision                 | Other considerations | Cross-education | Usual care | Relative (95% CI)                                                                  | Absolute (95% CI) |                  |            |
| Minshull 2021                                                                                                    | randomised trial  | serious      | not assessable                             | not serious  | very serious <sup>a,c</sup> | none                 | 22              | 22         | Results are not reported. Authors report no significant difference between groups. |                   | ⊕○○○<br>Very low | CRITICAL   |
| <b>Functional activities</b>                                                                                     |                   |              |                                            |              |                             |                      |                 |            |                                                                                    |                   |                  |            |
| 3                                                                                                                |                   |              |                                            |              |                             |                      |                 |            |                                                                                    |                   |                  |            |
| <b>Functional - single leg hop for distance (better indicated by higher values) – 6 months post-op</b>           |                   |              |                                            |              |                             |                      |                 |            |                                                                                    |                   |                  |            |
| 3<br>Zult 2019<br>Harput 2019<br>Minshull 2021                                                                   | randomised trials | very serious | not serious<br><sup>I<sup>2</sup>=0%</sup> | not serious  | serious <sup>a</sup>        | none                 | 56              | 54         | SMD 0.12 lower<br>(0.49 lower to 0.26 higher)                                      |                   | ⊕○○○<br>Very low | IMPORTANT  |
| <b>Proprioception</b>                                                                                            |                   |              |                                            |              |                             |                      |                 |            |                                                                                    |                   |                  |            |
| 1                                                                                                                |                   |              |                                            |              |                             |                      |                 |            |                                                                                    |                   |                  |            |
| <b>Proprioception - knee joint repositioning error 15° (better indicated by lower values) – 5 weeks post-op</b>  |                   |              |                                            |              |                             |                      |                 |            |                                                                                    |                   |                  |            |
| 1<br>Zult 2018                                                                                                   | randomised trial  | serious      | not assessable                             | not serious  | very serious <sup>a,b</sup> | none                 | 22              | 21         | SMD 0<br>(0.6 lower to 0.6 higher)                                                 |                   | ⊕○○○<br>Very low | IMPORTANT  |
| <b>Proprioception - knee joint repositioning error 30° (better indicated by lower values) – 5 weeks post-op</b>  |                   |              |                                            |              |                             |                      |                 |            |                                                                                    |                   |                  |            |
| 1<br>Zult 2018                                                                                                   | randomised trial  | serious      | not assessable                             | not serious  | very serious <sup>a,b</sup> | none                 | 22              | 21         | SMD 0.56 higher<br>(0.05 lower to 1.17 higher)                                     |                   | ⊕○○○<br>Very low | IMPORTANT  |
| <b>Proprioception - knee joint repositioning error 45° (better indicated by lower values) – 5 weeks post-op</b>  |                   |              |                                            |              |                             |                      |                 |            |                                                                                    |                   |                  |            |
| 1<br>Zult 2018                                                                                                   | randomised trial  | serious      | not assessable                             | not serious  | very serious <sup>a,b</sup> | none                 | 22              | 21         | SMD 0.25 lower<br>(0.85 lower to 0.36 higher)                                      |                   | ⊕○○○<br>Very low | IMPORTANT  |
| <b>Proprioception - knee joint repositioning error 60° (better indicated by lower values) – 5 weeks post-op</b>  |                   |              |                                            |              |                             |                      |                 |            |                                                                                    |                   |                  |            |
| 1<br>Zult 2018                                                                                                   | randomised trial  | serious      | not assessable                             | not serious  | very serious <sup>a,b</sup> | none                 | 22              | 21         | SMD 0<br>(0.6 lower to 0.6 higher)                                                 |                   | ⊕○○○<br>Very low | IMPORTANT  |
| <b>Proprioception - knee joint repositioning error 15° (better indicated by lower values) – 3 months post-op</b> |                   |              |                                            |              |                             |                      |                 |            |                                                                                    |                   |                  |            |
| 1<br>Zult 2018                                                                                                   | randomised trial  | serious      | not assessable                             | not serious  | very serious <sup>a,b</sup> | none                 | 22              | 21         | SMD 0<br>(0.6 lower to 0.6 higher)                                                 |                   | ⊕○○○<br>Very low | IMPORTANT  |
| <b>Proprioception - knee joint repositioning error 30° (better indicated by lower values) – 3 months post-op</b> |                   |              |                                            |              |                             |                      |                 |            |                                                                                    |                   |                  |            |
| 1<br>Zult 2018                                                                                                   | randomised trial  | serious      | not assessable                             | not serious  | very serious <sup>a,b</sup> | none                 | 22              | 21         | SMD 0.56 higher<br>(0.05 lower to 1.17 higher)                                     |                   | ⊕○○○<br>Very low | IMPORTANT  |
| <b>Proprioception - knee joint repositioning error 45° (better indicated by lower values) – 3 months post-op</b> |                   |              |                                            |              |                             |                      |                 |            |                                                                                    |                   |                  |            |
| 1<br>Zult 2018                                                                                                   | randomised trial  | serious      | not assessable                             | not serious  | very serious <sup>a,b</sup> | none                 | 22              | 21         | SMD 0.25 lower<br>(0.85 lower to 0.36 higher)                                      |                   | ⊕○○○<br>Very low | IMPORTANT  |
| <b>Proprioception - knee joint repositioning error 60° (better indicated by lower values) – 3 months post-op</b> |                   |              |                                            |              |                             |                      |                 |            |                                                                                    |                   |                  |            |
| 1<br>Zult 2018                                                                                                   | randomised trial  | serious      | not assessable                             | not serious  | very serious <sup>a,b</sup> | none                 | 22              | 21         | SMD 0<br>(0.6 lower to 0.6 higher)                                                 |                   | ⊕○○○<br>Very low | IMPORTANT  |
| <b>Proprioception - knee joint repositioning error 15° (better indicated by lower values) – 6 months post-op</b> |                   |              |                                            |              |                             |                      |                 |            |                                                                                    |                   |                  |            |
| 1<br>Zult 2018                                                                                                   | randomised trial  | serious      | not assessable                             | not serious  | very serious <sup>a,b</sup> | none                 | 22              | 21         | SMD 0.28 higher<br>(0.32 lower to 0.88 higher)                                     |                   | ⊕○○○<br>Very low | IMPORTANT  |
| <b>Proprioception - knee joint repositioning error 30° (better indicated by lower values) – 6 months post-op</b> |                   |              |                                            |              |                             |                      |                 |            |                                                                                    |                   |                  |            |
| 1<br>Zult 2018                                                                                                   | randomised trial  | serious      | not assessable                             | not serious  | very serious <sup>a,b</sup> | none                 | 22              | 21         | SMD 0.56 higher<br>(0.05 lower to 1.17 higher)                                     |                   | ⊕○○○<br>Very low | IMPORTANT  |
| <b>Proprioception - knee joint repositioning error 45° (better indicated by lower values) – 6 months post-op</b> |                   |              |                                            |              |                             |                      |                 |            |                                                                                    |                   |                  |            |
| 1<br>Zult 2018                                                                                                   | randomised trial  | serious      | not assessable                             | not serious  | very serious <sup>a,b</sup> | none                 | 22              | 21         | SMD 0.25 lower<br>(0.85 lower to 0.36 higher)                                      |                   | ⊕○○○<br>Very low | IMPORTANT  |
| <b>Proprioception - knee joint repositioning error 60° (better indicated by lower values) – 6 months post-op</b> |                   |              |                                            |              |                             |                      |                 |            |                                                                                    |                   |                  |            |
| 1<br>Zult 2018                                                                                                   | randomised trial  | serious      | not assessable                             | not serious  | very serious <sup>a,b</sup> | none                 | 22              | 21         | SMD 0.33 lower<br>(0.93 lower to 0.28 higher)                                      |                   | ⊕○○○<br>Very low | IMPORTANT  |
| <b>Balance</b>                                                                                                   |                   |              |                                            |              |                             |                      |                 |            |                                                                                    |                   |                  |            |

| Certainty assessment                                                                                                                |                  |              |                |              |                             |                      | No of patients  |            | Effect                                         |                   | Certainty        | Importance |
|-------------------------------------------------------------------------------------------------------------------------------------|------------------|--------------|----------------|--------------|-----------------------------|----------------------|-----------------|------------|------------------------------------------------|-------------------|------------------|------------|
| No of studies                                                                                                                       | Study design     | Risk of bias | Inconsistency  | Indirectness | Imprecision                 | Other considerations | Cross-education | Usual care | Relative (95% CI)                              | Absolute (95% CI) |                  |            |
| 1                                                                                                                                   |                  |              |                |              |                             |                      |                 |            |                                                |                   |                  |            |
| <b>Balance - One-leg standing balance, eyes open (better indicated by higher values) – 5 weeks post-op</b>                          |                  |              |                |              |                             |                      |                 |            |                                                |                   |                  |            |
| 1<br>Zult 2018                                                                                                                      | randomised trial | serious      | not assessable | not serious  | very serious <sup>a,b</sup> | none                 | 22              | 21         | SMD 0.43 lower<br>(1.04 lower to 0.17 higher)  |                   | ⊕○○○<br>Very low | IMPORTANT  |
| <b>Balance - One-leg standing balance, eyes closed (better indicated by higher values) – 5 weeks post-op</b>                        |                  |              |                |              |                             |                      |                 |            |                                                |                   |                  |            |
| 1<br>Zult 2018                                                                                                                      | randomised trial | serious      | not assessable | not serious  | very serious <sup>a,b</sup> | none                 | 22              | 21         | SMD 0.35 higher<br>(0.25 lower to 0.96 higher) |                   | ⊕○○○<br>Very low | IMPORTANT  |
| <b>Balance - Star-excursion balance test, composite score (% leg length) (better indicated by higher values) – 5 weeks post-op</b>  |                  |              |                |              |                             |                      |                 |            |                                                |                   |                  |            |
| 1<br>Zult 2018                                                                                                                      | randomised trial | serious      | not assessable | not serious  | very serious <sup>a,b</sup> | none                 | 22              | 21         | SMD 0.33 lower<br>(0.93 lower to 0.28 higher)  |                   | ⊕○○○<br>Very low | IMPORTANT  |
| <b>Balance - One-leg standing balance, eyes open (better indicated by higher values) – 3 months post-op</b>                         |                  |              |                |              |                             |                      |                 |            |                                                |                   |                  |            |
| 1<br>Zult 2018                                                                                                                      | randomised trial | serious      | not assessable | not serious  | very serious <sup>a,b</sup> | none                 | 22              | 21         | SMD 0<br>(0.6 lower to 0.6 higher)             |                   | ⊕○○○<br>Very low | IMPORTANT  |
| <b>Balance - One-leg standing balance, eyes closed (better indicated by higher values) – 3 months post-op</b>                       |                  |              |                |              |                             |                      |                 |            |                                                |                   |                  |            |
| 1<br>Zult 2018                                                                                                                      | randomised trial | serious      | not assessable | not serious  | very serious <sup>a,b</sup> | none                 | 22              | 21         | SMD 0.15 higher<br>(0.44 lower to 0.75 higher) |                   | ⊕○○○<br>Very low | IMPORTANT  |
| <b>Balance - Star-excursion balance test, composite score (% leg length) (better indicated by higher values) – 3 months post-op</b> |                  |              |                |              |                             |                      |                 |            |                                                |                   |                  |            |
| 1<br>Zult 2018                                                                                                                      | randomised trial | serious      | not assessable | not serious  | very serious <sup>a,b</sup> | none                 | 22              | 21         | SMD 0.49 lower<br>(1.1 lower to 0.12 higher)   |                   | ⊕○○○<br>Very low | IMPORTANT  |
| <b>Balance - One-leg standing balance, eyes open (better indicated by higher values) – 6 months post-op</b>                         |                  |              |                |              |                             |                      |                 |            |                                                |                   |                  |            |
| 1<br>Zult 2018                                                                                                                      | randomised trial | serious      | not assessable | not serious  | very serious <sup>a,b</sup> | none                 | 22              | 21         | SMD 0<br>(0.6 lower to 0.6 higher)             |                   | ⊕○○○<br>Very low | IMPORTANT  |
| <b>Balance - One-leg standing balance, eyes closed (better indicated by higher values) – 6 months post-op</b>                       |                  |              |                |              |                             |                      |                 |            |                                                |                   |                  |            |
| 1<br>Zult 2018                                                                                                                      | randomised trial | serious      | not assessable | not serious  | very serious <sup>a,b</sup> | none                 | 22              | 21         | SMD 0.05 higher<br>(0.55 lower to 0.65 higher) |                   | ⊕○○○<br>Very low | IMPORTANT  |
| <b>Balance - Star-excursion balance test, composite score (% leg length) (better indicated by higher values) – 6 months post-op</b> |                  |              |                |              |                             |                      |                 |            |                                                |                   |                  |            |
| 1<br>Zult 2018                                                                                                                      | randomised trial | serious      | not assessable | not serious  | very serious <sup>a,b</sup> | none                 | 22              | 21         | SMD 0.33 lower<br>(0.93 lower to 0.28 higher)  |                   | ⊕○○○<br>Very low | IMPORTANT  |
| <b>Adverse events</b>                                                                                                               |                  |              |                |              |                             |                      |                 |            |                                                |                   |                  |            |
| Papandreou 2007                                                                                                                     |                  |              |                |              |                             |                      |                 |            | None reported                                  |                   |                  | CRITICAL   |
| Papandreou 2009                                                                                                                     |                  |              |                |              |                             |                      |                 |            | None reported                                  |                   |                  | CRITICAL   |
| Papandreou 2013                                                                                                                     |                  |              |                |              |                             |                      |                 |            | None reported                                  |                   |                  | CRITICAL   |
| Zult 2018                                                                                                                           |                  |              |                |              |                             |                      |                 |            | None reported                                  |                   |                  | CRITICAL   |
| Zult 2019                                                                                                                           |                  |              |                |              |                             |                      |                 |            | None reported                                  |                   |                  | CRITICAL   |
| Harput 2019                                                                                                                         |                  |              |                |              |                             |                      |                 |            | None reported                                  |                   |                  | CRITICAL   |
| Minshull 2021                                                                                                                       |                  |              |                |              |                             |                      |                 |            | None reported                                  |                   |                  | CRITICAL   |

CI: confidence interval; SMD: standardised mean difference

- a. Total participants <800
- b. 95% CI of an SMD extends > 0.5 points in either direction

## Core stability training versus no core stability training in rehabilitation after ACLR

Bibliography: Panchal 2017, Li 2019

| Certainty assessment                                                                                                                   |                  |              |                |              |                             |                      | No of patients |                   | Effect                                          |                   | Certainty | Importance |
|----------------------------------------------------------------------------------------------------------------------------------------|------------------|--------------|----------------|--------------|-----------------------------|----------------------|----------------|-------------------|-------------------------------------------------|-------------------|-----------|------------|
| No of studies                                                                                                                          | Study design     | Risk of bias | Inconsistency  | Indirectness | Imprecision                 | Other considerations | Core stability | No core stability | Relative (95% CI)                               | Absolute (95% CI) |           |            |
| <b>Range of motion (ROM)</b>                                                                                                           |                  |              |                |              |                             |                      |                |                   |                                                 |                   |           |            |
| 2                                                                                                                                      |                  |              |                |              |                             |                      |                |                   |                                                 |                   |           |            |
| <b>ROM (total range of motion improvement (°) measured by mobile application; better indicated by higher values) – 4 weeks post-op</b> |                  |              |                |              |                             |                      |                |                   |                                                 |                   |           |            |
| 1<br>Panchal 2017                                                                                                                      | randomised trial | serious      | not assessable | not serious  | very serious <sup>a,b</sup> | none                 | 30             | 30                | SMD 0.48 lower<br>(0.99 lower to 0.04 higher)   | ⊕○○○<br>Very low  |           | IMPORTANT  |
| <b>ROM - active knee flexion (better indicated by higher values) – 6 months post-op</b>                                                |                  |              |                |              |                             |                      |                |                   |                                                 |                   |           |            |
| 1<br>Li 2019                                                                                                                           | randomised trial | very serious | not assessable | not serious  | very serious <sup>a,b</sup> | none                 | 37             | 37                | SMD 4.33 higher<br>(3.48 higher to 5.18 higher) | ⊕○○○<br>Very low  |           | IMPORTANT  |
| <b>ROM - passive knee flexion (better indicated by higher values) – 6 months post-op</b>                                               |                  |              |                |              |                             |                      |                |                   |                                                 |                   |           |            |
| 1<br>Li 2019                                                                                                                           | randomised trial | very serious | not assessable | not serious  | very serious <sup>a,b</sup> | none                 | 37             | 37                | SMD 4.34 higher<br>(3.49 higher to 5.19 higher) | ⊕○○○<br>Very low  |           | IMPORTANT  |
| <b>Patient reported outcomes (PROM)</b>                                                                                                |                  |              |                |              |                             |                      |                |                   |                                                 |                   |           |            |
| 2                                                                                                                                      |                  |              |                |              |                             |                      |                |                   |                                                 |                   |           |            |
| <b>PROM - Lysholm score (better indicated by higher values) – 4 weeks post-op</b>                                                      |                  |              |                |              |                             |                      |                |                   |                                                 |                   |           |            |
| 1<br>Panchal 2017                                                                                                                      | randomised trial | very serious | not assessable | not serious  | very serious <sup>a,b</sup> | none                 | 30             | 30                | SMD 0.76 higher<br>(0.23 higher to 1.28 higher) | ⊕○○○<br>Very low  |           | CRITICAL   |
| <b>PROM - Tegner level (better indicated by higher values) – 4 weeks post-op</b>                                                       |                  |              |                |              |                             |                      |                |                   |                                                 |                   |           |            |
| 1<br>Panchal 2017                                                                                                                      | randomised trial | very serious | not assessable | not serious  | very serious <sup>a,b</sup> | none                 | 30             | 30                | SMD 0<br>(0.51 lower to 0.51 higher)            | ⊕○○○<br>Very low  |           | CRITICAL   |
| <b>PROM - Lysholm score (better indicated by higher values) – 6 months post-op</b>                                                     |                  |              |                |              |                             |                      |                |                   |                                                 |                   |           |            |
| 1<br>Li 2019                                                                                                                           | randomised trial | very serious | not assessable | not serious  | very serious <sup>a,b</sup> | none                 | 37             | 37                | SMD 1.68 higher<br>(1.14 higher to 2.21 higher) | ⊕○○○<br>Very low  |           | CRITICAL   |
| <b>Functional activities</b>                                                                                                           |                  |              |                |              |                             |                      |                |                   |                                                 |                   |           |            |
| 1                                                                                                                                      |                  |              |                |              |                             |                      |                |                   |                                                 |                   |           |            |
| <b>Functional - cadence (better indicated by higher values) – 6 months post-op</b>                                                     |                  |              |                |              |                             |                      |                |                   |                                                 |                   |           |            |
| 1<br>Li 2019                                                                                                                           | randomised trial | very serious | not assessable | not serious  | very serious <sup>a,b</sup> | none                 | 37             | 37                | SMD 2.28 higher<br>(1.68 higher to 2.87 higher) | ⊕○○○<br>Very low  |           | IMPORTANT  |
| <b>Functional - stride Length (better indicated by higher values) – 6 months post-op</b>                                               |                  |              |                |              |                             |                      |                |                   |                                                 |                   |           |            |
| 1<br>Li 2019                                                                                                                           | randomised trial | very serious | not assessable | not serious  | very serious <sup>a,b</sup> | none                 | 37             | 37                | SMD 1.38 higher<br>(0.87 higher to 1.89 higher) | ⊕○○○<br>Very low  |           | IMPORTANT  |
| <b>Functional - stride width (better indicated by lower values) – 6 months post-op</b>                                                 |                  |              |                |              |                             |                      |                |                   |                                                 |                   |           |            |
| 1<br>Li 2019                                                                                                                           | randomised trial | very serious | not assessable | not serious  | very serious <sup>a,b</sup> | none                 | 37             | 37                | SMD 1.48 lower<br>(2 lower to 0.97 lower)       | ⊕○○○<br>Very low  |           | IMPORTANT  |
| <b>Functional - gait speed (better indicated by higher values) – 6 months post-op</b>                                                  |                  |              |                |              |                             |                      |                |                   |                                                 |                   |           |            |
| 1<br>Li 2019                                                                                                                           | randomised trial | very serious | not assessable | not serious  | very serious <sup>a,b</sup> | none                 | 37             | 37                | SMD 1.89 higher<br>(1.33 higher to 2.44 higher) | ⊕○○○<br>Very low  |           | IMPORTANT  |
| <b>Functional - gait cycle (better indicated by lower values) – 6 months post-op</b>                                                   |                  |              |                |              |                             |                      |                |                   |                                                 |                   |           |            |
| 1<br>Li 2019                                                                                                                           | randomised trial | very serious | not assessable | not serious  | very serious <sup>a,b</sup> | none                 | 37             | 37                | SMD 1.05 lower<br>(1.54 lower to 0.56 lower)    | ⊕○○○<br>Very low  |           | IMPORTANT  |
| <b>Functional - stance phase time on affected side (better indicated by lower values) – 6 months post-op</b>                           |                  |              |                |              |                             |                      |                |                   |                                                 |                   |           |            |
| 1<br>Li 2019                                                                                                                           | randomised trial | very serious | not assessable | not serious  | very serious <sup>a,b</sup> | none                 | 37             | 37                | SMD 1.14 lower<br>(1.63 lower to 0.65 lower)    | ⊕○○○<br>Very low  |           | IMPORTANT  |
| <b>Functional - swing phase time on affected side (better indicated by higher values) – 6 months post-op</b>                           |                  |              |                |              |                             |                      |                |                   |                                                 |                   |           |            |

| Certainty assessment                                                                                 |                  |              |                |              |                              |                      | No of patients |                   | Effect                                          |                   | Certainty        | Importance |
|------------------------------------------------------------------------------------------------------|------------------|--------------|----------------|--------------|------------------------------|----------------------|----------------|-------------------|-------------------------------------------------|-------------------|------------------|------------|
| No of studies                                                                                        | Study design     | Risk of bias | Inconsistency  | Indirectness | Imprecision                  | Other considerations | Core stability | No core stability | Relative (95% CI)                               | Absolute (95% CI) |                  |            |
| 1<br>Li 2019                                                                                         | randomised trial | very serious | not assessable | not serious  | very serious <sup>a, b</sup> | none                 | 37             | 37                | SMD 0.9 higher<br>(0.42 higher to 1.38 higher)  |                   | ⊕○○○<br>Very low | IMPORTANT  |
| <b>Functional - hip peak reaction force (better indicated by higher values) – 6 months post-op</b>   |                  |              |                |              |                              |                      |                |                   |                                                 |                   |                  |            |
| 1<br>Li 2019                                                                                         | randomised trial | very serious | not assessable | not serious  | very serious <sup>a, b</sup> | none                 | 37             | 37                | SMD 0.71 higher<br>(0.24 higher to 1.18 higher) |                   | ⊕○○○<br>Very low | IMPORTANT  |
| <b>Functional - knee peak reaction force (better indicated by higher values) – 6 months post-op</b>  |                  |              |                |              |                              |                      |                |                   |                                                 |                   |                  |            |
| 1<br>Li 2019                                                                                         | randomised trial | very serious | not assessable | not serious  | very serious <sup>a, b</sup> | none                 | 37             | 37                | SMD 0.6 higher<br>(0.13 higher to 1.07 higher)  |                   | ⊕○○○<br>Very low | IMPORTANT  |
| <b>Functional - ankle peak reaction force (better indicated by higher values) – 6 months post-op</b> |                  |              |                |              |                              |                      |                |                   |                                                 |                   |                  |            |
| 1<br>Li 2019                                                                                         | randomised trial | very serious | not assessable | not serious  | very serious <sup>a, b</sup> | none                 | 37             | 37                | SMD 1.54 higher<br>(1.02 higher to 2.07 higher) |                   | ⊕○○○<br>Very low | IMPORTANT  |
| <b>Pain</b>                                                                                          |                  |              |                |              |                              |                      |                |                   |                                                 |                   |                  |            |
| 1                                                                                                    |                  |              |                |              |                              |                      |                |                   |                                                 |                   |                  |            |
| <b>Pain – improvement in pain score VAS (better indicated by higher values) – 4 weeks post-op</b>    |                  |              |                |              |                              |                      |                |                   |                                                 |                   |                  |            |
| 1<br>Panchal 2017                                                                                    | randomised trial | serious      | not assessable | not serious  | very serious <sup>a, b</sup> | none                 | 30             | 30                | SMD 0.21 higher<br>(0.29 lower to 0.72 higher)  |                   | ⊕○○○<br>Very low | CRITICAL   |
| <b>Adverse events</b>                                                                                |                  |              |                |              |                              |                      |                |                   |                                                 |                   |                  |            |
| Panchal 2017                                                                                         |                  |              |                |              |                              |                      |                |                   | None reported                                   |                   |                  | CRITICAL   |
| Li 2019                                                                                              |                  |              |                |              |                              |                      |                |                   | None reported                                   |                   |                  | CRITICAL   |

CI: confidence interval; SMD: standardised mean difference

- a. Total participants <800  
b. 95% CI of an SMD extends > 0.5 points in either direction

## Aquatic therapy versus no aquatic therapy in rehabilitation after ACLR

Bibliography: Tovin 1994, Zamarioli 2008, Peultier-Celli 2017

| Certainty assessment                                                                               |                  |              |                |              |                             |                      | No of patients  |                    | Effect                                                                               |                   | Certainty | Importance |
|----------------------------------------------------------------------------------------------------|------------------|--------------|----------------|--------------|-----------------------------|----------------------|-----------------|--------------------|--------------------------------------------------------------------------------------|-------------------|-----------|------------|
| No of studies                                                                                      | Study design     | Risk of bias | Inconsistency  | Indirectness | Imprecision                 | Other considerations | Aquatic therapy | No aquatic therapy | Relative (95% CI)                                                                    | Absolute (95% CI) |           |            |
| <b>Strength</b>                                                                                    |                  |              |                |              |                             |                      |                 |                    |                                                                                      |                   |           |            |
| 1                                                                                                  |                  |              |                |              |                             |                      |                 |                    |                                                                                      |                   |           |            |
| <b>Strength - Quadriceps ISOM 85° LSI% (better indicated by higher values) – 2 months post-op</b>  |                  |              |                |              |                             |                      |                 |                    |                                                                                      |                   |           |            |
| 1<br>Tovin 1994                                                                                    | randomised trial | very serious | not assessable | not serious  | very serious <sup>a,b</sup> | none                 | 10              | 9                  | SMD 0.02 lower<br>(0.92 lower to 0.88 higher)                                        | ⊕○○○<br>Very low  |           | CRITICAL   |
| <b>Strength - Quadriceps CON 90°/s LSI% (better indicated by higher values) – 2 months post-op</b> |                  |              |                |              |                             |                      |                 |                    |                                                                                      |                   |           |            |
| 1<br>Tovin 1994                                                                                    | randomised trial | very serious | not assessable | not serious  | very serious <sup>a,b</sup> | none                 | 10              | 9                  | SMD 0.28 lower<br>(1.19 lower to 0.62 higher)                                        | ⊕○○○<br>Very low  |           | CRITICAL   |
| <b>Strength - Hamstring ISOM 85° LSI% (better indicated by higher values) – 2 months post-op</b>   |                  |              |                |              |                             |                      |                 |                    |                                                                                      |                   |           |            |
| 1<br>Tovin 1994                                                                                    | randomised trial | very serious | not assessable | not serious  | very serious <sup>a,b</sup> | none                 | 10              | 9                  | SMD 0.13 lower<br>(1.04 lower to 0.77 higher)                                        | ⊕○○○<br>Very low  |           | CRITICAL   |
| <b>Strength - Hamstring CON 90°/s LSI% (better indicated by higher values) – 2 months post-op</b>  |                  |              |                |              |                             |                      |                 |                    |                                                                                      |                   |           |            |
| 1<br>Tovin 1994                                                                                    | randomised trial | very serious | not assessable | not serious  | very serious <sup>a,b</sup> | none                 | 10              | 9                  | SMD 1.14 lower<br>(2.13 lower to 0.15 lower)                                         | ⊕○○○<br>Very low  |           | CRITICAL   |
| <b>Range of motion (ROM)</b>                                                                       |                  |              |                |              |                             |                      |                 |                    |                                                                                      |                   |           |            |
| 3                                                                                                  |                  |              |                |              |                             |                      |                 |                    |                                                                                      |                   |           |            |
| <b>ROM - knee flexion (better indicated by higher values) – 2 months post-op</b>                   |                  |              |                |              |                             |                      |                 |                    |                                                                                      |                   |           |            |
| 1<br>Zamarioli 2008                                                                                | randomised trial | very serious | not assessable | not serious  | very serious <sup>a,b</sup> | none                 | 5               | 5                  | SMD 0.09 lower<br>(1.33 lower to 1.15 higher)                                        | ⊕○○○<br>Very low  |           | CRITICAL   |
| Tovin 1994                                                                                         | randomised trial | very serious | not assessable | not serious  | very serious <sup>a,c</sup> | none                 | 10              | 10                 | The authors reported no statistically significant difference between the two groups. | ⊕○○○<br>Very low  |           | CRITICAL   |
| Peultier-Celli 2017                                                                                | randomised trial | serious      | not assessable | not serious  | very serious <sup>a,c</sup> | none                 | 32              | 35                 | The authors reported no statistically significant difference between the two groups. | ⊕○○○<br>Very low  |           | CRITICAL   |
| <b>ROM - knee extension (better indicated by lower values) – 2 months post-op</b>                  |                  |              |                |              |                             |                      |                 |                    |                                                                                      |                   |           |            |
| 1<br>Zamarioli 2008                                                                                | randomised trial | very serious | not assessable | not serious  | very serious <sup>a,b</sup> | none                 | 5               | 5                  | SMD 0.8 higher<br>(0.52 lower to 2.12 higher)                                        | ⊕○○○<br>Very low  |           | CRITICAL   |
| Tovin 1994                                                                                         | randomised trial | very serious | not assessable | not serious  | very serious <sup>a,c</sup> | none                 | 10              | 10                 | The authors reported no statistically significant difference between the two groups. | ⊕○○○<br>Very low  |           | CRITICAL   |
| Peultier-Celli 2017                                                                                | randomised trial | serious      | not assessable | not serious  | very serious <sup>a,c</sup> | none                 | 32              | 35                 | The authors reported no statistically significant difference between the two groups. | ⊕○○○<br>Very low  |           | CRITICAL   |
| <b>Patient reported outcomes (PROM)</b>                                                            |                  |              |                |              |                             |                      |                 |                    |                                                                                      |                   |           |            |
| 2                                                                                                  |                  |              |                |              |                             |                      |                 |                    |                                                                                      |                   |           |            |
| <b>PROM – Lysholm scale (better indicated by higher values) – 2 months post-op</b>                 |                  |              |                |              |                             |                      |                 |                    |                                                                                      |                   |           |            |
| 1<br>Tovin 1994                                                                                    | randomised trial | very serious | not assessable | not serious  | very serious <sup>a,b</sup> | none                 | 10              | 9                  | SMD 1.04 higher<br>(0.06 higher to 2.01 higher)                                      | ⊕○○○<br>Very low  |           | CRITICAL   |
| <b>PROM – Lysholm scale – 6 months post-op</b>                                                     |                  |              |                |              |                             |                      |                 |                    |                                                                                      |                   |           |            |
| Peultier-Celli 2017                                                                                | randomised trial | very serious | not assessable | not serious  | very serious <sup>a,c</sup> | none                 | 32              | 35                 | The authors reported no statistically significant difference between the two groups. | ⊕○○○<br>Very low  |           | CRITICAL   |
| <b>PROM – IKDC scale – 6 months post-op</b>                                                        |                  |              |                |              |                             |                      |                 |                    |                                                                                      |                   |           |            |

| Certainty assessment                                                                           |                  |              |                |              |                             |                      | No of patients  |                    | Effect                                                                               |                   | Certainty        | Importance |
|------------------------------------------------------------------------------------------------|------------------|--------------|----------------|--------------|-----------------------------|----------------------|-----------------|--------------------|--------------------------------------------------------------------------------------|-------------------|------------------|------------|
| No of studies                                                                                  | Study design     | Risk of bias | Inconsistency  | Indirectness | Imprecision                 | Other considerations | Aquatic therapy | No aquatic therapy | Relative (95% CI)                                                                    | Absolute (95% CI) |                  |            |
| Peultier-Celli 2017                                                                            | randomised trial | very serious | not assessable | not serious  | very serious <sup>a,c</sup> | none                 | 32              | 35                 | The authors reported no statistically significant difference between the two groups. |                   | ⊕○○○<br>Very low | CRITICAL   |
| <b>PROM – KOOS scale – 6 months post-op</b>                                                    |                  |              |                |              |                             |                      |                 |                    |                                                                                      |                   |                  |            |
| Peultier-Celli 2017                                                                            | randomised trial | very serious | not assessable | not serious  | very serious <sup>a,c</sup> | none                 | 32              | 35                 | The authors reported no statistically significant difference between the two groups. |                   | ⊕○○○<br>Very low | CRITICAL   |
| <b>Functional activities</b>                                                                   |                  |              |                |              |                             |                      |                 |                    |                                                                                      |                   |                  |            |
| 1                                                                                              |                  |              |                |              |                             |                      |                 |                    |                                                                                      |                   |                  |            |
| <b>Functional - 6 minutes' walk test (better indicated by higher values) – 1 month post-op</b> |                  |              |                |              |                             |                      |                 |                    |                                                                                      |                   |                  |            |
| 1 Peultier-Celli 2017                                                                          | randomised trial | serious      | not assessable | not serious  | serious <sup>a</sup>        | none                 | 32              | 35                 | SMD 0.56 higher (0.07 higher to 1.04 higher)                                         |                   | ⊕⊕○○<br>Low      | IMPORTANT  |
| <b>Functional - 6 minutes' walk test – 6 month post-op</b>                                     |                  |              |                |              |                             |                      |                 |                    |                                                                                      |                   |                  |            |
| Peultier-Celli 2017                                                                            | randomised trial | serious      | not assessable | not serious  | very serious <sup>a,c</sup> | none                 | 32              | 35                 | The authors reported no statistically significant difference between the two groups. |                   | ⊕○○○<br>Very low | IMPORTANT  |
| <b>Laxity</b>                                                                                  |                  |              |                |              |                             |                      |                 |                    |                                                                                      |                   |                  |            |
| 1                                                                                              |                  |              |                |              |                             |                      |                 |                    |                                                                                      |                   |                  |            |
| <b>Laxity - laxity – 2 months post-op</b>                                                      |                  |              |                |              |                             |                      |                 |                    |                                                                                      |                   |                  |            |
| 1 Tovin 1994                                                                                   | randomised trial | very serious | not assessable | not serious  | very serious <sup>a,c</sup> | none                 | 10              | 10                 | The authors reported no statistically significant difference between the two groups. |                   | ⊕○○○<br>Very low | CRITICAL   |
| <b>Proprioception</b>                                                                          |                  |              |                |              |                             |                      |                 |                    |                                                                                      |                   |                  |            |
|                                                                                                |                  |              |                |              |                             |                      |                 |                    |                                                                                      |                   |                  |            |
| <b>Proprioception – repositioning error – 2 months post-op</b>                                 |                  |              |                |              |                             |                      |                 |                    |                                                                                      |                   |                  |            |
| Peultier-Celli 2017                                                                            | randomised trial | serious      | not assessable | not serious  | very serious <sup>a,c</sup> | none                 | 32              | 35                 | The authors reported no statistically significant difference between the two groups. |                   | ⊕○○○<br>Very low | IMPORTANT  |
| <b>Pain</b>                                                                                    |                  |              |                |              |                             |                      |                 |                    |                                                                                      |                   |                  |            |
| 1                                                                                              |                  |              |                |              |                             |                      |                 |                    |                                                                                      |                   |                  |            |
| <b>pain – pain VAS (better indicated by lower values) – 2 months post-op</b>                   |                  |              |                |              |                             |                      |                 |                    |                                                                                      |                   |                  |            |
| 1 Zamaroli 2008                                                                                | randomised trial | very serious | not assessable | not serious  | very serious <sup>a,b</sup> | none                 | 5               | 5                  | SMD 0.96 lower (2.31 lower to 0.39 higher)                                           |                   | ⊕○○○<br>Very low | CRITICAL   |
| Peultier-Celli 2017                                                                            | randomised trial | very serious | not assessable | not serious  | very serious <sup>a,c</sup> | none                 | 32              | 35                 | The authors reported no statistically significant difference between the two groups. |                   | ⊕○○○<br>Very low | CRITICAL   |
| <b>Balance</b>                                                                                 |                  |              |                |              |                             |                      |                 |                    |                                                                                      |                   |                  |            |
| 1                                                                                              |                  |              |                |              |                             |                      |                 |                    |                                                                                      |                   |                  |            |
| <b>Balance - balance (sway path) (better indicated by lower values) – 2 months post-op</b>     |                  |              |                |              |                             |                      |                 |                    |                                                                                      |                   |                  |            |
| 1 Peultier-Celli 2017                                                                          | randomised trial | serious      | not assessable | not serious  | serious <sup>a</sup>        | none                 | 32              | 35                 | SMD 0.2 higher (0.28 lower to 0.68 higher)                                           |                   | ⊕⊕○○<br>Low      | IMPORTANT  |
| <b>Balance - balance (sway path) (better indicated by lower values) – 6 months post-op</b>     |                  |              |                |              |                             |                      |                 |                    |                                                                                      |                   |                  |            |
| 1 Peultier-Celli 2017                                                                          | randomised trial | serious      | not assessable | not serious  | serious <sup>a</sup>        | none                 | 32              | 35                 | SMD 0.23 higher (0.25 lower to 0.71 higher)                                          |                   | ⊕⊕○○<br>Low      | IMPORTANT  |
| <b>Balance - balance (area) (better indicated by lower values) – 2 months post-op</b>          |                  |              |                |              |                             |                      |                 |                    |                                                                                      |                   |                  |            |
| 1 Peultier-Celli 2017                                                                          | randomised trial | serious      | not assessable | not serious  | serious <sup>a</sup>        | none                 | 32              | 35                 | SMD 0.13 lower (0.61 lower to 0.35 higher)                                           |                   | ⊕⊕○○<br>Low      | IMPORTANT  |

| Certainty assessment                                                                              |                  |              |                |              |                             |                      | No of patients  |                    | Effect                                                                               |                   | Certainty        | Importance |
|---------------------------------------------------------------------------------------------------|------------------|--------------|----------------|--------------|-----------------------------|----------------------|-----------------|--------------------|--------------------------------------------------------------------------------------|-------------------|------------------|------------|
| No of studies                                                                                     | Study design     | Risk of bias | Inconsistency  | Indirectness | Imprecision                 | Other considerations | Aquatic therapy | No aquatic therapy | Relative (95% CI)                                                                    | Absolute (95% CI) |                  |            |
| <b>Balance - balance (area) (better indicated by lower values) – 6 months post-op</b>             |                  |              |                |              |                             |                      |                 |                    |                                                                                      |                   |                  |            |
| 1<br>Peultier-Celli 2017                                                                          | randomised trial | serious      | not assessable | not serious  | serious <sup>a</sup>        | none                 | 32              | 35                 | SMD 0.12 lower<br>(0.6 lower to 0.36 higher)                                         |                   | ⊕⊕○○<br>Low      | IMPORTANT  |
| <b>Balance - somatosensory contribution (better indicated by lower values) – 2 months post-op</b> |                  |              |                |              |                             |                      |                 |                    |                                                                                      |                   |                  |            |
| 1<br>Peultier-Celli 2017                                                                          | randomised trial | serious      | not assessable | not serious  | serious <sup>a</sup>        | none                 | 32              | 35                 | SMD 0.22 lower<br>(0.7 lower to 0.27 higher)                                         |                   | ⊕⊕○○<br>Low      | IMPORTANT  |
| <b>Balance - somatosensory contribution (better indicated by lower values) – 6 months post-op</b> |                  |              |                |              |                             |                      |                 |                    |                                                                                      |                   |                  |            |
| 1<br>Peultier-Celli 2017                                                                          | randomised trial | serious      | not assessable | not serious  | serious <sup>a</sup>        | none                 | 32              | 35                 | SMD 0.66 lower<br>(1.15 lower to 0.17 lower)                                         |                   | ⊕⊕○○<br>Low      | IMPORTANT  |
| <b>balance - visual contribution (better indicated by lower values) – 2 months post-op</b>        |                  |              |                |              |                             |                      |                 |                    |                                                                                      |                   |                  |            |
| 1<br>Peultier-Celli 2017                                                                          | randomised trial | serious      | not assessable | not serious  | serious <sup>a</sup>        | none                 | 32              | 35                 | SMD 0.21 lower<br>(0.69 lower to 0.28 higher)                                        |                   | ⊕⊕○○<br>Low      | IMPORTANT  |
| <b>Balance - visual contribution (better indicated by lower values) – 6 months post-op</b>        |                  |              |                |              |                             |                      |                 |                    |                                                                                      |                   |                  |            |
| 1<br>Peultier-Celli 2017                                                                          | randomised trial | serious      | not assessable | not serious  | serious <sup>a</sup>        | none                 | 32              | 35                 | SMD 0.43 lower<br>(0.92 lower to 0.05 higher)                                        |                   | ⊕⊕○○<br>Low      | IMPORTANT  |
| <b>Balance - vestibular contribution (better indicated by lower values) – 2 months post-op</b>    |                  |              |                |              |                             |                      |                 |                    |                                                                                      |                   |                  |            |
| 1<br>Peultier-Celli 2017                                                                          | randomised trial | serious      | not assessable | not serious  | serious <sup>a</sup>        | none                 | 32              | 35                 | SMD 0.04 lower<br>(0.52 lower to 0.44 higher)                                        |                   | ⊕⊕○○<br>Low      | IMPORTANT  |
| <b>Balance - vestibular contribution (better indicated by lower values) – 6 months post-op</b>    |                  |              |                |              |                             |                      |                 |                    |                                                                                      |                   |                  |            |
| 1<br>Peultier-Celli 2017                                                                          | randomised trial | serious      | not assessable | not serious  | serious <sup>a</sup>        | none                 | 32              | 35                 | SMD 0.25 lower<br>(0.73 lower to 0.23 higher)                                        |                   | ⊕⊕○○<br>Low      | IMPORTANT  |
| <b>Atrophy</b>                                                                                    |                  |              |                |              |                             |                      |                 |                    |                                                                                      |                   |                  |            |
| 2                                                                                                 |                  |              |                |              |                             |                      |                 |                    |                                                                                      |                   |                  |            |
| <b>Atrophy - thigh circumference (better indicated by higher values) – 2 months post-op</b>       |                  |              |                |              |                             |                      |                 |                    |                                                                                      |                   |                  |            |
| 1<br>Zamarioli 2008                                                                               | randomised trial | very serious | not assessable | not serious  | very serious <sup>a,b</sup> | none                 | 5               | 5                  | SMD 0.68 lower<br>(1.98 lower to 0.62 higher)                                        |                   | ⊕○○○<br>Very low | CRITICAL   |
| Tovin 1994                                                                                        | randomised trial | very serious | not assessable | not serious  | very serious <sup>a,c</sup> | none                 | 10              | 10                 | The authors reported no statistically significant difference between the two groups. |                   | ⊕○○○<br>Very low | CRITICAL   |
| <b>Swelling</b>                                                                                   |                  |              |                |              |                             |                      |                 |                    |                                                                                      |                   |                  |            |
| 2                                                                                                 |                  |              |                |              |                             |                      |                 |                    |                                                                                      |                   |                  |            |
| <b>Swelling - mid-patella circumference (better indicated by lower values) – 2 months post-op</b> |                  |              |                |              |                             |                      |                 |                    |                                                                                      |                   |                  |            |
| 1<br>Zamarioli 2008                                                                               | randomised trial | very serious | not assessable | not serious  | very serious <sup>a,b</sup> | none                 | 5               | 5                  | SMD 0.12 lower<br>(1.36 lower to 1.12 higher)                                        |                   | ⊕○○○<br>Very low | CRITICAL   |
| Tovin 1994                                                                                        | randomised trial | very serious | not assessable | not serious  | very serious <sup>a,c</sup> | none                 | 10              | 10                 | The authors reported no statistically significant difference between the two groups. |                   | ⊕○○○<br>Very low | CRITICAL   |
| <b>Adverse events</b>                                                                             |                  |              |                |              |                             |                      |                 |                    |                                                                                      |                   |                  |            |
| Tovin 1994                                                                                        |                  |              |                |              |                             |                      |                 |                    | None reported                                                                        |                   |                  | CRITICAL   |
| Zamarioli 2008                                                                                    |                  |              |                |              |                             |                      |                 |                    | None reported                                                                        |                   |                  | CRITICAL   |
| Peultier-Celli 2017                                                                               |                  |              |                |              |                             |                      |                 |                    | None reported                                                                        |                   |                  | CRITICAL   |

CI: confidence interval; SMD: standardised mean difference

VAS: Visual Analog Scale;

- a. Total participants <800
- b. 95% CI of an SMD extends > 0.5 points in either direction
- c. Not reporting results or SDs

## Recommendations level of agreement

Scoring sheet Aspetar ACL rehabilitation guideline.

Rate each statement with a whole number out of 7. Write any comments in the dedicated box only if you want.

All statements need a score unless you feel it isn't appropriate for you to answer (check the "I have no opinion" box in that case).

|   | Recommendation                                                                                                                                                                                                                                                                                                                                                                                                                                                      | Score 0-100%<br>Mean (95% CI) | Comments                                                                                                                                                                                                                                                                                                                                                                                                                                                                                                                                                                                                                                                                                                                                                                                                         |
|---|---------------------------------------------------------------------------------------------------------------------------------------------------------------------------------------------------------------------------------------------------------------------------------------------------------------------------------------------------------------------------------------------------------------------------------------------------------------------|-------------------------------|------------------------------------------------------------------------------------------------------------------------------------------------------------------------------------------------------------------------------------------------------------------------------------------------------------------------------------------------------------------------------------------------------------------------------------------------------------------------------------------------------------------------------------------------------------------------------------------------------------------------------------------------------------------------------------------------------------------------------------------------------------------------------------------------------------------|
| 1 | <b>Pre-operative</b> rehabilitation might improve post-operative quadriceps strength, knee range of motion, and may decrease the time to return to sport. We recommend at least one visit to ensure that there is adequate voluntary muscle activation and no flexion contracture that may require further pre-operative visits, and to educate the patient regarding the post-operative rehabilitation course.                                                     | <b>96.06</b> (92.53 to 99.59) | Agree, develop good strength capacity baseline as tolerated, with biased exercises to focused on existing hip, foot and ankle motor and strength deficits. Education on the key accessory exercises that can be started immediately post op may help exercise quality and patterning.                                                                                                                                                                                                                                                                                                                                                                                                                                                                                                                            |
| 2 | <b>Unsupervised exercise</b> execution might be followed by patients after ACLR who cannot afford supervised rehabilitation, have reduced access to physiotherapy, or have high motivation and are compliant to perform their rehabilitation independently. Irrespective, patients should have their programs individually prescribed and be monitored regarding the execution of the rehabilitation protocol and to ensure the progression without adverse events. | <b>84.69</b> (76.87 to 92.52) | <p>I think unsupervised exercise execution (UEE) can benefit depends on the patients. Patients who have experience in exercising on daily base with high body awareness can be considered UEE, however those who are not can be very dangerous for them. So, I would not recommend UEE in general unless they are educated well in exercising.</p> <p>Agree, if affordable, if not videos and clear explanations required with a focus on key exercises or main deficit to be targeted.</p> <p>This is a rehabilitation expertise guidance and strategic decision, cannot comment on this as a surgeon since I have no literature knowledge or benchmark data on this topic.</p> <p>I feel that if this is the case, non-operative treatment should be considered the best treatment option (non-compliant).</p> |
| 3 | The <b>duration of the rehabilitation</b> protocol is individual-specific and depends on the patient demonstrating their ability to safely return to their pre-injury activity level (criteria-based). Accelerated timelines under the right conditions can be used                                                                                                                                                                                                 | <b>97.04</b> (94.80 to 99.28) | The biological component for graft maturation should be a priority. Afterwards, the dynamic component can be used for progression.                                                                                                                                                                                                                                                                                                                                                                                                                                                                                                                                                                                                                                                                               |

|   |                                                                                                                                                                                                                                                       |                               |                                                                                                                                                                                                                                                                                                                                                                                                                                                                                                                                                                                                                                                                                                                                                                                                                                                                                                                                                                                                                                                                                                                                                                                                                                                                                                                                                                                                                                                                                                                                                                                                                                                                                                                                                                                                            |
|---|-------------------------------------------------------------------------------------------------------------------------------------------------------------------------------------------------------------------------------------------------------|-------------------------------|------------------------------------------------------------------------------------------------------------------------------------------------------------------------------------------------------------------------------------------------------------------------------------------------------------------------------------------------------------------------------------------------------------------------------------------------------------------------------------------------------------------------------------------------------------------------------------------------------------------------------------------------------------------------------------------------------------------------------------------------------------------------------------------------------------------------------------------------------------------------------------------------------------------------------------------------------------------------------------------------------------------------------------------------------------------------------------------------------------------------------------------------------------------------------------------------------------------------------------------------------------------------------------------------------------------------------------------------------------------------------------------------------------------------------------------------------------------------------------------------------------------------------------------------------------------------------------------------------------------------------------------------------------------------------------------------------------------------------------------------------------------------------------------------------------|
|   | without adverse events. Specific criteria should be used to progress rehabilitation mindful of minimum time requirements for graft protection and healing.                                                                                            |                               |                                                                                                                                                                                                                                                                                                                                                                                                                                                                                                                                                                                                                                                                                                                                                                                                                                                                                                                                                                                                                                                                                                                                                                                                                                                                                                                                                                                                                                                                                                                                                                                                                                                                                                                                                                                                            |
| 4 | There is no additional benefit for pain, range of motion, or swelling in using <b>continuous passive motion</b> compared to active motion exercises. We recommend against using it in the rehabilitation protocol as it is time-consuming and costly. | <b>75.51</b> (64.97 to 86.05) | <p>You may be right that it may be costly. However, sometimes we need this controlled early motion, and the patient is not able due to preoperative nerve block. So sometimes and if we rely only on immediate active motion we may lose the beneficial effects of (any kind of) motion due to inability of patients to actively move immediately. And in addition to NMES that you suggest to avoid atrophy (and I agree), the motion also offers additional advantage (except from the avoidance of atrophy) to the whole nutrition of the joint and cartilage due to diffusion. Finally, motion may help to avoid DVT (to be honest I am not aware for any evidence regarding correlation of CPM to avoid DVT). In general, we don't like immobilized patients post op but sometimes it happens due to nerve block as anesthesia.</p> <p>As long as CPM does not force to exceed one's ROM limit, I would definitely use it.</p> <p>From an ROM perspective, in some cases, I feel it can be beneficial for patients that are very guarded/ protective. Graded CPM can help / develop trust in knee movement i.e Flexion / Extension. In turn may help with desensitization.</p> <p>For isolated ACL, agree. However, in case of combined cartilage work, CPM is welcomed while active exercises can be initially contra-indicated.</p> <p>Should be used in exceptional circumstances.</p> <p>It may be beneficial in the very early stages, in the first day or so post-op. However, active motion exercises should be initiated as soon as pain allows.</p> <p>I have no experience.</p> <p>Somewhat disagree just because of previous emphasis on early CPM. No real clinical justification for the selection.</p> <p>I think it has a role in the immediate postoperative period (0-72 hours).</p> |
| 5 | <b>Cryotherapy</b> can be applied inexpensively, it is easy to use, has a high level of patient satisfaction, and is rarely associated with adverse events, therefore it is justified in the early phase of postoperative                             | <b>97.04</b> (94.80 to 99.28) |                                                                                                                                                                                                                                                                                                                                                                                                                                                                                                                                                                                                                                                                                                                                                                                                                                                                                                                                                                                                                                                                                                                                                                                                                                                                                                                                                                                                                                                                                                                                                                                                                                                                                                                                                                                                            |

|    |                                                                                                                                                                                                                                                                                                                                                                                                                     |                                |                                                                                                                                                                                                                                                                                                                            |
|----|---------------------------------------------------------------------------------------------------------------------------------------------------------------------------------------------------------------------------------------------------------------------------------------------------------------------------------------------------------------------------------------------------------------------|--------------------------------|----------------------------------------------------------------------------------------------------------------------------------------------------------------------------------------------------------------------------------------------------------------------------------------------------------------------------|
|    | management after ACLR. However, patients should be educated on safe ice application to avoid injury. Compressive cryotherapy, if available, might be more effective than cryotherapy alone.                                                                                                                                                                                                                         |                                |                                                                                                                                                                                                                                                                                                                            |
| 6  | We recommend the use of <b>Neuromuscular Electrical Stimulation (NMES)</b> in the very early phase after surgery to stimulate muscle activation or minimize the expected disuse atrophy. At the early phase, NMES might be used during functional activities to further facilitate strength gains.                                                                                                                  | <b>93.37</b> (90.55 to 96.18)  | Can be useful for some functional activities once timing of movement execution and stimulus is correct.                                                                                                                                                                                                                    |
| 7  | Low load <b>blood flow restriction</b> training might be used in addition to standard care in the early phase of rehabilitation to improve quadriceps and hamstring strength, particularly when patients have increased knee pain or cannot tolerate high knee joint loads. However, clinicians should be aware of the contraindications (e.g., cardiovascular disease, extensive swelling, skin irritation, etc.). | <b>92.61</b> (88.60 to 96.62)  | But timeline - wise, I might have some reservations to start BFR before 4 weeks postoperatively for DVT risk reasons.<br><br>Studies show that is a safe intervention with very low rates of complications and if any, very mild in nature.                                                                                |
| 8  | We don't recommend the use of vastus medialis trigger point <b>dry needling</b> in the very early rehabilitation phase due to increased risk of haemorrhage.                                                                                                                                                                                                                                                        | <b>67.62%</b> (52.53 to 82.71) | and risk of infection ( it has happened before )<br><br>Due to lack of evidence<br><br>Also I would not recommend it for the following reason: the uncertainty regarding the possible benefit what could be achieved with dry needling.<br><br>Very low risk of haemorrhage with dry needling<br><br>risks outweigh reward |
| 9  | <b>Whole-body vibration</b> might be used as an additional intervention to improve quadriceps strength and static balance but cannot replace conventional rehabilitation. Given the additional cost, and the reported complications (pain or swelling) when using this intervention, we suggest not including this in the rehabilitation protocol.                                                                  | <b>83.23</b> (75.19 to 91.27)  | I have no experience at all with this.<br><br>what is conventional rehabilitation and why can it not replace it?                                                                                                                                                                                                           |
| 10 | <b>Active knee motion</b> should begin immediately after surgery, mindful of any surgical instruction.                                                                                                                                                                                                                                                                                                              | <b>97.04</b> (94.80 to 99.28)  | Agree but only in isolated ACL cases. This can differ in case of combined surgical cartilage or complex meniscal work.                                                                                                                                                                                                     |

|    |                                                                                                                                                                                                                                                                                                                                          |                               |                                                                                                                                                                                                                                                                                                                                                                                                                                                                                  |
|----|------------------------------------------------------------------------------------------------------------------------------------------------------------------------------------------------------------------------------------------------------------------------------------------------------------------------------------------|-------------------------------|----------------------------------------------------------------------------------------------------------------------------------------------------------------------------------------------------------------------------------------------------------------------------------------------------------------------------------------------------------------------------------------------------------------------------------------------------------------------------------|
|    | Immobilization does not decrease pain and can lead to muscle atrophy which slows the recovery of function.                                                                                                                                                                                                                               |                               | Within surgical precautions.<br><br>Unless there is some underlying condition that the operated limb has to be immobilized as per surgeon restricted order.                                                                                                                                                                                                                                                                                                                      |
| 11 | <b>Early weight-bearing</b> (first week) should be done in a progressive, controlled manner, as tolerated by each patient, mindful of any surgical instructions.                                                                                                                                                                         | <b>95.57</b> (90.31 to 100)   | In isolated ACL rupture.<br><br>Again, if there are some restricted order from the surgeon we have to noticed it as well.                                                                                                                                                                                                                                                                                                                                                        |
| 12 | Patient may <b>start open kinetic chain</b> exercises in limited range of motion (90°-45° of knee flexion) from the 4th week after surgery without compromising knee stability. Clinicians and patients should monitor for anterior knee pain and adjust the knee load and the progression of strengthening accordingly.                 | <b>88.78</b> (84.16 to 93.39) | May be an idea to have a subsection in the protocols on dealing with anterior knee pain and how to progress.<br><br>Yes, for hamstring ACL's. No for BTB or Quad ACL's<br><br>Iso from 3 weeks 90, 70, 60. Arc 90-60 from 6 weeks. Full ROM from 8-10 weeks                                                                                                                                                                                                                      |
| 13 | <b>Isometric quadriceps</b> exercises including static quadriceps contractions and straight leg raises might have a small effect on faster knee flexion recovery, but not on quadriceps strength. They may be prescribed during the first 2 weeks after surgery without compromising the graft integrity.                                | <b>84.69</b> (76.17 to 93.21) | I would let my rehab expert guide me on that.<br><br>How would knee extension exercises increase speed of knee flexion recovery?<br><br>Including NMES, ROM dependent<br><br>Strongly agree for latter statement.                                                                                                                                                                                                                                                                |
| 14 | <b>Leg press</b> may be initiated as early as 3 weeks after surgery in patients with hamstring graft, using a functional pattern similar to a half squat (0°-45°) to improve quadriceps and hamstring strength, functional activities and subjective function. Anterior knee pain should be monitored, with load progressed accordingly. | <b>88.27</b> (84.26 to 92.27) | Agree, with correct tibia angles on the press.<br><br>Yes, if gracilis and semiT were harvested during the surgical graft preparation. No if only the semiT was taken.<br><br>Start isometrically first.                                                                                                                                                                                                                                                                         |
| 15 | <b>Early quadriceps eccentric</b> strengthening, using eccentric cycle or stepper ergometer, between 20°-60° of knee flexion, may be initiated at 3 weeks after surgery in patients with patellar tendon or hamstring autograft to improve quadriceps strength and hypertrophy without compromising graft integrity.                     | <b>82.74</b> (75.63 to 89.85) | Are there any evidence about any effect of early quad strengthening on PF pain and donor site in cases of BPTB autograft?<br><br>I would be cautious of eccentric work on BTB to avoid anterior knee pain at week 3 and somewhat graft / site integrity. Although, ACL load may be low at those ranges I may consider another exercise to isolate quads that may achieve more with less risk and allow for better ranges.<br><br>Starting at day 15 postop is too early for BTB. |

|    |                                                                                                                                                                                                                                                                                                                      |                               |                                                                                                                                                                                                                                                                                                                                                                                                                                                                                                                                                                                                                                                                   |
|----|----------------------------------------------------------------------------------------------------------------------------------------------------------------------------------------------------------------------------------------------------------------------------------------------------------------------|-------------------------------|-------------------------------------------------------------------------------------------------------------------------------------------------------------------------------------------------------------------------------------------------------------------------------------------------------------------------------------------------------------------------------------------------------------------------------------------------------------------------------------------------------------------------------------------------------------------------------------------------------------------------------------------------------------------|
|    |                                                                                                                                                                                                                                                                                                                      |                               | Could be even earlier if pain allows.                                                                                                                                                                                                                                                                                                                                                                                                                                                                                                                                                                                                                             |
| 16 | A combination of <b>closed and open kinetic chain</b> exercise may lead to significantly better quadriceps strength and earlier return to sports, without any increase in laxity, compared to closed chain alone. Monitor for anterior knee pain during open kinetic chain exercises and adjust loading accordingly. | <b>91.33</b> (85.82 to 96.83) | Agree, with exercises programmed at the correct rehabilitation timelines and overall load is calculated through the week to avoid anterior knee pain.<br><br>Depends on the time that these exercises start.                                                                                                                                                                                                                                                                                                                                                                                                                                                      |
| 17 | We suggest using <b>eccentric training</b> in combination with concentric training to elicit improved strength and functional outcomes after ACL surgery.                                                                                                                                                            | <b>91.84</b> (88.01 to 95.66) | Isokinetic eccentric training could potentially be utilized in our protocols as applicable to the patient.<br><br>What is the progression to eccentric strengthening?<br><br>I would let my rehab expert guide me on that. The surgical input can be beneficial on the time decision to start this training.                                                                                                                                                                                                                                                                                                                                                      |
| 18 | The exclusive use of <b>isokinetic training</b> for muscle strengthening after ACL surgery is not suggested. The combination of isotonic and isokinetic training appears to improve muscle strength more than these interventions in isolation.                                                                      | <b>90.48</b> (85.28 to 95.67) | I would be in favour of isokinetic training but the patient has to meet the right criteria for its use and mainly used towards end stage if required to clear quadriceps deficit. Can easily be overloaded between both gym work and isokinetic training. Clear structuring through the week is integral if being used.<br><br>That's hard to generalize. Some patients tend to respond more to one or the other (or combined). But I would let my rehab expert guide me on that. Individual monitoring is key and needs to guide un on how to progress depending on the biofeedback data and athlete response.<br><br>Time constraints make this very difficult. |
| 19 | <b>Motor control</b> and strength training are both integral parts of the rehabilitation and should be combined in the rehabilitation protocol to improve outcomes.                                                                                                                                                  | <b>98.52</b> (96.84 to 100)   | It should always be part of the training exercises.                                                                                                                                                                                                                                                                                                                                                                                                                                                                                                                                                                                                               |
| 20 | <b>Plyometric and agility training</b> may further improve subjective function and functional activities compared to usual care, without any increase in laxity or pain.                                                                                                                                             | <b>80%</b> (70.70 to 89.30)   | In the proper phase<br>Depends on what your doing the exercise for. If it is to increase confidence subjectively may get better results as long as baseline strength is there to support Coupled with Motor control and break down of the plyo movement will then help functional activities.<br><br>May increase pain<br><br>If done at the appropriate stage of healing and at the correct level of intensity                                                                                                                                                                                                                                                   |

|    |                                                                                                                                                                                                                                                                                                                                                                                                                                                                                    |                               |                                                                                                                                                                                                                                                                                                                                                                                                                                                                                                                                                                                              |
|----|------------------------------------------------------------------------------------------------------------------------------------------------------------------------------------------------------------------------------------------------------------------------------------------------------------------------------------------------------------------------------------------------------------------------------------------------------------------------------------|-------------------------------|----------------------------------------------------------------------------------------------------------------------------------------------------------------------------------------------------------------------------------------------------------------------------------------------------------------------------------------------------------------------------------------------------------------------------------------------------------------------------------------------------------------------------------------------------------------------------------------------|
| 21 | There are conflicting results on the effect of <b>cross-education</b> training program on quadriceps strength. However, we do not suggest the implementation of an exaggerated cross-education training program for strength gains in the injured leg. The uninjured limb's strength should be monitored and restored to baseline/optimal levels as indicated.                                                                                                                     | <b>83.74</b> (76.67 to 90.82) | <p>The uninjured leg should naturally increase in strength through the program. The rehab can focus on the uninjured leg towards mid-end stage due to the higher risk of opposite ACL occurrence in return to play post ACLR. Combining the patient's BW/ strength and power for their level of sport is important to ensure the all metrics are adequate.</p> <p>That's where my rehab expert needs to guide the patient on that based upon the player's pre-operative testing results. This looks very individual to me and hard to generalize.</p> <p>What is an exaggerated program?</p> |
| 22 | <b>Core stability</b> exercises might improve functional outcomes and subjective knee function and can be used as an addition to the rehabilitation protocol.                                                                                                                                                                                                                                                                                                                      | <b>92.61</b> (88.87 to 96.35) | <p>With particular focus on upper extremity sway during lower limb tasks. Making sure the core exercises is being completed because of a deficit or combined to improve a functional task.</p> <p>But obviously also gluteal exercises as a link</p>                                                                                                                                                                                                                                                                                                                                         |
| 23 | <b>Aquatic therapy</b> may be used in addition to the usual care during the early phase of rehabilitation to improve subjective knee function. We recommend that it is initiated 3-4 weeks postoperative, once the wound has completely healed.                                                                                                                                                                                                                                    | <b>96.06</b> (93.19 to 98.93) | <p>Once controlled and patient aware of knee flexion loads underwater.</p> <p>Big Fan.</p> <p>Possibly earlier?</p>                                                                                                                                                                                                                                                                                                                                                                                                                                                                          |
| 24 | We recommend that a patient does not attempt to drive before they can safely activate the brake in a simulated emergency. Typically, this will be at approximately 4 to 6 weeks after right-sided ACLR and approximately 2 to 3 weeks after left-sided ACLR.                                                                                                                                                                                                                       | <b>92.06</b> (87.28 to 96.85) | <p>Depends on the patient and their function at that stage.</p> <p>Functional test can be added x squat in x seconds</p>                                                                                                                                                                                                                                                                                                                                                                                                                                                                     |
| 25 | Despite an absence of research findings, we feel it is warranted to suggest criteria for <b>return to running</b> (where running has a volume and intensity to achieve cardiovascular adaptation):<br><br>95% knee flexion ROM<br>Full extension ROM<br>No effusion/trace of effusion<br>LSI>80% for quadriceps strength<br>LSI>80% eccentric impulse during Countermovement Jump<br>Pain-free aqua jogging and Alter G running<br>Pain-free repeated single leg hopping ("pogos") | <b>87.76</b> (83.06 to 92.45) | <p>What is the progression in aqua and alter g prior to running?</p>                                                                                                                                                                                                                                                                                                                                                                                                                                                                                                                         |

|    |                                                                                                                                                                                                                                                                                                                                                                                                                                                                                                                                                                                                                                                                                                                                                                                                                                                                                                                                                                                                                                                                                                                                                                                                                                                                                         |                               |                                                                                                                                                                                                                                                                                                                                                                                                                                                                                                                                                                                                                                                                                                                                                                                                                                                                                            |
|----|-----------------------------------------------------------------------------------------------------------------------------------------------------------------------------------------------------------------------------------------------------------------------------------------------------------------------------------------------------------------------------------------------------------------------------------------------------------------------------------------------------------------------------------------------------------------------------------------------------------------------------------------------------------------------------------------------------------------------------------------------------------------------------------------------------------------------------------------------------------------------------------------------------------------------------------------------------------------------------------------------------------------------------------------------------------------------------------------------------------------------------------------------------------------------------------------------------------------------------------------------------------------------------------------|-------------------------------|--------------------------------------------------------------------------------------------------------------------------------------------------------------------------------------------------------------------------------------------------------------------------------------------------------------------------------------------------------------------------------------------------------------------------------------------------------------------------------------------------------------------------------------------------------------------------------------------------------------------------------------------------------------------------------------------------------------------------------------------------------------------------------------------------------------------------------------------------------------------------------------------|
|    | Absence of pelvic drop/trunk sway in mid stance running on ACLR side stance.                                                                                                                                                                                                                                                                                                                                                                                                                                                                                                                                                                                                                                                                                                                                                                                                                                                                                                                                                                                                                                                                                                                                                                                                            |                               |                                                                                                                                                                                                                                                                                                                                                                                                                                                                                                                                                                                                                                                                                                                                                                                                                                                                                            |
| 26 | <p>No pain or swelling</p> <p>Knee full ROM</p> <p>Stable Knee (pivot-shift, Lachman, instrumented laxity evaluation)</p> <p>Normalised subjective knee function and psychological readiness using patient-reported outcomes (most commonly IKDC, ACL-RSI and Tampa Scale of Kinesiophobia)</p> <p>Isokinetic quadriceps and hamstring peak torque at 60°/s should display 100% symmetry for return to high demand pivoting sports. Restore (as a minimum) preoperative absolute values (if available) and normative values according to the sport and level of activity.</p> <p>Countermovement Jump and Drop Jump &gt;90% symmetry of jump height and concentric and eccentric impulse. Reactive strength index (height/time) &gt; 1.3 for double leg and 0.5 for single leg for field sport athletes (higher for track and field)</p> <p>Jumping biomechanics – normalise absolute and symmetry values for moments, angles, and work in vertical and horizontal jumps especially in sagittal and frontal plane at hip, knee, and ankle.</p> <p>Running mechanics – restoration of &gt;90% symmetry of vertical ground reaction forces and knee biomechanics during stance during high-speed running and change of direction.</p> <p>Complete a sports specific training program.</p> | <b>88.78</b> (83.48 to 94.08) | <p>Does the core stability and control include sth more than hip and pelvis? Should we test also this? Especially for athletes that use their upper limb, eg overhead athletes. The core is extremely important and sometimes we (the surgeons) forget about this. eg a scenario, there may be an overhead athlete that went ACL reconstruction. Should we test his core kinetic chain before going back to sport? But also for any other athlete. Thank you for the suggestions. They were all great!!</p> <p>Difficult to define return to sport criteria</p> <p>There is a lot there, but it is important to know progression and the other factors such as the state of the knee prior to reconstruction.</p> <p>All these criteria make sense, when considering them individually. If all patients should meet all the criteria before discharge, I think the probability is low.</p> |
